# Supplementary material for: An integrated machine learning model of transcriptomic genes in multi-center chronic obstructive pulmonary disease reveals the causal role of TIMP4 in airway epithelial cell
Source: Research Square preprint supplement (doi:10.21203/rs.3.rs-5739006/v1), 2025-04-10
Supplement: Supplementary file 1 [file abf88dd592eedaa7fd05d97e.docx]

**Supplementary Figures**


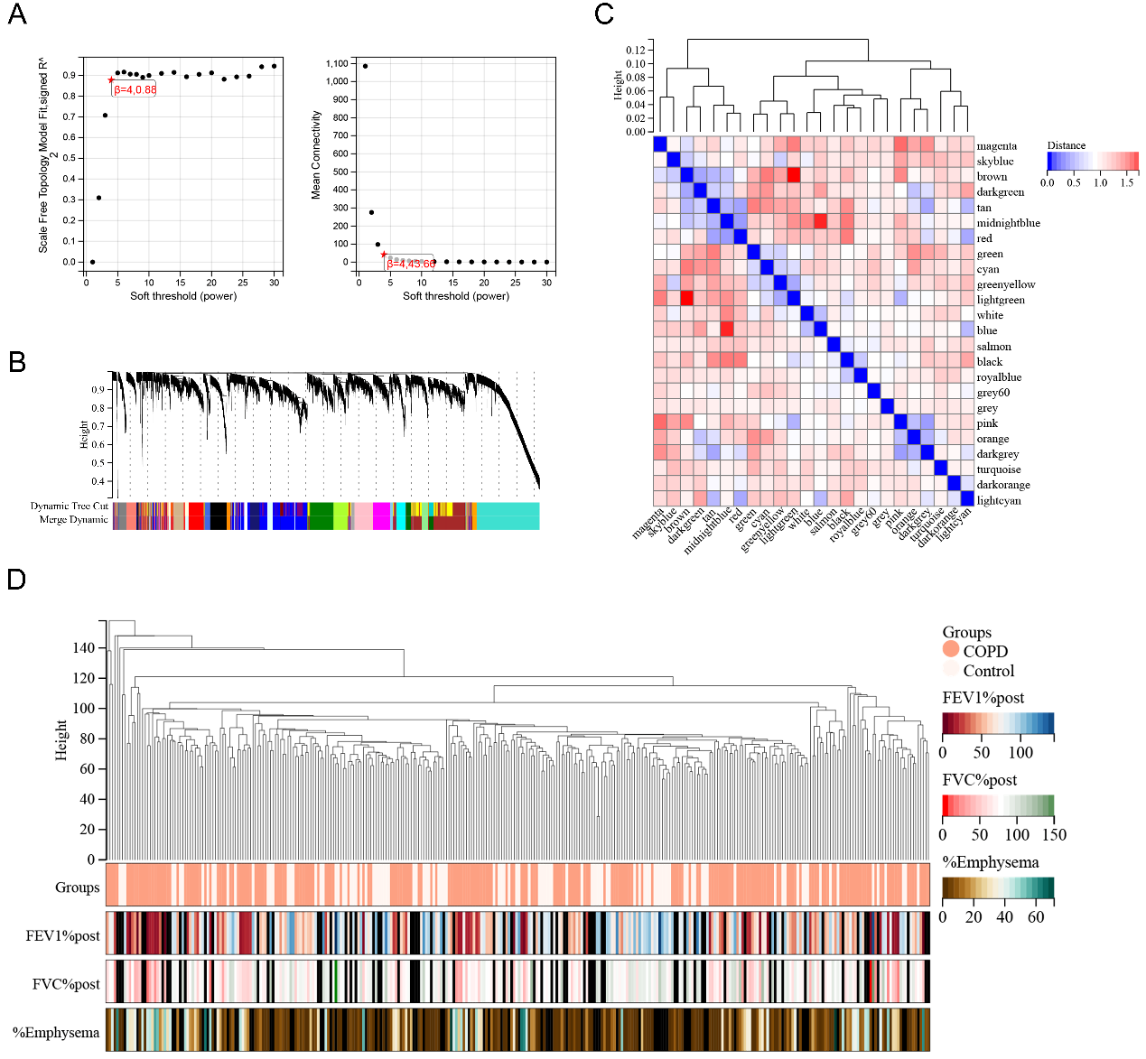


**Supplementary Figure 1**

A Screening of the most suitable soft threshold to build a scale-free network with ideal scale independence and mean connectivity in GSE47460.

B-C Gene clustering dendrogram with module colors and Module eigengene clustering dendrogram in GSE47460.

D Sample dendrogram and trait heatmap in GSE47460, upper panel shows hierarchical clustering of samples and lower panel displays color-coded clinical traits.


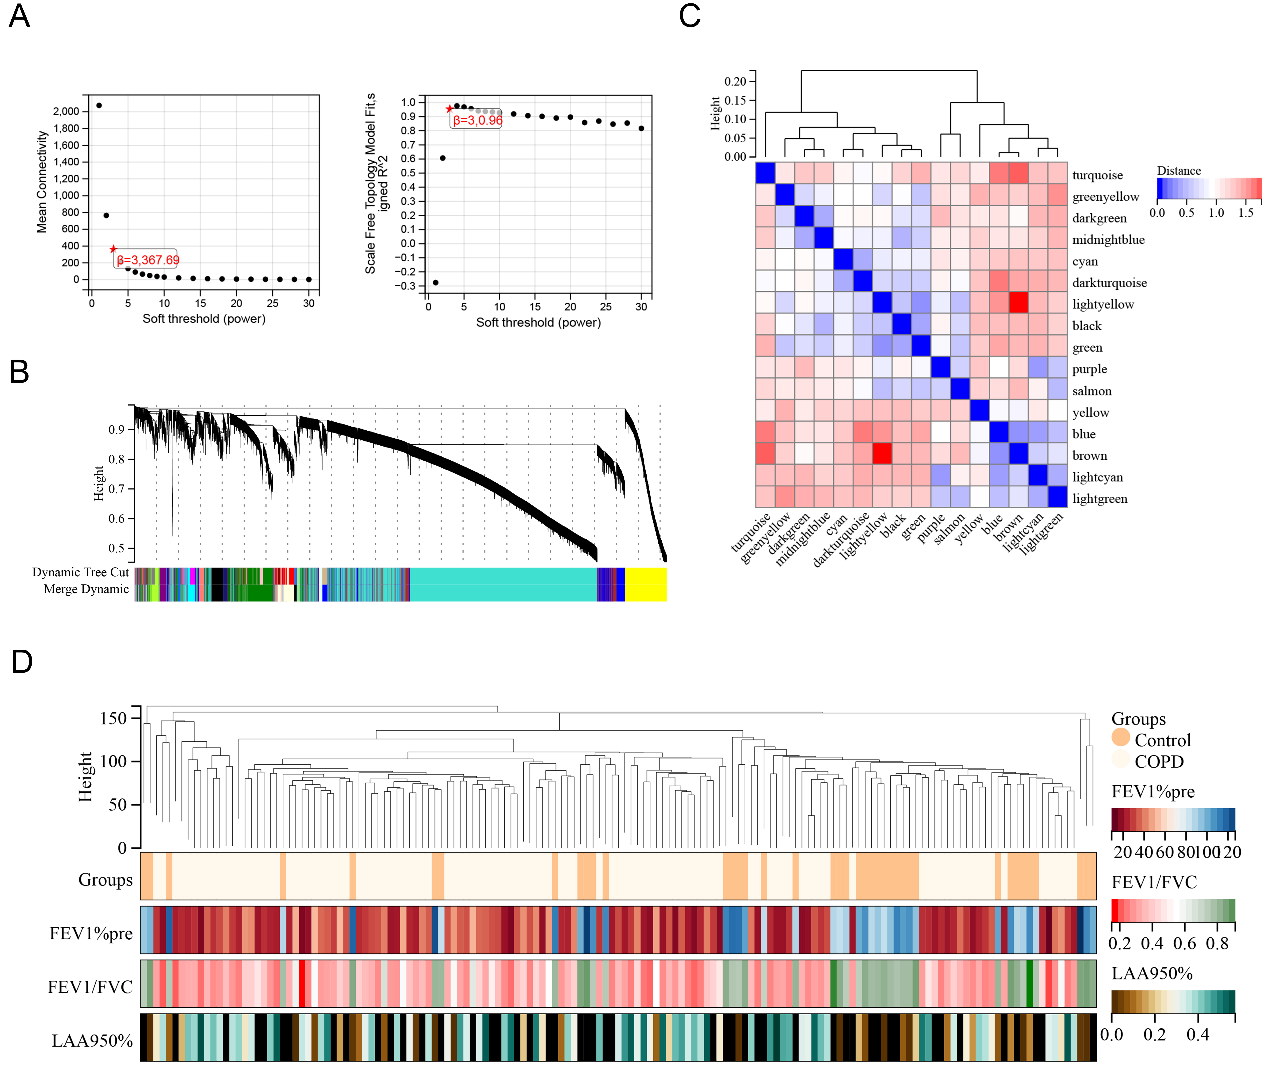


**Supplementary Figure 2**

A Screening of the most suitable soft threshold to build a scale-free network with ideal scale independence and mean connectivity in GSE76925.

B-C Gene clustering dendrogram with module colors and Module eigengene clustering dendrogram in GSE76925.

D Sample dendrogram and trait heatmap in GSE76925, upper panel shows hierarchical clustering of samples and lower panel displays color-coded clinical traits.


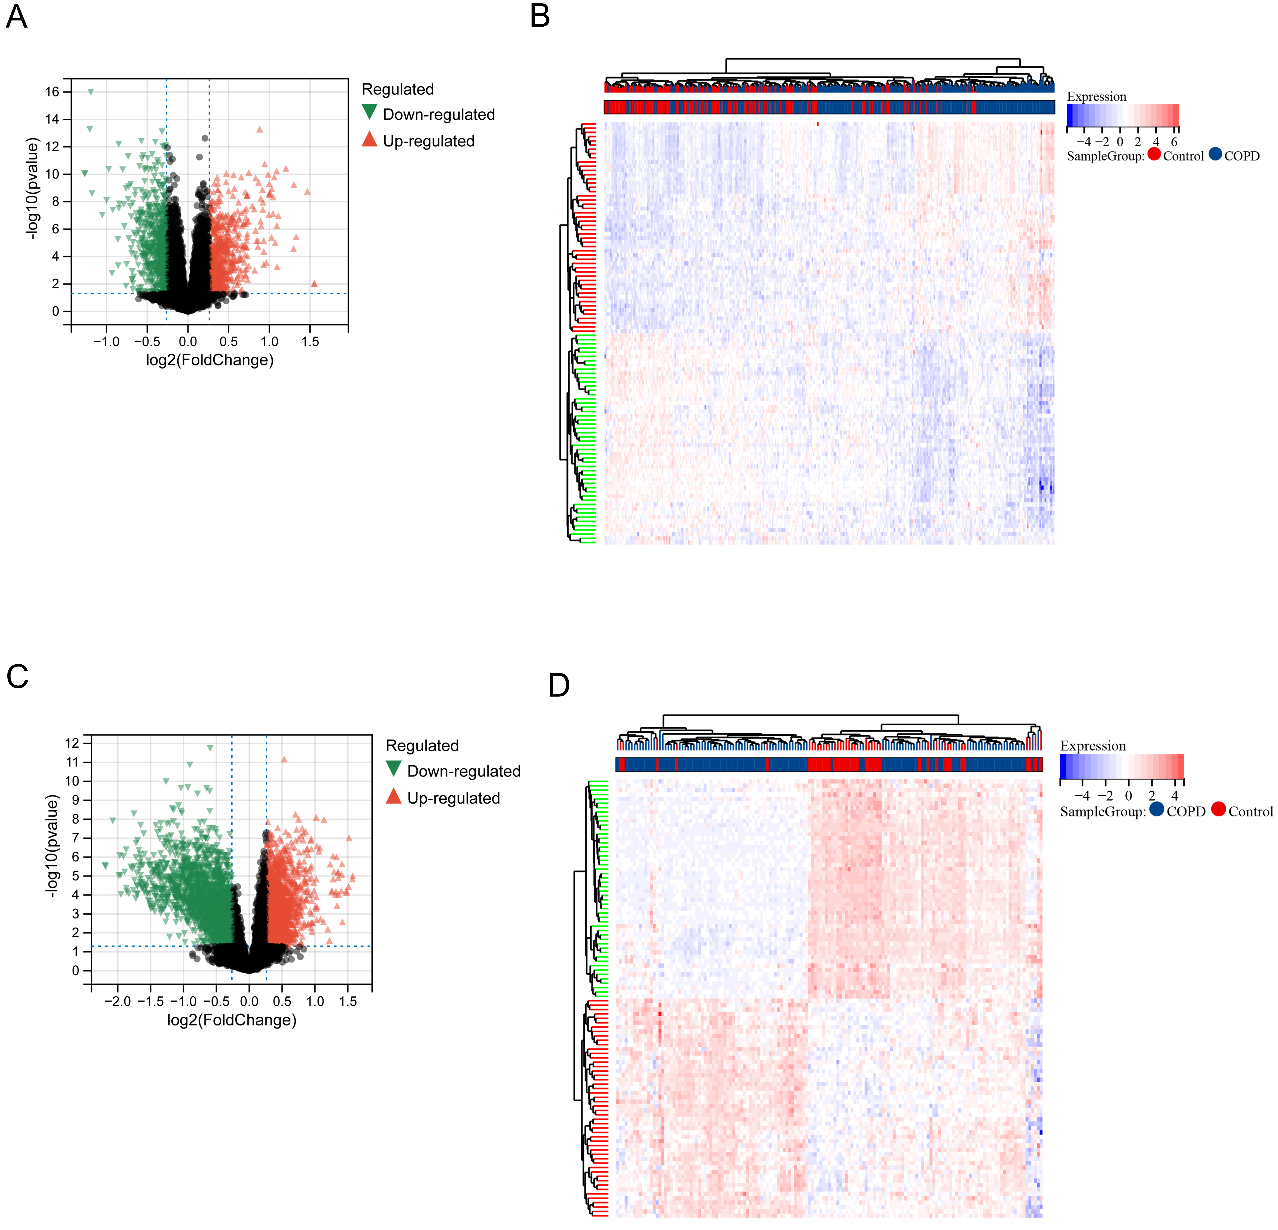


**Supplementary Figure 3**

A Volcano plot for DEGs in GSE47460.

B The heatmap is clustered using both samples and top differerntial genes categories in GSE47460.

C Volcano plot for DEGs in GSE76925.

D The heatmap is clustered using both samples and top differerntial genes categories in GSE76925.


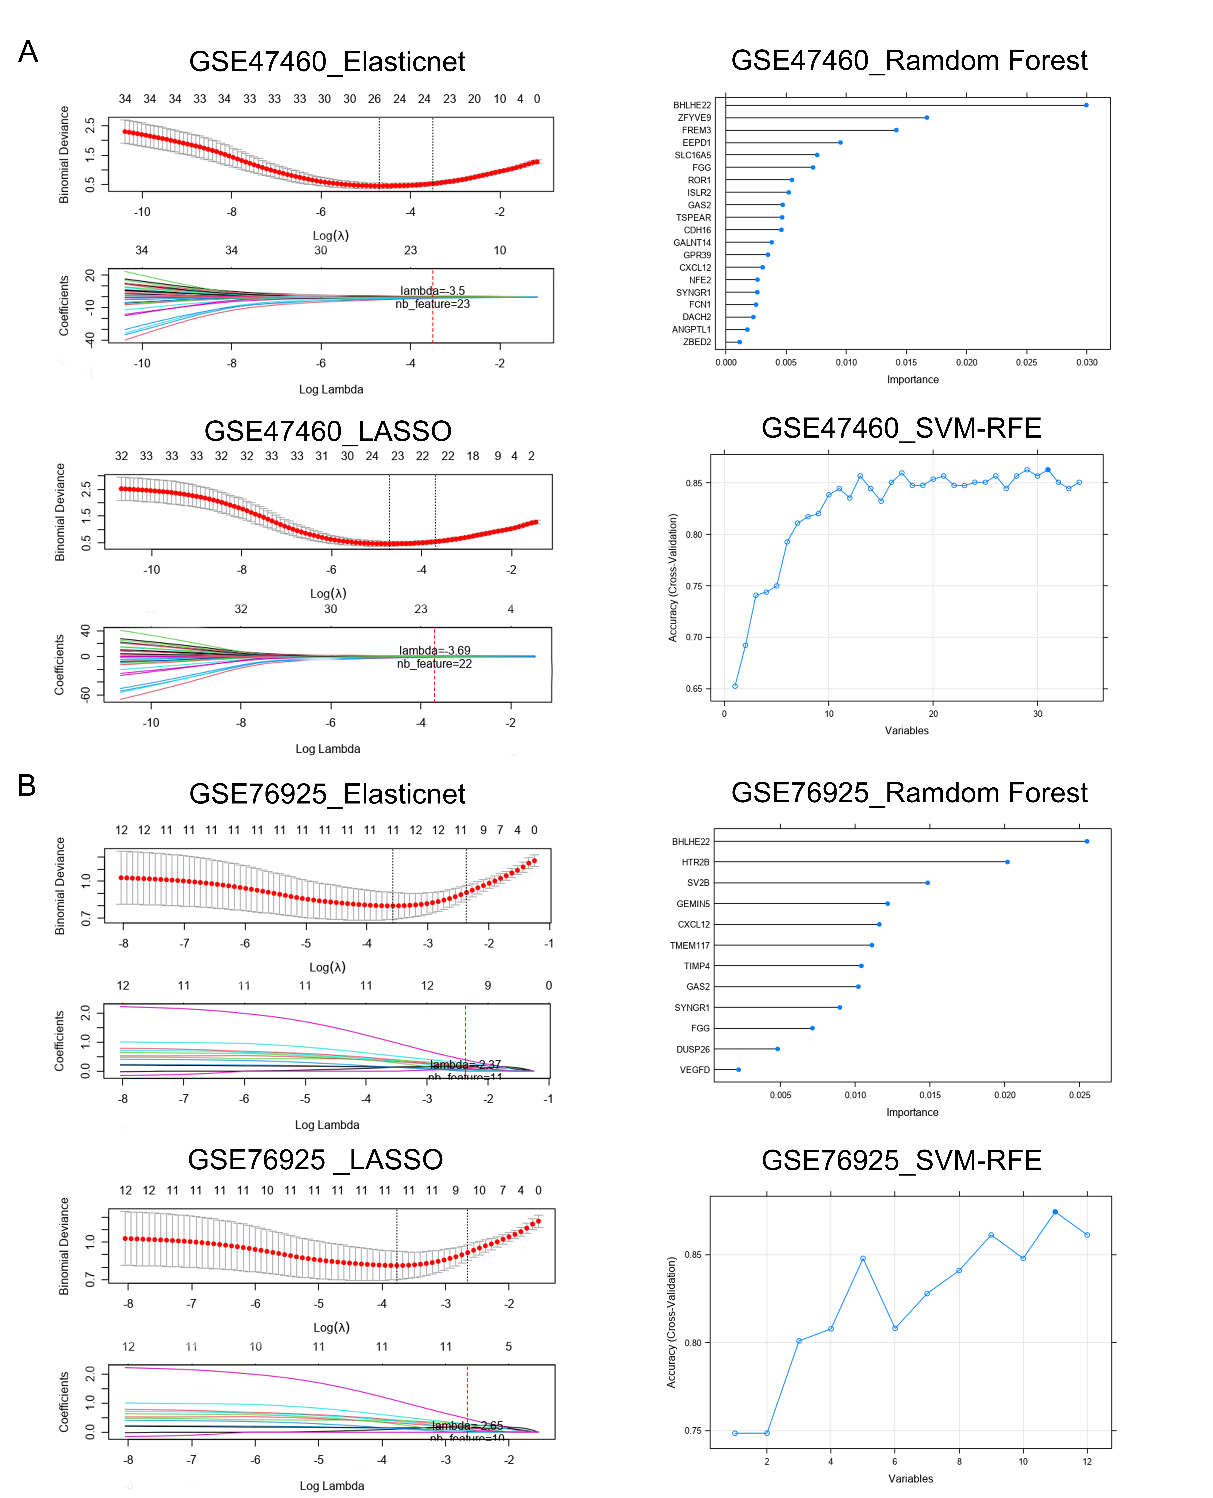


**Supplementary Figure 4**

**A** Four algorithms (Elasticnet, LASSO, Random Forest and SVM-RFE) were used to screen for the core signature genes associated with COPD progression in GSE47460.

**B** Four algorithms (Elasticnet, LASSO, Random Forest and SVM-RFE) were used to screen for the core signature genes associated with COPD progression in GSE76925.


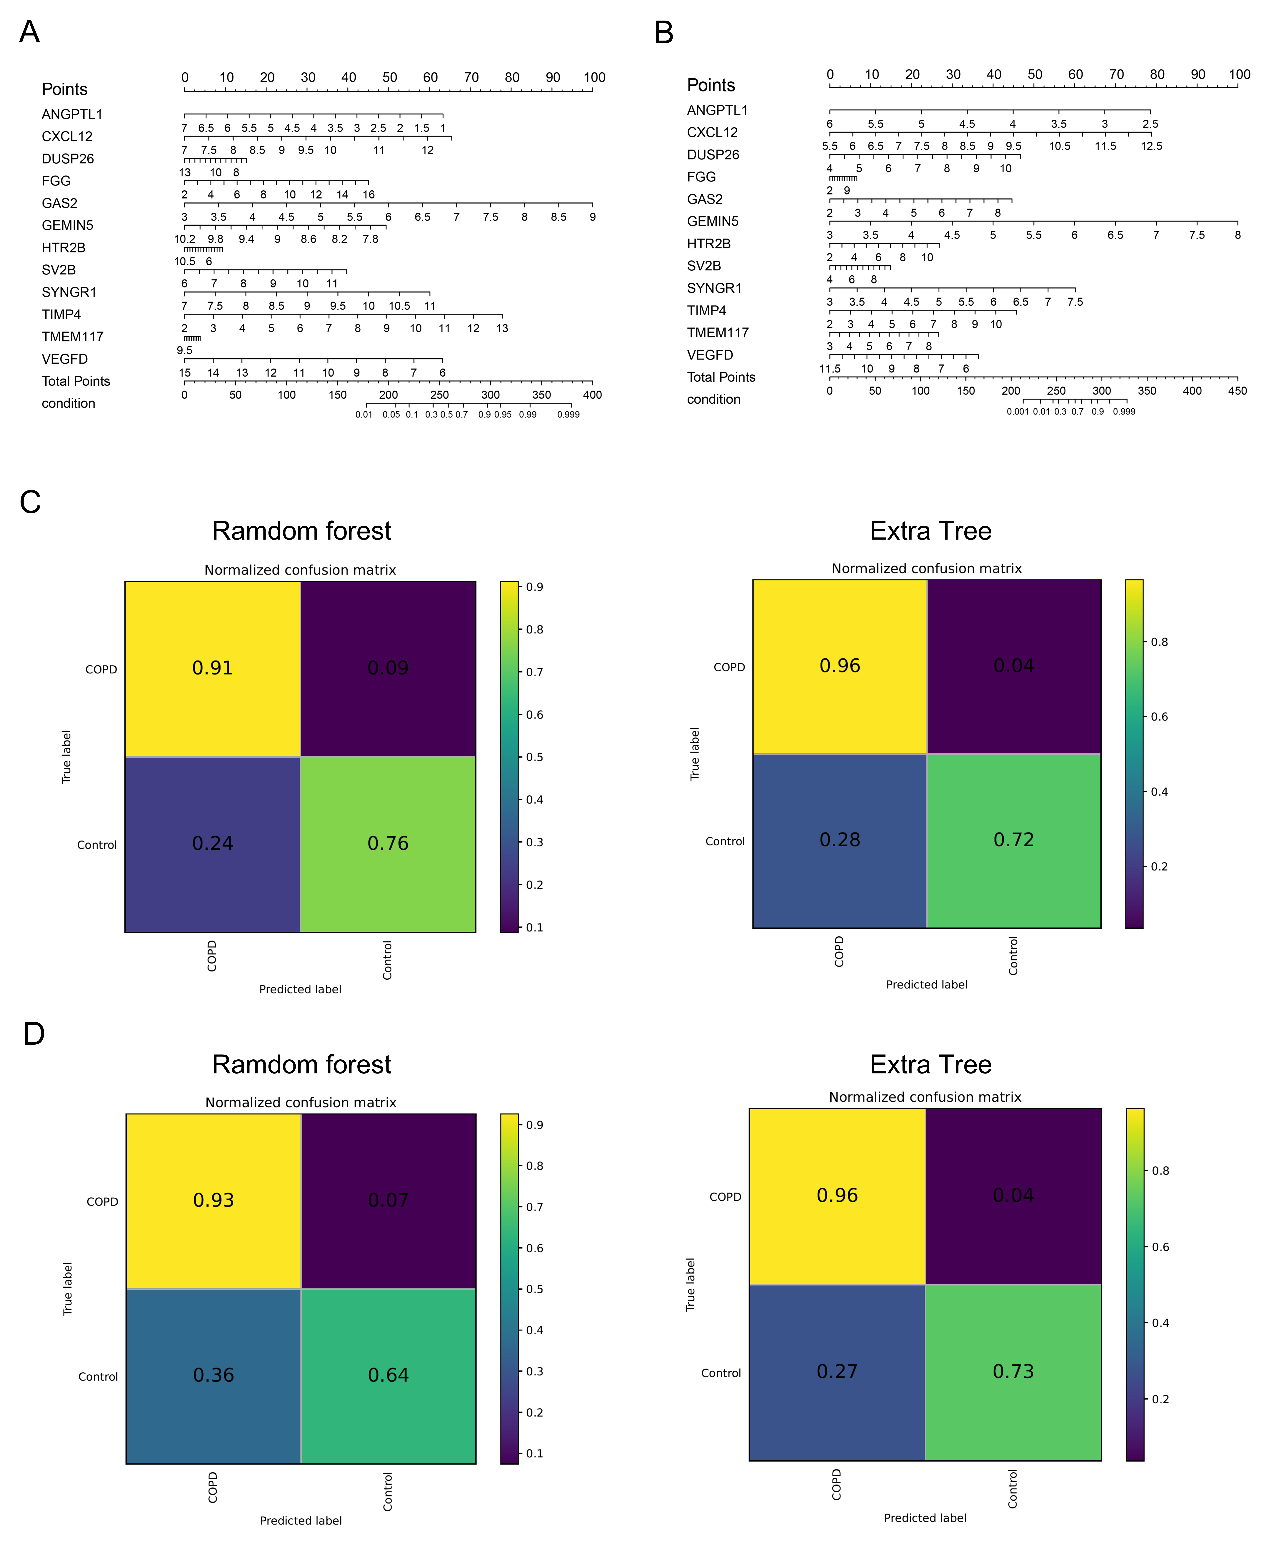


**Supplementary Figure 5**

A-B The *Nomogram* for 13 candidated genes in GSE47460 (A) and GSE76925 (B).

C-D The results of the model training set and validation set were presented in the form of a *confusion* matrix in GSE47460 (C) and GSE76925 (D).


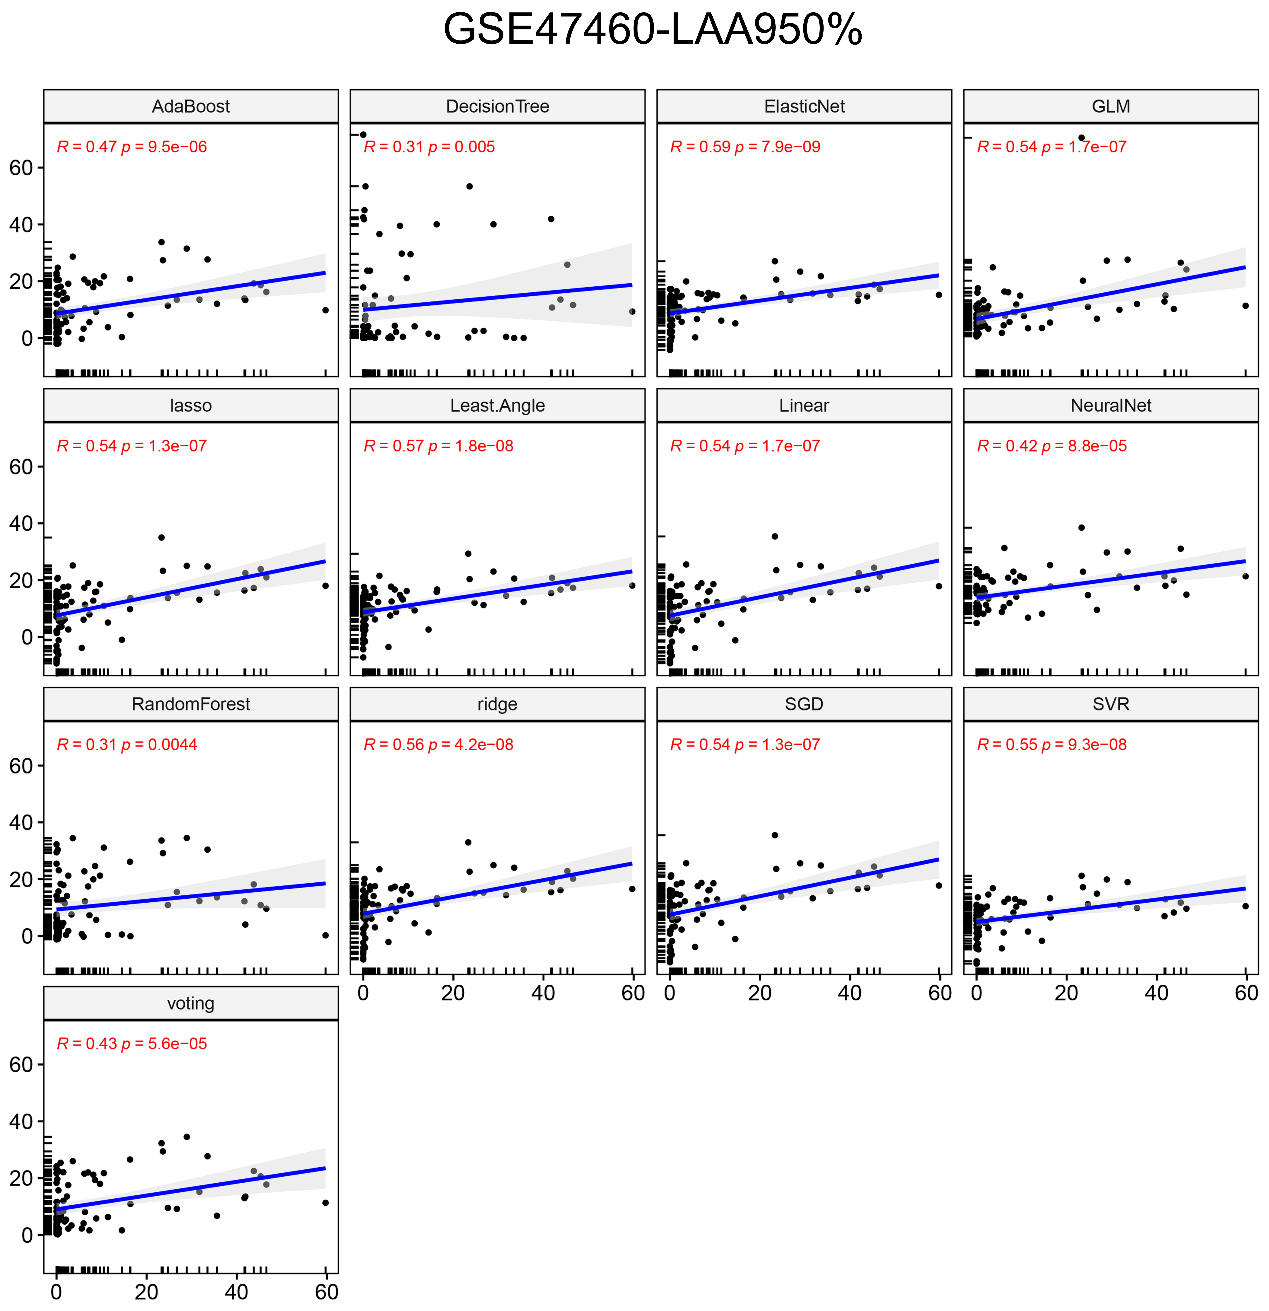


**Supplementary Figure 6**

Scatter plots showing predicted versus observed FEV1% predicted values for each of the 13 regression models (AdaBoost, Decision Tree, ElasticNet, GLM, Lasso, Least.Angle, Linear, NeuralNet, RandomForest, Ridge, SGD, SVR and voting) in GSE47460. Each point represents a sample in the test set. R-squared values and *p* values are displayed for each model.


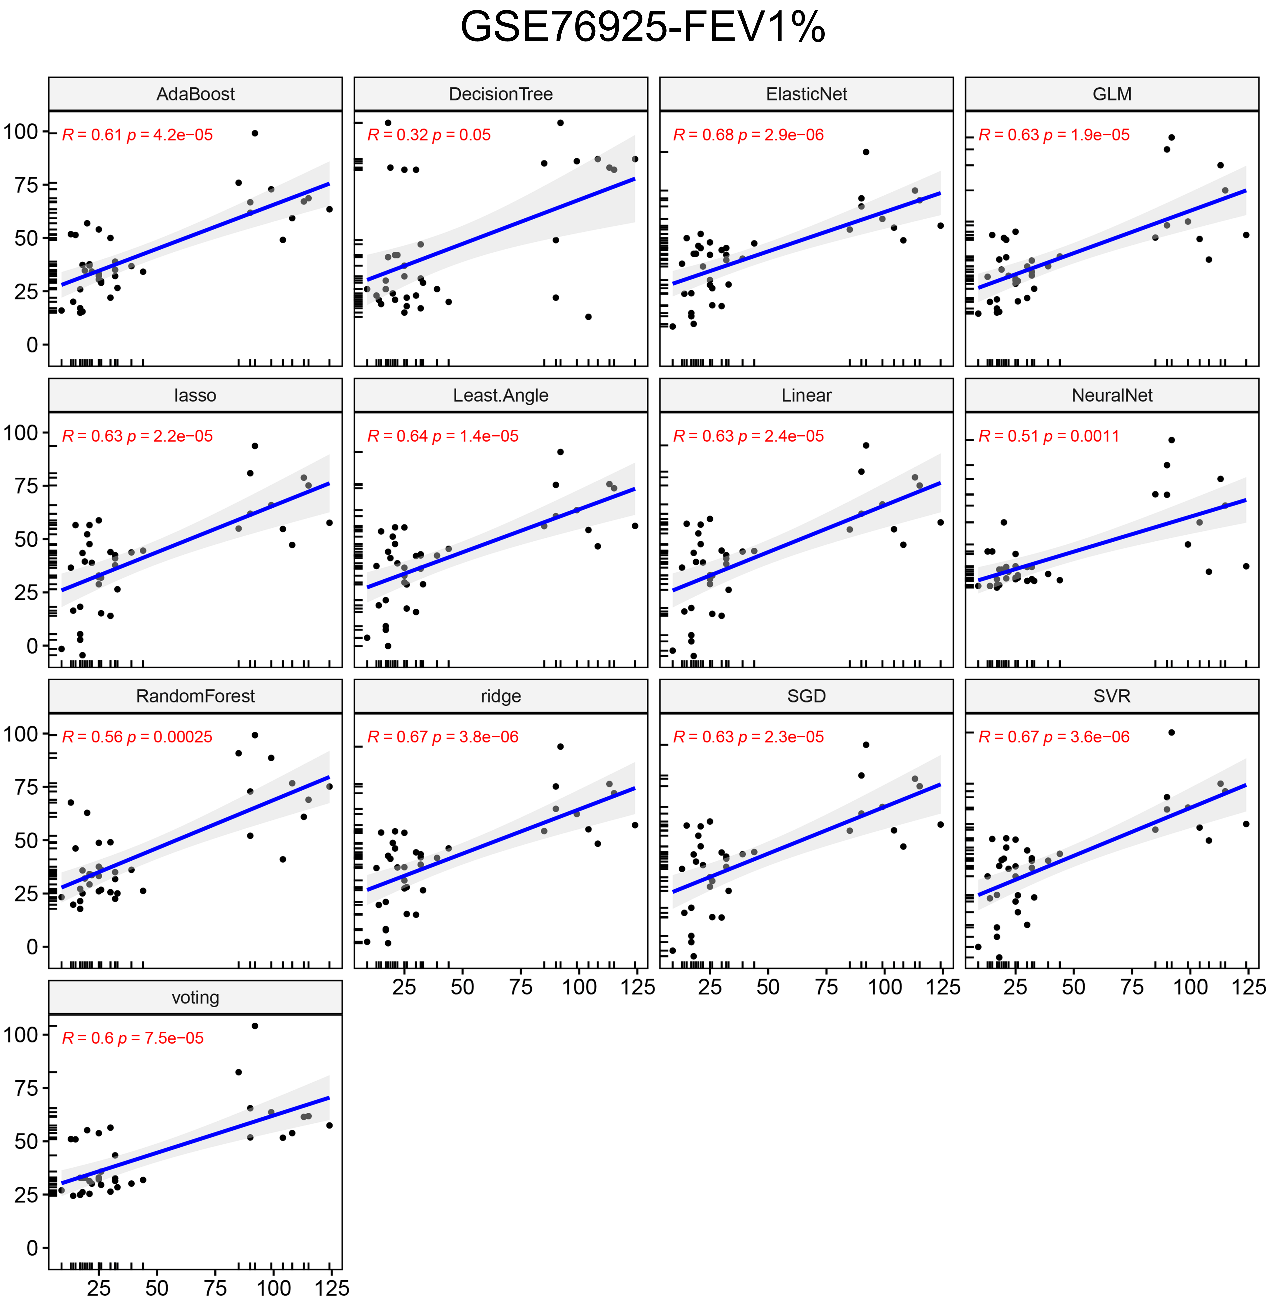


**Supplementary Figure 7**

Scatter plots showing predicted versus observed FEV1% predicted values for each of the 13 regression models (AdaBoost, Decision Tree, ElasticNet, GLM, Lasso, Least.Angle, Linear, NeuralNet, RandomForest, Ridge, SGD, SVR and voting) in GSE76925. Each point represents a sample in the test set. R-squared values and *p* values are displayed for each model.


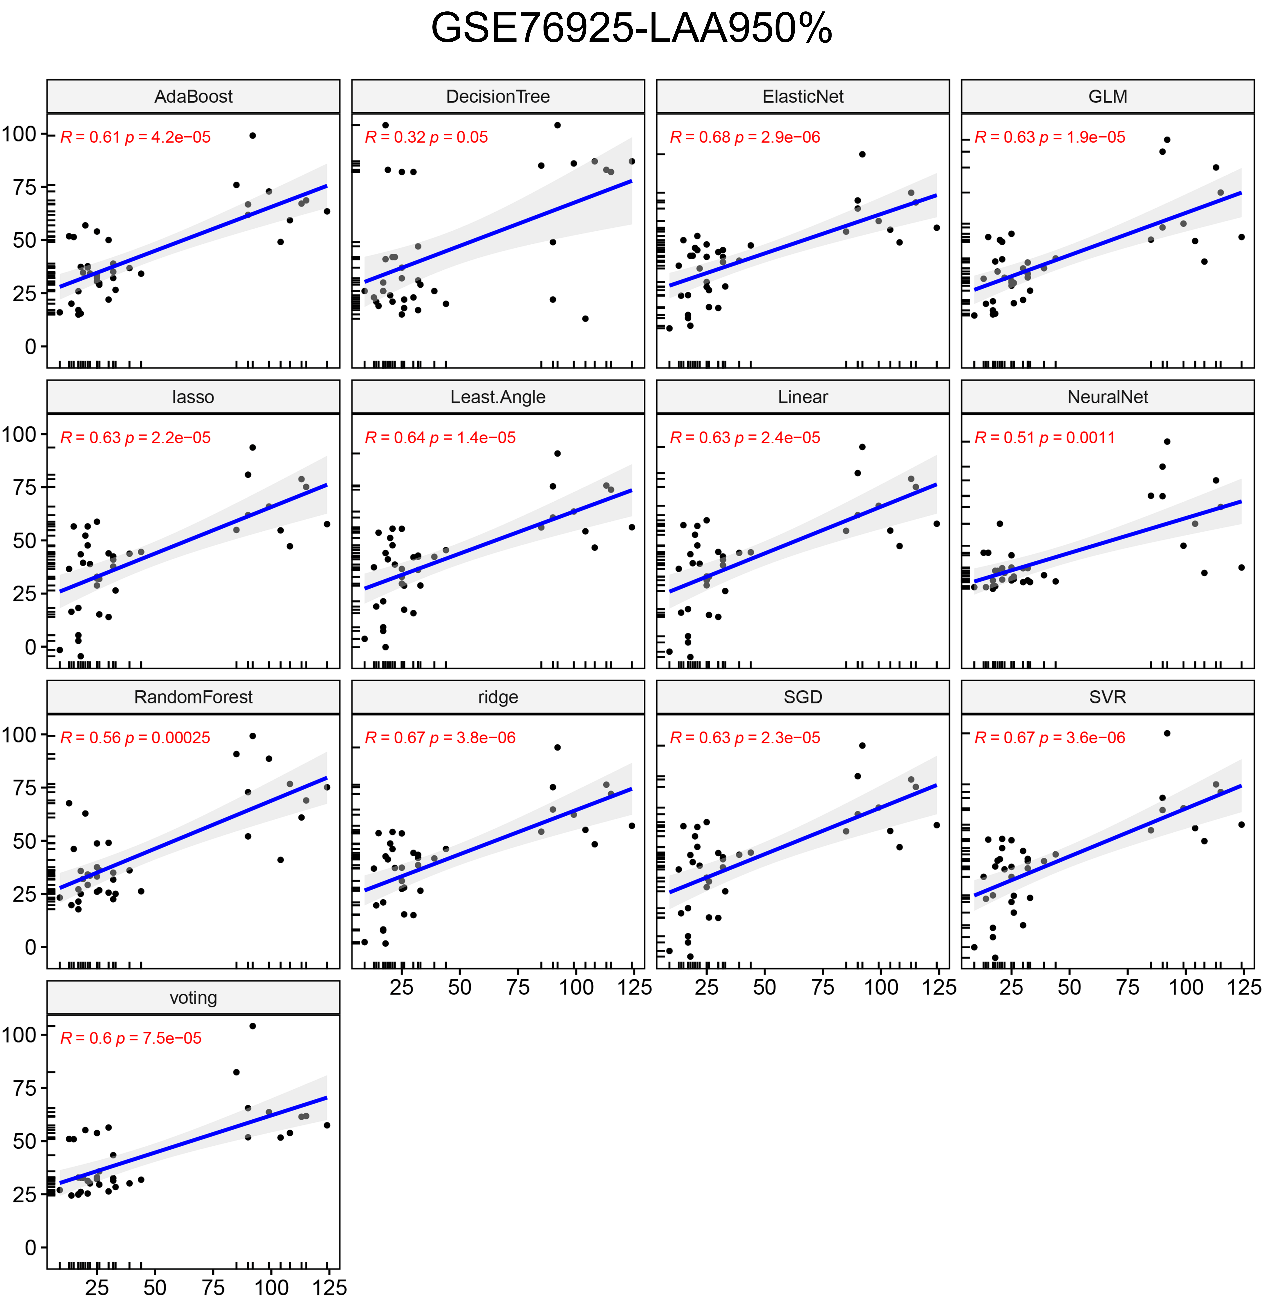


**Supplementary Figure 8**

Scatter plots showing predicted versus observed %LAA950 predicted values for each of the 13 regression models (AdaBoost, Decision Tree, ElasticNet, GLM, Lasso, Least.Angle, Linear, NeuralNet, RandomForest, Ridge, SGD, SVR and voting) in GSE76925. Each point represents a sample in the test set. R-squared values and *p* values are displayed for each model.


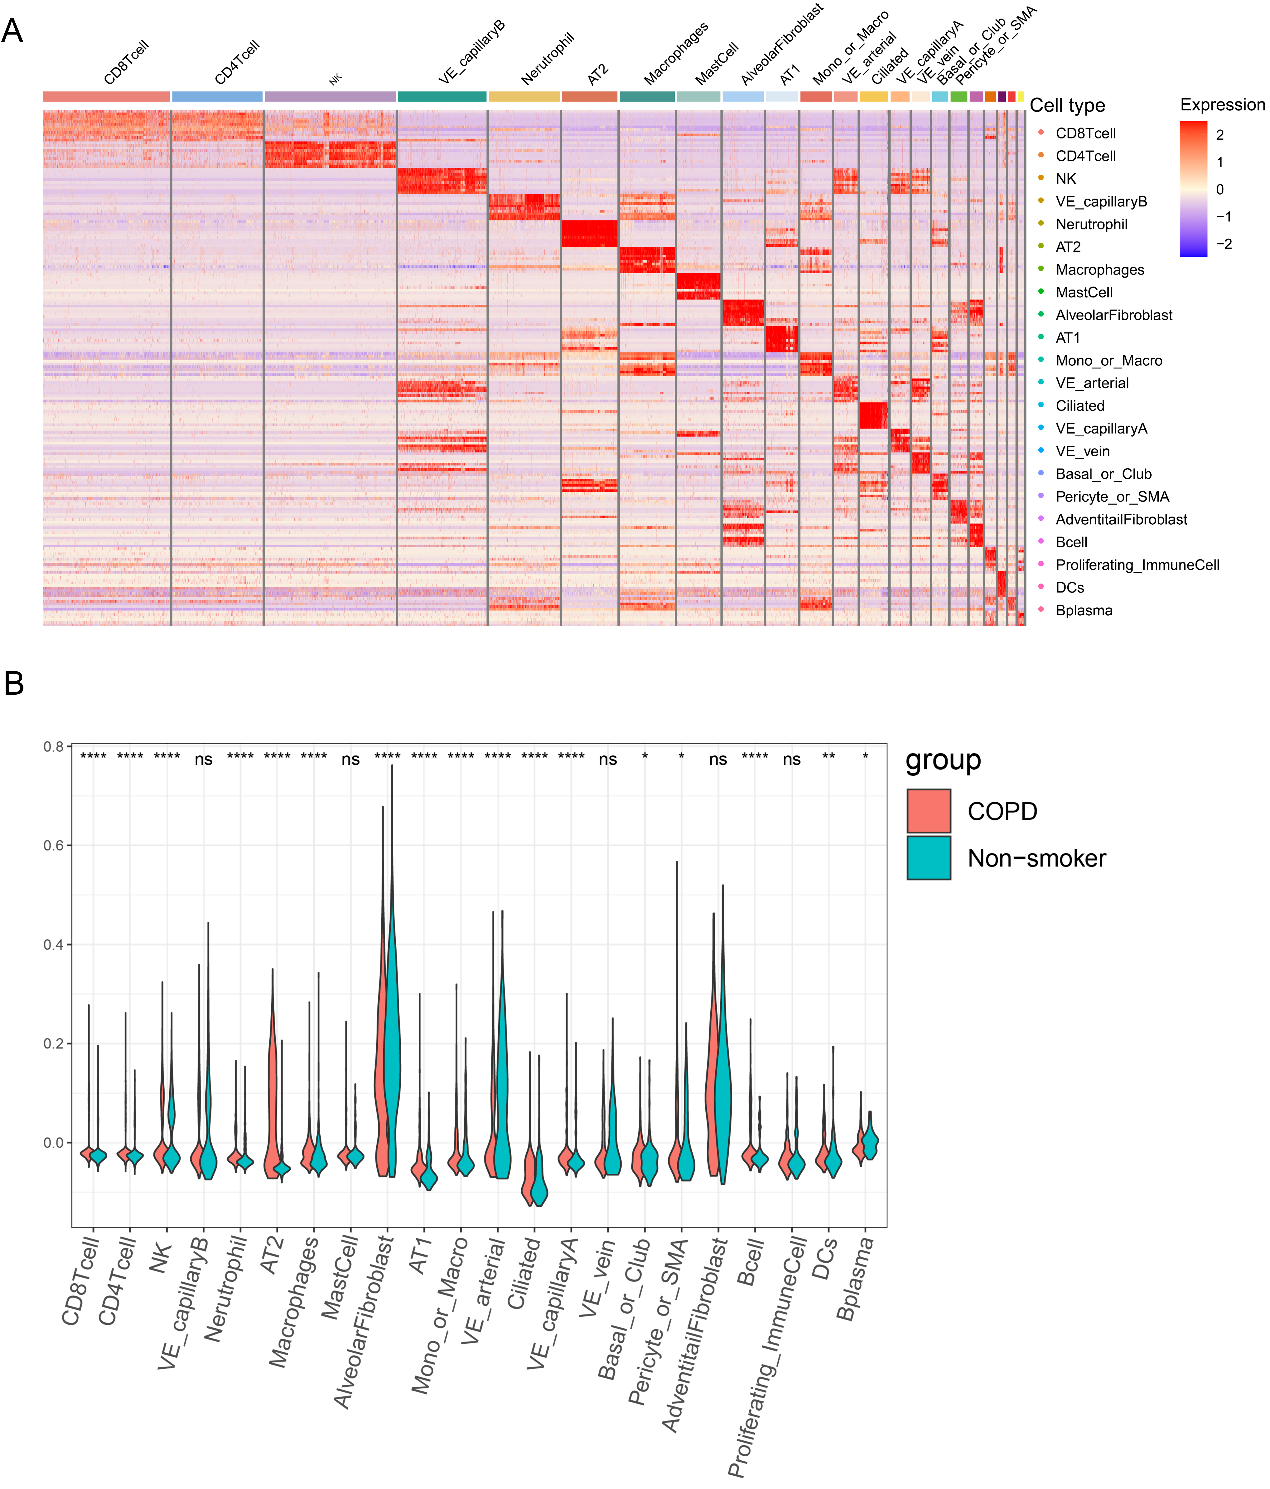


**Supplementary Figure 9**

A Heatmap illustrates the top marker genes for various cell subgroups in the GSE173896 dataset.

B Violin plots depicting the distribution of gene expression scores for various cell subpopulations in COPD patients and non-smokers in GSE173896 dataset. P values shown in charts determined by two-tailed Student's t-test (**p* < 0.05, ***p* < 0.01, ****p* < 0.001 and *****p* < 0.0001).


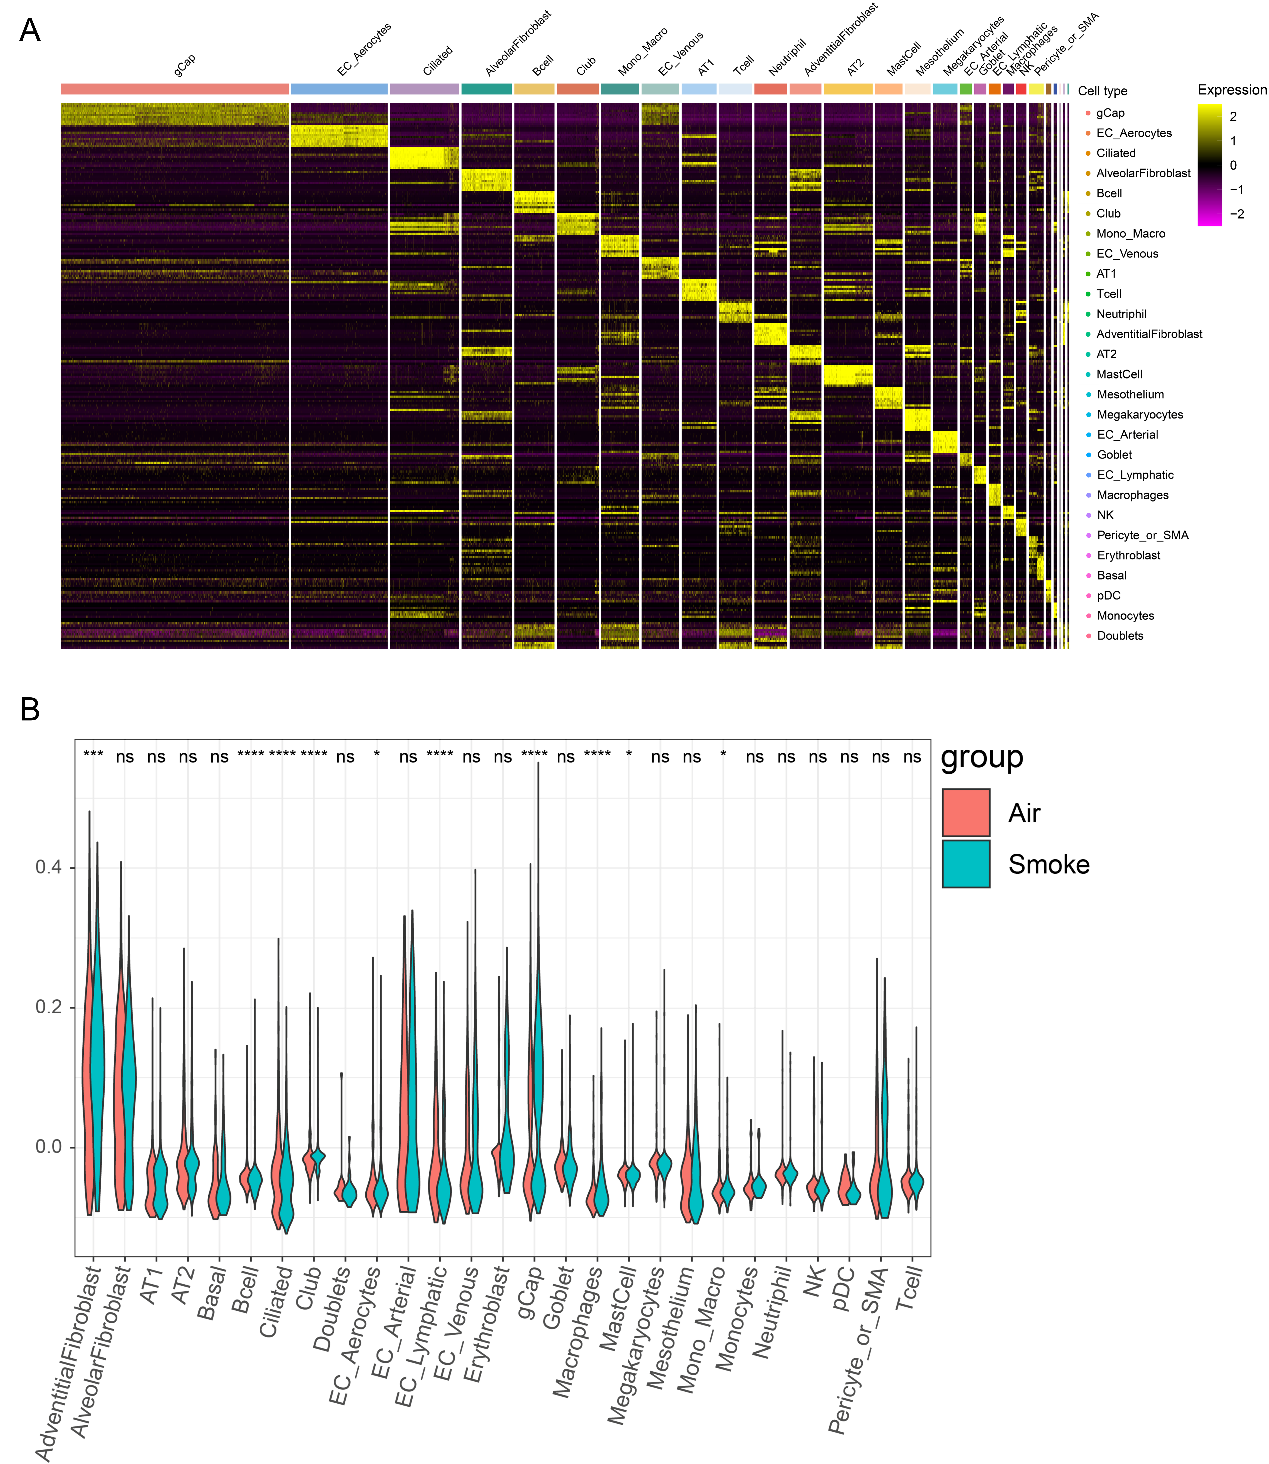
 Supplementary Figure 10

A Heatmap illustrates the top marker genes for various cell subgroups in the GSE168299 dataset.

B Violin plots depicting the distribution of gene expression scores for various cell subpopulations in Air group and Smoke group in GSE168299 dataset P values shown in charts determined by two-tailed Student's t-test (**p* < 0.05, ***p* < 0.01, ****p* < 0.001 and *****p* < 0.0001).


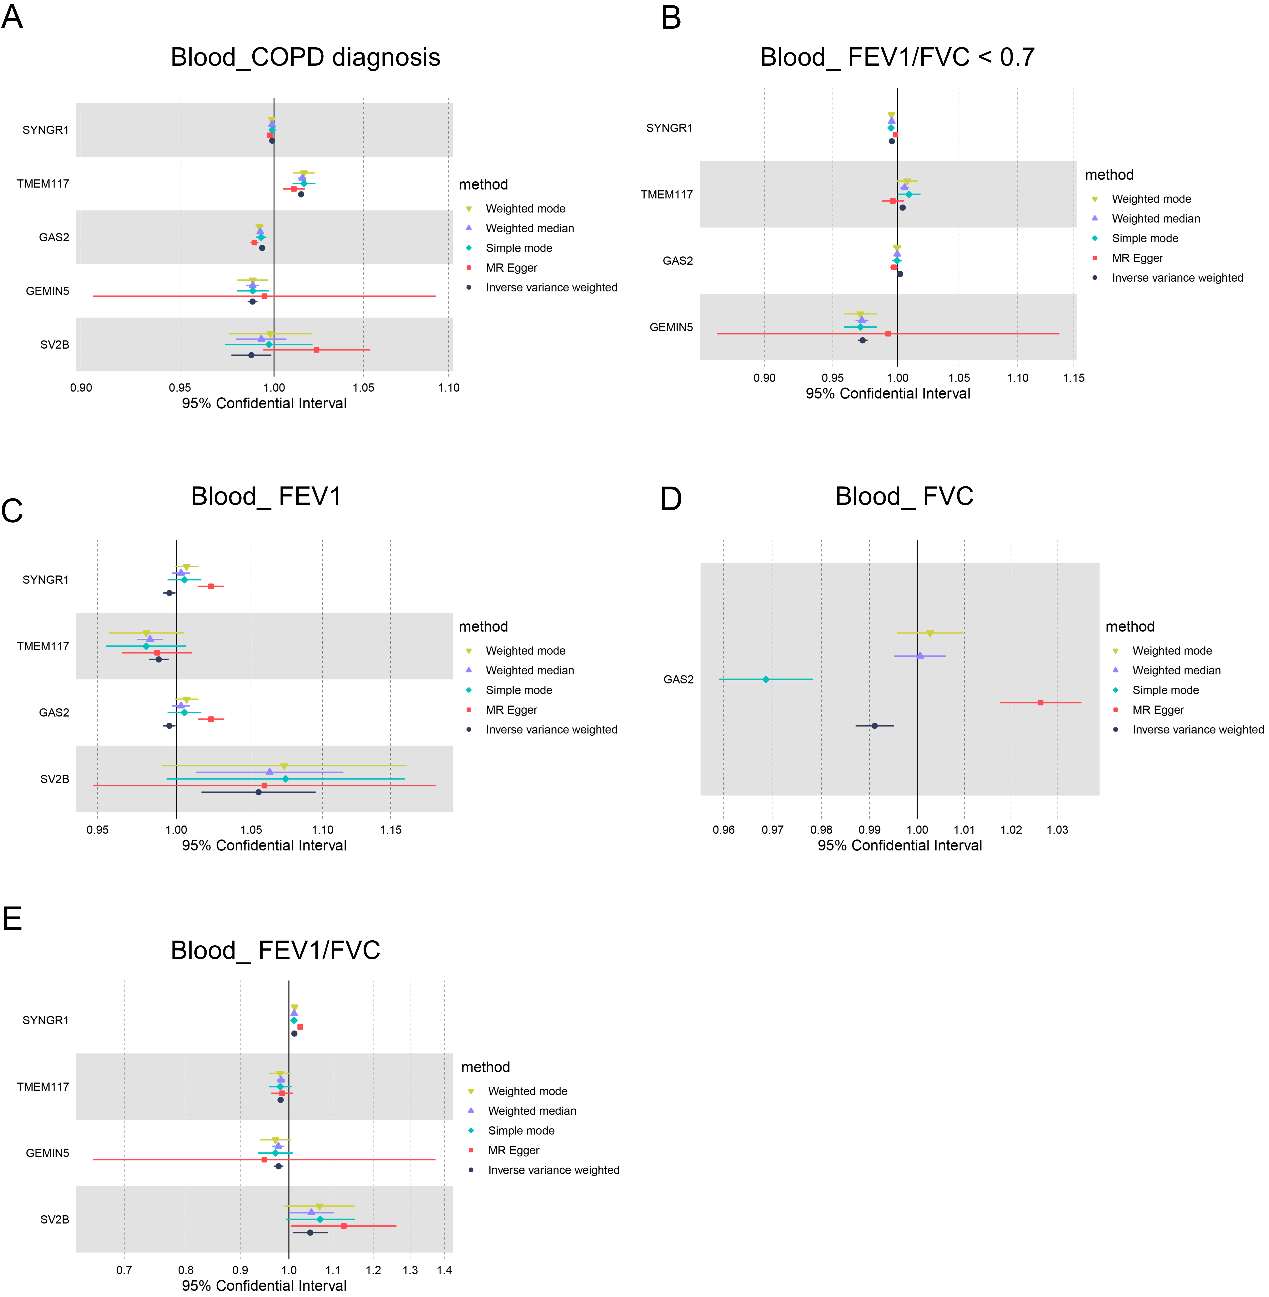


**Supplementary Figure 11**

A-E The forest plot depicts the eQTLs in whole blood from GTEx_v8 database of 13 genes as exposure and COPD diagnosis (A), as well as FEV1/FVC<0.7 (B), FEV1 (C), FVC(D) and FEV/FVC (E) as outcomes. Only statistical results are visualized. An odds ratio (OR) greater than 1 suggests that the respective mediator increases the risk of outcome, while an OR less than 1 indicates a negative effect.


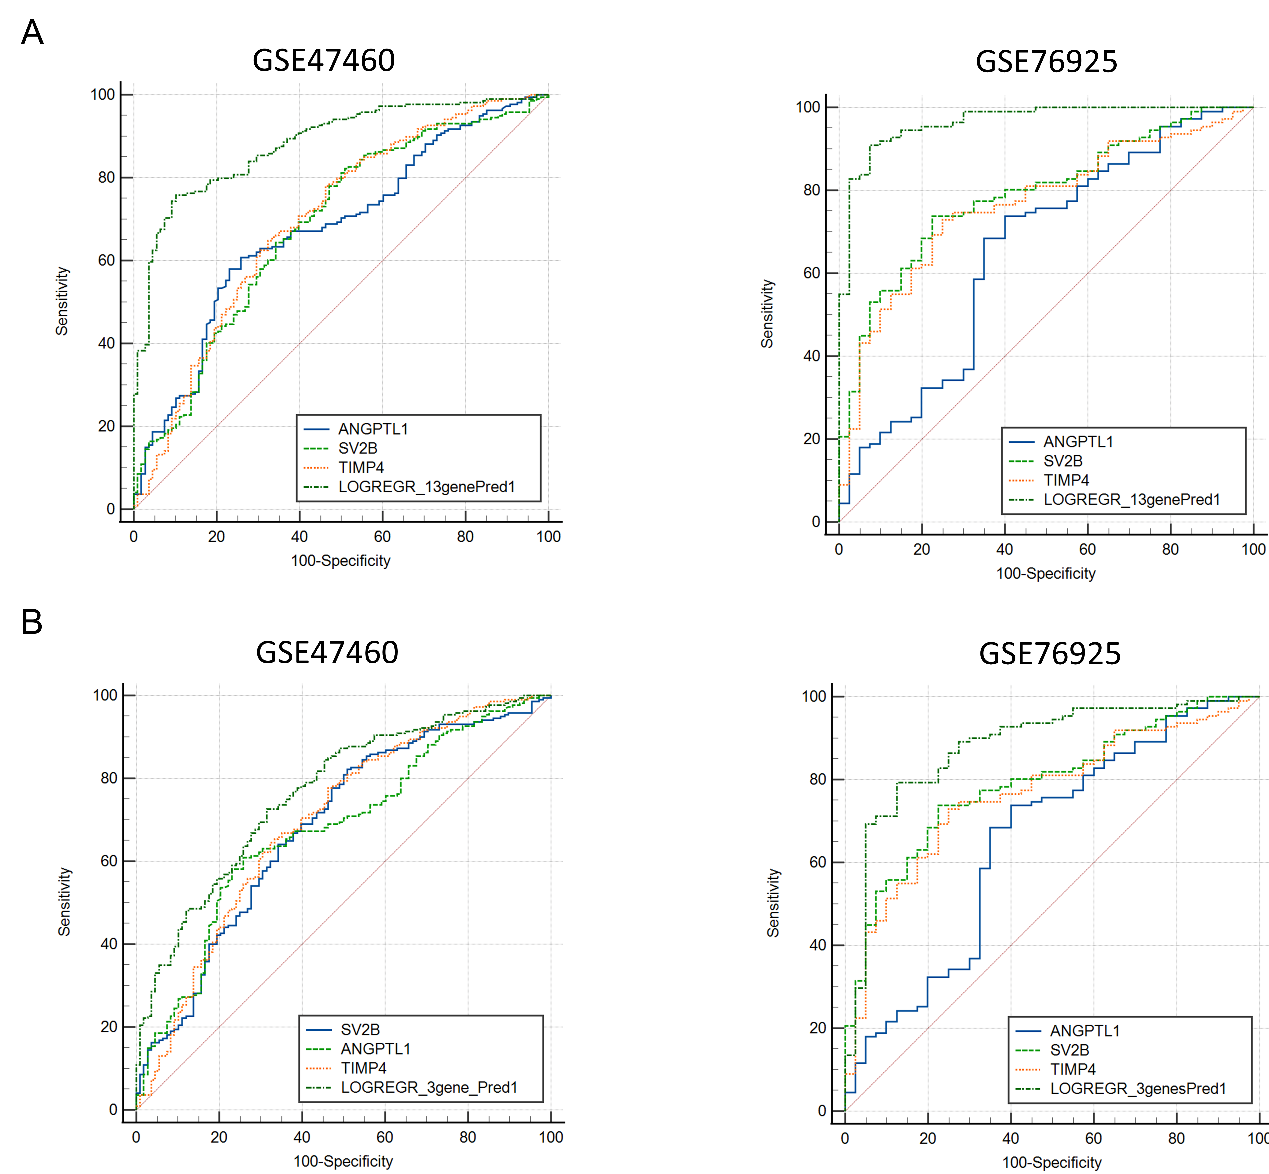


**Supplementary Figure 12**

A-B ROC curves for GSE47460 dataset (A) and ROC curves for GSE76925 dataset (B). Each panel shows four curves: ANGPTL1 (green), SV2B (lightgreen), TIMP4 (orange), and the combined 13-gene model (darkgreen). AUC values are displayed in the legend for each curve. The diagonal line represents random classification (AUC = 0.5).


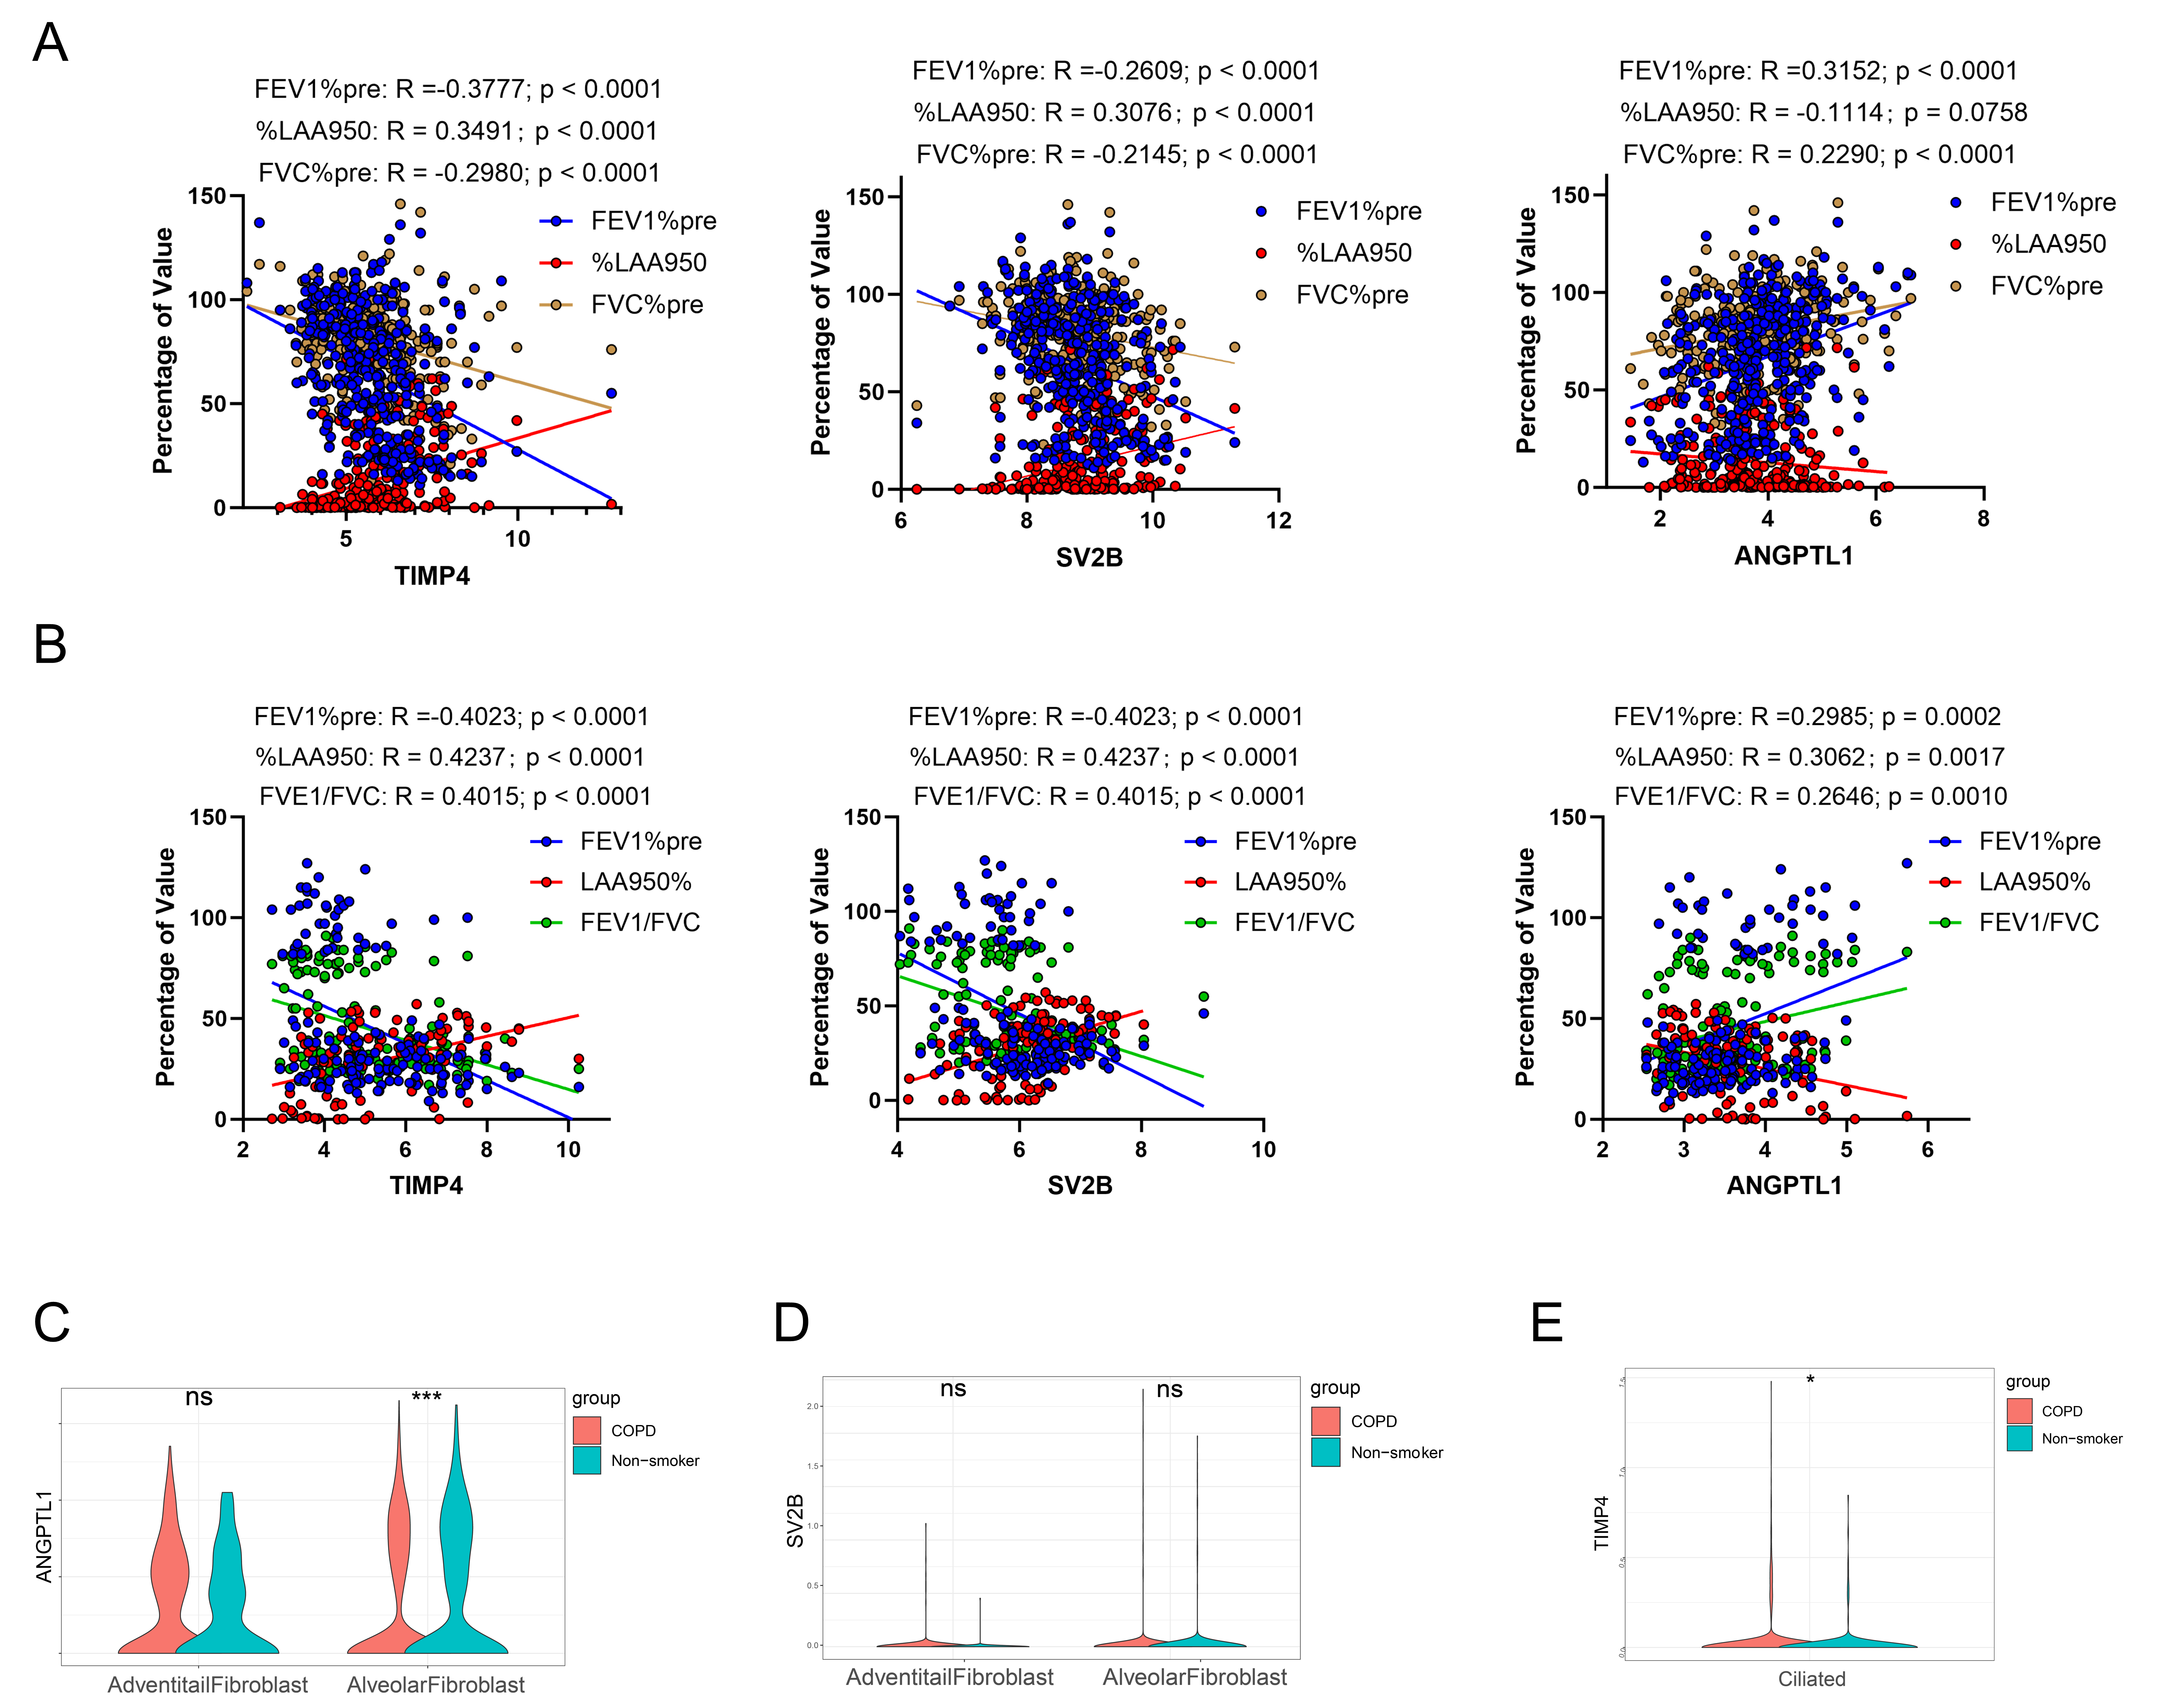


**Supplementary Figure 13**

**A-B** Scatter plots illustrating the relationships between gene expression levels (ANGPTL1, SV2B, TIMP4) and clinical parameters (FEV1% predicted, %LAA950, FVC% predicted or FEV1/FVC) in GSE47460 (A) or GSE76925 (B). Each point represents an individual sample. Regression lines with 95% confidence intervals are shown. Spearman correlation coefficients (r) and p-values are displayed for each plot.

**C-D** Violin plots depicting the expression levels of ANGPTL1 (C) and SV2B (D) in Adventitial Fibroblasts and Alveolar Fibroblasts from non-smokers and COPD patients. Statistical significance between groups is denoted by asterisks.

**E** Violin plots depicting the expression levels of TIMP4 in Ciliated from non-smokers and COPD patients. Statistical significance between groups is denoted by asterisks.

Data shown mean ± SD. P values shown in charts determined by two-tailed student test (C-E) and Pearson Correlation (A-B). **p* < 0.05, ***p* < 0.01, ****p* < 0.001.


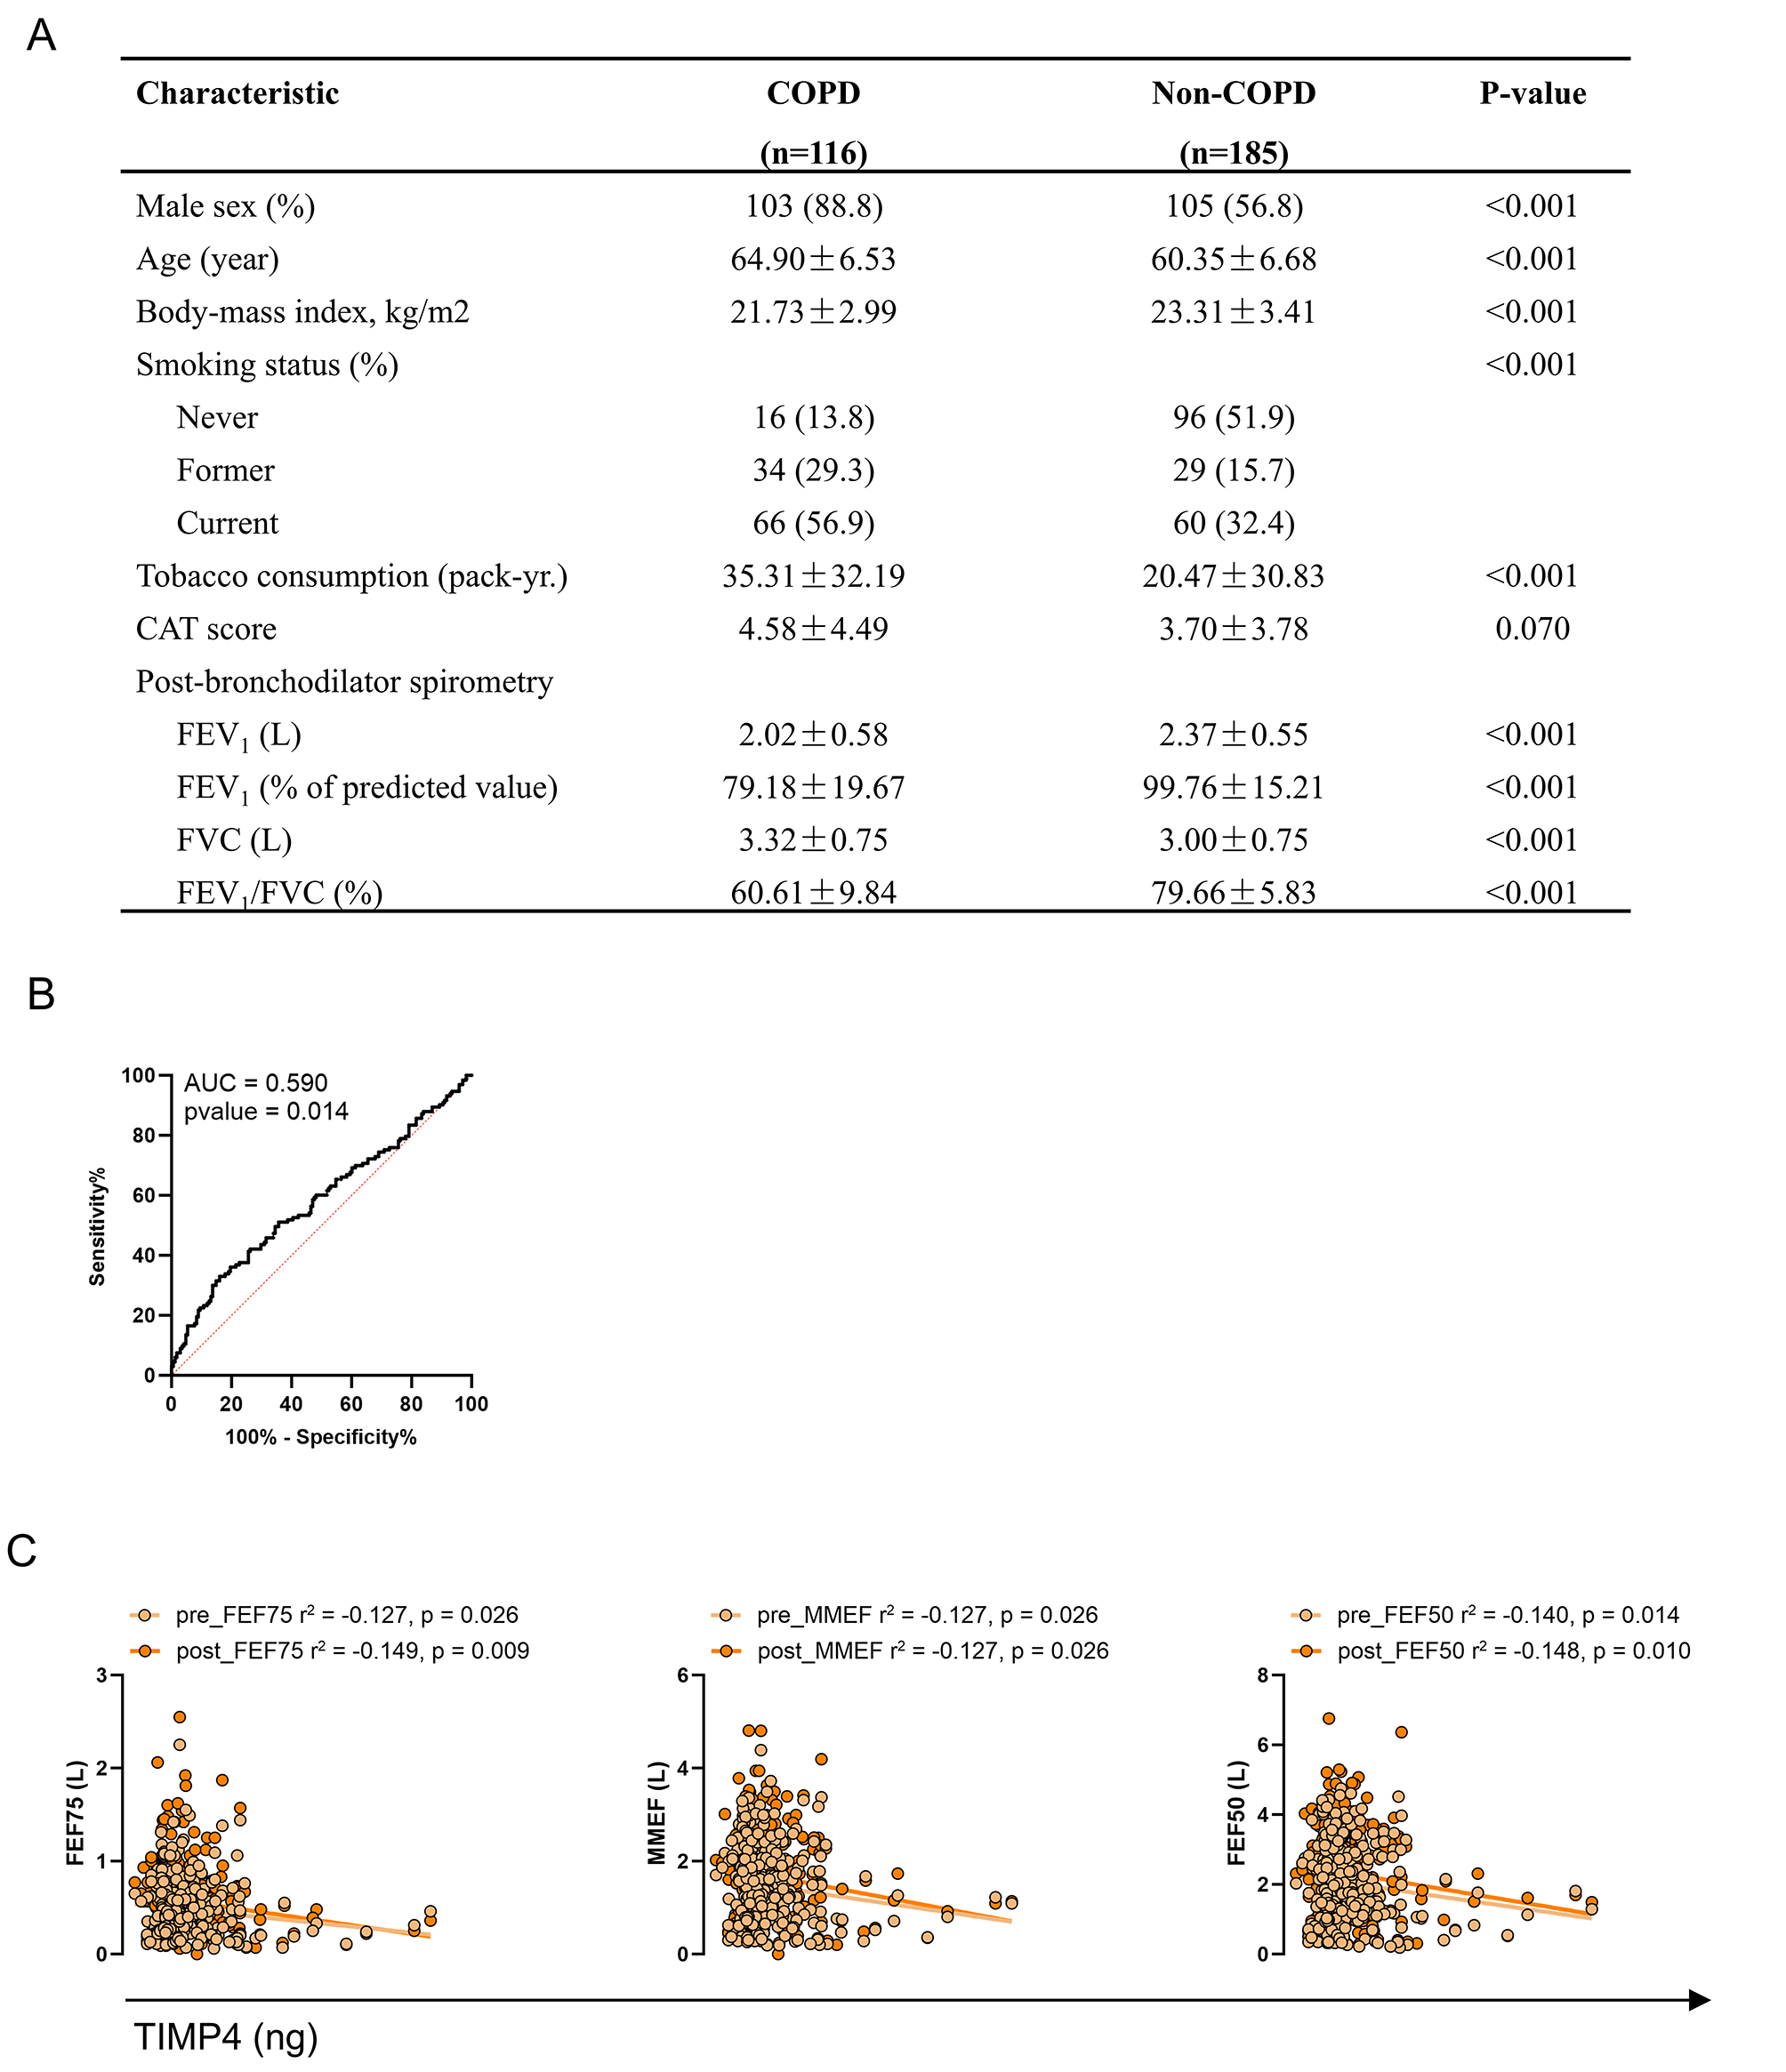


Supplementary Figure 14

A Demographic characteristics of the 301 individuals sampled from the ECOPD cohort, presented in a three-line table.

B Receiver operating characteristic (ROC) curve analysis was conducted to assess the expression levels of TIMP4 in COPD patients.

C Analysis of the correlation between peripheral blood TIMP4 secretion levels and pre-FEF75, pre-MMEF, and pre-FEF50.

P values shown in charts determined by two-tailed Student's t-test (A) and *pearson* correlation two-tailed (B).


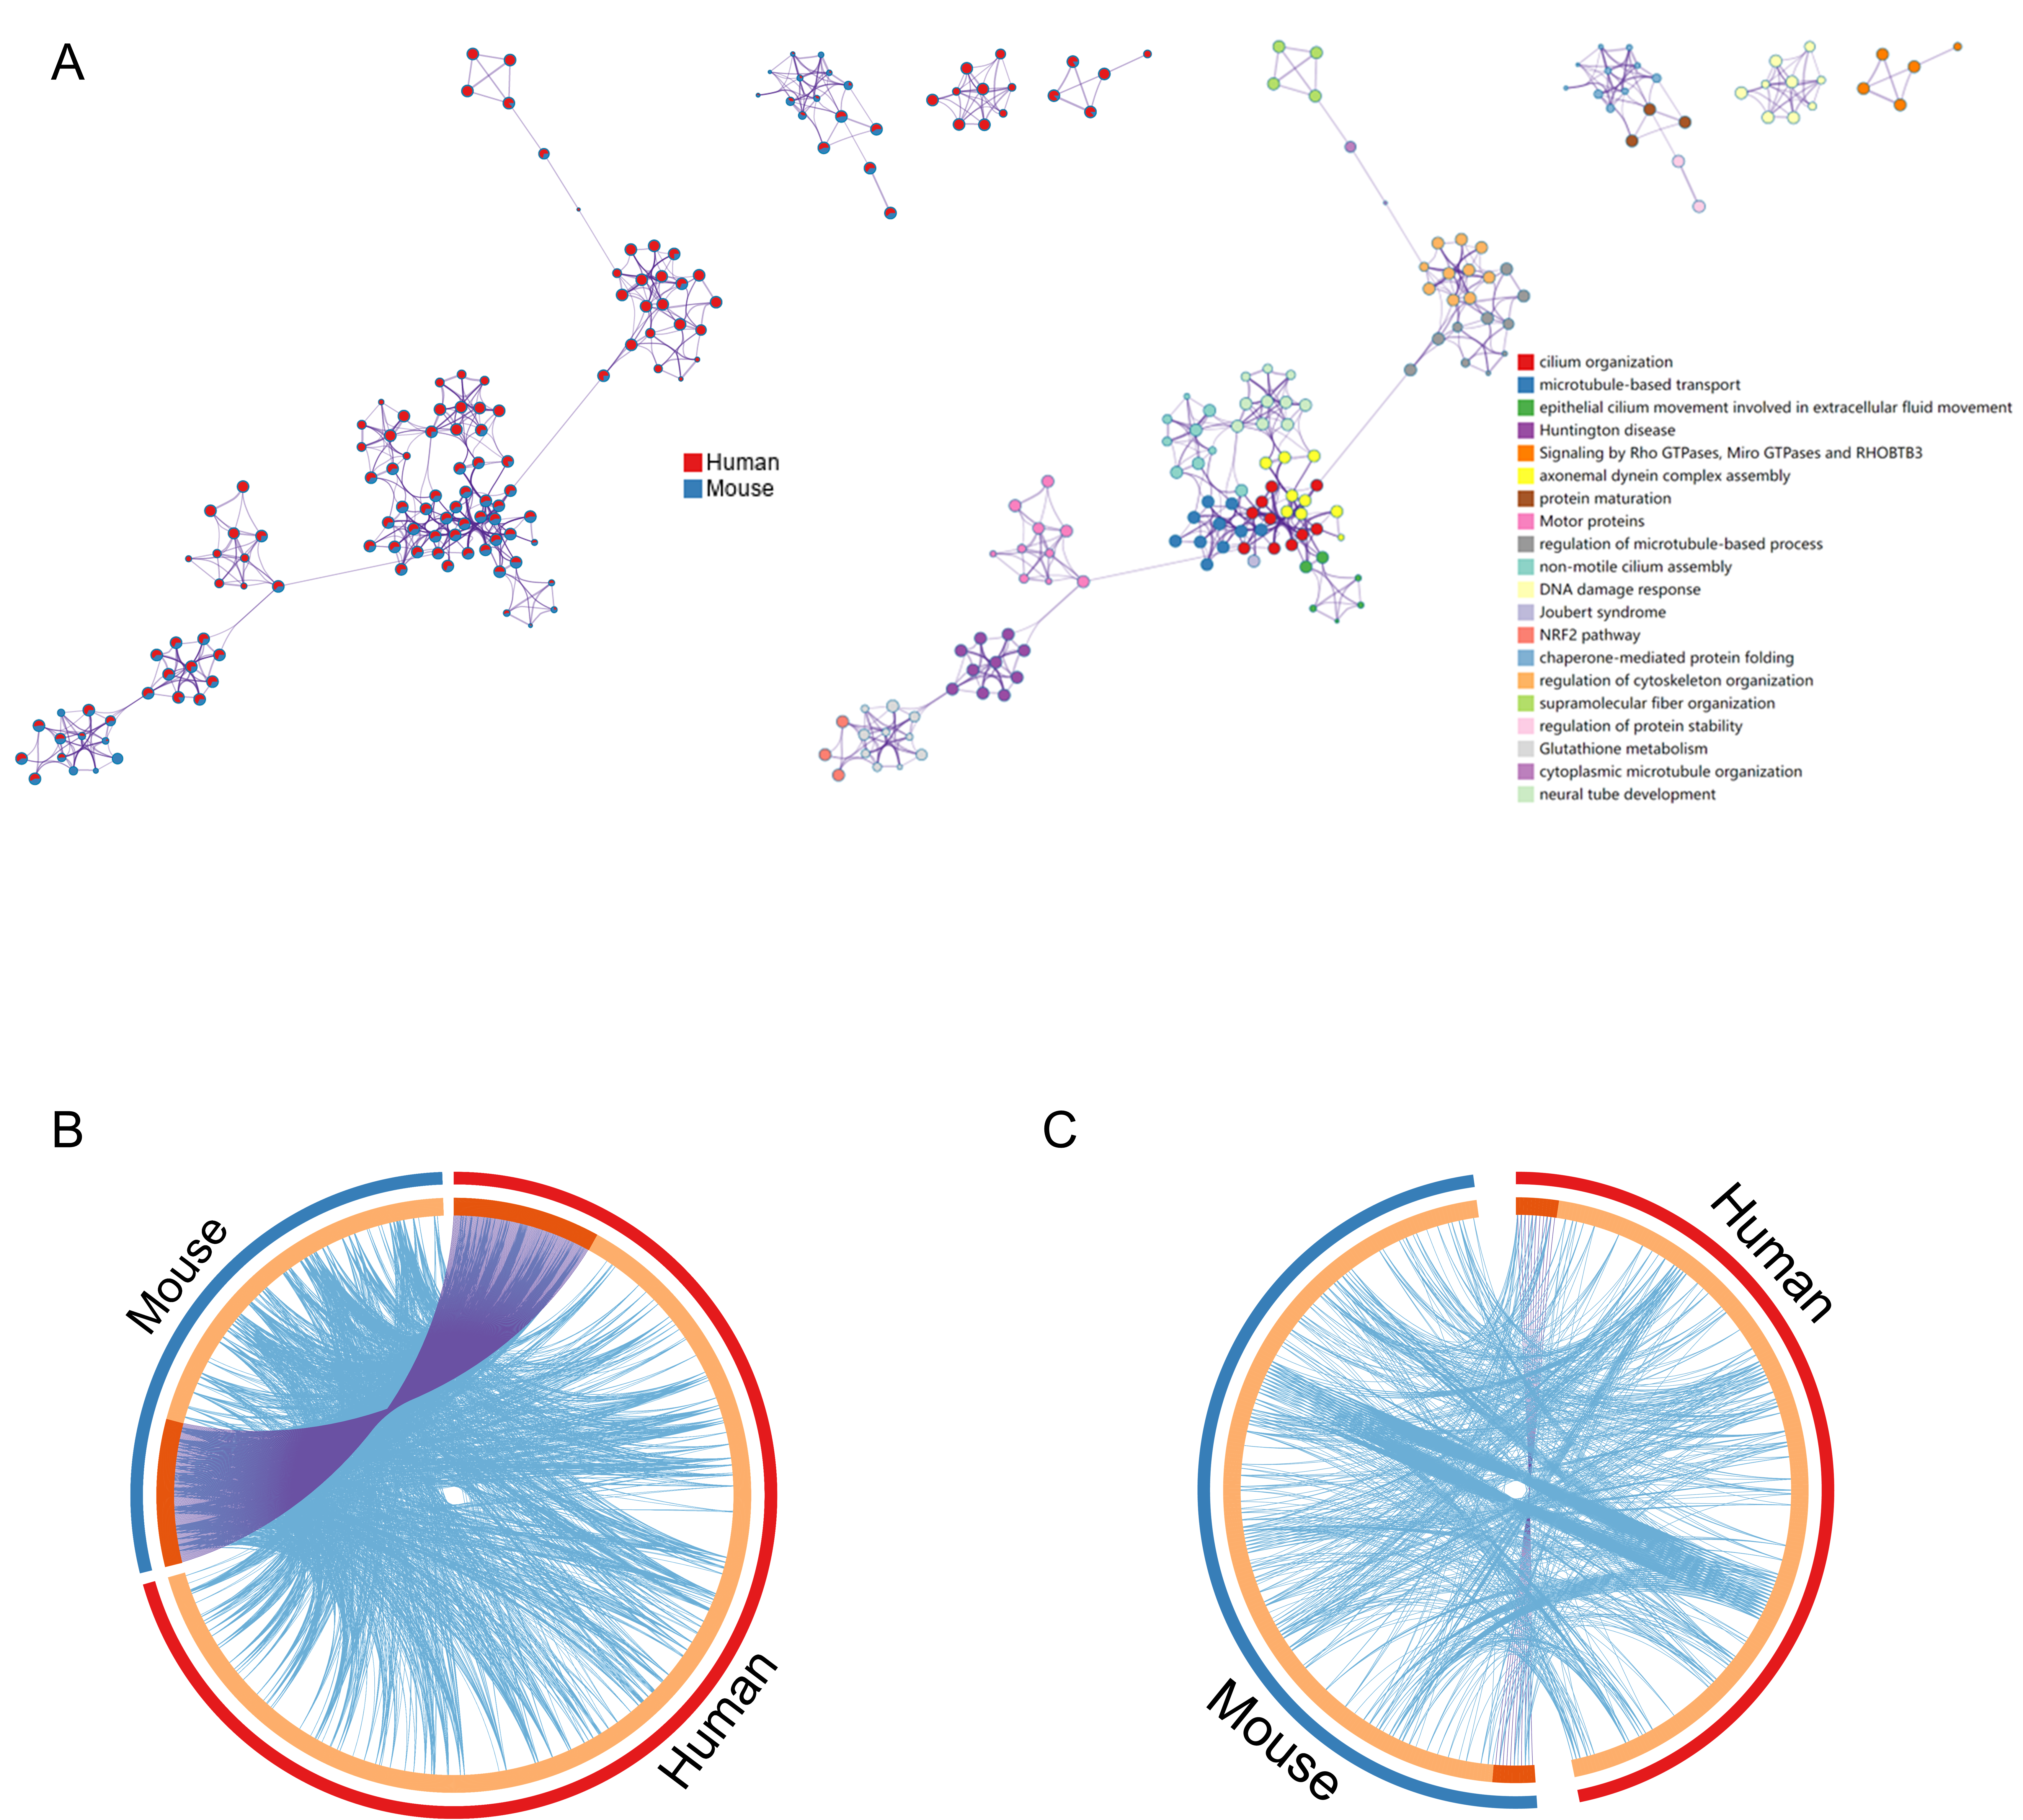


**Supplementary Figure 15**

**A** PPI networks were constructed by significantly up-regulated genes in human and mouse TIMP4 ciliated cells.

**B-C** The Circos plot illustrates the overlap of genes from the input gene lists, highlighting significantly upregulated and downregulated genes in both humans and mice. On the outside, each arc represents the identity of a gene list. On the inside, each arc also represents a gene list, with each gene assigned a spot on the arc. Dark orange indicates genes shared by multiple lists, while light orange denotes genes unique to a single list. Purple lines connect identical genes shared across multiple lists, and blue lines link different genes that fall under the same ontology term.


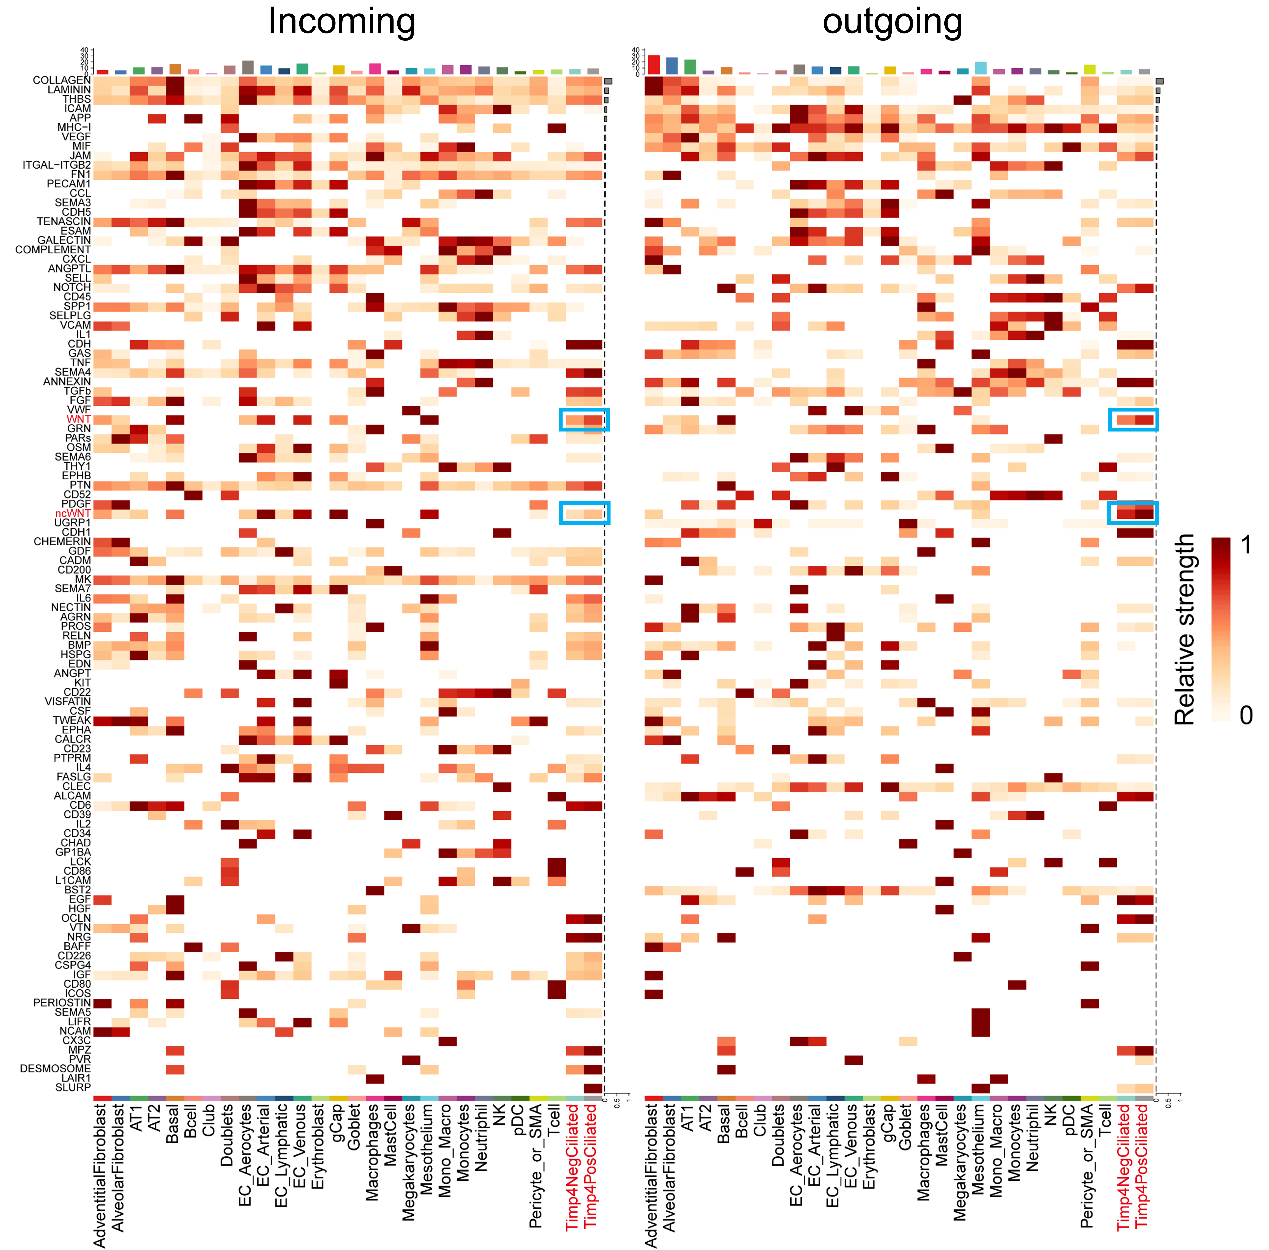


**Supplementary Figure 16**

Intercellular interactions among various cell types within TIMP4-positive and TIMP4-negative ciliated cells from the GSE168299 dataset. Red text denotes TIMP4-positive and TIMP4-negative ciliated cells, while blue boxes indicate *Wnt* and *ncWnt* pathways.


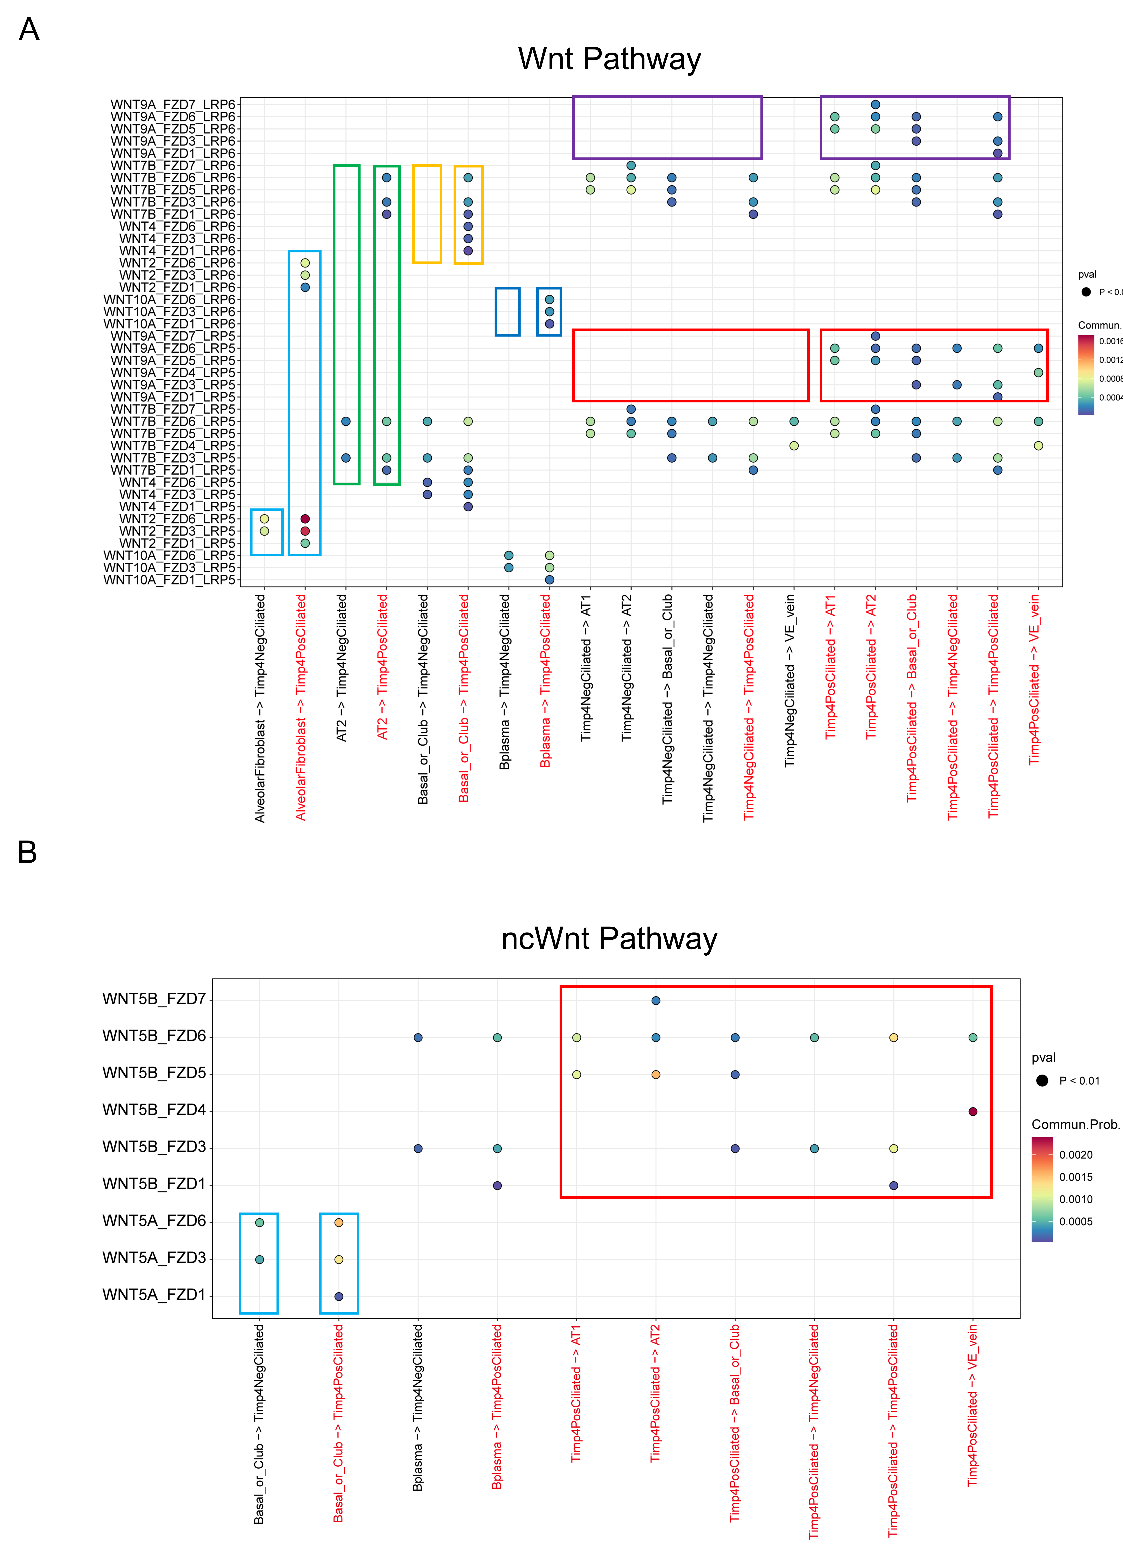


**Supplementary Figure 17**

The bubble chart visualizes cell-to-cell interactions involving TIMP4-positive ciliated cells or TIMP4-negative ciliated cells with other cell types within the *Wnt* or *ncWnt* pathways from the GSE173896 dataset. Darker colors represent stronger interactions. Each color-coded box compares the strength of the same ligand-receptor interactions between TIMP4-positive and TIMP4-negative ciliated cells.


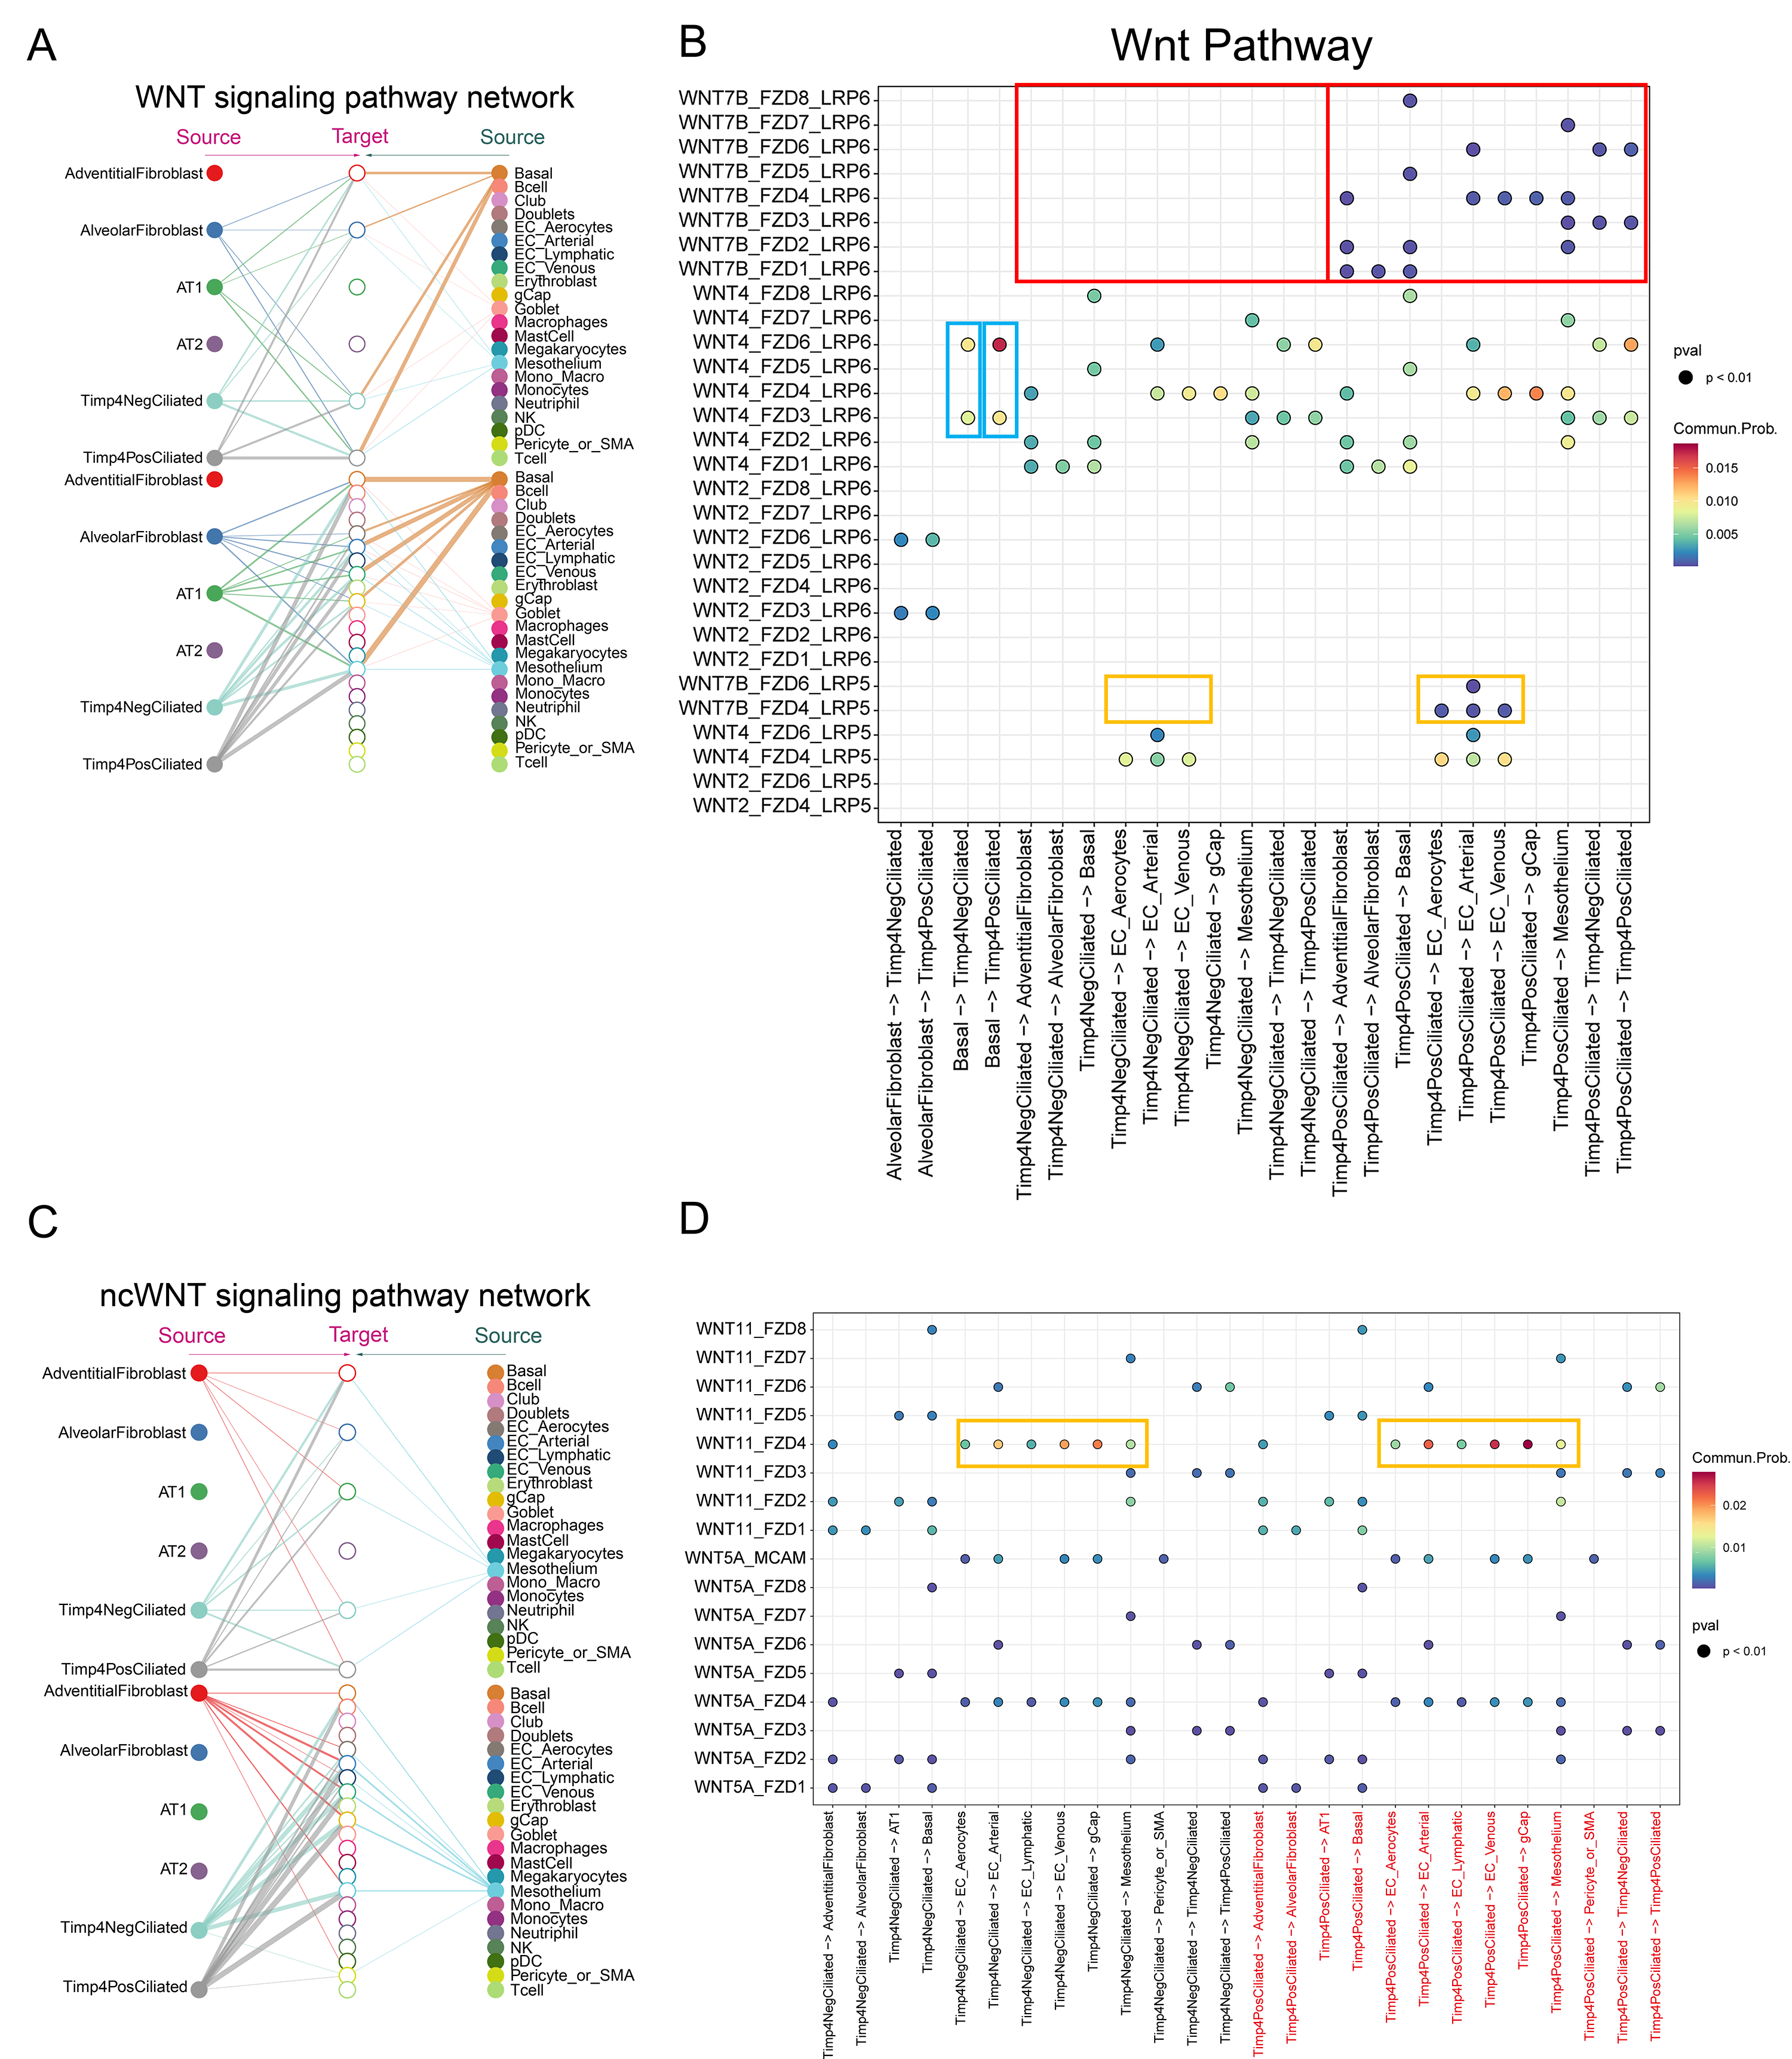


**Supplementary Figure 18**

A Comparison of *WNT* signaling pathway network interactions between TIMP4-positive and TIMP4-negative ciliated cells and other cell subpopulations in GSE168299.

B The bubble chart visualizes cell-to-cell interactions involving TIMP4-positive ciliated cells or TIMP4-negative ciliated cells with other cell types within the *Wnt* pathway from the GSE168299 dataset. Darker colors represent stronger interactions. Each color-coded box compares the strength of the same ligand-receptor interactions between TIMP4-positive and TIMP4-negative ciliated cells.

C Comparison of *ncWNT* signaling pathway network interactions between TIMP4-positive and TIMP4-negative ciliated cells and other cell subpopulations in GSE168299.

D The bubble chart visualizes cell-to-cell interactions involving TIMP4-positive ciliated cells or TIMP4-negative ciliated cells with other cell types within the *ncWnt* pathways from the GSE168299 dataset. Darker colors represent stronger interactions. Each color-coded box compares the strength of the same ligand-receptor interactions between TIMP4-positive and TIMP4-negative ciliated cells.


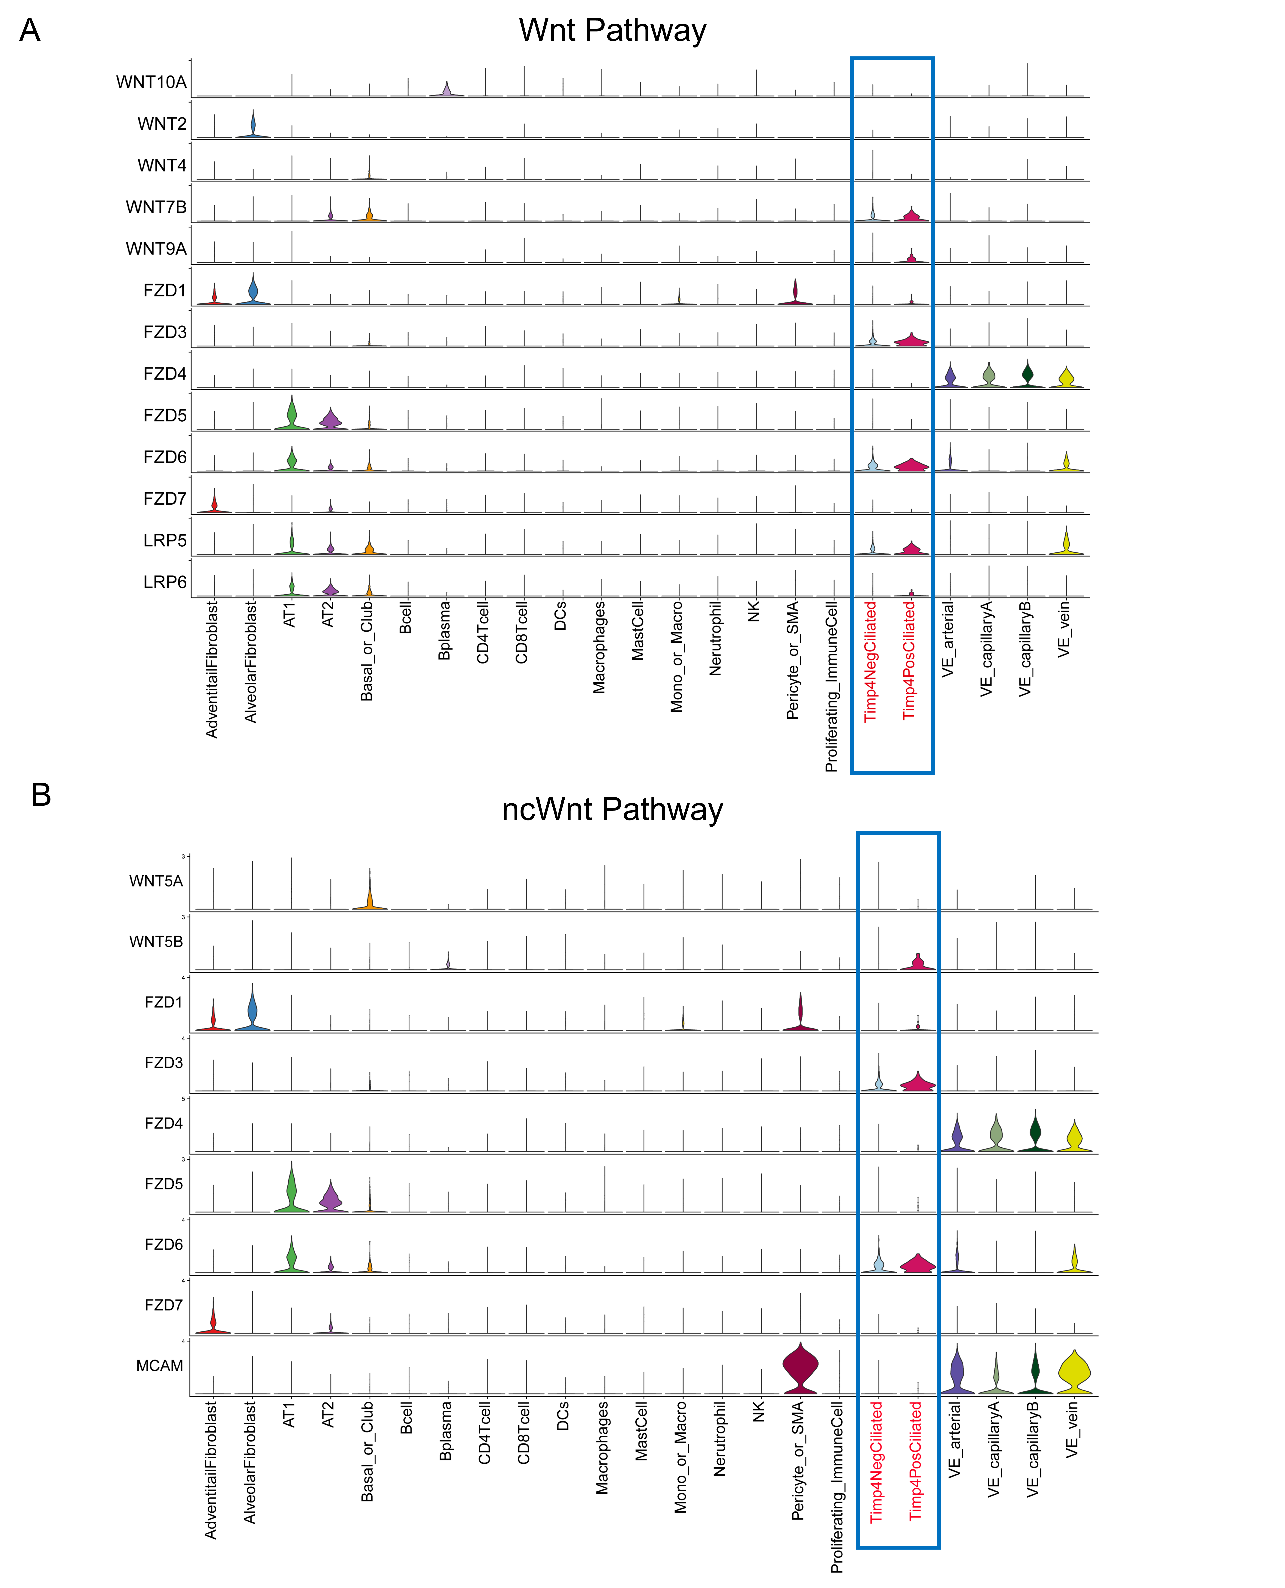


**Supplementary Figure 19**

The violin plot illustrates the expression distribution of *Wnt* and *ncWnt* pathway ligands and receptors across all cell subsets in GSE173896, including TIMP4-positive and TIMP4-negative ciliated cells. Red text and blue boxes indicate TIMP4-positive and TIMP4-negative ciliated cells.


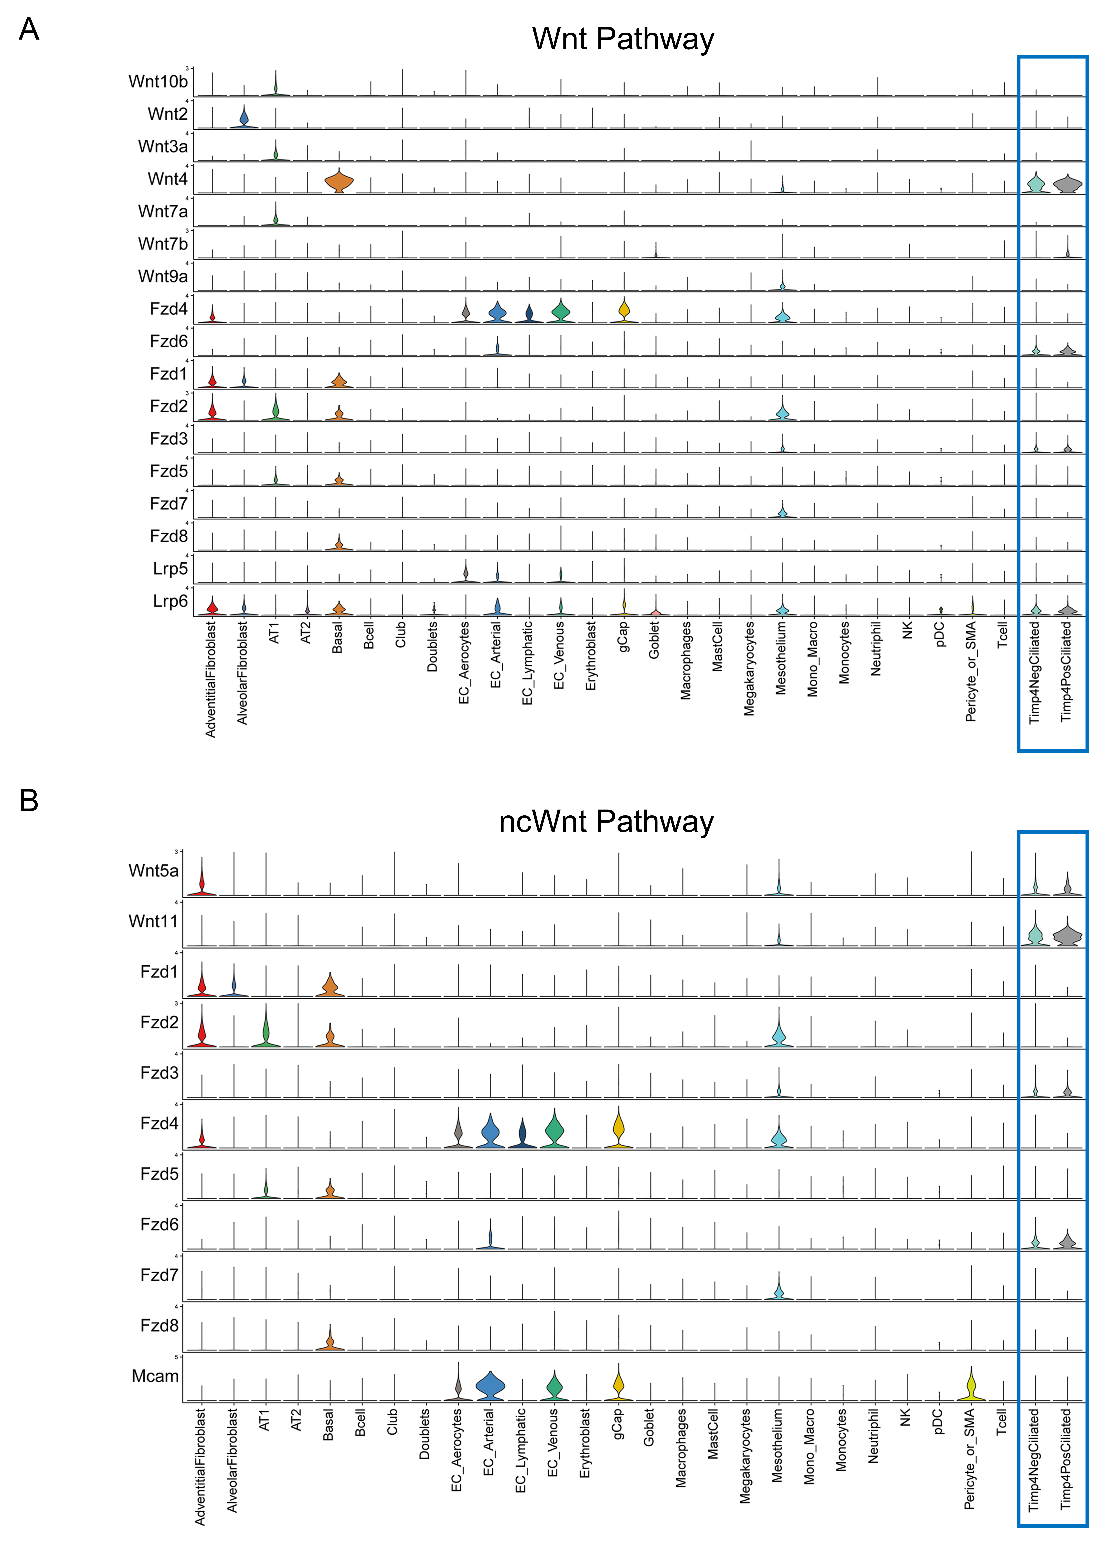


**Supplementary Figure 20**

The violin plot illustrates the expression distribution of *Wnt* and *ncWnt* pathway ligands and receptors across all cell subsets in GSE168299, including TIMP4-positive and TIMP4-negative ciliated cells. Red text and blue boxes indicate TIMP4-positive and TIMP4-negative ciliated cells.


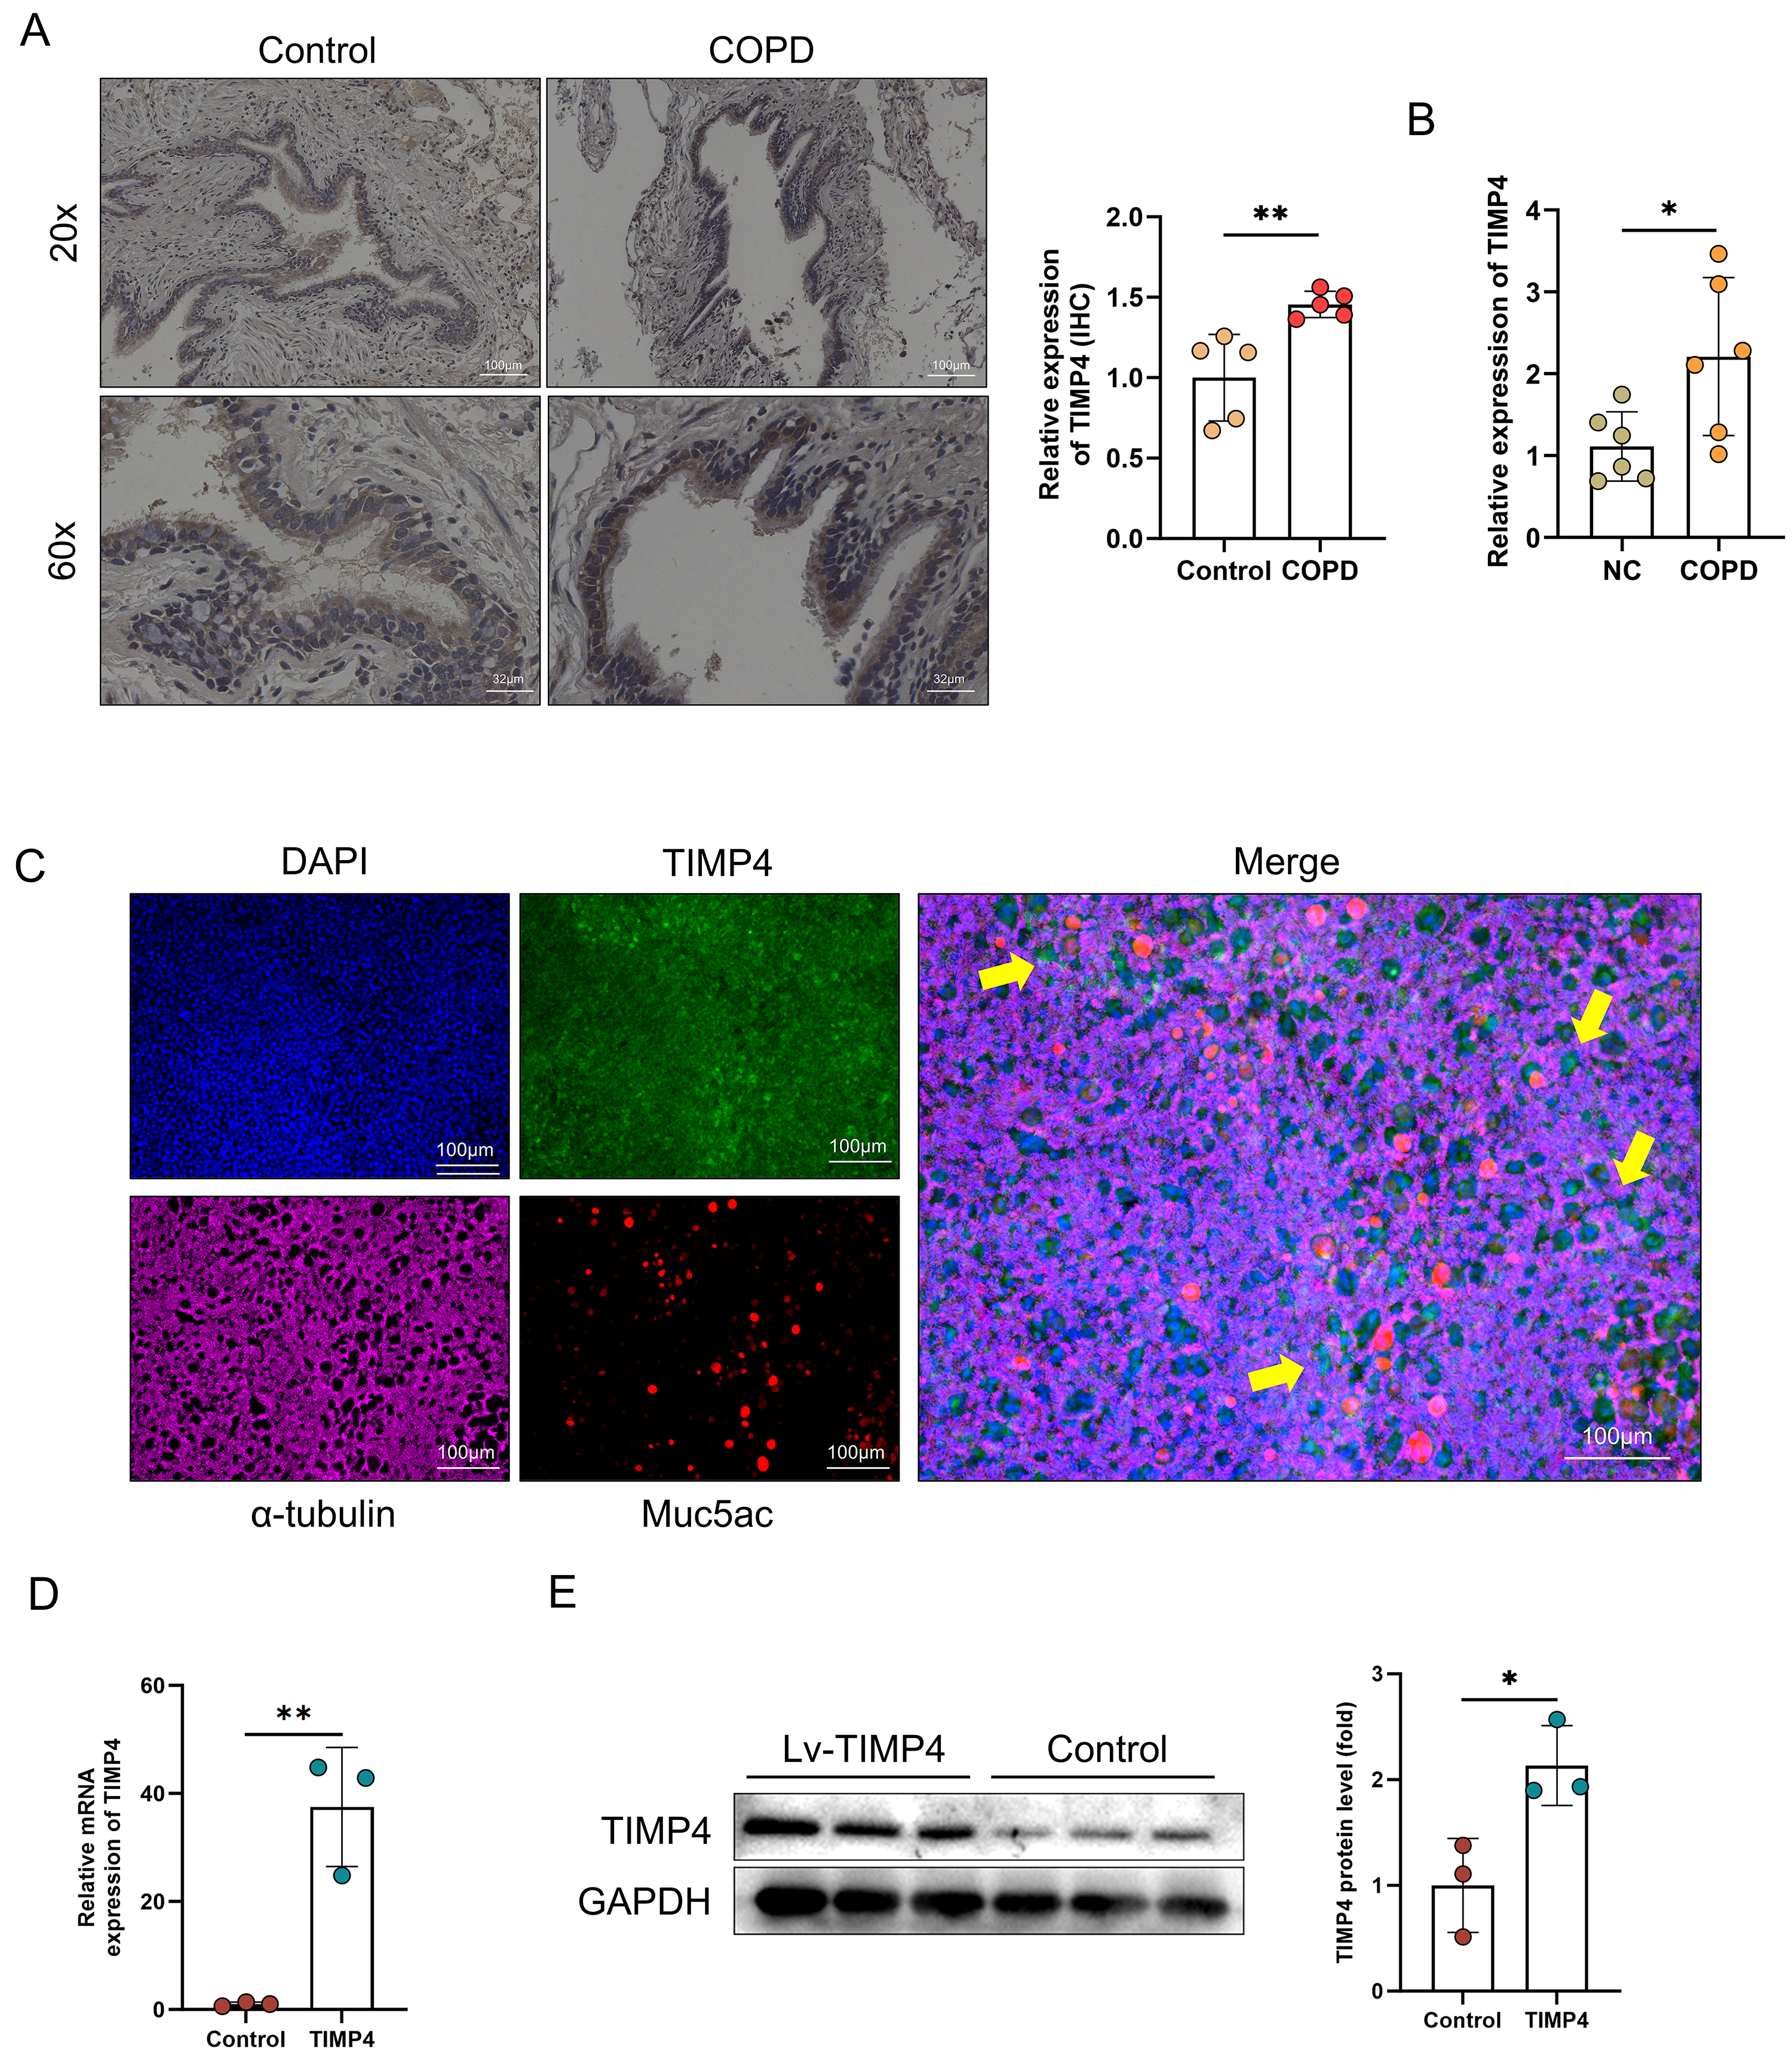


**Supplementary Figure 21**

**A** IHC staining of TIMP4 in lung tissue sections from COPD patients and control subjects. (n=5)

**B** Expression levels of TIMP4 in bronchial brush cells from COPD patients and control subjects. (n=5)

**C** Multiplex immunofluorescence staining of human airway epithelial cells cultured at the ALI. Green: TIMP4; purple: α-tubulin; red: Muc5ac. Blue: DAPI.

**D** Overexpression efficiency of TIMP4 in epithelial cells at ALI (RNA level). (n=3)

**E** Overexpression efficiency of TIMP4 in epithelial cells at ALI (protein level). (n=3)

Data are expressed as mean ± SD. P values shown in charts determined by two-tailed Student's t-test (A, B, D, E).


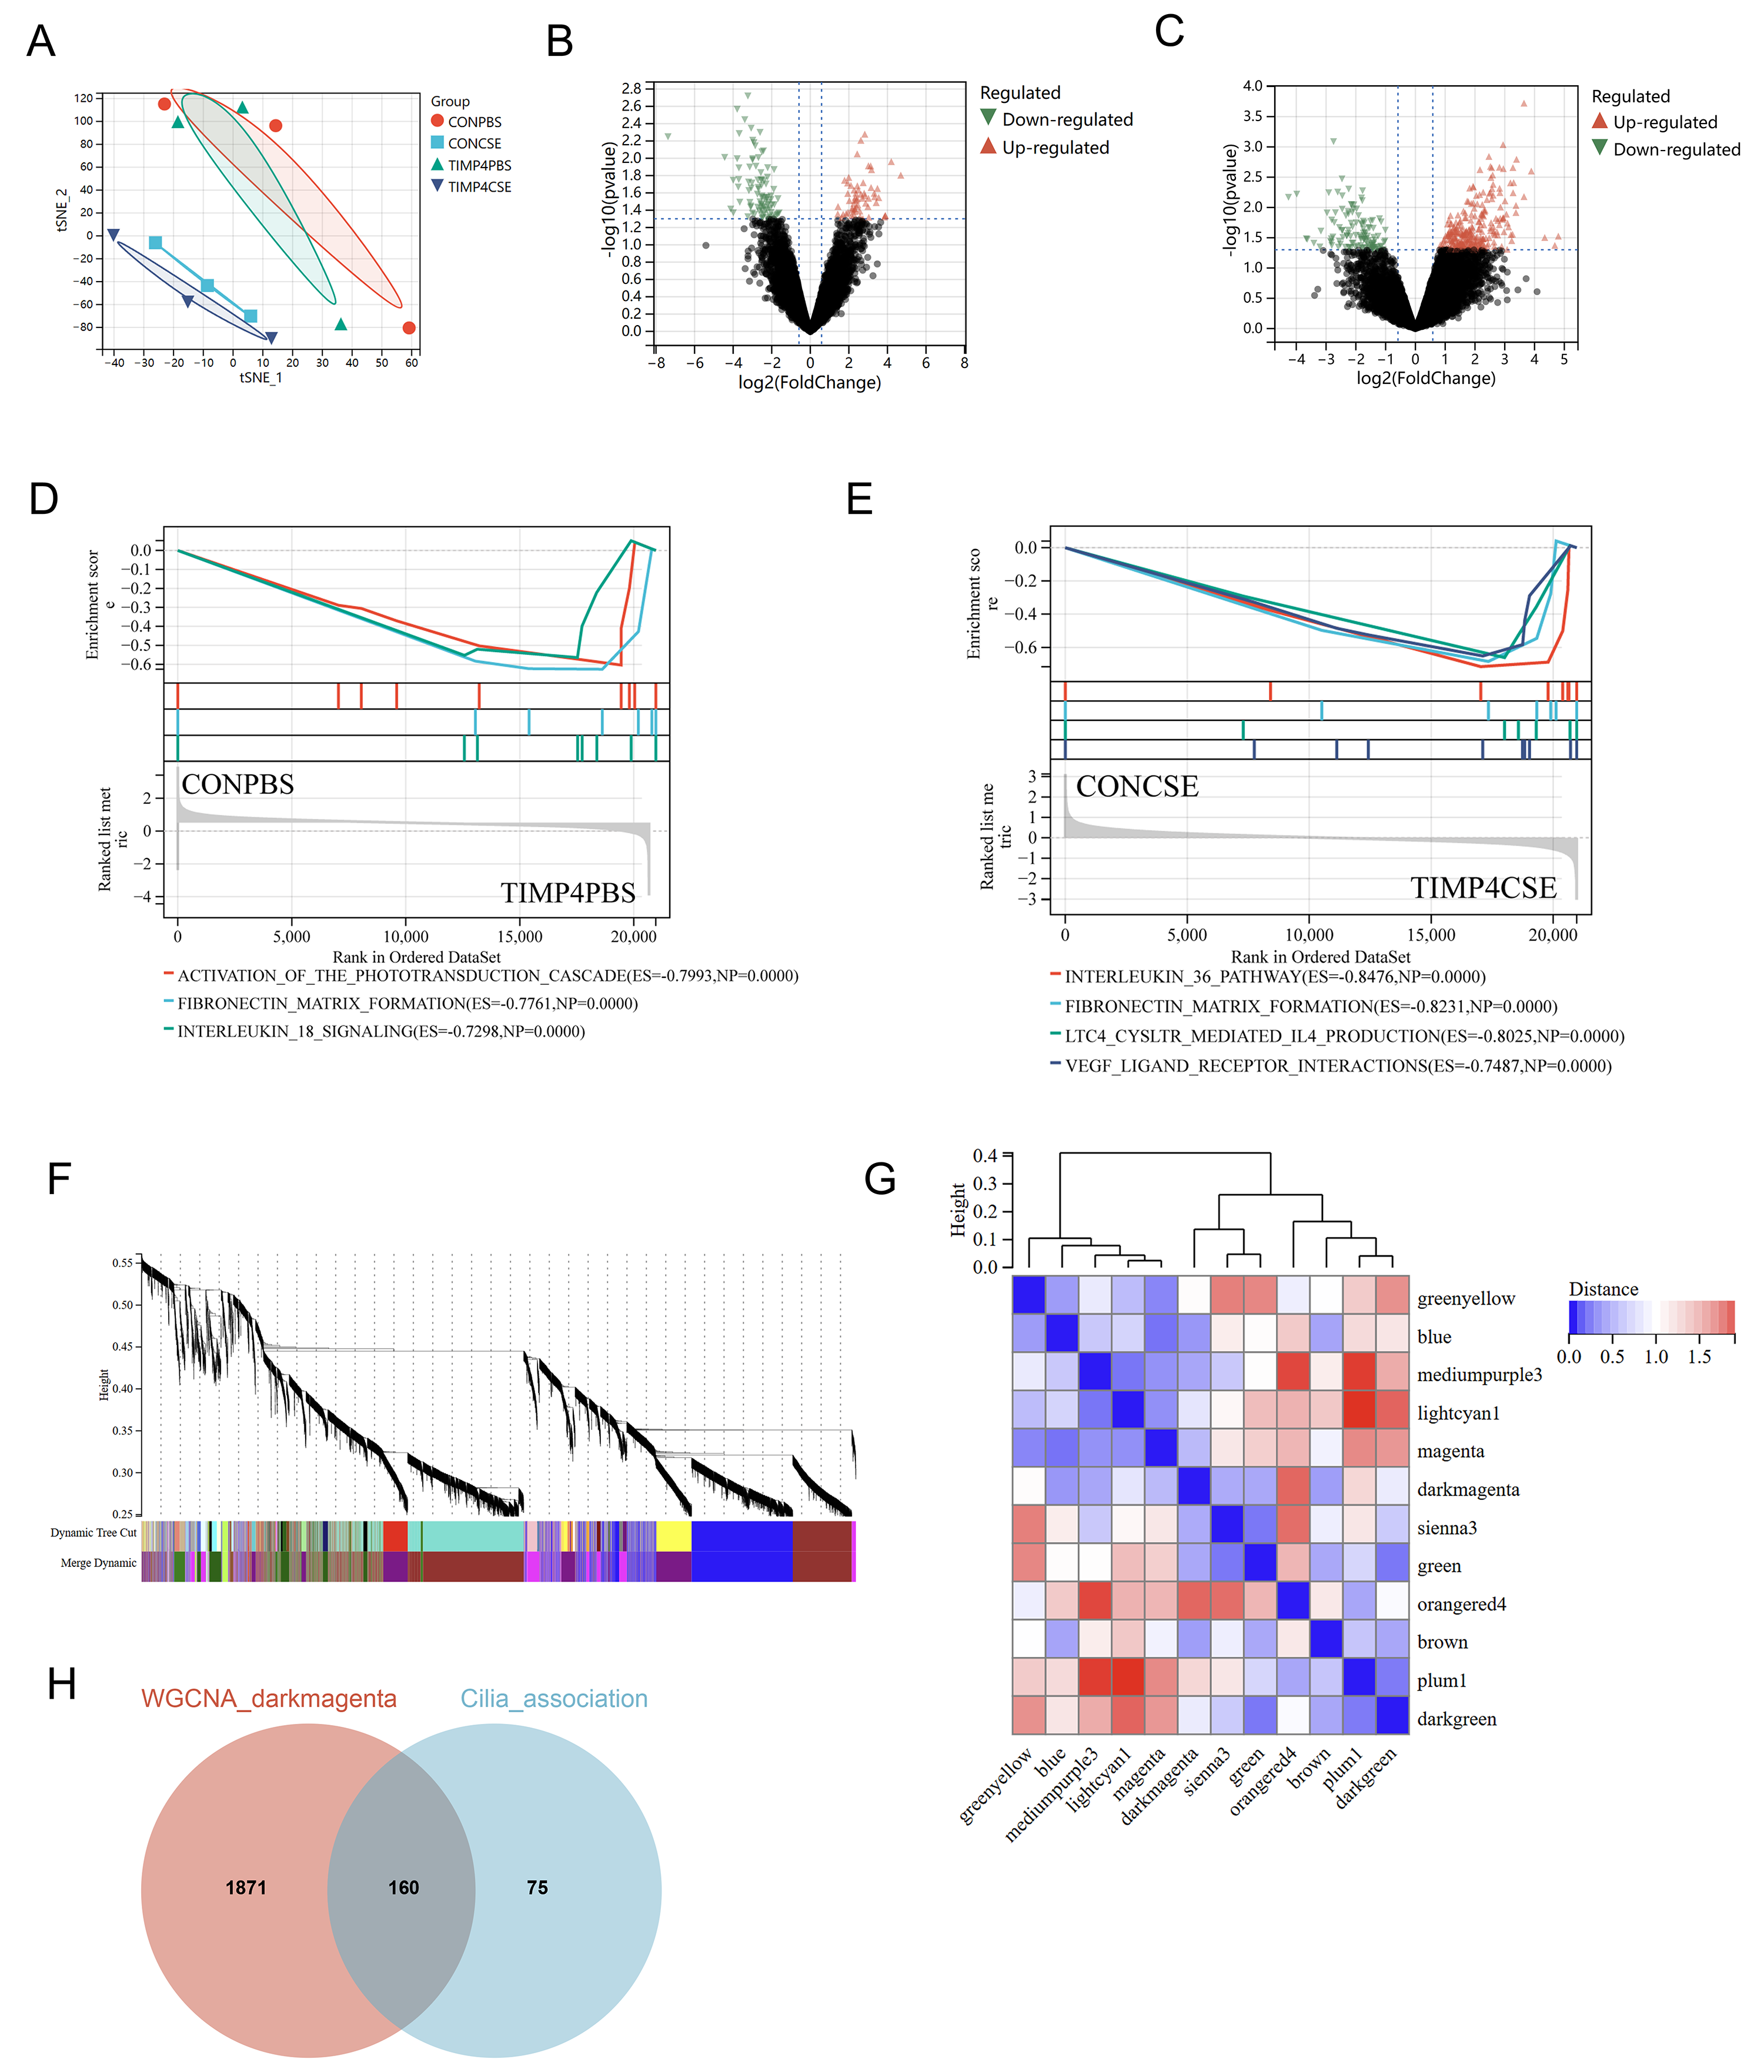


**Supplementary Figure 22**

**A** The PCA plot shows the distribution of four sample groups: CON_PBS, CON_CSE, TIMP4_PBS, and TIMP4_CSE.

**B-C** The volcano plots illustrate the differentially expressed genes between the TIMP4 overexpression group and the TIMP4 control group in the PBS group (B) and the CSE group (C), respectively.

**D-E** GSEA was conducted on epithelial cells cultured at the ALI, comparing CON_PBS vs. TIMP4_PBS (D) and CON_CSE vs. TIMP4_CSE (E).

**F-G** Gene clustering dendrogram with module colors (D) and Module eigengene clustering dendrogram (E) in RNA-seq.

**H** Venn diagram showing the overlap of genes in the dark magenta module with cilia-related genes.


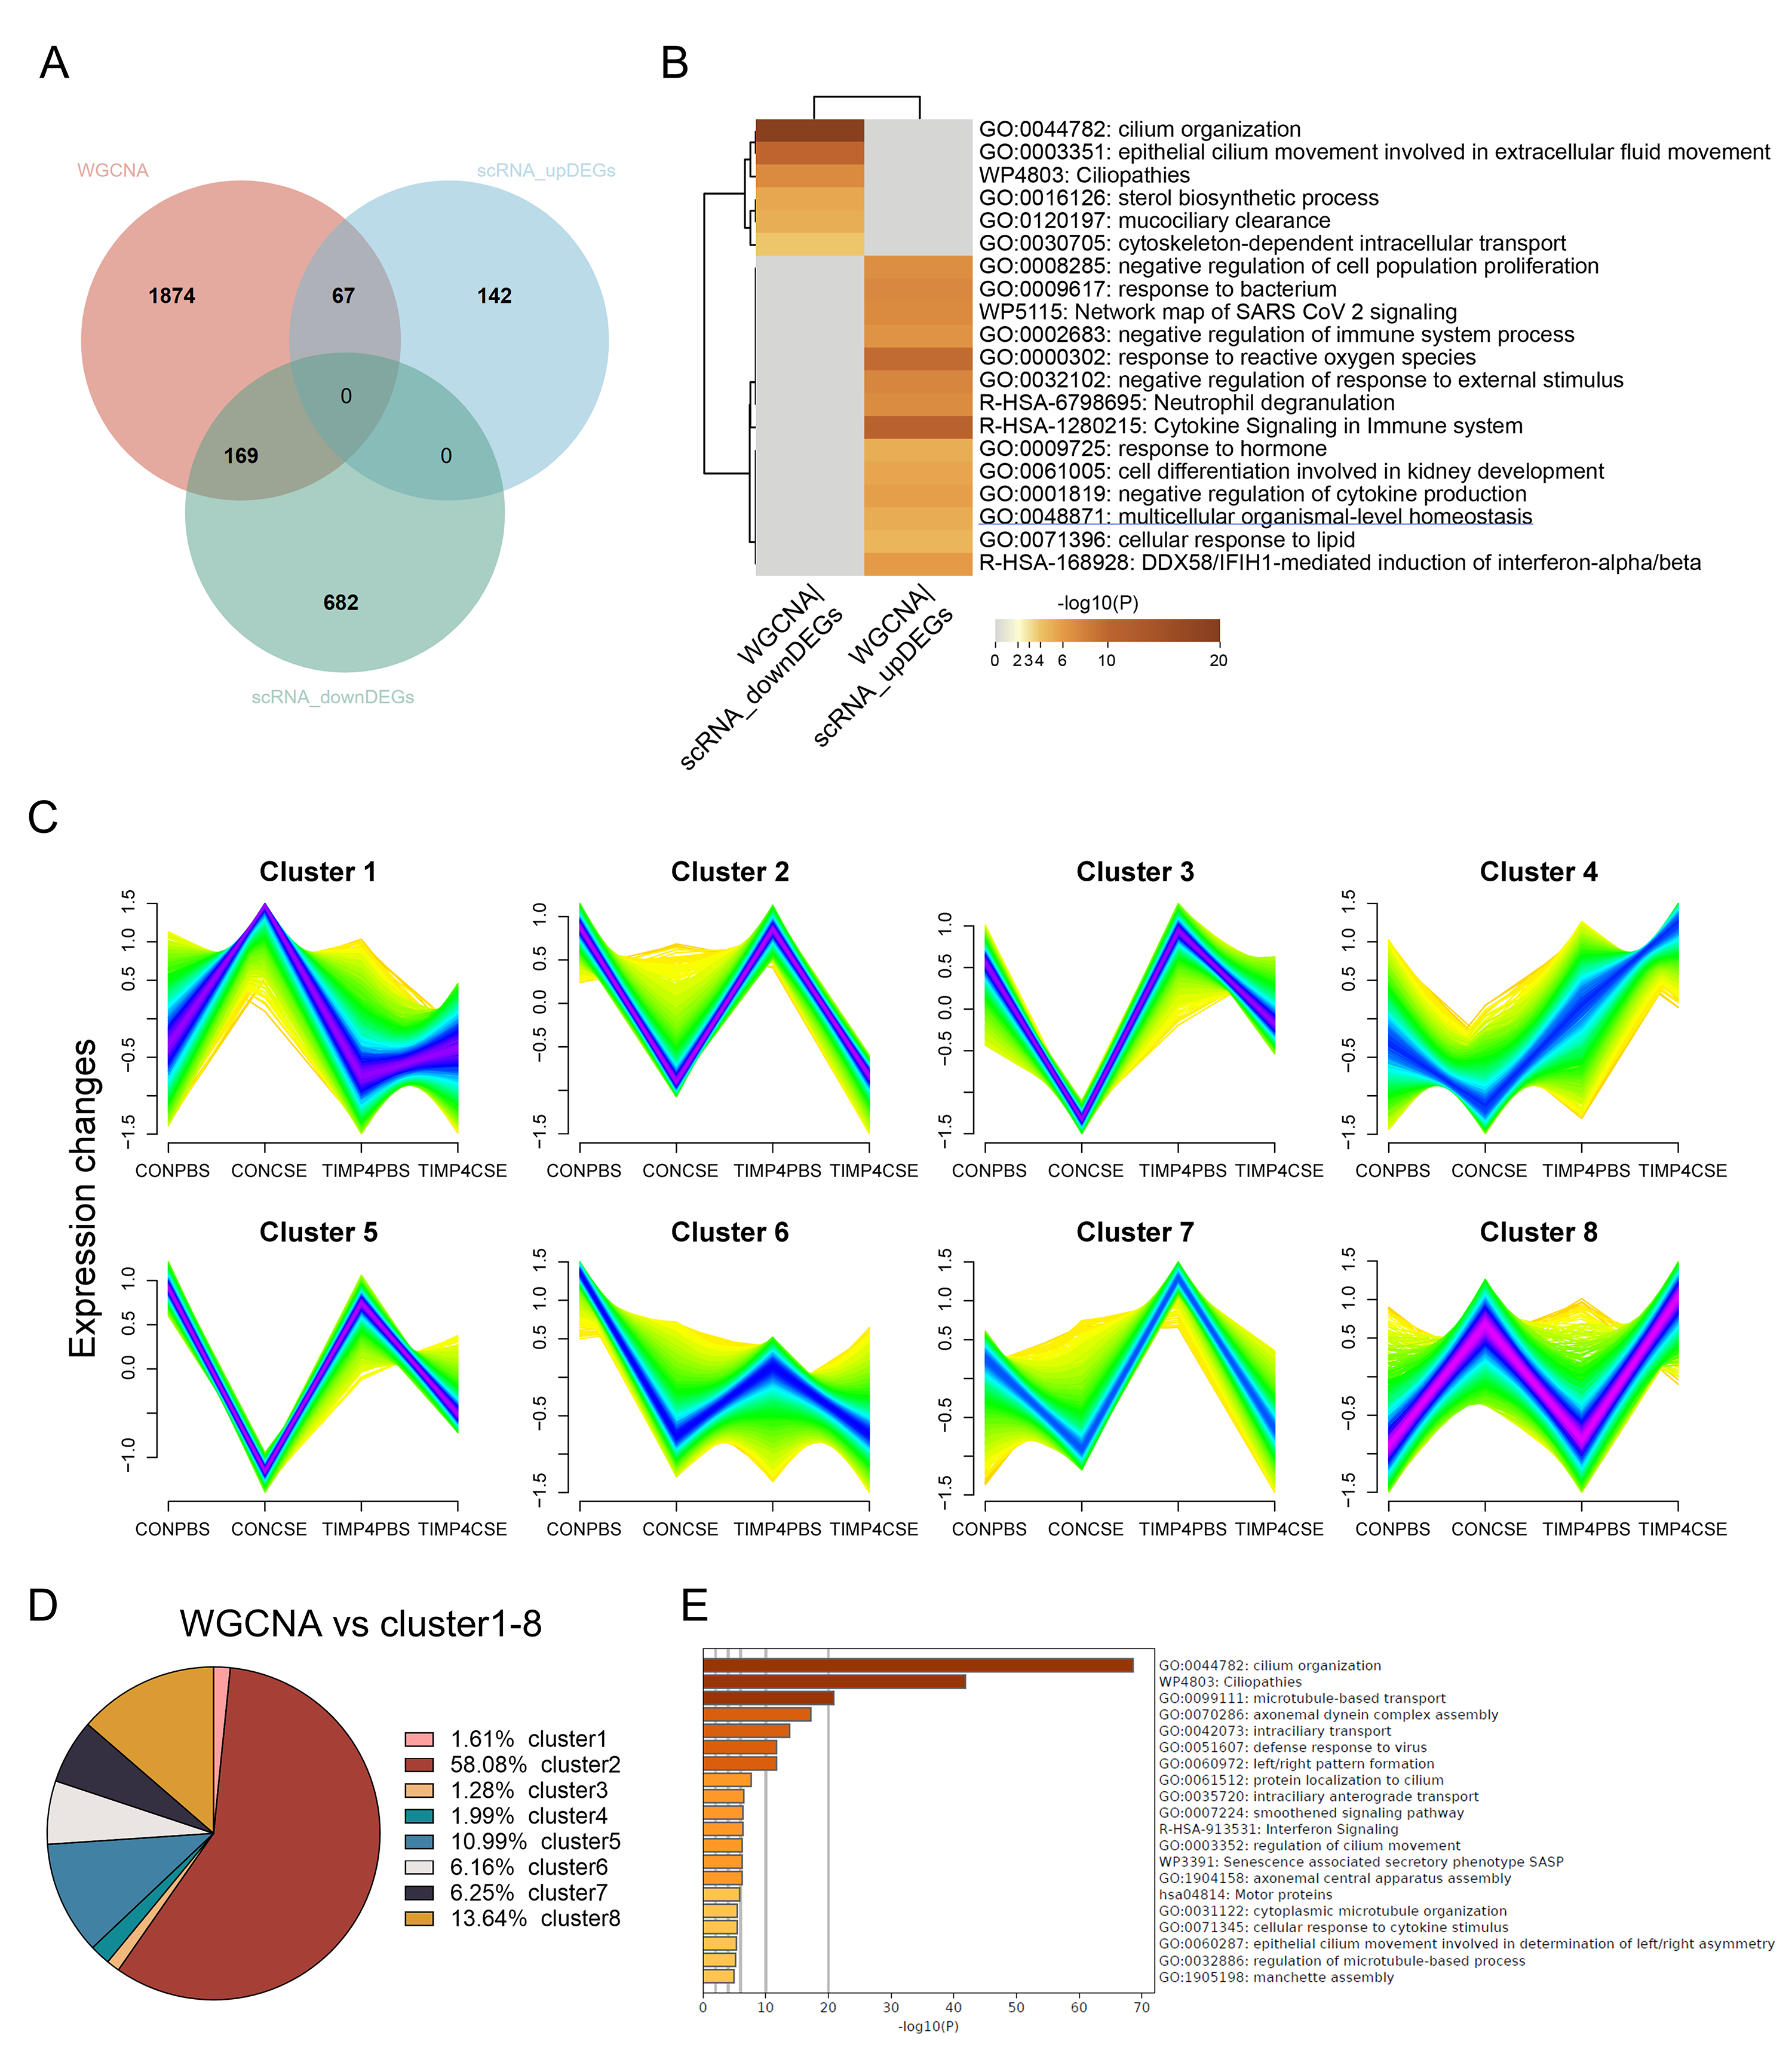


**Supplementary Figure 23**

A Venn diagram illustrating the overlap between genes in the dark magenta module and the significantly upregulated or downregulated genes in ciliated cells of COPD patients from GSE173896.

B Enrichment analysis of overlapping upregulated and downregulated genes using Metascape.

C RNA sequencing data were classified into 8 clusters based on the trends of gene expression changes between groups using *Mfuzz*.

D Proportion of each gene from the significantly associated WGCNA modules in each cluster of the *Mfuzz* analysis.

E Enrichment results of the intersecting genes between WGCNA and Cluster 2 using Metascape.


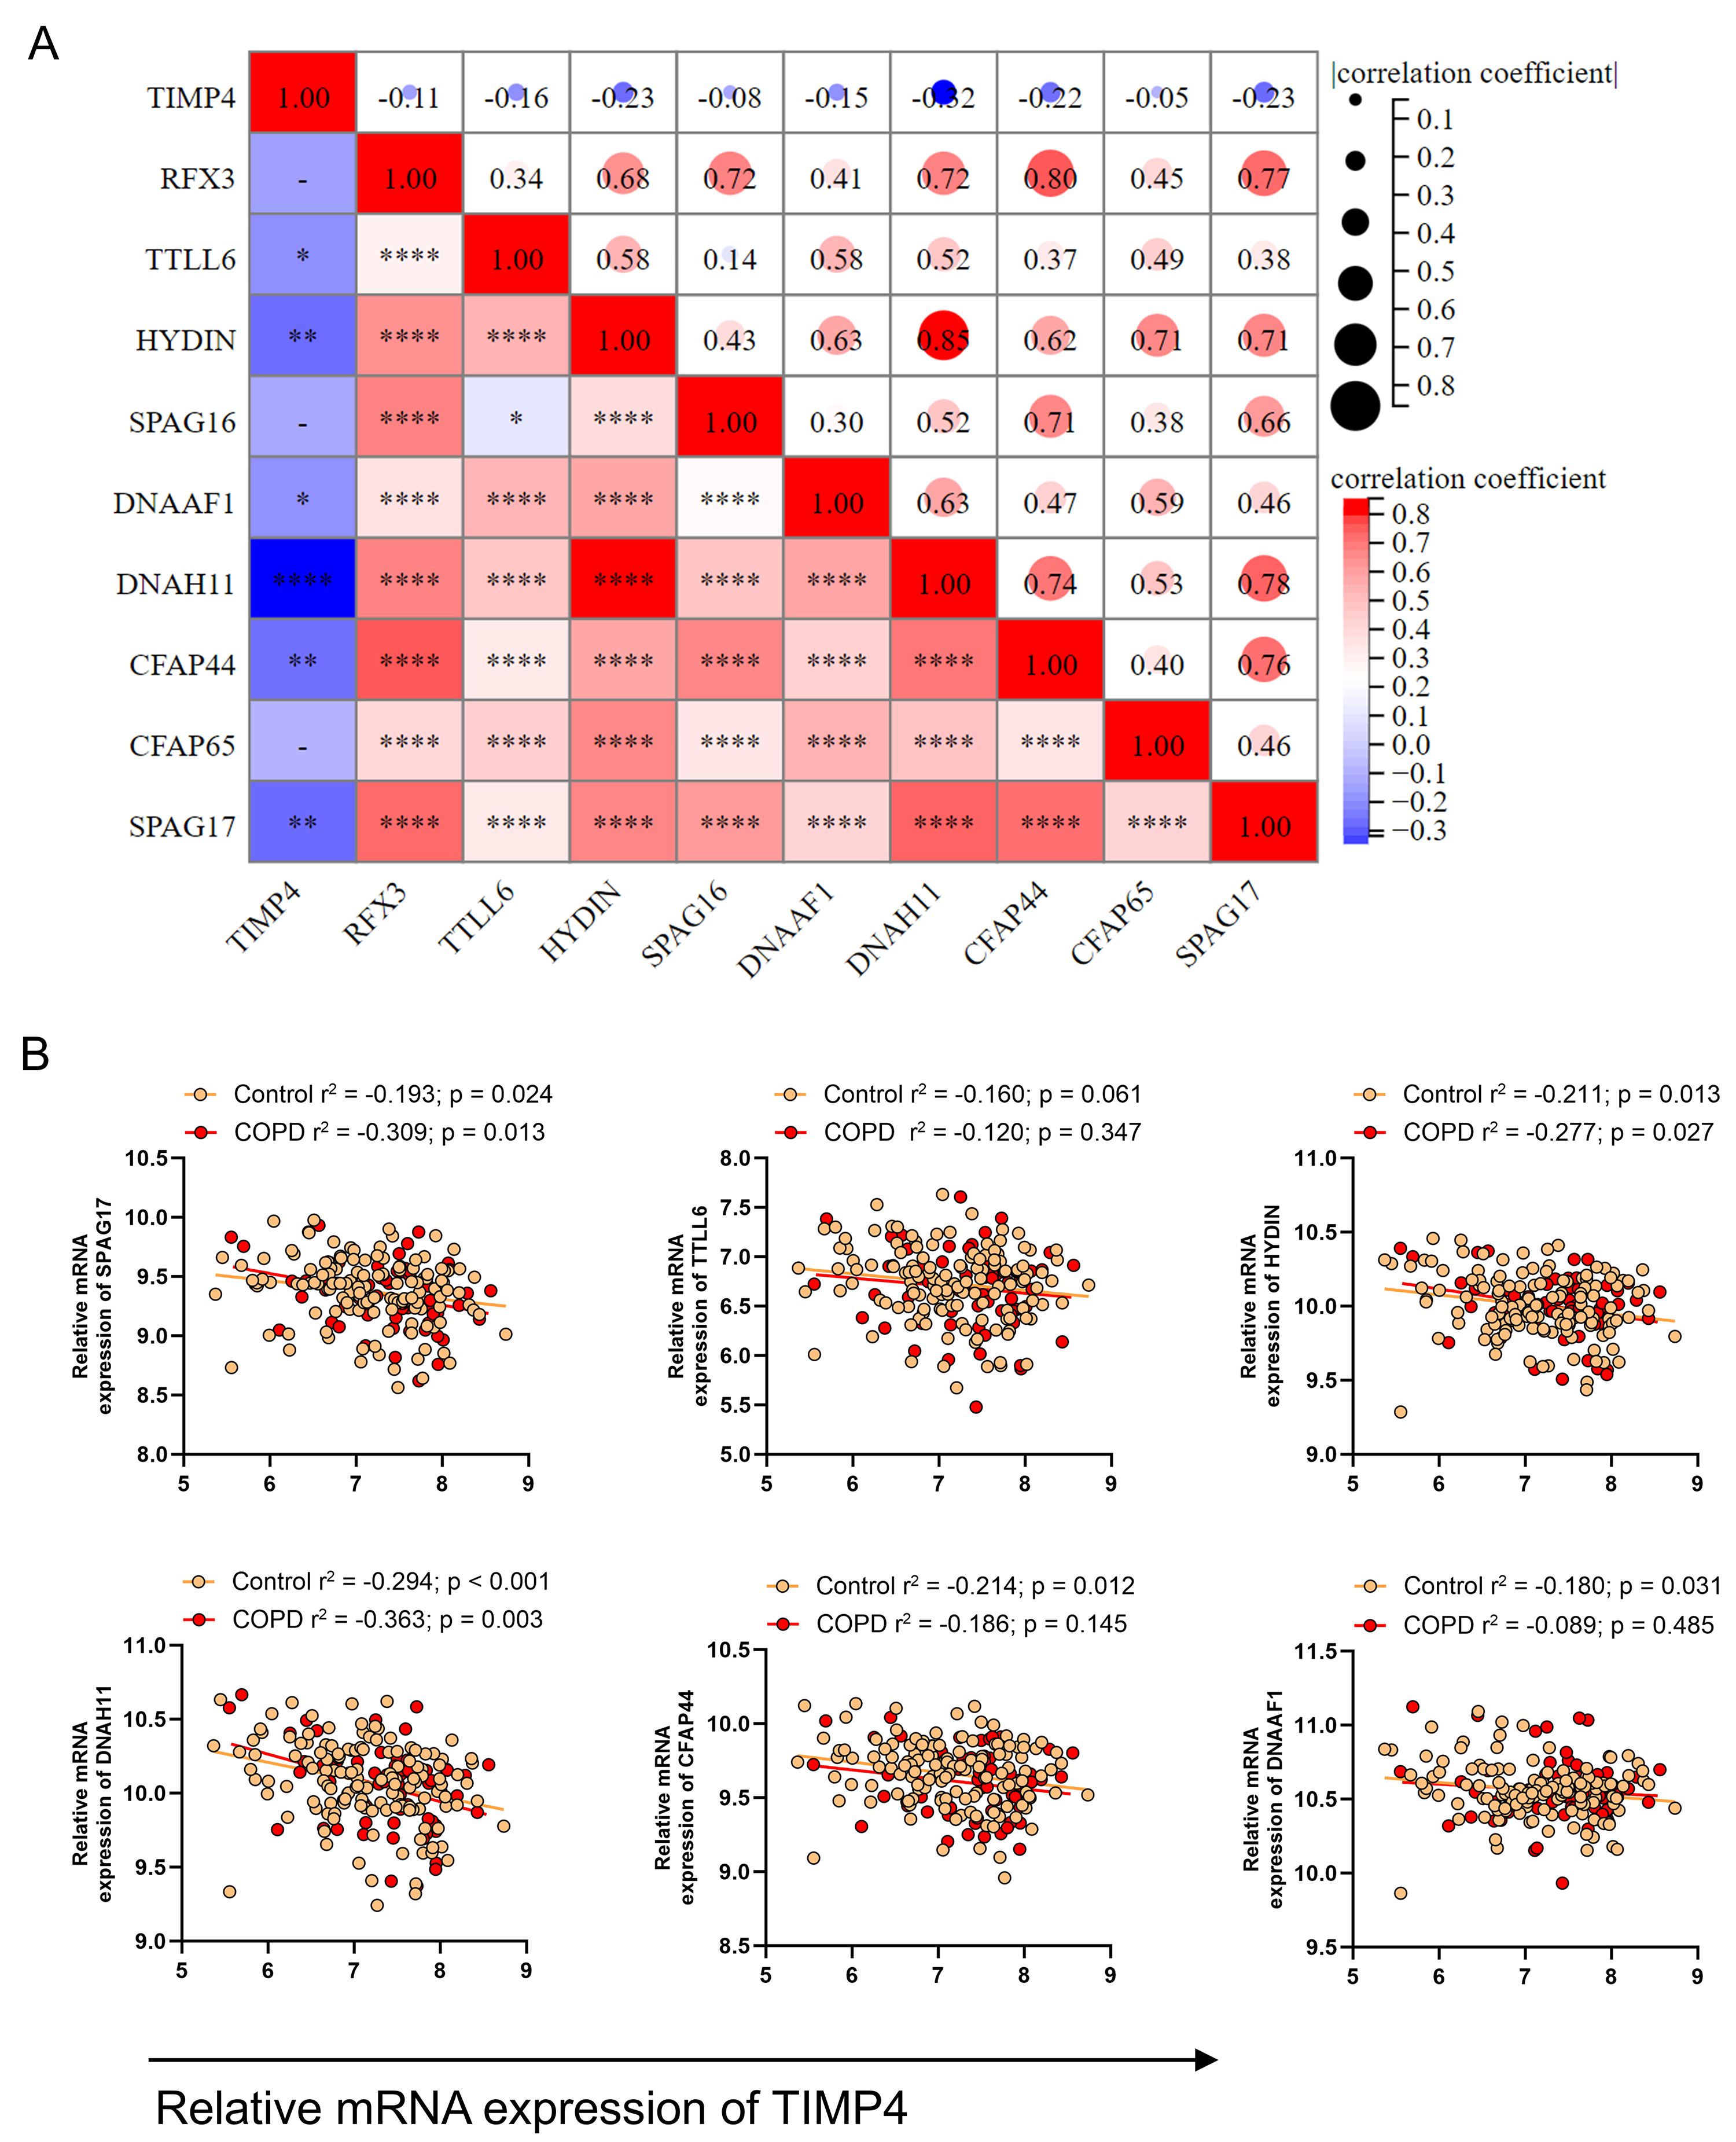


**Supplementary Figure 24**

A Analysis of the expression correlation between TIMP4 and cilia-related genes in bronchial brush samples from GSE37147.

B Correlation analysis of TIMP4 with SPAG17, TTLL6, HYDIN, DNAH11, CFAP44, and DNAAF1 in both the Control and COPD groups in GSE37147.

P values shown in charts determined by *Pearson* correlation two-tailed (A-B). **p* < 0.05, ***p* < 0.01, ****p* < 0.001 and *****p* < 0.0001.


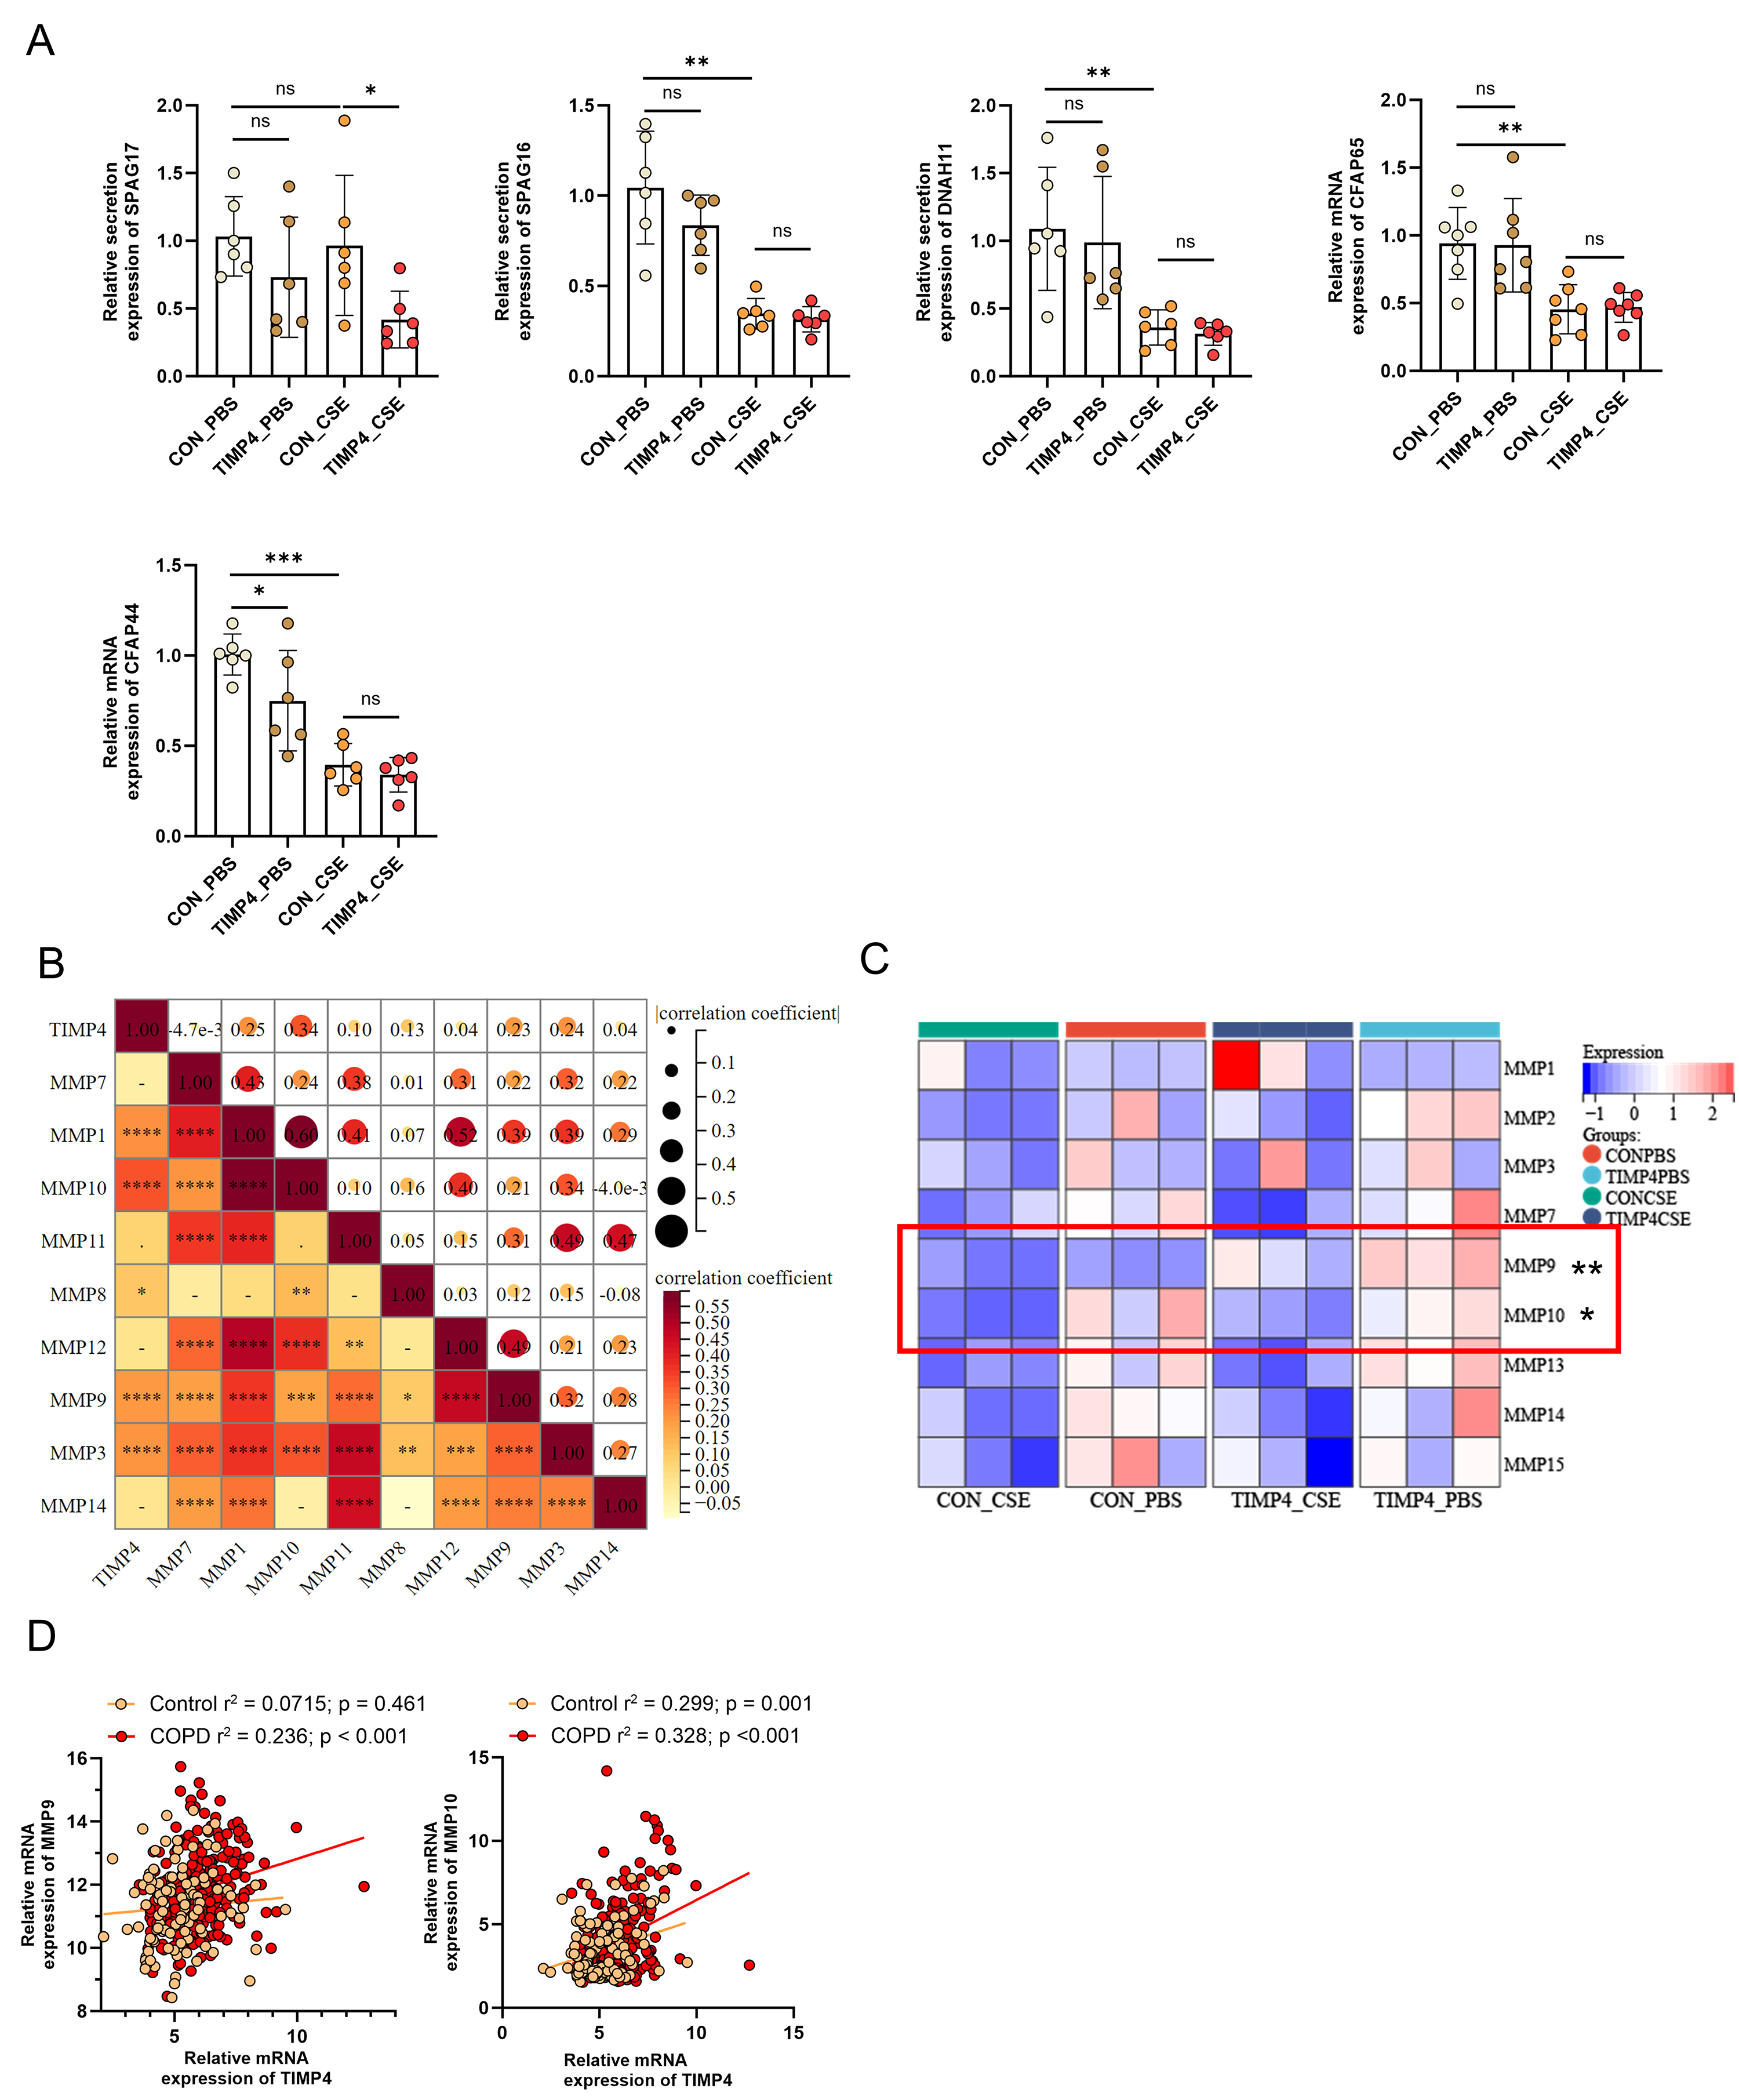


**Supplementary Figure 25**

**A** qRT-PCR analysis of RNA levels of SPAG17, SPAG16, DNAH11, CFAP65, and CFAP44 in primary human cells cultured at the ALI across four groups. (n=5)

B Correlation analysis of TIMP4 with MMPs family in COPD patients from GSE47460.

C The heatmap illustrates the expression changes of the MMPs family in human airway epithelium at the ALI in RNA-seq.

D Correlation analysis of TIMP4 with MMP8 and MMP9 in both the Control and COPD groups in GSE37147.

Data are expressed as mean ± SD. P values shown in charts determined by one way A-NOVA (A), two-tailed Student's t-test (C) and Pearson Correlation two-tailed (B, D). **p* < 0.05, ***p* < 0.01, ****p* < 0.001 and *****p* < 0.0001.
