# Supplementary material for: An integrated machine learning model of transcriptomic genes in multi-center chronic obstructive pulmonary disease reveals the causal role of TIMP4 in airway epithelial cell
Source: Research Square preprint supplement (doi:10.21203/rs.3.rs-5739006/v1), 2025-04-10
Supplement: Supplementary file 2 [file c887206b52401883a3c37362.xlsx]

## Sheet: Supplementary Data 1
	Supplemental Data 1 Gene modules significantly associated with COPD and lung function in GSE47460
	Negative_genes	Negative_Module	Positive_gene	Positive_Module
	A1BG-AS1	brown	AADACL2	pink
	A4GNT	blue	ABCB1	pink
	AADAC	magenta	ABCG4	pink
	AATK	brown	ACAN	pink
	ABCA3	magenta	ACBD4	black
	ABCA4	brown	ACER1	black
	ABCA6	tan	ACP4	black
	ABCA8	tan	ACTL6B	black
	ABCC13	magenta	ACTL7A	black
	ABCC4	magenta	ACTN3	pink
	ABCC5	blue	ACTRT2	black
	ABCC6	magenta	ADAM23	pink
	ABCC8	blue	ADAM33	pink
	ABCC9	blue	ADAM8	white
	ABCG5	blue	ADAMTS16	pink
	ABHD17B	blue	ADAMTS7	black
	ABHD6	darkgreen	ADAMTSL5	black
	ABI3BP	tan	ADCYAP1R1	black
	ABL1	blue	ADGRA2	pink
	ABLIM2	brown	ADGRE3	white
	ABLIM3	brown	ADGRG3	white
	ABTB2	midnightblue	ADH4	pink
	ACACA	magenta	ADRA2A	pink
	ACACB	darkgreen	AEBP1	pink
	ACADSB	darkgreen	AGBL3	black
	ACAT2	magenta	AGT	pink
	ACCS	blue	AHNAK2	pink
	ACE2	brown	AHSG	black
	ACHE	brown	AK4	pink
	ACKR1	blue	AKAP10	black
	ACKR3	blue	ALDH1A2	pink
	ACKR4	brown	ALDH1A3	pink
	ACOT11	tan	ALDH1B1	pink
	ACOT7	tan	ALDH8A1	black
	ACP2	tan	ALG1	black
	ACP6	blue	ALOXE3	black
	ACR	brown	ALPP	black
	ACSBG2	blue	AMBN	black
	ACSL1	blue	AMH	black
	ACSM1	blue	AMN	black
	ACSM2B	blue	AMPD2	white
	ACSM3	magenta	ANGPT2	pink
	ACTRT3	blue	ANKRD19P	black
	ACVR1C	blue	ANKRD33	black
	ACVR2B	midnightblue	AOX1	pink
	ACVRL1	brown	APCS	black
	ACY3	tan	APOBEC3A	white
	ADAM11	brown	APOBEC3B	white
	ADAM12	brown	APOD	pink
	ADAM19	midnightblue	ARMH4	pink
	ADAM20	brown	ASGR2	white
	ADAM21	blue	ASIC2	pink
	ADAM22	magenta	ASTN1	pink
	ADAM7	brown	ATXN7L2	black
	ADAMTS1	blue	AVP	black
	ADAMTS13	brown	B4GALT2	pink
	ADAMTS14	brown	BARX1	black
	ADAMTS2	blue	BEND6	pink
	ADAMTS3	magenta	BEST2	black
	ADAMTS4	blue	BGN	pink
	ADAMTS9	blue	BHLHE22	pink
	ADAMTSL2	darkgreen	BHLHE23	black
	ADAMTSL3	brown	BHMT2	pink
	ADARB1	brown	BICRA	black
	ADARB2	brown	BMP8A	pink
	ADARB2-AS1	brown	BNC1	pink
	ADCY1	darkgreen	BNC2	pink
	ADCY4	brown	BOC	pink
	ADCY8	brown	BPI	white
	ADD2	darkgreen	BPIFB2	black
	ADGRB3	brown	BRWD1-AS2	black
	ADGRE5	blue	C12orf56	black
	ADGRG1	blue	C16orf74	pink
	ADGRG2	brown	C1orf158	black
	ADGRG4	tan	C1orf229	black
	ADGRG6	brown	C1QTNF3	pink
	ADGRL2	brown	C1R	pink
	ADGRV1	magenta	C1S	pink
	ADH1A	darkgreen	C21orf58	black
	ADH1C	darkgreen	C21orf62	pink
	ADHFE1	midnightblue	C3	pink
	ADIPOR2	brown	C3orf35	black
	ADIRF	brown	C5orf58	black
	ADM	blue	C6orf15	black
	ADORA2A	skyblue	C7	pink
	ADRA1A	brown	CA7	black
	ADRA1B	darkgreen	CA9	pink
	ADRB2	brown	CACNA1F	black
	ADRB3	brown	CACNA1G	pink
	AEN	blue	CACNG3	black
	AFAP1-AS1	brown	CACNG7	black
	AFAP1L1	brown	CACTIN	black
	AFAP1L2	darkgreen	CALB2	pink
	AFDN	brown	CALHM1	black
	AFF2	brown	CAPN11	pink
	AFF3	brown	CAPN6	pink
	AFF4	blue	CARNS1	pink
	AGER	brown	CASKIN1	black
	AGFG2	magenta	CBARP	black
	AGO2	blue	CCDC177	black
	AGPAT4-IT1	blue	CCDC80	pink
	AGTR1	brown	CCL24	black
	AGTR2	magenta	CCL26	pink
	AHCYL2	magenta	CCND2	pink
	AHNAK	brown	CCR3	white
	AHSP	blue	CCT8L2	black
	AIF1L	brown	CD300LB	black
	AJAP1	brown	CD4	black
	AJUBA	brown	CDA	white
	AKAP12	blue	CDH2	pink
	AKIRIN1	blue	CDH22	black
	AKR1C3	brown	CDH23	pink
	ALAS2	blue	CDK5R2	black
	ALKAL1	brown	CDKN2A-DT	black
	ALKAL2	blue	CDON	pink
	ALOX12	brown	CDSN	black
	ALOX15B	magenta	CEACAM1	pink
	ALPL	magenta	CEACAM20	black
	ALS2CL	brown	CEACAM8	white
	ALX3	blue	CEMIP	pink
	AMBP	magenta	CFAP97D1	black
	AMDHD1	blue	CFHR3	pink
	AMER2	brown	CFP	white
	AMHR2	blue	CHAT	black
	AMIGO2	brown	CHRD	pink
	AMOTL1	brown	CHRDL2	pink
	AMOTL2	brown	CHST13	black
	ANAPC1	brown	CHST8	pink
	ANGPT1	tan	CIDEA	pink
	ANGPTL1	tan	CILP	pink
	ANGPTL7	brown	CLCNKB	black
	ANGPTL8	blue	CLDN6	black
	ANK2	blue	CLIP3	pink
	ANK3	magenta	CLMP	pink
	ANKAR	midnightblue	CMTM2	white
	ANKRD1	brown	CNIH2	black
	ANKRD17	blue	CNOT4	black
	ANKRD20A2	brown	CNTNAP5	black
	ANKRD29	brown	COL10A1	pink
	ANKRD30BP2	midnightblue	COL14A1	pink
	ANKRD34A	blue	COL15A1	pink
	ANKRD37	blue	COL16A1	pink
	ANKRD7	brown	COL18A1	pink
	ANKS1A	brown	COL1A2	pink
	ANO1	darkgreen	COL3A1	pink
	ANO2	brown	COL5A1	pink
	ANO3	brown	COL5A2	pink
	ANO4	brown	COL6A2	pink
	ANOS1	brown	COL8A1	pink
	ANXA10	brown	COL9A1	black
	ANXA3	brown	COLEC11	pink
	ANXA6	brown	COMP	pink
	ANXA8L1	brown	COPZ2	pink
	ANXA9	blue	CPN1	black
	AOC1	brown	CPXM1	pink
	AOC2	blue	CPXM2	pink
	AOC4P	brown	CRABP2	pink
	AP1M2	magenta	CRACR2B	black
	AP3B2	brown	CREB3L1	black
	APC2	blue	CRHR2	black
	APCDD1	blue	CROT	black
	APLN	brown	CSH2	black
	APLNR	brown	CSHL1	black
	APOA1	brown	CSN1S1	black
	APOA5	blue	CST1	pink
	APOBEC2	brown	CST2	black
	APOH	magenta	CT47A11	black
	APOL3	skyblue	CTHRC1	pink
	APOL4	skyblue	CTRB2	black
	APOL5	brown	CTSK	pink
	APOLD1	blue	CXCR1	white
	AQP1	brown	CYP21A2	black
	AQP10	brown	CYP4A11	black
	AQP11	blue	CYTL1	pink
	AQP4	magenta	DAB1	black
	AR	brown	DBN1	pink
	ARAP3	brown	DCLK1	pink
	ARC	blue	DCST2	black
	AREG	blue	DCT	black
	ARFGEF3	magenta	DEFA3	white
	ARG2	blue	DEFA4	white
	ARGLU1	tan	DEPTOR	pink
	ARHGAP19	brown	DGAT2	white
	ARHGAP20	tan	DIO2	pink
	ARHGAP24	brown	DKFZP434A062	black
	ARHGAP25	skyblue	DLG2	pink
	ARHGAP35	blue	DLG4	black
	ARHGAP42	tan	DNAJC5G	black
	ARHGAP6	brown	DNHD1	black
	ARHGEF10	brown	DOCK3	black
	ARHGEF15	brown	DOK5	pink
	ARHGEF25	brown	DPEP1	pink
	ARHGEF26	brown	DPYSL4	pink
	ARHGEF35	brown	DUSP15	black
	ARHGEF37	darkgreen	DYNC1I1	pink
	ARHGEF38	blue	EBF1	pink
	ARHGEF4	brown	EBF2	pink
	ARHGEF5	blue	EBF3	pink
	ARHGEF7	blue	ECM1	pink
	ARID5A	blue	EGFLAM	pink
	ARID5B	blue	ELOVL4	pink
	ARIH2OS	blue	EMX1	black
	ARL14	blue	EMX2	pink
	ARL17A	blue	EMX2OS	pink
	ARL4A	blue	EN2	black
	ARL5B	blue	ENSG00000258539	black
	ARMC12	blue	ENSG00000267645	black
	ARMC8	blue	ENSG00000268500	white
	ARNT2	brown	ENSG00000271434	black
	ARNTL	blue	ENSG00000273167	pink
	ARNTL2	brown	EPHA3	pink
	ARRB1	brown	EPHA8	black
	ARRDC2	brown	EPHB1	pink
	ARRDC3	blue	EPHX3	black
	ARSD	blue	ESR1	pink
	ARSE	tan	EVX1	black
	ART4	brown	EXTL1	pink
	ARVCF	darkgreen	F2RL2	pink
	ASAP1-IT1	blue	FADS6	black
	ASB9	brown	FAM131C	black
	ASMT	brown	FAM155A	pink
	ASMTL-AS1	blue	FAM178B	black
	ASPA	tan	FAM43B	pink
	ASPG	brown	FBLIM1	pink
	ASPN	tan	FBLN1	pink
	ASRGL1	brown	FBLN2	pink
	ASXL3	blue	FBLN7	pink
	ATF3	blue	FBRSL1	black
	ATF5	midnightblue	FBXO31	black
	ATF7	blue	FCN1	white
	ATG101	blue	FFAR2	white
	ATM	magenta	FGF1	pink
	ATOH8	brown	FHL2	pink
	ATP10A	magenta	FKBP10	pink
	ATP13A4	magenta	FKBP7	pink
	ATP1A1-AS1	blue	FLRT2	pink
	ATP1A4	blue	FMO1	pink
	ATP1B3	blue	FMOD	pink
	ATP23	blue	FN1	black
	ATP2A1	blue	FN3K	black
	ATP2B4	blue	FNDC1	pink
	ATP2C2	magenta	FOXB1	black
	ATP6AP1L	blue	FOXH1	black
	ATP6V1B1	darkgreen	FPR1	white
	ATP6V1C2	brown	FRRS1L	black
	ATP6V1G2	darkgreen	FRZB	pink
	ATP7B	brown	FSTL1	pink
	ATP8A2	magenta	FTMT	black
	ATP8B3	blue	FUBP3	black
	ATP8B4	brown	FXYD7	black
	ATXN2L	blue	GABRA3	black
	AVIL	blue	GABRD	pink
	AVPR1A	blue	GABRG2	black
	AVPR2	darkgreen	GALNT15	pink
	AXIN2	blue	GALNT16	pink
	AZGP1	magenta	GALNT9	pink
	B3GALNT1	brown	GALR3	black
	B3GAT1	skyblue	GAMT	pink
	B3GAT2	blue	GAS1	pink
	B3GNT5	blue	GAS7	pink
	B3GNT8	magenta	GAST	black
	B4GALNT2	tan	GCA	white
	B4GALT1	blue	GDF11	pink
	B4GALT5	blue	GDF6	pink
	B4GAT1	darkgreen	GDNF	pink
	BAALC	brown	GIPC3	black
	BACE2	brown	GIPR	black
	BACH2	brown	GLI1	pink
	BAG3	blue	GLI2	pink
	BAIAP2	magenta	GLIS1	pink
	BAMBI	darkgreen	GLP2R	pink
	BARHL1	blue	GLT1D1	white
	BARX2	blue	GLT8D2	pink
	BASP1	midnightblue	GML	black
	BATF	blue	GNG8	black
	BATF2	skyblue	GP1BA	black
	BATF3	blue	GPR119	black
	BBC3	blue	GPR150	black
	BBS12	midnightblue	GPR173	black
	BCAR4	blue	GPR3	black
	BCAT1	darkgreen	GPR32	black
	BCHE	tan	GPR78	pink
	BCL11A	brown	GPRC5B	pink
	BCL2L1	blue	GPX7	pink
	BCL3	blue	GPX8	pink
	BCL6	blue	GREB1	pink
	BCL6B	brown	GREM1	pink
	BCO1	blue	GRK1	black
	BCOR	brown	GRM5	black
	BDKRB1	blue	GRPR	black
	BDKRB2	blue	GSC	pink
	BDNF	brown	GSX1	black
	BEX1	brown	GXYLT2	pink
	BEX5	brown	H19	pink
	BFSP1	brown	HAP1	black
	BHLHE40	blue	HAR1A	black
	BIN3-IT1	blue	HCRTR1	black
	BLID	blue	HEPACAM	black
	BMF	blue	HEPH	pink
	BMP1	midnightblue	HIST1H2AA	black
	BMP2K	brown	HIST1H2AC	black
	BMP3	magenta	HIST1H4D	black
	BMP4	blue	HMGB4	black
	BMP5	brown	HMX2	black
	BMP6	brown	HOXD10	pink
	BMPER	brown	HOXD3	pink
	BMPR2	brown	HOXD8	pink
	BMS1	blue	HOXD9	pink
	BNIPL	magenta	HPSE2	pink
	BORCS6	blue	HRC	pink
	BRI3BP	tan	HRG	black
	BRINP1	brown	HRH2	black
	BSN	brown	HS3ST3A1	pink
	BSPRY	magenta	HSPA12A	pink
	BST2	skyblue	HSPB9	black
	BTBD11	brown	HTR2A	pink
	BTBD19	blue	HTR3A	black
	BTBD3	brown	HTR7P1	black
	BTBD8	midnightblue	HTRA3	pink
	BTBD9	blue	IAPP	black
	BTG2	blue	IFNL2	black
	BTN2A3P	blue	IGDCC4	pink
	BTN3A1	skyblue	IGF1	pink
	BTN3A2	skyblue	IGF2	pink
	BTNL3	brown	IGF2-AS	black
	BTNL8	brown	IGFBP3	pink
	BTNL9	brown	IGFBP4	pink
	BVES	brown	IGFBP5	pink
	BYSL	blue	IGFBP6	pink
	C10orf25	brown	IGFBP7	pink
	C10orf67	brown	IL16	black
	C11orf45	blue	IL17A	black
	C11orf80	brown	IL17RD	pink
	C11orf96	blue	IL1RAPL2	black
	C12orf54	brown	IL36B	black
	C12orf60	blue	INA	black
	C12orf66	brown	INHBE	black
	C12orf76	blue	INS	black
	C14orf178	brown	IQSEC2	black
	C15orf48	brown	ISLR	pink
	C15orf56	blue	ISLR2	pink
	C16orf92	brown	ISM1	pink
	C17orf64	brown	ITGA11	pink
	C17orf67	blue	ITGA9	pink
	C17orf98	blue	ITGBL1	pink
	C19orf33	magenta	ITLN1	pink
	C19orf73	blue	IZUMO1R	black
	C1orf115	brown	KAZALD1	pink
	C1orf116	magenta	KCND1	pink
	C1orf198	brown	KCND2	pink
	C1orf210	magenta	KCNK9	black
	C1orf53	tan	KCNMB1	black
	C1QTNF1	blue	KCNN3	pink
	C1QTNF12	blue	KCNQ3	black
	C1QTNF5	brown	KCTD4	pink
	C1QTNF6	blue	KCTD8	pink
	C1QTNF7	tan	KDELR3	pink
	C2	tan	KIAA1755	pink
	C20orf202	brown	KIF7	pink
	C21orf91	brown	KLHL14	pink
	C2CD3	blue	KLK2	black
	C2CD4B	blue	KNG1	black
	C2CD6	midnightblue	KRT32	black
	C2orf66	blue	KRT85	black
	C2orf74	midnightblue	KRT9	black
	C2orf88	brown	KRTAP1-3	black
	C2orf92	brown	KRTAP11-1	black
	C3orf14	darkgreen	KRTAP12-1	black
	C3orf52	blue	KRTAP13-4	black
	C4B	brown	KRTAP2-1	black
	C4BPA	magenta	KRTAP2-4	black
	C4BPB	brown	KRTAP4-12	black
	C4orf19	blue	L3MBTL4	pink
	C4orf36	brown	LAMP5	pink
	C5	brown	LCE1A	black
	C5AR1	blue	LCE1C	black
	C5orf38	brown	LCE1D	black
	C5orf56	blue	LCE3D	black
	C6orf223	magenta	LDLRAD4	pink
	C8A	blue	LEXM	black
	C8orf48	midnightblue	LFNG	black
	C9orf139	blue	LGALS12	white
	C9orf72	blue	LHFPL5	black
	CA1	blue	LILRA1	white
	CA12	blue	LILRA3	white
	CA4	brown	LILRA5	white
	CA5A	blue	LINC00334	black
	CA5B	tan	LINC00442	black
	CABYR	brown	LINC00469	black
	CACNA1D	brown	LINC00574	black
	CACNA1S	brown	LINC00593	black
	CACNA2D2	magenta	LINC00626	black
	CACNA2D3	brown	LINC01116	pink
	CACNG4	brown	LINC01120	black
	CACYBP	midnightblue	LINC01559	black
	CADPS	blue	LINC02381	pink
	CALCR	midnightblue	LINGO1	pink
	CALD1	tan	LOX	pink
	CALHM5	darkgreen	LOXL2	pink
	CAMK1D	brown	LRFN5	pink
	CAMK2A	brown	LRP3	black
	CAMK2N1	brown	LRRC15	pink
	CAMKK2	brown	LRRC4C	pink
	CAMKMT	blue	LRRN2	pink
	CAMP	brown	LY6G6C	black
	CAMSAP1	blue	LYPD3	pink
	CAMSAP3	magenta	MAFA	black
	CAMTA1	brown	MAGEA6	black
	CAPN12	magenta	MAGEB2	black
	CAPN14	brown	MAGEL2	pink
	CAPN9	magenta	MAMSTR	black
	CARD10	darkgreen	MAS1L	black
	CARD16	brown	MAST1	black
	CARD17	brown	MATN2	pink
	CASKIN2	brown	MEIS3	pink
	CASP12	brown	MEOX1	pink
	CASQ1	brown	MEX3D	black
	CASS4	darkgreen	MFAP2	pink
	CASZ1	brown	MGAM	white
	CATSPERB	darkgreen	MGARP	pink
	CAV1	brown	MGP	pink
	CAV2	brown	MIER3	black
	CAV3	brown	MIR7-3HG	black
	CAVIN1	brown	MISP3	black
	CAVIN2	brown	MMP11	pink
	CBFA2T3	brown	MMP17	black
	CBLB	blue	MMP23B	pink
	CBLC	tan	MMP25	white
	CBR3	brown	MN1	pink
	CCBE1	brown	MNDA	white
	CCDC102B	tan	MOXD1	pink
	CCDC116	brown	MPO	white
	CCDC121	midnightblue	MRGPRE	black
	CCDC142	blue	MSI1	black
	CCDC28B	brown	MT3	black
	CCDC38	brown	MTCP1	black
	CCDC42	brown	MUC15	pink
	CCDC68	brown	MUC2	black
	CCDC71L	blue	MUC6	black
	CCDC8	darkgreen	MXRA5	pink
	CCDC85A	brown	MXRA8	pink
	CCDC85B	darkgreen	MYCNOS	black
	CCDC9B	blue	MYH14	black
	CCER2	brown	MYO3A	black
	CCIN	blue	MYRIP	pink
	CCK	brown	NCAM1	pink
	CCL11	midnightblue	NCR2	black
	CCL16	blue	NFE2	white
	CCL17	blue	NGFR	pink
	CCL2	blue	NHLRC2	black
	CCL20	blue	NID2	pink
	CCL22	brown	NKAIN2	pink
	CCL25	brown	NKX2-3	black
	CCL3L3	blue	NLGN1	pink
	CCL4	blue	NLGN3	pink
	CCL7	darkgreen	NMNAT2	pink
	CCL8	blue	NPB	black
	CCM2L	brown	NPC1L1	black
	CCN1	blue	NPFFR2	pink
	CCN4	midnightblue	NPTX2	pink
	CCNB3	brown	NR5A2	pink
	CCND1	brown	NRXN2	pink
	CCNG2	blue	NT5E	pink
	CCNH	blue	NTRK2	black
	CCNJL	magenta	NTSR1	black
	CCNL1	blue	NXNL1	black
	CCNT1	blue	OAF	pink
	CCNYL1	blue	OGFR	black
	CD109	tan	OIT3	pink
	CD160	skyblue	OLFM1	pink
	CD164	darkgreen	OLFM4	white
	CD177	blue	OLFML2B	pink
	CD1A	brown	OPN1SW	black
	CD200	magenta	OR10A2	black
	CD207	brown	OR10A4	black
	CD244	skyblue	OR10A5	black
	CD247	skyblue	OR10H1	black
	CD274	blue	OR10H2	black
	CD300LG	brown	OR10J5	black
	CD34	darkgreen	OR10P1	black
	CD36	tan	OR11A1	black
	CD55	magenta	OR1D2	black
	CD59	blue	OR1S2	black
	CD69	blue	OR2A25	black
	CD83	blue	OR2B2	black
	CD93	brown	OR2H1	black
	CDC25B	darkgreen	OR3A3	black
	CDC37L1	blue	OR4A15	black
	CDC42	blue	OR4C15	black
	CDC42EP2	blue	OR4X2	black
	CDC42EP4	blue	OR5A1	black
	CDC42SE1	blue	OR5F1	black
	CDH10	brown	OR5H1	black
	CDH13	brown	OR5L2	black
	CDH15	tan	OR5V1	black
	CDH16	magenta	OR6K2	black
	CDH19	brown	OR6M1	black
	CDH3	brown	OSR1	pink
	CDH4	brown	OSR2	pink
	CDH6	tan	OTOF	black
	CDH7	brown	OTUD6A	black
	CDK15	blue	OXT	black
	CDK2	blue	P2RX3	black
	CDKAL1	brown	P2RY4	black
	CDKN1A	blue	P4HA3	pink
	CDKN1B	blue	PADI4	white
	CDKN1C	brown	PAMR1	pink
	CDKN2A	brown	PANX2	black
	CDO1	brown	PAPLN	pink
	CDR1	blue	PARD6G	pink
	CDR2L	brown	PAX4	black
	CDX1	brown	PBLD	black
	CDYL2	brown	PCDH19	pink
	CEACAM3	magenta	PCDHGA7	black
	CEACAM5	magenta	PCDHGC5	black
	CEACAM6	magenta	PCOLCE	pink
	CEACAM7	magenta	PCSK1	pink
	CEBPA	blue	PCSK1N	black
	CEBPA-DT	blue	PCSK5	pink
	CEBPB	blue	PDE1A	pink
	CELA2A	brown	PDE2A	pink
	CELA2B	brown	PDGFD	pink
	CELF3	blue	PDGFRL	pink
	CELF4	brown	PDIA2	pink
	CELSR3	brown	PDZD3	pink
	CEMIP2	blue	PENK	pink
	CENPP	blue	PEX26	black
	CENPV	brown	PFKL	black
	CENPW	brown	PGLYRP1	white
	CEP250	blue	PHF24	pink
	CETP	brown	PHYHIP	pink
	CFB	brown	PKD1L2	pink
	CFHR4	blue	PLA2G2A	pink
	CFI	brown	PLCD4	pink
	CFL2	tan	PLEKHA4	pink
	CFLAR	blue	PLTP	pink
	CFTR	magenta	PLVAP	pink
	CGAS	blue	PLXDC1	pink
	CGNL1	brown	PODN	pink
	CH25H	blue	PODNL1	pink
	CHAC2	darkgreen	POM121L9P	pink
	CHD2	blue	POU3F4	black
	CHDH	blue	PPP6R1	black
	CHI3L1	brown	PRB3	black
	CHI3L2	blue	PRDM8	black
	CHIA	magenta	PRG3	black
	CHMP4B	blue	PROCR	pink
	CHMP4C	magenta	PROK2	white
	CHODL	brown	PROX1	pink
	CHRM2	brown	PRPH2	pink
	CHRM3	brown	PRR21	black
	CHRNA10	blue	PRR36	black
	CHRNA6	brown	PRRX2	pink
	CHRNB1	blue	PSORS1C2	black
	CHRNE	blue	PTGER1	pink
	CHST1	darkgreen	PTGER3	pink
	CHST11	darkgreen	PTGIS	pink
	CHST2	blue	PTH2	black
	CHST3	brown	PTPRN	black
	CHSY1	blue	PYY2	black
	CIART	blue	RAB3IL1	pink
	CIB3	blue	RARA	black
	CIB4	brown	RARRES1	pink
	CIRBP	blue	RASGRF2	pink
	CIT	blue	RASGRP4	white
	CITED1	blue	RAVER1	black
	CITED2	blue	RAX2	black
	CITED4	brown	RBMY1B	black
	CKAP4	midnightblue	RBP5	pink
	CLASP2	blue	RBP7	pink
	CLCA1	blue	RCN3	pink
	CLCF1	blue	RELN	pink
	CLDN14	midnightblue	RET	pink
	CLDN23	magenta	RETNLB	black
	CLDN7	magenta	RGL4	white
	CLDND2	brown	RGMA	pink
	CLEC14A	brown	RGS18	white
	CLEC2D	blue	RGS4	pink
	CLEC3B	brown	RHBDL1	black
	CLEC4F	blue	RIN3	white
	CLEC4M	brown	RIPOR1	black
	CLIC4	tan	RIPOR2	white
	CLIC5	brown	RLBP1	black
	CLRN1	blue	ROR2	pink
	CLTRN	brown	RPL3L	black
	CMA1	brown	RSPO3	pink
	CMKLR1	darkgreen	RTBDN	black
	CMTM5	brown	RTP1	black
	CMTM8	brown	RUNDC3A	black
	CNDP1	blue	RUNDC3B	pink
	CNIH3	brown	RXFP4	black
	CNKSR3	blue	S100A12	white
	CNNM2	brown	S100A5	black
	CNTN4	tan	S100A7	black
	CNTNAP3	blue	S100A8	white
	COL11A2	brown	S100A9	white
	COL12A1	tan	S100Z	white
	COL13A1	brown	SCARA3	pink
	COL17A1	brown	SCARA5	pink
	COL21A1	tan	SCARF2	black
	COL22A1	brown	SCG2	pink
	COL24A1	brown	SCN1B	pink
	COL25A1	brown	SCN3A	black
	COL4A1	blue	SCP2	black
	COL4A2	brown	SCRG1	pink
	COL4A3	brown	SERPINA5	pink
	COL4A5	tan	SERPINE2	pink
	COL5A3	darkgreen	SERPINF1	pink
	COL6A5	brown	SEZ6	black
	COL6A6	tan	SFRP1	pink
	COLEC10	brown	SFRP2	pink
	COLEC12	blue	SH3PXD2A	pink
	COLGALT2	darkgreen	SHH	black
	COQ10B	blue	SHISA7	black
	CORIN	brown	SHISAL1	pink
	CORO2B	darkgreen	SIM1	black
	CORO6	brown	SLC10A1	black
	COX19	blue	SLC10A7	black
	COX4I2	brown	SLC14A2	black
	COX7A1	darkgreen	SLC16A2	pink
	CPA1	brown	SLC17A7	black
	CPA2	brown	SLC22A23	black
	CPA3	blue	SLC25A21	black
	CPAMD8	brown	SLC25A47	black
	CPED1	tan	SLC2A4	pink
	CPLX1	darkgreen	SLC34A1	black
	CPNE2	brown	SLC38A11	pink
	CPO	blue	SLC38A3	black
	CPS1-IT1	blue	SLC4A3	pink
	CRACR2A	brown	SLN	pink
	CRB2	brown	SMAD1	pink
	CREB5	blue	SMO	pink
	CREBRF	tan	SMOC1	pink
	CREG2	tan	SMOC2	pink
	CREM	blue	SNAI2	pink
	CRHBP	blue	SNCB	black
	CRIP2	darkgreen	SND1-IT1	black
	CRIP3	midnightblue	SNTG2	pink
	CRISPLD2	blue	SOX30	black
	CRLF2	midnightblue	SPOCK1	pink
	CRMP1	brown	SPON1	pink
	CROCC	blue	SPON2	pink
	CROCCP2	midnightblue	SPRN	black
	CROCCP3	midnightblue	SPRR1B	black
	CRTAC1	magenta	SPRR3	black
	CRYAB	darkgreen	SPRY1	pink
	CRYBA1	blue	SPSB4	black
	CRYBA4	brown	SPTBN4	pink
	CRYBG1	darkgreen	SRPX	pink
	CRYGS	midnightblue	SRRM3	pink
	CSF3	blue	SSTR3	black
	CSNK2A1	brown	SSX2	black
	CSPG4	brown	ST8SIA3	black
	CSRNP1	blue	STAB2	pink
	CSRP1	darkgreen	STAR	pink
	CST6	brown	STEAP1	pink
	CST7	skyblue	STIM2	black
	CT45A1	brown	STK32B	pink
	CT45A5	brown	STRN	black
	CTAG1A	blue	SUGCT	pink
	CTH	blue	SULF1	pink
	CTIF	brown	SULF2	pink
	CTNNAL1	brown	SULT1A4	pink
	CTNNBIP1	brown	SULT1B1	white
	CTNND2	brown	SV2B	pink
	CTRC	blue	SYCP1	black
	CTRL	skyblue	SYNDIG1	pink
	CTSG	brown	SYNGR1	pink
	CTSH	magenta	SYNGR3	black
	CTSV	brown	SYNGR4	black
	CTSW	skyblue	SYT2	black
	CTTNBP2NL	brown	SYT3	black
	CUL3	tan	SYT4	pink
	CUTALP	midnightblue	TAAR2	black
	CUZD1	blue	TAAR5	black
	CX3CL1	blue	TAS2R60	black
	CX3CR1	darkgreen	TBATA	black
	CXCL1	blue	TBX10	black
	CXCL17	magenta	TBX18	pink
	CXCL2	blue	TENM4	pink
	CXCL3	blue	TEX13B	black
	CXCL5	blue	TFR2	black
	CXCL8	blue	TGFB3	pink
	CXCR4	blue	TIMP1	pink
	CYB5R2	blue	TM4SF18	pink
	CYBRD1	tan	TM4SF5	black
	CYP19A1	brown	TM6SF2	black
	CYP1B1	brown	TMEM151A	black
	CYP26B1	darkgreen	TMEM154	white
	CYP27B1	darkgreen	TMEM229A	pink
	CYP2B6	magenta	TMEM252	black
	CYP2C18	magenta	TMEM71	white
	CYP2E1	brown	TMEM95	black
	CYP2S1	tan	TNC	pink
	CYP3A5	brown	TNFRSF10C	white
	CYP3A7	brown	TNFRSF1B	white
	CYP4B1	magenta	TNK2	black
	CYP4Z2P	brown	TNNI1	black
	CYP7A1	blue	TPD52L1	pink
	CYP7B1	blue	TPST1	pink
	CYTIP	blue	TRABD2B	pink
	CYTOR	blue	TREML2	white
	CYYR1	tan	TREML3P	black
	DAAM1	tan	TRIM42	black
	DAAM2	darkgreen	TRO	pink
	DACH1	brown	TRPM5	black
	DACH2	brown	TRPV5	black
	DACT1	blue	TSC22D4	black
	DACT2	blue	TSHZ2	pink
	DACT3	darkgreen	TSPAN10	black
	DAND5	blue	TSPAN16	white
	DAPK2	brown	TSPEAR	pink
	DAPL1	brown	TUBA3D	black
	DAPP1	brown	TUBB2B	pink
	DBF4B	blue	TUBB3	pink
	DBH	brown	TUBB4A	black
	DBNDD1	magenta	UBE2E1	black
	DBP	blue	UBQLN3	black
	DCC	brown	UCMA	black
	DCHS1	brown	UCP3	black
	DCHS2	brown	UGT3A1	black
	DCLRE1B	brown	UPK1A	black
	DCUN1D3	blue	UTS2R	black
	DDB2	blue	VAMP1	pink
	DDC	magenta	VASH2	pink
	DDIT4	blue	VAT1L	pink
	DDIT4L	blue	VIPR2	pink
	DDX11	brown	VIT	pink
	DDX17	blue	VNN2	white
	DDX25	blue	VWA7	black
	DDX31	blue	VWCE	pink
	DDX3X	blue	WDR93	black
	DDX3Y	blue	WDTC1	black
	DECR2	blue	WFDC3	black
	DEFB4A	midnightblue	WT1	pink
	DENND2A	brown	WT1-AS	pink
	DENND2C	blue	XCR1	black
	DENND3	brown	XKRX	pink
	DEPDC4	blue	XRCC6P5	black
	DEPDC7	blue	ZAN	black
	DEPP1	blue	ZBTB18	black
	DESI1	tan	ZBTB6	black
	DGCR5	blue	ZDHHC18	white
	DGKD	blue	ZFHX4	pink
	DGKH	brown	ZIC4	black
	DHCR24	magenta	ZMAT4	pink
	DHCR7	magenta	ZNF160	black
	DHRS2	brown	ZNF2	black
	DHRS9	brown	ZNF205	black
	DIO3OS	brown	ZNF385D	pink
	DIPK1B	brown	ZNF45	black
	DIPK2B	darkgreen	ZNF469	pink
	DIRAS1	brown	ZNF488	black
	DIS3	brown	ZNF566	black
	DISP1	brown	ZNF660	black
	DKK1	blue	ZNF791	black
	DKK2	brown	ZNF843	black
	DKK3	darkgreen	ZRANB3	black
	DLC1	blue	ZSCAN1	black
	DLEU1	blue
	DLGAP1	magenta
	DLK1	blue
	DLL3	brown
	DLL4	brown
	DLST	blue
	DLX3	blue
	DLX4	magenta
	DMAC1	darkgreen
	DMBT1	magenta
	DMRT2	brown
	DMRTA1	magenta
	DMRTC1	magenta
	DMTN	magenta
	DNAH17	brown
	DNAH8	brown
	DNAJB1	blue
	DNAJB5	blue
	DNAJB9	blue
	DNAJC18	brown
	DNAJC22	brown
	DNAJC27	blue
	DNAJC28	midnightblue
	DNAJC30	blue
	DNAJC7	brown
	DNASE1	blue
	DNASE1L2	blue
	DNM3	tan
	DNMT3B	blue
	DOC2B	blue
	DOCK4	brown
	DOCK5	blue
	DOCK6	brown
	DOCK9	brown
	DOK6	brown
	DOK7	brown
	DOT1L	blue
	DPF3	blue
	DPH3	blue
	DPM3	blue
	DPP6	brown
	DPT	darkgreen
	DPY19L1	blue
	DPYS	brown
	DRAM1	magenta
	DRD1	brown
	DRD5	brown
	DRICH1	midnightblue
	DSCAM	blue
	DSCC1	midnightblue
	DSEL	tan
	DTNB	tan
	DTX1	midnightblue
	DTX4	magenta
	DUOX1	magenta
	DUOX2	magenta
	DUSP1	blue
	DUSP10	blue
	DUSP13	blue
	DUSP14	blue
	DUSP16	blue
	DUSP2	blue
	DUSP4	blue
	DUSP5	blue
	DUSP5P1	blue
	DUSP6	blue
	DUSP7	blue
	DYRK3	blue
	DYSF	brown
	E2F3	darkgreen
	E2F5	brown
	ECE1	blue
	ECEL1	brown
	ECHDC3	magenta
	ECM2	tan
	ECSCR	brown
	EDA	brown
	EDA2R	blue
	EDAR	brown
	EDARADD	tan
	EDIL3	tan
	EDN1	brown
	EDN2	blue
	EDN3	brown
	EDNRA	tan
	EDNRB	brown
	EEPD1	brown
	EFCC1	brown
	EFNA1	magenta
	EFNB1	brown
	EFNB2	brown
	EGF	magenta
	EGFL7	brown
	EGFL8	brown
	EGR1	blue
	EGR2	blue
	EGR3	blue
	EGR4	blue
	EHD1	brown
	EHD3	brown
	EHHADH	blue
	EID3	blue
	EIF2A	brown
	EIF4G3	blue
	EIF5	blue
	EIF5A	midnightblue
	ELANE	brown
	ELF3	blue
	ELF5	magenta
	ELFN2	magenta
	ELL	blue
	ELL2	blue
	ELMOD2	darkgreen
	ELN	brown
	EMCN	tan
	EMD	blue
	EMID1	darkgreen
	EML1	brown
	EMP1	blue
	EMP2	brown
	ENAH	tan
	ENC1	blue
	ENDOU	blue
	ENDOV	brown
	ENG	brown
	ENPP1	brown
	ENPP6	blue
	ENSG00000175967	brown
	ENSG00000197991	magenta
	ENSG00000226007	blue
	ENSG00000249590	midnightblue
	ENSG00000253917	blue
	ENSG00000254979	midnightblue
	ENSG00000256028	brown
	ENSG00000256029	midnightblue
	ENSG00000261606	brown
	ENSG00000266818	midnightblue
	ENSG00000271698	blue
	ENSG00000284695	brown
	ENSG00000285772	brown
	ENTHD1	brown
	ENTPD3	magenta
	ENTPD7	midnightblue
	EPAS1	brown
	EPB41	blue
	EPB41L2	tan
	EPB41L4A-DT	blue
	EPB41L5	brown
	EPB42	blue
	EPG5	blue
	EPHA1	magenta
	EPHA10	brown
	EPHA2	blue
	EPHA4	blue
	EPHB3	blue
	EPHB4	brown
	EPHB6	darkgreen
	EPHX1	magenta
	EPHX4	blue
	EPN2	brown
	EPS8L2	magenta
	ERAP2	blue
	ERAS	brown
	ERBB3	magenta
	EREG	blue
	ERF	blue
	ERG	brown
	ERG28	magenta
	ERI2	blue
	ERMAP	blue
	ERMN	blue
	ERN1	blue
	ERO1A	brown
	ERP27	blue
	ERRFI1	blue
	ERVW-1	blue
	ESAM	brown
	ESM1	brown
	ESRP1	magenta
	ESRP2	magenta
	ESYT3	magenta
	ETS1	blue
	ETS2	blue
	ETV3	blue
	ETV5	brown
	EVA1A	magenta
	EXD1	blue
	EXOC3L1	brown
	EXOC6	brown
	EXOG	brown
	EXOSC5	tan
	EYA3	blue
	EZR	blue
	F11	magenta
	F2R	tan
	F5	brown
	F8	brown
	FAAP24	blue
	FABP12	brown
	FABP5	magenta
	FADS3	brown
	FAM102B	blue
	FAM107A	blue
	FAM110C	blue
	FAM118A	blue
	FAM124A	brown
	FAM124B	darkgreen
	FAM126A	blue
	FAM131A	blue
	FAM161B	blue
	FAM162B	brown
	FAM167A	brown
	FAM171A1	darkgreen
	FAM174B	magenta
	FAM186B	brown
	FAM189A1	brown
	FAM189A2	brown
	FAM209A	blue
	FAM20A	darkgreen
	FAM20C	midnightblue
	FAM217B	midnightblue
	FAM218A	midnightblue
	FAM222A	blue
	FAM228A	brown
	FAM3B	magenta
	FAM47E-STBD1	blue
	FAM49A	blue
	FAM53C	blue
	FAM71A	blue
	FAM90A1	brown
	FANCF	blue
	FAT1	blue
	FAT4	tan
	FATE1	blue
	FAXDC2	brown
	FBLN5	darkgreen
	FBN2	brown
	FBXL16	blue
	FBXO2	brown
	FBXO27	blue
	FBXO6	tan
	FCAR	blue
	FCER1A	blue
	FCN3	brown
	FERMT1	brown
	FEZ1	brown
	FGA	blue
	FGD3	skyblue
	FGF12	brown
	FGF14-AS2	brown
	FGF18	blue
	FGF7	magenta
	FGFBP1	blue
	FGFBP2	skyblue
	FGFBP3	blue
	FGFR1OP	darkgreen
	FGFR2	magenta
	FGFR3	magenta
	FGFR4	brown
	FGG	magenta
	FGL1	blue
	FHDC1	magenta
	FHL3	midnightblue
	FHL5	tan
	FIGN	brown
	FITM1	blue
	FITM2	tan
	FJX1	blue
	FKBP1A	blue
	FKBP1B	magenta
	FKBP5	blue
	FKBP6	blue
	FLCN	brown
	FLJ42393	blue
	FLT4	brown
	FLVCR1	darkgreen
	FMNL3	brown
	FMO3	darkgreen
	FMO5	magenta
	FMR1NB	brown
	FNBP1L	tan
	FNDC4	midnightblue
	FNDC5	brown
	FOLH1	tan
	FOLH1B	tan
	FOLR1	magenta
	FOLR3	magenta
	FOS	blue
	FOSB	blue
	FOSL1	blue
	FOSL2	blue
	FOXA2	magenta
	FOXC1	blue
	FOXD1	brown
	FOXD2	blue
	FOXD2-AS1	blue
	FOXD4	magenta
	FOXE3	blue
	FOXF1	brown
	FOXF2	brown
	FOXO1	blue
	FOXO3	blue
	FOXQ1	magenta
	FPGT-TNNI3K	brown
	FPR2	blue
	FRA10AC1	midnightblue
	FRAS1	brown
	FRAT2	blue
	FREM3	brown
	FRG2	brown
	FRMD3	brown
	FRMD4A	brown
	FRMD5	brown
	FRMPD4	blue
	FRRS1	brown
	FRY	brown
	FST	blue
	FURIN	midnightblue
	FUT1	brown
	FUT3	magenta
	FUT8-AS1	brown
	FXYD4	brown
	FXYD6	brown
	FZD1	darkgreen
	FZD10	blue
	FZD4	brown
	FZD5	magenta
	FZD7	darkgreen
	FZD8	brown
	G0S2	blue
	G6PD	tan
	GAB1	tan
	GABPB1	blue
	GABRE	tan
	GADD45A	blue
	GADD45B	blue
	GADD45G	blue
	GAL	midnightblue
	GAL3ST1	magenta
	GALE	tan
	GALM	blue
	GALNT13	brown
	GALNT14	brown
	GALNT17	darkgreen
	GALNT18	brown
	GALNT5	magenta
	GAREM1	blue
	GARNL3	brown
	GAS2	brown
	GAS2L1P2	brown
	GAS6	darkgreen
	GATA1	brown
	GATA4	brown
	GATA5	darkgreen
	GATA6	blue
	GATC	tan
	GATM	blue
	GBA3	brown
	GBP4	skyblue
	GBP7	brown
	GCAT	tan
	GCH1	blue
	GCM1	blue
	GDF10	brown
	GDF15	brown
	GDF2	brown
	GDF5	blue
	GDPD1	blue
	GDPD3	darkgreen
	GDPD5	brown
	GEM	blue
	GFI1B	brown
	GFOD1	brown
	GFPT2	blue
	GFRA3	brown
	GGT1	magenta
	GGT3P	magenta
	GGT8P	blue
	GGTA1P	blue
	GGTLC1	brown
	GGTLC2	magenta
	GHR	tan
	GHRHR	brown
	GIMAP1	darkgreen
	GIMAP2	skyblue
	GIMAP4	brown
	GIMAP5	brown
	GIMAP6	brown
	GIMAP7	midnightblue
	GIMAP8	brown
	GINS3	blue
	GJA1	blue
	GJA4	darkgreen
	GJA5	brown
	GJA9	blue
	GJB1	magenta
	GJB2	brown
	GJC3	brown
	GK	blue
	GKN2	magenta
	GLS2	magenta
	GMPPB	tan
	GNA15	midnightblue
	GNAI1	midnightblue
	GNAS	blue
	GNAZ	brown
	GNG11	brown
	GNLY	skyblue
	GNPTAB	blue
	GNRHR2	magenta
	GOLT1A	magenta
	GPAM	midnightblue
	GPAT2	brown
	GPAT3	blue
	GPC1	blue
	GPC5	magenta
	GPER1	brown
	GPIHBP1	brown
	GPM6A	brown
	GPM6B	brown
	GPR146	brown
	GPR15	brown
	GPR158	brown
	GPR160	brown
	GPR176	midnightblue
	GPR183	blue
	GPR20	darkgreen
	GPR21	blue
	GPR27	brown
	GPR34	blue
	GPR39	magenta
	GPR4	blue
	GPR45	blue
	GPR62	darkgreen
	GPR63	brown
	GPR68	blue
	GPR75	blue
	GPR84	midnightblue
	GPRASP1	tan
	GPRC5A	magenta
	GPRC5D	blue
	GPRIN1	brown
	GPSM1	brown
	GPX3	brown
	GRAMD1A	midnightblue
	GRAMD2A	magenta
	GRAP	darkgreen
	GRAPL	darkgreen
	GRB10	blue
	GRB7	magenta
	GRHL2	magenta
	GRIA1	brown
	GRID1	brown
	GRIK3	darkgreen
	GRIK4	brown
	GRK5	brown
	GRM1	brown
	GRM8	brown
	GRPEL2	tan
	GSDMA	brown
	GSR	brown
	GSTA4	magenta
	GSTM1	darkgreen
	GSTM2	blue
	GSTM2P1	blue
	GSTM3	darkgreen
	GSTM4	darkgreen
	GSTM5	darkgreen
	GSTO2	magenta
	GSTT2B	brown
	GTF2IRD1	blue
	GUCA1B	brown
	GUCA2A	brown
	GUCY1A1	tan
	GUCY1A2	brown
	GULP1	brown
	GUSBP1	blue
	GUSBP5	blue
	GYPB	blue
	GYPE	brown
	GZMB	skyblue
	GZMH	skyblue
	H1F0	blue
	H2AFX	midnightblue
	HABP2	brown
	HAL	blue
	HAO1	blue
	HAPLN1	brown
	HAS1	blue
	HAS2	blue
	HAS3	magenta
	HBA2	blue
	HBB	blue
	HBBP1	brown
	HBD	blue
	HBEGF	blue
	HBG1	blue
	HBQ1	blue
	HCG26	skyblue
	HCG27	blue
	HCG4	blue
	HCG4B	blue
	HCN3	blue
	HCRTR2	blue
	HDAC5	brown
	HDC	blue
	HDDC2	magenta
	HEATR3	brown
	HEATR4	brown
	HECTD3	blue
	HELB	blue
	HEMGN	blue
	HEPN1	brown
	HERC2P4	blue
	HERC6	brown
	HES1	blue
	HES5	blue
	HEXIM2	blue
	HEY1	darkgreen
	HEYL	blue
	HHEX	blue
	HHIP	magenta
	HIC1	blue
	HIF1A	blue
	HIF3A	brown
	HIGD1B	brown
	HILPDA	blue
	HIP1	brown
	HIPK1	blue
	HIPK4	brown
	HIST1H1A	blue
	HIST1H1D	blue
	HIST1H1E	blue
	HIST1H2AL	brown
	HIST1H3B	brown
	HIST1H3D	blue
	HIST1H4B	blue
	HIST1H4C	blue
	HIST1H4H	brown
	HIST1H4I	brown
	HIST1H4J	brown
	HIST1H4K	brown
	HIST1H4L	blue
	HIST4H4	blue
	HIVEP3	blue
	HKDC1	magenta
	HLA-E	skyblue
	HLX	darkgreen
	HM13	midnightblue
	HMCN1	tan
	HMGA1	darkgreen
	HMGCLL1	tan
	HMGCR	brown
	HMGCS1	brown
	HMGCS2	magenta
	HMOX1	darkgreen
	HMSD	blue
	HNF1B	magenta
	HOGA1	brown
	HOMER2	magenta
	HOPX	magenta
	HORMAD1	brown
	HOXA2	blue
	HOXA3	blue
	HOXA5	blue
	HOXA7	darkgreen
	HOXA9	blue
	HOXB2	blue
	HOXB3	blue
	HOXB4	darkgreen
	HOXB5	darkgreen
	HOXB6	darkgreen
	HOXB7	blue
	HOXD1	magenta
	HP	brown
	HPCAL1	brown
	HPCAL4	brown
	HPDL	brown
	HPGD	brown
	HPGDS	blue
	HPN	magenta
	HRCT1	darkgreen
	HRH3	tan
	HS3ST3B1	blue
	HS3ST5	brown
	HSD11B2	brown
	HSD17B2	magenta
	HSD17B6	magenta
	HSD17B7	darkgreen
	HSD3B1	blue
	HSD3B2	blue
	HSF2BP	brown
	HSF4	blue
	HSFX1	blue
	HSPA12B	brown
	HSPA1A	blue
	HSPA6	blue
	HSPB2	darkgreen
	HSPB8	blue
	HTR1E	brown
	HTR2B	brown
	HTR3C	brown
	HTR3E	brown
	HUS1B	blue
	HYAL1	brown
	ICAM1	blue
	ICAM2	brown
	ICAM5	blue
	ICE2	blue
	ICOS	blue
	ICOSLG	blue
	ID1	brown
	ID2	blue
	ID3	darkgreen
	IDI2-AS1	blue
	IDO1	skyblue
	IER2	blue
	IER3	blue
	IER5	blue
	IFI27	brown
	IFI6	brown
	IFIT1	brown
	IFIT2	brown
	IFITM2	blue
	IFNA4	blue
	IFNAR2	blue
	IFNLR1	blue
	IFRD1	blue
	IFT57	magenta
	IGFALS	brown
	IGFBP1	blue
	IGFBPL1	brown
	IGFL2	brown
	IGIP	midnightblue
	IGSF10	tan
	IGSF21	darkgreen
	IGSF22	tan
	IGSF3	magenta
	IL10	blue
	IL11RA	brown
	IL12A	brown
	IL13	blue
	IL13RA2	brown
	IL15RA	blue
	IL17D	darkgreen
	IL17RE	magenta
	IL18	blue
	IL18RAP	blue
	IL1A	blue
	IL1B	blue
	IL1R1	blue
	IL1R2	blue
	IL1RL1	brown
	IL1RL2	midnightblue
	IL2	blue
	IL20RA	blue
	IL20RB	brown
	IL22RA2	brown
	IL25	brown
	IL2RA	midnightblue
	IL33	tan
	IL34	brown
	IL4	blue
	IL4R	blue
	IL5	blue
	IL6	blue
	IL7R	brown
	ING1	blue
	INGX	blue
	INHA	blue
	INHBA	blue
	INMT-MINDY4	brown
	INPP1	blue
	INPP5J	magenta
	INSYN2A	blue
	IP6K2	blue
	IP6K3	brown
	IPCEF1	blue
	IPMK	blue
	IPO4	midnightblue
	IPP	blue
	IQCN	blue
	IRAK1BP1	blue
	IRAK3	blue
	IRF1	blue
	IRF2	blue
	IRF7	blue
	IRS1	tan
	IRS2	blue
	IRX2	magenta
	IRX3	magenta
	IRX5	magenta
	ISG15	brown
	ISG20	blue
	ISL2	blue
	ISM2	blue
	ITGA2	blue
	ITGA2B	brown
	ITGA3	brown
	ITGA5	blue
	ITGA6	tan
	ITGA8	tan
	ITGB3	blue
	ITGB6	magenta
	ITIH2	magenta
	ITIH5	blue
	ITLN2	brown
	ITM2A	brown
	ITM2C	brown
	ITPK1	brown
	ITPKA	blue
	ITPKC	blue
	ITPRIP	blue
	IYD	magenta
	IZUMO1	brown
	IZUMO2	magenta
	JAG2	darkgreen
	JAM3	brown
	JCAD	brown
	JDP2	blue
	JMJD6	blue
	JMY	blue
	JPH3	brown
	JUNB	blue
	KANK2	darkgreen
	KANK3	brown
	KANK4	brown
	KAZN	brown
	KBTBD11	blue
	KBTBD3	midnightblue
	KBTBD8	blue
	KCNA4	brown
	KCNAB3	blue
	KCNE2	darkgreen
	KCNE3	blue
	KCNE5	blue
	KCNG1	brown
	KCNG3	blue
	KCNH2	brown
	KCNH4	blue
	KCNH6	brown
	KCNIP1	brown
	KCNIP3	darkgreen
	KCNJ11	magenta
	KCNJ12	blue
	KCNJ14	blue
	KCNJ2	blue
	KCNJ6	brown
	KCNK1	blue
	KCNK17	brown
	KCNK3	brown
	KCNK5	magenta
	KCNK6	blue
	KCNMB4	brown
	KCNN1	brown
	KCNN2	brown
	KCNQ2	tan
	KCNS1	magenta
	KCTD14	magenta
	KCTD15	brown
	KCTD16	brown
	KCTD3	tan
	KCTD7	blue
	KDELR2	brown
	KDM4D	blue
	KDM5C	blue
	KDM6B	blue
	KDR	brown
	KHDRBS2	brown
	KIAA0408	brown
	KIAA1217	brown
	KIAA1614	brown
	KIF12	magenta
	KIF17	brown
	KIF25	brown
	KIF26A	darkgreen
	KIR2DL4	blue
	KIR2DL5A	skyblue
	KIR2DS4	skyblue
	KIR3DL1	skyblue
	KIR3DL3	brown
	KIRREL3	magenta
	KIT	blue
	KITLG	brown
	KL	brown
	KLB	magenta
	KLC4	blue
	KLF10	blue
	KLF15	brown
	KLF2	blue
	KLF4	blue
	KLF5	blue
	KLF6	blue
	KLF7	blue
	KLF9	blue
	KLHL11	blue
	KLHL15	blue
	KLHL23	tan
	KLHL24	midnightblue
	KLHL25	blue
	KLHL34	blue
	KLK1	blue
	KLK4	brown
	KLK5	brown
	KLK7	brown
	KLK8	brown
	KLRD1	skyblue
	KLRF1	skyblue
	KRT16	blue
	KRT18	blue
	KRT18P55	blue
	KRT19	magenta
	KRT35	blue
	KRT4	magenta
	KRT72	brown
	KRT76	tan
	KRT8	blue
	KRT86	blue
	KRTAP3-1	blue
	KRTCAP3	magenta
	KRTDAP	magenta
	KSR2	magenta
	L2HGDH	blue
	L3MBTL1	blue
	LACTB2	darkgreen
	LAIR2	skyblue
	LAMA1	brown
	LAMA3	brown
	LAMB1	tan
	LAMB4	brown
	LAMC2	magenta
	LAMC3	brown
	LAMP3	magenta
	LANCL2	brown
	LAPTM4B	magenta
	LATS2	blue
	LBH	darkgreen
	LCE2C	brown
	LCN12	blue
	LCN6	blue
	LDAH	blue
	LDB2	brown
	LDHA	blue
	LDHD	blue
	LDLR	blue
	LDLRAD3	brown
	LEF1-AS1	blue
	LEFTY1	darkgreen
	LEFTY2	brown
	LEMD1	darkgreen
	LEPR	tan
	LEPROT	brown
	LETM2	blue
	LGALS4	brown
	LGALS8	darkgreen
	LGALSL	brown
	LGI3	magenta
	LGR5	brown
	LHFPL2	darkgreen
	LHFPL3	blue
	LHFPL4	blue
	LHFPL6	tan
	LHPP	tan
	LHX6	darkgreen
	LHX9	blue
	LIAS	blue
	LIF	blue
	LIFR	brown
	LIM2	skyblue
	LIMCH1	brown
	LIN28A	blue
	LIN7A	blue
	LIN9	midnightblue
	LINC00189	blue
	LINC00261	magenta
	LINC00304	blue
	LINC00312	blue
	LINC00313	blue
	LINC00339	blue
	LINC00471	blue
	LINC00473	blue
	LINC00482	magenta
	LINC00515	brown
	LINC00526	blue
	LINC00638	blue
	LINC00652	blue
	LINC00839	brown
	LINC00842	brown
	LINC00909	blue
	LINC01006	blue
	LINC01011	blue
	LINC01089	blue
	LINC01114	blue
	LINC01140	blue
	LINC01191	blue
	LINC01197	tan
	LINC01547	tan
	LINC02026	blue
	LINC02210	blue
	LINC02656	tan
	LINC02693	midnightblue
	LINGO2	brown
	LIPG	blue
	LIPH	magenta
	LIPT2	blue
	LITAF	blue
	LMCD1	brown
	LMNA	blue
	LMNB1	midnightblue
	LMO2	brown
	LMO4	blue
	LMOD3	brown
	LNPK	blue
	LNX2	magenta
	LOC154761	skyblue
	LOC171391	blue
	LOC202181	midnightblue
	LOC389831	blue
	LOC646626	blue
	LOC90246	brown
	LONRF2	blue
	LONRF3	blue
	LOXHD1	brown
	LPA	blue
	LPCAT1	magenta
	LRATD1	brown
	LRATD2	brown
	LRCH1	brown
	LRCH2	tan
	LRCOL1	brown
	LRFN2	brown
	LRG1	blue
	LRIG3	blue
	LRP4	brown
	LRRC14	blue
	LRRC19	brown
	LRRC2	magenta
	LRRC31	magenta
	LRRC32	blue
	LRRC36	magenta
	LRRC38	blue
	LRRC3B	brown
	LRRC4B	brown
	LRRC75A	blue
	LRRC75B	blue
	LRRC8A	blue
	LRRC8B	blue
	LRRC8C	blue
	LRRC8E	blue
	LRRN3	brown
	LRRN4	brown
	LRRTM1	brown
	LRRTM4	brown
	LSAMP	darkgreen
	LSM11	blue
	LSMEM2	blue
	LSS	magenta
	LTC4S	darkgreen
	LUZP1	blue
	LY6E	brown
	LY6K	blue
	LYG1	blue
	LYG2	blue
	LYNX1	darkgreen
	LYPD1	brown
	LYPD2	brown
	LYPD5	blue
	LYPD6	brown
	LYSMD1	blue
	LYSMD4	brown
	LZTS1	blue
	MAB21L1	blue
	MAB21L4	magenta
	MACF1	brown
	MADCAM1	brown
	MAFB	midnightblue
	MAFF	blue
	MAFK	blue
	MAGEA12	brown
	MAGEE2	blue
	MAL	darkgreen
	MAL2	magenta
	MALL	magenta
	MAMDC2	brown
	MAMLD1	blue
	MANEAL	tan
	MAOB	darkgreen
	MAP1LC3C	brown
	MAP2K3	blue
	MAP3K14	blue
	MAP3K15	brown
	MAP3K20	blue
	MAP3K6	brown
	MAP3K7CL	magenta
	MAP3K8	blue
	MAP4K2	brown
	MAPK12	blue
	MAPK13	tan
	MAPKAPK5-AS1	blue
	MARCKSL1	brown
	MARK1	tan
	MARS2	blue
	MARVELD2	magenta
	MARVELD3	magenta
	MASP1	brown
	MAST4	tan
	MAT2A	blue
	MATK	skyblue
	MATN3	brown
	MAU2	blue
	MB21D2	blue
	MBL1P	blue
	MBOAT2	brown
	MBP	brown
	MC2R	blue
	MCF2	blue
	MCF2L	blue
	MCL1	blue
	MCM3AP-AS1	blue
	MCOLN3	brown
	MCTP2	blue
	MCTS1	midnightblue
	MDGA1	brown
	MDK	brown
	MDM2	darkgreen
	ME1	brown
	MECOM	magenta
	MED23	blue
	MED26	blue
	MEDAG	blue
	MEGF11	brown
	MEIS1	darkgreen
	MEIS2	tan
	MELTF	brown
	MEOX2	blue
	METRNL	blue
	METTL1	midnightblue
	METTL21A	blue
	METTL7B	tan
	MEX3B	blue
	MFAP3L	brown
	MFAP4	brown
	MFNG	darkgreen
	MFSD13A	magenta
	MFSD4A	brown
	MGAT4C	tan
	MGAT5	brown
	MGAT5B	brown
	MGC16275	blue
	MGST1	magenta
	MIA2	magenta
	MICAL2	blue
	MIP	brown
	MIR22HG	blue
	MIR4800	blue
	MISP	magenta
	MKNK2	brown
	MLC1	skyblue
	MLLT11	blue
	MLPH	magenta
	MLXIPL	magenta
	MME	brown
	MMP1	brown
	MMP12	brown
	MMP14	brown
	MMP15	blue
	MMP19	blue
	MMP3	brown
	MMP7	brown
	MMRN2	brown
	MNX1	blue
	MNX1-AS1	blue
	MOCOS	brown
	MOCS1	brown
	MORN4	blue
	MOV10L1	brown
	MPDZ	tan
	MPHOSPH8	blue
	MPIG6B	brown
	MPP3	brown
	MPP6	blue
	MPPED2	blue
	MPV17L	blue
	MPZL3	blue
	MRAP	brown
	MREG	blue
	MRI1	blue
	MRO	brown
	MROH8	blue
	MRPL43	blue
	MS4A2	blue
	MSC	midnightblue
	MSI2	brown
	MSLN	magenta
	MSMO1	magenta
	MSS51	blue
	MST1	blue
	MST1L	magenta
	MSX1	blue
	MSX2	blue
	MSX2P1	blue
	MT1A	blue
	MT1B	blue
	MT1E	blue
	MT1F	midnightblue
	MT1L	blue
	MT1M	blue
	MT2A	blue
	MTAP	blue
	MTG2	blue
	MTHFD1L	brown
	MTHFD2	darkgreen
	MTHFS	blue
	MTRF1	blue
	MTRF1L	blue
	MTURN	brown
	MUC1	magenta
	MUCL3	magenta
	MUSK	blue
	MVB12B	blue
	MVD	magenta
	MX1	brown
	MX2	midnightblue
	MXD1	blue
	MXRA7	brown
	MYADM	blue
	MYBPH	blue
	MYC	blue
	MYCN	blue
	MYCT1	tan
	MYH13	brown
	MYL1	brown
	MYL2	darkgreen
	MYL3	darkgreen
	MYL4	blue
	MYL9	darkgreen
	MYO15A	blue
	MYO15B	brown
	MYO16	brown
	MYO19	tan
	MYO1B	blue
	MYO1D	blue
	MYO7B	brown
	MYOM3	brown
	MYOZ1	brown
	MYOZ3	darkgreen
	MYRF	brown
	MYT1	blue
	MYZAP	brown
	MZT2A	blue
	N4BP3	brown
	NABP1	blue
	NACAD	blue
	NACC2	blue
	NAF1	blue
	NAGS	magenta
	NANOG	midnightblue
	NANOS1	blue
	NANOS3	brown
	NAP1L2	tan
	NAP1L5	blue
	NAPEPLD	midnightblue
	NAPSA	magenta
	NAT8	blue
	NAV2	brown
	NCALD	brown
	NCKAP5	brown
	NCOA7	blue
	NDP	magenta
	NDRG4	brown
	NDUFA4L2	brown
	NEBL	brown
	NECAB2	blue
	NECAB3	magenta
	NECTIN1	midnightblue
	NECTIN2	midnightblue
	NEDD4L	magenta
	NEDD9	blue
	NEK3	midnightblue
	NEK6	brown
	NEK8	blue
	NELL1	brown
	NES	brown
	NETO1	brown
	NETO2	brown
	NEU4	blue
	NEURL1B	darkgreen
	NEURL2	midnightblue
	NEURL3	skyblue
	NEXN	tan
	NEXN-AS1	brown
	NFATC1	blue
	NFATC2	blue
	NFIL3	blue
	NFKB2	blue
	NFKBIA	blue
	NFKBIB	midnightblue
	NFKBID	blue
	NFKBIE	midnightblue
	NFKBIZ	blue
	NIM1K	magenta
	NINJ2	magenta
	NKAIN1	brown
	NKAIN4	brown
	NKD1	brown
	NKD2	brown
	NKG7	skyblue
	NKPD1	brown
	NKX2-1	magenta
	NLRP14	tan
	NLRP2	tan
	NLRP3	blue
	NMUR1	brown
	NMUR2	brown
	NNMT	blue
	NOL4L	brown
	NOS1	brown
	NOS1AP	magenta
	NOS2	brown
	NOSTRIN	tan
	NOTCH4	brown
	NOX1	brown
	NOX5	brown
	NPAS2	blue
	NPDC1	brown
	NPHS1	brown
	NPNT	brown
	NPPA	blue
	NPR1	brown
	NPR3	brown
	NPTX1	blue
	NPTXR	darkgreen
	NPW	brown
	NPY	magenta
	NQO1	brown
	NQO2	brown
	NR0B2	magenta
	NR1D1	blue
	NR1D2	blue
[truncated: 1,331 more rows]

## Sheet: Supplementary Data 2
	Supplemental Data 2 Gene modules significantly associated with COPD and lung function in GSE76925
	Negative_genes	Negative_Module	Positive_gene	Positive_Module
	CSF2	green	MSH2	turquoise
	CXCL12	green	ADAMTS5	turquoise
	HAS1	brown	CXCL1	turquoise
	IL10	green	CXCL11	turquoise
	IL12A	brown	IFNG	turquoise
	MYBPC3	brown	IL16	turquoise
	NR4A3	brown	IL25	turquoise
	DUSP16	green	IL1R1	turquoise
	TMEM117	green	PLA2G4A	turquoise
	KRTAP10-1	brown	PPP1R12B	turquoise
	TPD52L1	green	TLR1	turquoise
	WDR53	green	LOC389834	turquoise
	ORM2	green	NXT2	turquoise
	RNF6	brown	CSF3R	turquoise
	KCNB1	brown	AMDHD1	turquoise
	SSX2IP	green	PKD2	turquoise
	PLEKHF2	brown	CEP72	turquoise
	DMC1	green	MECP2	turquoise
	TSC22D3	green	IDH3A	turquoise
	SLC6A6	green	HMGN3	turquoise
	MS4A6A	green	CAPN3	turquoise
	MAT2B	green	ODF2	turquoise
	OXCT2	brown	CRYBB2	turquoise
	BIRC5	green	ASPH	turquoise
	HCG27	brown	KIAA0513	turquoise
	RCCD1	brown	UBE2R2	turquoise
	RPL8	green	HMMR	turquoise
	QPCT	green	IRF4	turquoise
	CXCL3	brown	UTP15	turquoise
	CHI3L1	brown	TRIP12	turquoise
	MAP1LC3C	green	ABHD13	turquoise
	ENTPD7	green	PKN2	turquoise
	MPP6	green	F2RL3	turquoise
	TMEM129	brown	BMPR2	turquoise
	MGST1	green	ZNF146	turquoise
	SF3B1	brown	KIF27	turquoise
	TCL6	green	SMNDC1	turquoise
	ZFYVE9	brown	ING3	turquoise
	TCP10L	brown	AZU1	turquoise
	CHL1	green	PLK2	turquoise
	LIME1	brown	TIMM10	turquoise
	KCNK12	brown	TAF9B	turquoise
	UBL7	green	ASPHD2	turquoise
	PECR	green	TMEM45A	turquoise
	TLE2	brown	EPHB6	turquoise
	CHST10	brown	ZNF473	turquoise
	PTGER1	green	RPS19BP1	turquoise
	FKBP5	green	SLC29A2	turquoise
	KIF14	brown	YEATS4	turquoise
	DMBT1	green	KRT1	turquoise
	KIF23	green	SH3KBP1	turquoise
	CER1	brown	ACAD8	turquoise
	TSPAN4	green	PLA2G4E	turquoise
	ZNF441	brown	TLN2	turquoise
	P2RY13	brown	KLF5	turquoise
	FCGR2B	green	CACHD1	turquoise
	ADK	green	KCNMB3	turquoise
	RN7SK	green	RNF32	turquoise
	HIPK3	brown	PADI1	turquoise
	GAB1	brown	KLK3	turquoise
	ICOSLG	brown	PRPF38A	turquoise
	GAP43	brown	OSBPL8	turquoise
	USP43	green	HSD3B7	turquoise
	INSIG1	brown	ZNF517	turquoise
	LTA	brown	RNF185	turquoise
	TAF13	brown	CD247	turquoise
	CELSR2	green	VWCE	turquoise
	ELOVL4	brown	PLA2G3	turquoise
	RNASE4	green	ALG5	turquoise
	PROCA1	brown	ADIPOR2	turquoise
	CLEC7A	brown	SNN	turquoise
	SPATA20	brown	COPS8	turquoise
	WNT10A	brown	SLCO1A2	turquoise
	MID1IP1	brown	NUDCD2	turquoise
	ZNF69	green	ANKS1B	turquoise
	METRN	brown	REL	turquoise
	RPGR	brown	RPH3A	turquoise
	F2RL1	brown	ADI1	turquoise
	RGS10	green	RAPSN	turquoise
	KCNC4	brown	TLCD1	turquoise
	SFRP4	brown	PKIB	turquoise
	BBS4	brown	SHANK2	turquoise
	SOX9	green	CUBN	turquoise
	CRYAB	brown	NRG3	turquoise
	NXPH3	brown	PRSS21	turquoise
	ACOT1	green	PRG2	turquoise
	PEX10	brown	WSB1	turquoise
	DPAGT1	green	DYNLL2	turquoise
	WT1	green	PHACTR1	turquoise
	ADORA1	brown	POSTN	turquoise
	TAGLN	brown	CC2D1B	turquoise
	XK	brown	AK1	turquoise
	SMA5	brown	QRICH1	turquoise
	FASTKD3	green	GNA13	turquoise
	DBN1	brown	FAIM	turquoise
	HSPG2	green	PABPN1	turquoise
	DISP2	brown	NKG7	turquoise
	CEACAM21	brown	RILP	turquoise
	PDK2	green	EGLN3	turquoise
	PTPRR	brown	CLK3	turquoise
	COX11	green	PIK3R3	turquoise
	HPS3	green	XPA	turquoise
	CDON	green	NPY5R	turquoise
	MAML1	green	CETP	turquoise
	KCTD8	brown	SIGLEC5	turquoise
	WEE1	brown	MATN2	turquoise
	FAM3C	green	AKAP7	turquoise
	SPC24	green	MYOM2	turquoise
	RAB11B	brown	NANOS1	turquoise
	CR1	green	EFTUD2	turquoise
	SAMD11	brown	PDE4DIP	turquoise
	PRKD2	green	LYPD3	turquoise
	SLC25A18	brown	APOE	turquoise
	FUT4	green	PGBD5	turquoise
	SOAT1	brown	LRRN3	turquoise
	GPR176	green	RHOB	turquoise
	NDRG2	brown	NUS1	turquoise
	LEPR	brown	SNAPC2	turquoise
	RHBDL2	green	RGS5	turquoise
	IGFL3	green	FOXA3	turquoise
	MIA	brown	IRF2	turquoise
	OR12D3	green	ATRX	turquoise
	NID1	green	NHLRC2	turquoise
	CCM2	brown	SPRR1B	turquoise
	SLC19A3	brown	ZNF551	turquoise
	HSPB3	brown	WBP11	turquoise
	USP30	green	PAPOLG	turquoise
	NBPF1	brown	ZNF165	turquoise
	ACTRT1	brown	GNB4	turquoise
	PGF	brown	SGCB	turquoise
	LRRC8D	green	HLA-H	turquoise
	ABCA7	brown	GCNT1	turquoise
	ZNF655	green	ZNF567	turquoise
	PLA2G2D	green	POLR2K	turquoise
	COL13A1	brown	PPP4R2	turquoise
	ZNF429	brown	SEMA4B	turquoise
	CLEC4E	green	TIMM8B	turquoise
	SOX7	brown	BYSL	turquoise
	JUNB	brown	ITM2C	turquoise
	KCNF1	brown	HMBOX1	turquoise
	IRAK4	green	SAV1	turquoise
	ZBTB10	brown	USP8	turquoise
	HSPA1B	brown	RPL28	turquoise
	HYLS1	green	KCNK1	turquoise
	BCL11A	brown	ABTB2	turquoise
	CYP3A5	green	TMEM67	turquoise
	KLRC2	brown	PLAG1	turquoise
	KCTD7	green	HSD11B1L	turquoise
	BAGE2	brown	ELOVL5	turquoise
	ZNF223	green	ZNF593	turquoise
	AKT1S1	brown	DNAJB4	turquoise
	PCDHA1	brown	EPS15L1	turquoise
	ARSJ	green	C1D	turquoise
	RBP2	brown	DEK	turquoise
	ENPP6	brown	TERF1	turquoise
	CYP26B1	brown	VAPA	turquoise
	KCNA4	brown	SYAP1	turquoise
	CAV2	brown	TMEM53	turquoise
	PCDHB13	brown	RPS6KA3	turquoise
	KLRG1	green	THAP1	turquoise
	TMEM41A	green	IFT74	turquoise
	TXNRD1	green	RAPGEF6	turquoise
	KCNB2	brown	HIST1H2BJ	turquoise
	TNFRSF10A	green	OGN	turquoise
	UACA	brown	FZD6	turquoise
	P2RY6	brown	P2RY11	turquoise
	MGLL	green	TRUB2	turquoise
	AURKB	green	SMOX	turquoise
	OAS2	brown	POLR2L	turquoise
	BCL6B	green	ZC3HAV1L	turquoise
	TMEM186	green	DOCK3	turquoise
	POLL	brown	CD320	turquoise
	IRS2	green	MRPL12	turquoise
	SLC6A1	green	SHC1	turquoise
	TRIP10	green	ASB9	turquoise
	CCL21	green	ERGIC1	turquoise
	THBD	green	CCDC43	turquoise
	HMOX2	brown	CEP76	turquoise
	FBXO9	brown	HCFC2	turquoise
	CXCR4	green	HAMP	turquoise
	KIAA0408	green	AASDHPPT	turquoise
	PTGFRN	brown	THYN1	turquoise
	FGG	green	ZNF625	turquoise
	ZNF326	brown	GPR143	turquoise
	LAX1	green	ZNRF2	turquoise
	HP1BP3	green	PON3	turquoise
	TNIK	brown	P4HA1	turquoise
	DUSP8	green	GABRE	turquoise
	IL33	green	PTPRE	turquoise
	NRM	brown	CAMP	turquoise
	RTN2	green	COL4A4	turquoise
	EBAG9	green	NOM1	turquoise
	TMEM37	green	CA8	turquoise
	ELP4	green	HLA-G	turquoise
	PSKH1	brown	MRPL28	turquoise
	SIPA1	brown	HERC4	turquoise
	TNNT2	green	AZIN1	turquoise
	SFMBT1	green	CCBE1	turquoise
	SHROOM4	green	FAS	turquoise
	TSPAN15	brown	NR1H4	turquoise
	HP	green	MBNL1	turquoise
	VEGFC	green	PBX4	turquoise
	DUSP6	brown	TCEAL4	turquoise
	MBTD1	green	CDC37L1	turquoise
	HTR2B	green	SLC12A8	turquoise
	CEACAM5	brown	LOC285074	turquoise
	CRABP2	brown	TRIM63	turquoise
	IL2RA	green	PPP2CB	turquoise
	POGZ	green	VAX2	turquoise
	HBD	brown	TPSG1	turquoise
	INMT	green	HHEX	turquoise
	SPP1	green	PALM2-AKAP2	turquoise
	PPFIBP1	green	OR52N2	turquoise
	TRIM37	green	LRMP	turquoise
	CA13	brown	SIRT1	turquoise
	MCC	brown	FURIN	turquoise
	SIGLEC12	brown	ALKBH7	turquoise
	DBNDD1	brown	ST6GAL1	turquoise
	SMA4	green	FANCF	turquoise
	PLA2G5	brown	NCOA1	turquoise
	TOM1L1	green	POMC	turquoise
	TUBB2B	brown	DHDH	turquoise
	GEMIN7	brown	SPATC1	turquoise
	CLSTN2	green	TK2	turquoise
	PEMT	green	FGF12	turquoise
	NBR2	brown	ATP9B	turquoise
	IVD	green	SLC19A1	turquoise
	RPS7	green	PER2	turquoise
	DKK3	brown	TRERF1	turquoise
	SLC35F2	green	TRPC6	turquoise
	EPB41	green	MVD	turquoise
	ZFP42	green	HAPLN3	turquoise
	NUDCD3	brown	LOC606724	turquoise
	LRRK2	brown	GADD45GIP1	turquoise
	PAFAH1B2	green	ATP2B1	turquoise
	EPHA4	green	CDK2	turquoise
	PIP5KL1	brown	TMOD4	turquoise
	NPEPPS	brown	TCN2	turquoise
	PTPN7	brown	CDH20	turquoise
	FGD4	green	MEOX2	turquoise
	HERPUD1	green	UFM1	turquoise
	RHOF	brown	WDR48	turquoise
	SLC45A3	green	TRIM35	turquoise
	CYP1A2	brown	CLIC4	turquoise
	AMACR	green	HEPH	turquoise
	PRICKLE1	brown	AR	turquoise
	ABHD3	green	ILF3	turquoise
	MINK1	green	SALL2	turquoise
	VSNL1	green	HOXB7	turquoise
	OR1J1	green	CEP63	turquoise
	BCAT1	brown	METTL7A	turquoise
	COL23A1	brown	SACM1L	turquoise
	RABL3	green	PYCARD	turquoise
	RASL11B	brown	GJB2	turquoise
	BST1	green	ZNF92	turquoise
	DSCR10	brown	PTPN18	turquoise
	IL6R	brown	LIFR	turquoise
	TBL3	brown	ZNF83	turquoise
	SYNJ2	brown	TMEM71	turquoise
	FOXQ1	brown	ITGB3BP	turquoise
	TPPP	brown	BMP2K	turquoise
	HYPK	green	PSMA3	turquoise
	CACNB2	brown	KLF3	turquoise
	SLC7A4	brown	SUMO2	turquoise
	TARP	green	IL1RAP	turquoise
	DUSP10	green	CCT4	turquoise
	CBX5	brown	ZNF420	turquoise
	PTPRN2	brown	GCC2	turquoise
	USP1	brown	ADAM19	turquoise
	SAMD10	brown	SNX8	turquoise
	WIF1	brown	CSMD2	turquoise
	CD22	brown	CDK2AP2	turquoise
	MLLT11	green	SMAD9	turquoise
	TBX5	green	TPK1	turquoise
	KIF5C	brown	NRXN3	turquoise
	FADS3	brown	SASS6	turquoise
	MYO5A	brown	CASP9	turquoise
	NRIP2	brown	THNSL1	turquoise
	RASD1	green	UAP1L1	turquoise
	RBP5	brown	ZFAND3	turquoise
	STK32C	brown	FAM24B	turquoise
	KIF3C	green	PREPL	turquoise
	PGBD3	green	NRN1	turquoise
	NTRK2	brown	RBM15B	turquoise
	GPR35	brown	RIF1	turquoise
	MRC1	brown	RAG1	turquoise
	ZDHHC15	brown	LDHB	turquoise
	HOXC4	brown	SERINC3	turquoise
	DCP1B	brown	TPX2	turquoise
	ATP8A2	brown	STAP2	turquoise
	FBLN5	brown	RBM7	turquoise
	LRRC15	brown	TRA2A	turquoise
	MAG	brown	ILK	turquoise
	IL11	green	ARRDC4	turquoise
	NLGN4X	brown	APOL1	turquoise
	EPHA1	brown	LSM5	turquoise
	PCDHB12	green	TRAF5	turquoise
	PTCD2	green	RAD54B	turquoise
	GTF2E1	green	IBTK	turquoise
	TNFRSF8	brown	LRIG3	turquoise
	NDP	brown	IER3IP1	turquoise
	SLC9A4	green	DHX33	turquoise
	ALAS2	brown	TPP2	turquoise
	ZNF20	brown	NNT	turquoise
	CNTNAP2	brown	UGT2B17	turquoise
	DCLRE1C	green	TDRD6	turquoise
	ABCA5	brown	ROBO1	turquoise
	LDB3	brown	GPBP1L1	turquoise
	NPTX2	green	LAMB1	turquoise
	TCF21	green	APOH	turquoise
	SLC22A15	green	KITLG	turquoise
	KLRC1	green	SKP2	turquoise
	EDNRA	brown	VPS26A	turquoise
	NMNAT2	brown	TAZ	turquoise
	DPP6	brown	MTPN	turquoise
	PHACTR2	brown	HOXB2	turquoise
	FYTTD1	green	NEUROG3	turquoise
	BAG1	brown	GPD2	turquoise
	PARD3	brown	SEMA5A	turquoise
	PFN4	brown	OPA1	turquoise
	CST5	brown	OTOF	turquoise
	MYO3B	green	CDC20	turquoise
	TRAPPC6A	brown	TTC7B	turquoise
	RTN4RL1	brown	CCNH	turquoise
	FRAT1	green	SDHD	turquoise
	TBCC	green	KCNN2	turquoise
	SSH1	brown	SLC5A3	turquoise
	SUPT7L	green	CTR9	turquoise
	KLF10	brown	MFAP5	turquoise
	ZCCHC12	green	LGALS4	turquoise
	RCBTB1	green	DTNA	turquoise
	CBFA2T3	green	HK3	turquoise
	FZD1	brown	PPAN	turquoise
	EHF	brown	TUBA3D	turquoise
	ZNF14	green	FGF1	turquoise
	CHPF	brown	HYI	turquoise
	SAMHD1	green	RHOBTB1	turquoise
	TIMP4	green	HSPB6	turquoise
	ASRGL1	brown	ECSIT	turquoise
	FAM98C	brown	TTYH2	turquoise
	ABHD5	brown	STX17	turquoise
	ZNF350	green	HOXA10	turquoise
	OR52I1	brown	EXT1	turquoise
	TBC1D10C	brown	EDNRB	turquoise
	CXCL5	brown	RNF41	turquoise
	PGM5	brown	PDE7B	turquoise
	SHB	brown	ZBTB44	turquoise
	USP12	brown	FRY	turquoise
	CDC42EP1	brown	PLA2G6	turquoise
	ERCC2	brown	XPO4	turquoise
	KIR2DS5	brown	ZNF695	turquoise
	CYP2C18	green	CDCA5	turquoise
	TXN2	brown	CNGB1	turquoise
	PTPN13	brown	VMO1	turquoise
	UCK2	green	FBXL8	turquoise
	PCBP3	brown	GSS	turquoise
	CHRNA3	brown	GNRH1	turquoise
	CHN2	green	CD46	turquoise
	FOSB	brown	VTI1B	turquoise
	KLHDC1	brown	PIK3CA	turquoise
	CARD6	green	TMEM127	turquoise
	HOXD1	brown	JPH4	turquoise
	LCAT	green	CA5B	turquoise
	OGG1	green	PRELID1	turquoise
	HLA-DRB4	brown	ERC1	turquoise
	IL1RAPL1	brown	ZC3H15	turquoise
	GATM	green	SLC7A8	turquoise
	RRAS2	brown	CDK5	turquoise
	SH2D2A	brown	BLM	turquoise
	PHGDH	brown	NUDT16L1	turquoise
	KRT8	brown	KCNN3	turquoise
	SLC45A1	brown	CHURC1	turquoise
	CDC42SE2	brown	MDN1	turquoise
	ZNF217	brown	PCDHA2	turquoise
	STC1	brown	GSTM4	turquoise
	SLC16A9	brown	HOMER1	turquoise
	SLC25A37	brown	DENND2D	turquoise
	LRRFIP1	green	CRAT	turquoise
	LGR4	brown	ZNF354B	turquoise
	GALNT5	green	EED	turquoise
	PRKACB	brown	LPL	turquoise
	MT1H	brown	CENPJ	turquoise
	ZNF121	brown	ATP1B2	turquoise
	ABLIM3	brown	USP7	turquoise
	KCNJ15	brown	OR2W3	turquoise
	CD1A	green	TCP1	turquoise
	ERRFI1	brown	SEMA4F	turquoise
	PRKG2	green	CCDC121	turquoise
	CD36	brown	GNE	turquoise
	CHEK1	green	DST	turquoise
	LAT	brown	GABBR2	turquoise
	SLC2A9	green	CPNE5	turquoise
	MLKL	green	OR51F1	turquoise
	XRCC3	brown	ZNF608	turquoise
	NR1H3	brown	NR1D2	turquoise
	SPIN2B	green	PLA2G12B	turquoise
	MPZL1	green	EAF1	turquoise
	SATB2	green	TCEA1	turquoise
	ST3GAL3	brown	HSPA2	turquoise
	IRAK1BP1	green	RUFY2	turquoise
	NARF	brown	RABGEF1	turquoise
	FEM1B	green	SAMD9L	turquoise
	RPS26	green	RANBP2	turquoise
	UBE2C	green	ABCA10	turquoise
	IGSF3	brown	HDAC1	turquoise
	ALG10	green	TRPC1	turquoise
	GSTM5	brown	PRTFDC1	turquoise
	TM4SF18	green	ZNF671	turquoise
	PGPEP1	brown	NEK2	turquoise
	PKLR	brown	PDAP1	turquoise
	THY1	brown	GCHFR	turquoise
	SFMBT2	brown	SUMO1	turquoise
	WDR46	brown	SLITRK2	turquoise
	SDCCAG8	green	CREB3L4	turquoise
	RNF180	brown	ZNF273	turquoise
	TES	brown	SLC30A5	turquoise
	RARRES2	brown	MET	turquoise
	TNFRSF4	brown	CCDC50	turquoise
	ZDHHC13	green	RAD21	turquoise
	PROKR2	brown	LATS1	turquoise
	RGS17	brown	BVES	turquoise
	ZNF432	green	CD1C	turquoise
	ADCYAP1	green	NEBL	turquoise
	LARS2	green	OLFML2B	turquoise
	TOP2A	green	LHPP	turquoise
	BAAT	green	ARID4A	turquoise
	NQO2	brown	GCLC	turquoise
	PEG3	brown	FUT8	turquoise
	TMIE	brown	AKR1C3	turquoise
	CYGB	brown	ERCC3	turquoise
	PPARGC1B	brown	RBP4	turquoise
	CAMK2N1	brown	SMARCA5	turquoise
	COG7	brown	PIK3R1	turquoise
	NLRP8	green	XKRX	turquoise
	CEACAM8	brown	PTGES3	turquoise
	VPS37D	brown	MLF1	turquoise
	ZFP37	brown	SV2A	turquoise
	ECE1	brown	LEF1	turquoise
	RRS1	green	PTER	turquoise
	PCDHB9	green	TMEM25	turquoise
	ZNF77	green	USP47	turquoise
	NAGA	green	MPND	turquoise
	PTCHD1	brown	KIF20A	turquoise
	CLEC4M	brown	DUSP18	turquoise
	SFTPA2	brown	CNIH4	turquoise
	BLZF1	green	PPP1R9A	turquoise
	A4GNT	brown	DPYD	turquoise
	GTF2H4	brown	ASB13	turquoise
	FGF18	brown	NEIL1	turquoise
	PSTPIP1	brown	NUCB2	turquoise
	ARNTL	green	ST3GAL6	turquoise
	HOOK1	brown	CDH11	turquoise
	SLC6A20	brown	CHMP7	turquoise
	IL17RD	green	AGRP	turquoise
	CMKLR1	green	CD44	turquoise
	ETV2	green	CLN3	turquoise
	ZNF577	green	OR52D1	turquoise
	SNX25	brown	MCF2L2	turquoise
	KDELR2	green	EIF1AY	turquoise
	DUSP19	green	SCIN	turquoise
	PGGT1B	brown	SNX14	turquoise
	MMEL1	brown	MIB1	turquoise
	EID2B	green	PLEKHN1	turquoise
	RBL1	green	CNOT10	turquoise
	CCDC8	brown	FIS1	turquoise
	DMPK	green	MYO1B	turquoise
	TGM1	green	TAF5L	turquoise
	ANXA10	green	ZNF684	turquoise
	FAM43B	brown	AVPR2	turquoise
	RANBP3L	green	LRRC20	turquoise
	SNX15	green	PPP4R1L	turquoise
	ORM1	green	HTR1E	turquoise
	DDX6	green	ROCK1	turquoise
	DPT	brown	DPYS	turquoise
	ASPM	green	LENG9	turquoise
	GLCCI1	green	RPSA	turquoise
	SESTD1	brown	CEP57	turquoise
	TCEAL2	brown	RAP2C	turquoise
	REM1	brown	HIF1A	turquoise
	SOST	brown	SLC12A6	turquoise
	VGLL3	brown	TFPT	turquoise
	RTN4R	brown	ADAMTS3	turquoise
	CCL17	green	ITM2A	turquoise
	MN1	brown	MAP3K3	turquoise
	STAG3	brown	STX18	turquoise
	ALG1	green	NCR3	turquoise
	SLC2A6	brown	GDF15	turquoise
	PRC1	green	LMO2	turquoise
	LIMK2	brown	BUB3	turquoise
	HBQ1	brown	SH2D4A	turquoise
	CXCR6	green	TMEM54	turquoise
	GOLGA2	brown	CYP4B1	turquoise
	SSTR2	green	RASGEF1B	turquoise
	TUBB3	green	CHML	turquoise
	RNASE6	green	IGF1	turquoise
	ALDH16A1	brown	TMEM31	turquoise
	SCNN1D	brown	SPAG1	turquoise
	TNFSF8	green	LEO1	turquoise
	FLNC	green	TMLHE	turquoise
	PLEKHG1	brown	FAM49B	turquoise
	RIN1	brown	LSM14B	turquoise
	CEP170	brown	PTPRG	turquoise
	CASP7	green	NEK4	turquoise
	MASTL	brown	LYST	turquoise
	MCCD1	brown	COG3	turquoise
	POLQ	brown	ADD3	turquoise
	SLC9A3R2	green	MALT1	turquoise
	ITSN1	green	SOS1	turquoise
	REST	brown	ZNF644	turquoise
	CHAF1B	brown	BCLAF1	turquoise
	PICALM	brown	RPN2	turquoise
	JDP2	green	ZNF493	turquoise
	ZC3H12B	brown	CHI3L2	turquoise
	DMRTA1	green	MBP	turquoise
	KCTD11	green	DDX17	turquoise
	ESR1	green	PMAIP1	turquoise
	ALPP	green	PLOD2	turquoise
	ATP8B4	green	BICD2	turquoise
	HIST1H4H	green	TCEA2	turquoise
	SLC25A40	green	KCNJ10	turquoise
	TNNI2	brown	HOXC6	turquoise
	HSD11B1	green	HIST1H2BC	turquoise
	TCL1B	green	PIK3C3	turquoise
	TWIST1	brown	ACSL4	turquoise
	FNBP1L	brown	STK17B	turquoise
	AQP11	green	ZNF555	turquoise
	RUNX2	green	DHCR24	turquoise
	GOLGA8B	green	ARHGAP20	turquoise
	NR2C2	brown	SSR3	turquoise
	ABCC9	brown	UGT8	turquoise
	IGF2BP1	green	ALMS1	turquoise
	LAMP3	brown	UBD	turquoise
	RPP25	green	KRTCAP2	turquoise
	ZMAT5	green	CAPN11	turquoise
	RDH5	brown	ZNF468	turquoise
	EPHB3	brown	GATA3	turquoise
	MEST	green	OR2A20P	turquoise
	RTP1	brown	ZFP1	turquoise
	BTG2	green	TRIM25	turquoise
	GUF1	green	LTBP1	turquoise
	TUFT1	green	DICER1	turquoise
	DNAJC3	green	PYCR1	turquoise
	CLCN5	brown	BRD1	turquoise
	LIN9	green	BBS7	turquoise
	FREM1	green	DEFB1	turquoise
	NUSAP1	green	PABPC3	turquoise
	OSGIN1	brown	TPM1	turquoise
	IFT81	brown	RABGGTA	turquoise
	GBP1	brown	IGFBP4	turquoise
	SMPDL3B	green	GKAP1	turquoise
	EZH1	brown	OSBPL11	turquoise
	GFM2	brown	PTRH1	turquoise
	DPH3	green	ADNP	turquoise
	HRK	brown	ASL	turquoise
	RHOD	brown	MMRN2	turquoise
	DDX54	green	TSNAX	turquoise
	BEX1	brown	ALDH5A1	turquoise
	CCDC70	green	ZNF343	turquoise
	DENND1C	brown	TIMM44	turquoise
	PLS1	brown	ZNF75A	turquoise
	WNT11	brown	ZDHHC21	turquoise
	EGLN1	green	LIN7C	turquoise
	PDIK1L	brown	ZNF624	turquoise
	ACD	brown	LSM4	turquoise
	RFESD	green	IFRD2	turquoise
	ZNF616	green	GGH	turquoise
	HPSE	brown	CDKN2C	turquoise
	FAM89B	brown	IDS	turquoise
	FBXO22	green	RABL2A	turquoise
	OTP	brown	HSPE1	turquoise
	FCGR3A	green	APBA3	turquoise
	RCN3	brown	CRLF1	turquoise
	ITGB3	brown	NIPSNAP3B	turquoise
	LGALS2	brown	LRRC32	turquoise
	PREB	brown	TTC7A	turquoise
	ADORA3	green	CFHR2	turquoise
	CA1	brown	ZNF124	turquoise
	COMTD1	brown	RSPO1	turquoise
	ANKRD33	green	PPM1D	turquoise
	SPTLC3	green	NDUFA11	turquoise
	TMEM130	green	EBF3	turquoise
	MMP12	brown	C1GALT1	turquoise
	PHACTR3	green	FCRL5	turquoise
	AKR1C2	brown	BTRC	turquoise
	PLA2G2A	green	PAX8	turquoise
	ATP8B1	green	IGFBP3	turquoise
	FHL1	brown	G3BP1	turquoise
	ZFP36	brown	CA11	turquoise
	WDR20	green	FAM76B	turquoise
	SGCA	brown	HMBS	turquoise
	DDX51	green	DKK2	turquoise
	ENAH	brown	ANXA2P1	turquoise
	GEMIN5	green	ANKFY1	turquoise
	ATP2C1	brown	COMMD8	turquoise
	MAF	brown	SUMO1P3	turquoise
	EID3	brown	EOMES	turquoise
	GPRC5B	brown	FGF7	turquoise
	SQLE	green	GTF2IRD2B	turquoise
	UNC5A	green	SULF2	turquoise
	NAP1L2	brown	CTHRC1	turquoise
	MPP2	green	TBC1D3C	turquoise
	HPCAL1	green	TUBE1	turquoise
	GNG2	brown	XRCC4	turquoise
	ITGA10	brown	KCTD12	turquoise
	MYOZ1	brown	ZP3	turquoise
	ALKBH8	green	PSD4	turquoise
	VPS13B	brown	CCNL1	turquoise
	MEIS2	brown	ANAPC4	turquoise
	DDIT4L	brown	TMCC1	turquoise
	KCTD10	brown	DDX3X	turquoise
	FADS1	green	FBXO30	turquoise
	ST6GALNAC6	brown	RBMS1	turquoise
	TGFA	brown	LOXHD1	turquoise
	OTC	green	BIRC3	turquoise
	TAF1	brown	PRMT7	turquoise
	ZNF597	green	BDH2	turquoise
	CST6	brown	NUP188	turquoise
	INPP5F	brown	ATP1A2	turquoise
	KCNK3	green	MTA3	turquoise
	AAK1	brown	PSMD5	turquoise
	CIDEB	brown	NOL3	turquoise
	CATSPER2	green	GNAT1	turquoise
	HOXB8	brown	ADPRHL1	turquoise
	SELL	green	GNB3	turquoise
	IL15RA	green	RNF128	turquoise
	SNAP25	green	BMF	turquoise
	ITGA8	brown	HSPB2	turquoise
	CORIN	green	DYSF	turquoise
	APOBEC3B	green	PGAM5	turquoise
	MDM2	green	CCNA2	turquoise
	SERTAD1	brown	KIFC1	turquoise
	WNT5B	brown	ETF1	turquoise
	PDE6B	green	AS3MT	turquoise
	CYB5R2	brown	ISG15	turquoise
	VIPR2	brown	ZNF714	turquoise
	KCNJ2	green	CORO2A	turquoise
	KRT7	brown	CSNK2B	turquoise
	HLA-DRB5	brown	MIA3	turquoise
	MICAL2	brown	PCDHB15	turquoise
	SNCA	green	WARS2	turquoise
	FBN3	brown	F12	turquoise
	HBG1	brown	BTG3	turquoise
	LAPTM4B	green	SUPV3L1	turquoise
	HLA-DRB3	brown	ZNF384	turquoise
	SEC14L1	green	TNFRSF6B	turquoise
	SPRY1	green	SART3	turquoise
	GALNT2	brown	MAGEF1	turquoise
	TIMP1	brown	TSFM	turquoise
	FN1	brown	PMS1	turquoise
	AGTR1	brown	MOV10	turquoise
	CD8A	green	RAB11FIP1	turquoise
	TBC1D1	brown	GNA14	turquoise
	PLAC9	brown	TSLP	turquoise
	SOX15	brown	NDUFA3	turquoise
	PARD6A	brown	SPINK2	turquoise
	CD2AP	brown	METTL7B	turquoise
	SPCS3	green	SYNGR1	turquoise
	STEAP2	green	ENPP1	turquoise
	MFAP3	green	MOSPD2	turquoise
	UXS1	brown	ZNF703	turquoise
	PCYOX1	brown	GATA6	turquoise
	PNPT1	green	PANK4	turquoise
	RPS23	brown	NPM3	turquoise
	BBS12	brown	PRPF39	turquoise
	AGR2	brown	LRRC29	turquoise
	MSRB3	brown	MAPT	turquoise
	MYL4	brown	UBE4A	turquoise
	MLYCD	green	ANK3	turquoise
	LAG3	brown	ALDH6A1	turquoise
	CNR1	green	GIPC2	turquoise
	CROT	brown	LAYN	turquoise
	ZNF623	brown	MAL	turquoise
	CDC7	brown	CAND2	turquoise
	TMSB4X	green	GAS2L3	turquoise
	ZNF524	brown	CUL7	turquoise
	LEP	green	UBE2L3	turquoise
	POLR2D	green	ZNF354A	turquoise
	DDX28	brown	GMPR	turquoise
	AQP3	green	ZNF181	turquoise
	OXER1	brown	GPR156	turquoise
	PGBD2	brown	ID4	turquoise
	STS	brown	MVK	turquoise
	GFRA2	brown	TSTA3	turquoise
	IFI6	brown	MPPE1	turquoise
	P2RY1	brown	PLK4	turquoise
	CEP55	green	METTL6	turquoise
	CDCA7L	green	CORO1C	turquoise
	AFF3	green	FBXO38	turquoise
	RGPD1	brown	NECAP2	turquoise
	HIGD1B	brown	WNK3	turquoise
	NCAPG2	green	CXCL2	turquoise
	CD200R1	brown	ZNF43	turquoise
	OR2T12	brown	SCN3B	turquoise
	KDELR3	green	SBNO1	turquoise
	TNNC1	brown	CD1E	turquoise
	BAGE3	green	A2M	turquoise
	CINP	green	MBD1	turquoise
	VAV2	brown	NME7	turquoise
	GALNT6	brown	MCM2	turquoise
	RIPK4	brown	ZNF37A	turquoise
	PGLYRP4	brown	TRAFD1	turquoise
	BASP1	green	STK32B	turquoise
	ZNF639	brown	SF1	turquoise
	HDAC11	brown	SUDS3	turquoise
	PCSK1N	brown	LOXL3	turquoise
	NFAT5	brown	CPB2	turquoise
	CLOCK	green	ENTPD4	turquoise
	ST8SIA6	brown	ORMDL1	turquoise
	DNAJC5B	brown	GNB1L	turquoise
	SFRP5	green	MCM4	turquoise
	KCNJ14	green	CDKL5	turquoise
	BRSK2	brown	OTUB2	turquoise
	PMM1	brown	TNNC2	turquoise
	CHRDL2	green	CREB5	turquoise
	HAND1	brown	TOP1P1	turquoise
	FGF9	brown	LYPLA1	turquoise
	DONSON	brown	WDR45	turquoise
	USP19	brown	NBPF14	turquoise
	KLK5	brown	MKS1	turquoise
	GPR1	green	BRI3	turquoise
	SYDE1	brown	CASKIN2	turquoise
	FILIP1	green	ZNF521	turquoise
	PLCXD3	brown	VPS72	turquoise
	ALDH1L2	brown	PLAGL2	turquoise
	PTGDS	green	EVL	turquoise
	WNT5A	brown	SPATA7	turquoise
	TOR1B	green	SMARCD3	turquoise
	ASCL2	brown	RBP7	turquoise
	UHRF1	green	FBXL20	turquoise
	ALB	brown	CBR1	turquoise
	AMFR	green	UBE2T	turquoise
	F10	brown	BTNL9	turquoise
	NRAS	green	SNX24	turquoise
	TESK2	green	PARS2	turquoise
	ENTPD1	green	S100A13	turquoise
	IL15	green	POT1	turquoise
	TYMS	green	MBD5	turquoise
	BBX	brown	PPP1R8	turquoise
	ARF4	green	GDPD1	turquoise
	ALDH1A2	green	HERPUD2	turquoise
	OCA2	brown	CPNE2	turquoise
	THBS3	green	GNAI1	turquoise
	ZNF654	brown	AKTIP	turquoise
	CDKN2D	brown	ZNF658B	turquoise
	TESC	brown	COX7B	turquoise
	ZNF652	green	PEX3	turquoise
	ATP6V1E2	green	MFSD5	turquoise
	PLCB4	green	DPYSL5	turquoise
	CRIP1	brown	LIG3	turquoise
	CLDN5	brown	THAP9	turquoise
	CCHCR1	brown	MTUS1	turquoise
	FNDC1	brown	CDH3	turquoise
	GPRC5A	brown	DDC	turquoise
	FGFR1OP	green	SGCD	turquoise
	OR7E37P	brown	CLCN2	turquoise
	LMOD3	green	DERL3	turquoise
	GPBAR1	brown	FBXW5	turquoise
	USP42	brown	KIAA1147	turquoise
	NLN	green	PNPLA4	turquoise
	TRIM51	brown	NFRKB	turquoise
	HLA-DQB1	green	HAT1	turquoise
	PCDHB4	brown	MMP28	turquoise
	ANXA8L1	brown	VGLL1	turquoise
	FOXC1	brown	DPP3	turquoise
	FUT11	brown	TRAF3	turquoise
	RAB11FIP5	brown	PRPF4B	turquoise
	ASB1	green	HSPBAP1	turquoise
	HSD17B2	brown	SEMA3A	turquoise
	PIP5K1B	brown	COQ7	turquoise
	IER2	brown	CHCHD7	turquoise
	GALNT3	green	MAS1	turquoise
	IFIT5	green	ZIC5	turquoise
	KCNK5	brown	C5	turquoise
	RND2	brown	FAM76A	turquoise
	DSG2	brown	MLX	turquoise
	PNRC1	green	MRPL48	turquoise
	GPR101	green	PEG10	turquoise
	FGFR1	brown	PNPLA8	turquoise
	PIGX	green	PLN	turquoise
	IGSF21	green	EXOSC5	turquoise
	ZNF566	brown	PGAM4	turquoise
	BUB1B	brown	MYO1D	turquoise
	ATP7A	green	OR2A9P	turquoise
	ZNF563	green	ZNF254	turquoise
	BACE2	brown	POLI	turquoise
	CPSF6	brown	ZNF224	turquoise
	LOC399900	green	KPNA3	turquoise
	GPX7	green	NUDCD1	turquoise
	PTN	green	NDUFA9	turquoise
	ITPKA	brown	RDH8	turquoise
	HAGHL	brown	SRPK2	turquoise
	PROK1	green	XAGE2	turquoise
	EGR1	brown	DVL3	turquoise
	POU6F1	green	SLC39A8	turquoise
	OSTM1	green	GPRASP1	turquoise
	TXNDC5	green	GTF2H2	turquoise
	HYAL2	green	SAP130	turquoise
	APOA1	brown	SLC24A1	turquoise
	MUSTN1	brown	NOTUM	turquoise
	GPR3	brown	DDAH1	turquoise
	AMOTL2	green	DAAM1	turquoise
	RIT1	green	SLK	turquoise
	FEV	brown	FNDC3A	turquoise
	FBXL7	brown	HCCS	turquoise
	ENPP3	green	NTN4	turquoise
	MELK	green	CHD6	turquoise
	SEMA4C	brown	DLD	turquoise
	MRPS14	brown	KCNJ4	turquoise
	TBX4	green	SYNE2	turquoise
	ELAC2	brown	RWDD1	turquoise
	RHEBL1	brown	ARID3A	turquoise
	DTX3L	brown	USH1G	turquoise
	FAM43A	brown	PHF23	turquoise
	H2AFX	green	DCBLD1	turquoise
	FXYD1	brown	SLC14A1	turquoise
	ITGA7	brown	ZNF33A	turquoise
	TMEM176B	green	TOR2A	turquoise
	MFGE8	brown	MCFD2	turquoise
	TBC1D23	brown	SMC3	turquoise
	SH2D1B	brown	ALDH18A1	turquoise
	KIF15	brown	COG4	turquoise
	RPP14	brown	TMEM154	turquoise
	FAM89A	green	GPKOW	turquoise
	S100A3	green	SPINK5	turquoise
	KCNE3	brown	NAGPA	turquoise
	SLC10A4	brown	EXOSC4	turquoise
	OR52B6	brown	RPL14	turquoise
	SLC36A1	brown	STK38L	turquoise
	EPHB1	green	RNF138	turquoise
	ATAD3A	brown	LGALS1	turquoise
	SHKBP1	brown	ARMC6	turquoise
	NCF2	brown	TBC1D5	turquoise
	FHL3	green	SYN1	turquoise
	LYPD2	brown	GTPBP8	turquoise
	MCCC2	green	MAPK9	turquoise
	THSD4	brown	MORC4	turquoise
	USF1	brown	RGR	turquoise
	HBG2	brown	PHKA1	turquoise
	RPL39L	green	GCM1	turquoise
	RGS18	green	ANKRD27	turquoise
	TNFSF14	green	DOCK8	turquoise
	ESPNL	brown	KIF18A	turquoise
	TTF2	green	MMP1	turquoise
	PRF1	green	GPC5	turquoise
	TMPRSS11B	brown	HOXB4	turquoise
	CDKN1C	brown	SERPINH1	turquoise
	EZH2	green	PCGF6	turquoise
	HOMER2	green	USP9Y	turquoise
	ANKRD22	green	RRN3	turquoise
	GLIPR1	green	AOC3	turquoise
	RAP2B	green	LSM6	turquoise
	MBD4	green	ATP13A4	turquoise
	ASH1L	brown	EIF4E	turquoise
	MT1X	green	BTBD11	turquoise
	CHRNE	brown	PPP1R16B	turquoise
	EDIL3	brown	FUT3	turquoise
	SETD4	green	CEACAM1	turquoise
	SLC13A4	brown	PSG9	turquoise
	PANK3	green	RPUSD1	turquoise
	GATA5	green	LRRCC1	turquoise
	PPP1R14A	brown	DPP4	turquoise
	MTBP	brown	SLC12A2	turquoise
	TMC6	brown	SKAP2	turquoise
	SIT1	brown	FCRL2	turquoise
	GOLGA8A	green	PKIA	turquoise
	SLC22A6	green	CAPN12	turquoise
	TIGD2	green	SYTL4	turquoise
	BCAS4	brown	AKAP12	turquoise
	CCL24	green	TSC22D1	turquoise
	MERTK	green	PTPN2	turquoise
	PKP1	brown	ODF2L	turquoise
	PHEX	green	SNX7	turquoise
	MAP1B	brown	LARP4	turquoise
	PHC3	brown	CYP46A1	turquoise
	SURF2	brown	HUS1	turquoise
	GRM8	green	FAM20C	turquoise
	HBM	brown	EIF5B	turquoise
	PLAT	green	PRELID2	turquoise
	RPL29	green	SLC27A5	turquoise
	TRMU	brown	CLK1	turquoise
	MRPS35	brown	DISP1	turquoise
	TKTL1	brown	UBQLN2	turquoise
	SLC5A8	green	CCNB1	turquoise
	NEUROG2	brown	MEF2C	turquoise
	CD209	green	HGD	turquoise
	CHODL	brown	SPHAR	turquoise
	N4BP2	green	ARRDC5	turquoise
	CCNT1	brown	POLR2J2	turquoise
	ZNF205	brown	F8A1	turquoise
	RHOH	green	PAK1IP1	turquoise
	FOS	brown	ACSS2	turquoise
	MTMR12	green	LSM10	turquoise
	NMB	green	OR2B2	turquoise
	PEAR1	green	RANBP9	turquoise
	DCK	green	SNAP23	turquoise
	BRAF	brown	RSU1	turquoise
	KIAA1324L	green	NBL1	turquoise
	KIT	brown	MICB	turquoise
	ACTN2	brown	RICTOR	turquoise
	DNAJC16	green	WIPF1	turquoise
	MEIS3	brown	EXOC8	turquoise
	JUN	brown	SULT1C2	turquoise
	ANKRD44	green	THAP7	turquoise
	RSC1A1	green	SLTM	turquoise
	OPRK1	brown	TPR	turquoise
	SF3B3	brown	TSPAN2	turquoise
	CLEC5A	green	ARF6	turquoise
	CTSK	green	PRKD3	turquoise
	ZNF317	brown	SLC33A1	turquoise
	ETNK2	brown	GLYCTK	turquoise
	SERPIND1	green	GBP3	turquoise
	OR2A14	brown	TRIM45	turquoise
	SNRPD3	brown	SYT4	turquoise
	PRELP	green	PC	turquoise
	ZNF397	green	ANKRD1	turquoise
	SLC5A9	brown	ZFP36L1	turquoise
	KCNH4	brown	DTL	turquoise
	PLA1A	green	SPAST	turquoise
	SLC25A36	brown	TMEM86A	turquoise
	KIR3DL2	brown	BNIP1	turquoise
	PDGFRA	brown	POMZP3	turquoise
	EEA1	brown	PLEK2	turquoise
	HSFX1	brown	NAPSB	turquoise
	GUCA2A	brown	PPP3CA	turquoise
	SOX17	green	ZNF140	turquoise
	SPATA6	green	RAB8B	turquoise
	TINAGL1	green	DYRK3	turquoise
	SIGLEC11	brown	LRP6	turquoise
	DBF4	green	NUP85	turquoise
	TMEM61	brown	ANXA3	turquoise
	RHBDL3	brown	ADCY6	turquoise
	MCHR2	green	RBM34	turquoise
	SKAP1	brown	EYA3	turquoise
	TREML1	brown	COX15	turquoise
	THOC3	green	AKNA	turquoise
	SLC9A2	brown	SLC9A7	turquoise
	BUB1	brown	TUBD1	turquoise
	SERPING1	green	GNPDA1	turquoise
	MAP3K13	brown	POLD4	turquoise
	TCF7L2	brown	ZIK1	turquoise
	JPH2	brown	LAMA4	turquoise
	NUAK1	brown	GLRX2	turquoise
	ARPC3	green	LRRC40	turquoise
	ZNF543	green	APOBEC3A	turquoise
	IGFALS	brown	LRRC28	turquoise
	MYCT1	brown	AGPAT1	turquoise
	RNF125	brown	AGTPBP1	turquoise
	A4GALT	brown	INPP5B	turquoise
	SLC6A14	brown	NEURL2	turquoise
	TIMM17A	green	OSBPL2	turquoise
	CRNKL1	green	OSGEPL1	turquoise
	GDF11	green	RTP4	turquoise
	CLEC4D	green	GLT8D1	turquoise
	CCDC28B	brown	SPRR1A	turquoise
	SH3PXD2B	green	ARL4A	turquoise
	LMBR1L	green	HDC	turquoise
	STX11	brown	LHFPL2	turquoise
	ANKRD30B	green	PAFAH1B3	turquoise
	TMEM156	green	ZNF708	turquoise
	ADH1A	green	VRK2	turquoise
	ANKRD36	brown	TSN	turquoise
	ASGR1	brown	SLC26A2	turquoise
	STAB1	brown	ARMC7	turquoise
	CCL23	green	ASF1B	turquoise
	C1QTNF7	brown	DYNLT1	turquoise
	PGM3	green	CAST	turquoise
	SRM	brown	B3GALT4	turquoise
	PDK3	green	TATDN1	turquoise
	RELA	green	CALU	turquoise
	DENR	green	PPP2R5A	turquoise
	CDKN3	green	SP3	turquoise
	GSTO2	brown	ALPI	turquoise
	OPHN1	brown	HSPA4	turquoise
	EXPH5	brown	MYBPHL	turquoise
	STARD3NL	green	ZNF681	turquoise
	POP1	green	POLD3	turquoise
	STARD4	brown	SRPX2	turquoise
	NRK	brown	PCDHB11	turquoise
	KIR2DL4	brown	FMO6P	turquoise
	LMTK2	brown	ZFY	turquoise
	TRIM52	brown	RPS4Y1	turquoise
	PNMA2	brown	MRPL30	turquoise
	SRGN	green	RNF168	turquoise
	B4GALT1	green	CLDND2	turquoise
	ALG14	green	ZNF658	turquoise
	ARPC1B	green	NEK6	turquoise
	NUBPL	green	TSPAN6	turquoise
	CISH	brown	CBR3	turquoise
	AEBP1	brown	AQR	turquoise
	PXN	green	CD40	turquoise
	ARRDC3	brown	BMP4	turquoise
	PPP1R3D	green	TIAM2	turquoise
	MBTPS2	green	MAP4K1	turquoise
	PCDH18	brown	DCLRE1B	turquoise
	TDRD1	green	SHPRH	turquoise
	SIDT1	green	ADRA2A	turquoise
	SLC44A3	green	INPP5A	turquoise
	PIP5K1A	brown	PRKX	turquoise
	SLC39A6	brown	NUDT15	turquoise
	P4HA2	green	TMEM63C	turquoise
	B3GNT3	brown	RECQL	turquoise
	DDX27	green	ZNF226	turquoise
	MOCOS	green	ARMCX5	turquoise
	RASA2	brown	GMNN	turquoise
	PELP1	green	KRT16	turquoise
	APOL4	green	LOC650293	turquoise
	EIF2AK4	green	TBC1D3B	turquoise
	NNAT	brown	EI24	turquoise
	IL18BP	brown	CDK9	turquoise
	IL18	green	UBE2H	turquoise
	CTSG	green	MX2	turquoise
	SERINC2	green	GRAP2	turquoise
	WDR25	brown	CAMK1	turquoise
	FBXL16	brown	EGFLAM	turquoise
	TAF15	green	TARBP2	turquoise
	ABCG2	green	EFCAB2	turquoise
	DUSP26	brown	ZNF222	turquoise
	SMPD2	brown	PRKG1	turquoise
	USP49	green	MOS	turquoise
	ADIPOQ	brown	GHRHR	turquoise
	SCEL	brown	SLC35D2	turquoise
	PLEKHA4	brown	NUF2	turquoise
	MMACHC	green	RPAP1	turquoise
	GLRB	green	NFE2	turquoise
	TEF	brown	U2AF1	turquoise
	SH3BP2	green	KIF3A	turquoise
	AMIGO1	brown	ARHGAP12	turquoise
	DNAJC17	brown	RABGAP1	turquoise
	ZCWPW2	green	SPAG4	turquoise
	PIK3C2A	brown	TULP3	turquoise
	WFDC1	brown	PMM2	turquoise
	C4BPA	green	XPNPEP2	turquoise
	ZNF600	green	SIRPD	turquoise
	CTNNAL1	brown	LPIN2	turquoise
	ARHGAP5	brown	METTL2A	turquoise
	ANLN	brown	BCL2A1	turquoise
	MDM4	brown	CCNE1	turquoise
	JAG1	brown	IDUA	turquoise
	ZNF346	green	SMURF2	turquoise
	KCNMB4	green	LSAMP	turquoise
	CDH13	brown	CA12	turquoise
	RAB13	green	TRAF7	turquoise
	HEXA	green	SEC24D	turquoise
	LIPG	brown	AKAP9	turquoise
	PLXNC1	brown	CHST3	turquoise
	AHNAK2	brown	TIGD6	turquoise
	AK2P2	green	KIR2DL1	turquoise
	AKNAD1	green	PDK1	turquoise
	ANKRD54	brown	GTF2B	turquoise
	AQP7P1	green	BLCAP	turquoise
	ASPG	brown	LAMA3	turquoise
	ATP10B	brown	PLEKHG2	turquoise
	ATRIP	brown	CALB2	turquoise
	AVL9	green	E2F1	turquoise
	B3GNT8	brown	GGT1	turquoise
	BCYRN1	green	AADAC	turquoise
	BSPRY	brown	ANKRD39	turquoise
	C4B	green	TSPAN13	turquoise
	CAPN6	brown	SOCS4	turquoise
	CBWD3	green	ZNF341	turquoise
	CCDC125	green	CYB5D1	turquoise
	CCNJL	brown	FXYD3	turquoise
	CD163L1	green	AACS	turquoise
	CDKN2AIPNL	green	CEP70	turquoise
	CEND1	brown	BARD1	turquoise
	CENPL	green	ULK2	turquoise
	CENPN	green	SPG7	turquoise
	CKAP2L	green	GREB1	turquoise
	CLECL1	green	AMHR2	turquoise
	COL6A6	green	MLH3	turquoise
	CRCT1	brown	AMY2B	turquoise
	CYTIP	brown	UAP1	turquoise
	DENND5B	brown	VPS39	turquoise
	DIS3L2	brown	CENPF	turquoise
	DLGAP5	green	SLC38A2	turquoise
	DMKN	brown	SLITRK6	turquoise
	DNAH6	green	CKMT2	turquoise
	ECSCR	green	ARHGAP10	turquoise
	ELANE	green	NEFL	turquoise
	ETV7	brown	JAZF1	turquoise
	F8A2	green	ITGBL1	turquoise
	FAM135A	brown	GNG10	turquoise
	FAM162B	brown	NAT2	turquoise
	FAM167B	brown	TRIM6	turquoise
	FAM178B	brown	FCHO1	turquoise
	FAM83C	green	NDUFC2	turquoise
	FCRLB	green	ROBO2	turquoise
	FGFBP2	green	SOX30	turquoise
	FLJ20021	brown	PPP1R1B	turquoise
	FLJ45513	green	SCARA3	turquoise
	GINS2	brown	NMUR2	turquoise
	GJC2	brown	HAL	turquoise
	GPATCH3	brown	NOC2L	turquoise
	GPR137C	brown	PRKCQ	turquoise
	GPX8	brown	NOC3L	turquoise
	GSDMC	green	B4GALT6	turquoise
	GSTTP2	green	FMO2	turquoise
	GTF2IP1	brown	METTL4	turquoise
	GTF2IRD2	green	MMP15	turquoise
	H2BFM	green	MMP11	turquoise
	HARBI1	green	ARL6IP1	turquoise
	HBA1	brown	DSCAM	turquoise
	HNRNPA1	green	LRP5L	turquoise
	HNRNPF	green	STEAP3	turquoise
	HNRNPL	green	PTRH2	turquoise
	HNRNPU	green	MYO5B	turquoise
	HRCT1	brown	ERGIC2	turquoise
	HSD17B7	green	HEY1	turquoise
	HSPA6	brown	RASGRP3	turquoise
	IL20	green	PSMB9	turquoise
	ILDR2	brown	ACADS	turquoise
	INTS4	green	RAB15	turquoise
	ISL1	brown	ANK2	turquoise
	ITPRIP	brown	ST7L	turquoise
	IYD	brown	ETV3	turquoise
	KANK1	green	SLC11A1	turquoise
	KANK4	brown	RBBP6	turquoise
	KHDC1	brown	PTBP2	turquoise
	KIAA0040	brown	CCDC85A	turquoise
	KIAA1107	brown	GDPD4	turquoise
	KIF18B	brown	ZNF91	turquoise
	KIF26A	brown	GTF2H1	turquoise
	KLHDC10	brown	RPH3AL	turquoise
	LINGO1	brown	HDDC3	turquoise
	LOC100049716	green	RAE1	turquoise
	LOC100128288	green	NPR2	turquoise
	LOC100129055	green	ACE2	turquoise
	LOC100130298	brown	CD164	turquoise
	LOC100130353	green	NUDT21	turquoise
	LOC100130550	green	USP33	turquoise
	LOC100134868	green	TFAP2C	turquoise
	LOC145783	brown	BLNK	turquoise
	LOC150051	brown	CD48	turquoise
	LOC151457	green	ZFAND1	turquoise
	LOC283683	green	PIGG	turquoise
	LOC339352	brown	ALG13	turquoise
	LOC340357	brown	GJA1	turquoise
	LOC389641	green	TMEM17	turquoise
	LOC389765	green	ZNF585B	turquoise
	LOC390282	brown	ZNF311	turquoise
	LOC400174	green	KLF12	turquoise
	LOC441241	green	ZNF23	turquoise
	LOC441511	green	CASP6	turquoise
	LOC643342	brown	GOLT1B	turquoise
	LOC643373	green	CLTC	turquoise
	LOC643438	brown	NAP1L1	turquoise
	LOC643888	brown	IMPACT	turquoise
	LOC646588	green	MPI	turquoise
	LOC646804	green	MLPH	turquoise
	LOC649305	brown	MORF4L1	turquoise
	LOC727980	green	MTF2	turquoise
	LOC728452	green	ENPEP	turquoise
	LOC728485	green	TOPORS	turquoise
	LOC728715	brown	SLC25A16	turquoise
	LOC728743	brown	CTSB	turquoise
	LOC728811	brown	CNIH3	turquoise
	LOC728975	green	MTG1	turquoise
	LOC729369	brown	POLK	turquoise
	LOC729683	brown	ADM2	turquoise
	LOC729732	brown	OR2A1	turquoise
	LOC729941	green	PIGH	turquoise
	LOC729960	brown	CACNA1I	turquoise
	LOC730268	brown	P2RX1	turquoise
	LPAR4	brown	WWTR1	turquoise
	LYPD6	brown	PRKAB1	turquoise
	MAGED4B	brown	TEX10	turquoise
	MAGOHB	brown	MRPL42P5	turquoise
	MAGT1	green	CABLES2	turquoise
	2024-03-01	brown	SERAC1	turquoise
	METTL14	green	SIRT4	turquoise
	MEX3D	green	CHRNB1	turquoise
	MFSD11	green	MYADM	turquoise
	MGC27382	green	LLGL1	turquoise
	MIR1247	green	TBC1D3G	turquoise
	MIR1915	brown	TNFSF9	turquoise
	MIR21	brown	ADSS	turquoise
	MIR2116	green	WDR44	turquoise
	MIR30C2	green	SENP8	turquoise
	MIR342	brown	UBA2	turquoise
	MIR564	green	ANKRD10	turquoise
	MIR593	green	MTO1	turquoise
	MIR939	brown	RBAK	turquoise
	MPZL2	brown	UMPS	turquoise
	MRPS25	brown	AXIN2	turquoise
	MSTO2P	green	SAMD8	turquoise
	MT1L	brown	FAM50B	turquoise
	MTHFSD	green	TSPAN10	turquoise
	MUC21	brown	NKX3-1	turquoise
	MYOF	green	DLG1	turquoise
	NBEAL2	green	DZIP1	turquoise
	NCAPG	green	FUNDC2	turquoise
	NCKAP1L	brown	TUSC3	turquoise
	NECAB1	brown	AMY2A	turquoise
	NFKBID	brown	CHD1	turquoise
	NIPAL1	brown	RAPH1	turquoise
	NLRP5	green	FPGT	turquoise
	NTM	brown	CHORDC1	turquoise
	NTN3	green	DDHD1	turquoise
	NUDT19	brown	FBXO3	turquoise
	NXNL1	green	TXNL4B	turquoise
	OAZ2	brown	FBXO32	turquoise
	OTUD7B	brown	YIPF4	turquoise
	P2RY12	green	GP9	turquoise
	PACRGL	green	COLEC11	turquoise
	PATE1	green	TLK1	turquoise
	PATE2	green	ABHD2	turquoise
	PATE3	green	SLC25A13	turquoise
	PBRM1	green	APOM	turquoise
	PCDHB19P	green	DDIT4	turquoise
	PER3	brown	CFH	turquoise
	PID1	green	TMEM104	turquoise
	PKD1P1	brown	SH3D19	turquoise
	PKDCC	brown	RTF1	turquoise
	PLD6	brown	DNASE1L3	turquoise
	PLIN2	green	JMY	turquoise
	PLIN5	green	HIST1H4C	turquoise
	PLXNA4	green	ATG3	turquoise
	PPIAL4G	green	AVPI1	turquoise
	PRKCB	brown	ECHDC1	turquoise
	PSMG3	brown	ABCD1	turquoise
	PTGR2	green	CCL26	turquoise
	PTH2R	brown	ZNF80	turquoise
	PUS10	green	SLC40A1	turquoise
	QRFPR	green	ITGA1	turquoise
	RAX2	green	RSAD2	turquoise
	RCAN3	brown	ATF7IP2	turquoise
	RCVRN	brown	FAM122A	turquoise
	REC8	brown	ZDHHC19	turquoise
	RFTN2	green	INPP4B	turquoise
	RINL	brown	GNGT2	turquoise
	RMND5A	green	PPP1R12A	turquoise
	RMRP	brown	CDCA7	turquoise
	RNF19A	green	NUDT6	turquoise
	RNF215	brown	TTLL4	turquoise
	RNU11	brown	LRRC59	turquoise
	RNU1-3	brown	PCDHB16	turquoise
	RNU4ATAC	brown	IRF1	turquoise
	RNU6-1	brown	APCDD1	turquoise
	RNU6ATAC	brown	MRPL19	turquoise
	RNY1	green	NUDT12	turquoise
	RNY3	green	MYL5	turquoise
	RNY5	brown	PHF20L1	turquoise
	RPL22L1	brown	CCL19	turquoise
	RRP1	brown	TRAM1L1	turquoise
	RRP7A	green	DIRAS3	turquoise
	RWDD3	green	HPS1	turquoise
	RXFP1	brown	MKNK1	turquoise
	SCAF1	brown	NUDT4	turquoise
	SCARNA10	brown	NFIA	turquoise
	SCARNA16	brown	ZNF805	turquoise
	SCARNA17	brown	LST1	turquoise
	SCARNA18	brown	GSTT1	turquoise
	SCARNA2	brown	HRC	turquoise
	SCARNA7	green	RASL11A	turquoise
	SCARNA9	green	TXNDC9	turquoise
	SEC14L5	brown	CD3EAP	turquoise
	SGK1	green	MRPL15	turquoise
	SGSM3	brown	SLC30A3	turquoise
	SLAIN1	brown	DDX20	turquoise
	SLC6A10P	brown	RAD17	turquoise
	SLFN12	green	DDX59	turquoise
	SLFN5	brown	B3GNT6	turquoise
	SMAP2	green	GNPTG	turquoise
	SMCHD1	green	EIF2B1	turquoise
	SMTNL2	brown	GRAMD1C	turquoise
	SNORA12	brown	GOLGB1	turquoise
	SNORA16A	brown	LRRC57	turquoise
	SNORA18	green	ACY1	turquoise
	SNORA22	brown	ST3GAL5	turquoise
	SNORA29	green	SCG5	turquoise
	SNORA54	brown	TRIM56	turquoise
	SNORA57	brown	RBM38	turquoise
	SNORA58	brown	MBNL3	turquoise
	SNORA6	green	GIMAP2	turquoise
	SNORD104	brown	NT5DC1	turquoise
	SNORD110	brown	ESM1	turquoise
	SNORD13	brown	EMID1	turquoise
	SNORD14A	brown	CDC73	turquoise
	SNORD25	brown	MYO1C	turquoise
	SNORD30	brown	TSPYL6	turquoise
	SNORD35A	brown	SGSH	turquoise
	SNORD3A	brown	KIF1C	turquoise
	SNORD4A	brown	RPS6KL1	turquoise
	SNORD62B	brown	CD72	turquoise
	SNORD8	brown	ID2	turquoise
	SNORD84	brown	DNAJC4	turquoise
	SNORD89	brown	UBE2B	turquoise
	SNORD99	brown	EIF5A2	turquoise
	SPDYE1	green	SCYL2	turquoise
	SPINT3	green	GAS1	turquoise
	SPNS3	brown	ZFP28	turquoise
	SPOCK1	green	ENDOG	turquoise
	SUSD5	brown	APLP2	turquoise
	TAF12	green	CCDC51	turquoise
	TCHH	brown	RSRC2	turquoise
	THNSL2	brown	PHF19	turquoise
	TIGIT	brown	MAST2	turquoise
	TMEM106A	green	SLC7A2	turquoise
	TMEM132D	brown	ZNF133	turquoise
	TMEM145	brown	DAXX	turquoise
	TMEM163	green	AKAP10	turquoise
	TMEM169	brown	GALNT1	turquoise
	TMX3	brown	ZBTB5	turquoise
	TNFSF12-TNFSF13	green	DENND4A	turquoise
	TPRG1	brown	SYCP2	turquoise
	TRAPPC9	brown	MTDH	turquoise
	TRIL	brown	DR1	turquoise
	TRMT61A	brown	UTY	turquoise
	TRNP1	brown	ID3	turquoise
	TTC36	brown	RGS13	turquoise
	TTC39B	green	UBAP2	turquoise
	TTC9	green	SNX10	turquoise
	TUBB1	brown	ENO3	turquoise
	TXNDC16	green	MCOLN1	turquoise
	UBFD1	green	TOR3A	turquoise
	UCA1	green	HSDL1	turquoise
	UFSP1	green	VKORC1	turquoise
	ULBP2	green	GABARAPL2	turquoise
	ULK4	brown	LIG4	turquoise
	USP27X	brown	SNRPE	turquoise
	UTP18	brown	SLC5A6	turquoise
	VARS2	brown	NEIL2	turquoise
	VOPP1	green	FABP5	turquoise
	VTRNA1-1	brown	ATG5	turquoise
	VWC2	green	CLEC2B	turquoise
	VWDE	brown	MRAS	turquoise
	XAGE1A	green	ABCA3	turquoise
	YLPM1	brown	B4GALNT4	turquoise
	ZEB1	brown	NID2	turquoise
	ZNF282	brown	SMURF1	turquoise
	ZNF286A	brown	MRPL47	turquoise
	ZNF324B	brown	RAP1B	turquoise
	ZNF385D	brown	FOXH1	turquoise
	ZNF486	green	NFE2L3	turquoise
	ZNF702P	green	COL24A1	turquoise
	ZNF716	green	OR3A1	turquoise
	ZNF720	brown	ALDOC	turquoise
	ZNF738	green	ZNF660	turquoise
	ZNF761	brown	TRIM58	turquoise
	ZNF771	green	LEMD1	turquoise
	ZNF775	brown	MAGEE1	turquoise
	ZNF776	brown	MCOLN3	turquoise
	ZNF782	brown	SCAMP3	turquoise
	ZNF784	brown	GNPDA2	turquoise
	ZNF785	green	OXSM	turquoise
	ZNF786	green	FAHD2A	turquoise
	ZNF793	green	IDH3G	turquoise
	ZNF804A	green	FBXO4	turquoise
	ZNF821	brown	RRM2B	turquoise
	ZNF823	brown	LIMK1	turquoise
	ZNF836	brown	PUSL1	turquoise
	ZNF860	green	ZNF76	turquoise
	ZNRF3	green	TCF4	turquoise
	ZSCAN12	brown	SAR1A	turquoise
	ZSCAN5A	green	KCNS3	turquoise
	ZSWIM7	green	TFPI2	turquoise
	ZNF285	brown	SERF1A	turquoise
	CROCCP2	green	DDX43	turquoise
	CELA3A	green	OTUD6B	turquoise
	SRSF10	brown	PLXDC1	turquoise
	C1orf210	green	TIPRL	turquoise
	DRAM2	green	UGT1A3	turquoise
	GBAP1	brown	WDR81	turquoise
	C1orf53	green	IRX6	turquoise
	C1orf229	brown	FRAS1	turquoise
	POTEKP	brown	ACRBP	turquoise
	C2orf27A	brown	POPDC2	turquoise
	C2orf27B	brown	SERPINI1	turquoise
	SP9	brown	BCAS2	turquoise
	C3orf38	green	SLC36A4	turquoise
	C3orf22	brown	SEMA3C	turquoise
	COL6A5	green	R3HDM1	turquoise
	NUDT16P1	green	TSC22D2	turquoise
	C3orf33	brown	KBTBD3	turquoise
	EGFEM1P	green	ZNF132	turquoise
	NCEH1	brown	ITLN1	turquoise
	C4orf36	green	FAM8A1	turquoise
	SLC25A48	brown	SLC45A4	turquoise
	ARHGEF37	green	RGS20	turquoise
	ACOT13	green	CCNB2	turquoise
	C6orf141	brown	PSMD9	turquoise
	CTAGE9	green	SPRY4	turquoise
	SYBU	green	ARL6	turquoise
	C9orf40	green	FKBP10	turquoise
	ZNF883	green	GADD45G	turquoise
	C9orf106	brown	ZNF202	turquoise
	NCS1	brown	KIF7	turquoise
	TPRN	brown	SLC26A4	turquoise
	CELF2	green	CUL3	turquoise
	FAM170B	brown	LCN6	turquoise
	FAM13C	brown	DSEL	turquoise
	DUX4L5	green	DNAJC10	turquoise
	MOB2	brown	SLC39A10	turquoise
	CELF1	brown	SMAD5	turquoise
	FAM180B	brown	RYBP	turquoise
	NEAT1	brown	BMX	turquoise
	IFT46	brown	CLDN4	turquoise
	C12orf60	green	MST1R	turquoise
	CELA1	green	FAM102B	turquoise
	C12orf73	brown	AMY1A	turquoise
	LPAR6	green	RNF149	turquoise
	FITM1	brown	CYP4A11	turquoise
	GOLGA8IP	green	ADAMTS9	turquoise
	C15orf41	green	PCTP	turquoise
	HAUS2	green	NKAP	turquoise
	C15orf48	green	OR2A42	turquoise
	C16orf89	green	NRCAM	turquoise
	CES1P1	green	NPTX1	turquoise
	ARL17A	brown	ANKRD29	turquoise
	C17orf80	green	LRRK1	turquoise
	HAUS1	green	PINX1	turquoise
	KDM4B	brown	SMPDL3A	turquoise
	ZNF737	brown	SLC2A14	turquoise
	RPSAP58	green	TAF1A	turquoise
	C19orf33	brown	KCNJ8	turquoise
	CTU1	green	PLEKHF1	turquoise
	PPP6R1	brown	DNAL1	turquoise
	FKBP1AP1	green	RFK	turquoise
	MAVS	brown	SKIL	turquoise
	C22orf39	green	P2RY14	turquoise
	CDC45	green	OR2W5	turquoise
	POM121L8P	green	PRKDC	turquoise
	ZDHHC8P1	green	POLH	turquoise
	MTFP1	brown	DNAJC5	turquoise
	RPL23AP82	green	APOC2	turquoise
	CT45A3	green	DCTN4	turquoise
	SLC2A3P1	green	SORD	turquoise
	RNU1-1	brown	ZMYND19	turquoise
	ZNF730	brown	ZNF646	turquoise
	HMGB3P1	green	ADH4	turquoise
	STRIP2	green	CNBP	turquoise
	TBC1D31	green	CRB3	turquoise
	HTATSF1P2	brown	CDO1	turquoise
	LINC00957	green	ECM1	turquoise
	WBP1L	green	CEACAM19	turquoise
	DNPH1	brown	RPL7	turquoise
	LDLRAD4	green	ETNK1	turquoise
	SC5D	green	SUSD4	turquoise
	TSR3	green	ZNF383	turquoise
	SMIM8	green	NANP	turquoise
	LINC00667	brown	IMPA1	turquoise
	NXPE3	brown	LAPTM4A	turquoise
	MCMBP	brown	TBC1D3	turquoise
	NDC1	green	TNKS1BP1	turquoise
	RMDN1	brown	SLC35F3	turquoise
	CENPU	green	ZNF630	turquoise
	GPATCH2L	brown	ACTR6	turquoise
	TMEM260	brown	YTHDC1	turquoise
	LGALSL	brown	FAH	turquoise
	SPDL1	green	BMP8B	turquoise
	TMEM242	green	BIN2	turquoise
	EXO5	green	USP25	turquoise
	SMIM3	green	SMCP	turquoise
	WDPCP	green	FMO1	turquoise
	TMEM241	brown	SLC2A8	turquoise
	SMIM20	green	PRDM1	turquoise
	OIP5-AS1	green	ZDHHC2	turquoise
	KNSTRN	green	ST14	turquoise
	ABHD17C	green	CLIC2	turquoise
	GPANK1	green	CD1B	turquoise
	FAM222A	brown	BACE1	turquoise
	PRIMPOL	brown	DFFB	turquoise
	MORC2-AS1	green	DAPP1	turquoise
	TRMT10A	brown	CD200	turquoise
	FAM210A	green	PAPSS1	turquoise
	SLC35G1	green	UGT2B7	turquoise
	PAXIP1-AS1	green	PKP4	turquoise
	SETD9	green	TXNDC12	turquoise
	GUSBP5	brown	CNTNAP1	turquoise
	ZNF667-AS1	green	PLEKHA7	turquoise
	MCMDC2	green	STAC2	turquoise
	LINC00205	brown	BHMT2	turquoise
	ERVW-1	green	CSNK1A1	turquoise
	FAM218A	brown	F11R	turquoise
	KIAA0825	green	SMN1	turquoise
	EXOC3L1	brown	YPEL1	turquoise
	ANKRD36C	green	NPTN	turquoise
	SLC26A4-AS1	green	MON1A	turquoise
	LINC00476	green	CDK3	turquoise
	SOCS2-AS1	brown	KLF15	turquoise
	C1RL-AS1	green	MON1B	turquoise
	HOXA-AS2	brown	B3GNTL1	turquoise
	FAHD2CP	brown	ZNF12	turquoise
	ITPK1-AS1	green	TRAPPC5	turquoise
	RAMP2-AS1	green	RAB18	turquoise
	LINC00452	green	HMG20A	turquoise
	KIF25-AS1	brown	PLAA	turquoise
	LINC00260	green	MMP24	turquoise
	PXDC1	green	TIMM8A	turquoise
	TMEM246	brown	IL17C	turquoise
	SNX29P2	green	COMP	turquoise
	CHMP3	green	MBNL2	turquoise
	CERS4	brown	SPOCD1	turquoise
	TESPA1	green	PDE6A	turquoise
	HEXA-AS1	brown	NDUFB1	turquoise
	MZB1	brown	ZNF304	turquoise
	ACTRT3	brown	F3	turquoise
	SSR4P1	brown	NPR1	turquoise
	DBIL5P	brown	ZNF680	turquoise
	MIR7-3HG	brown	HS3ST2	turquoise
	LURAP1L	brown	YIPF5	turquoise
	ATP6V0E2-AS1	brown	LGALS3	turquoise
	TEKT4P2	brown	EGR2	turquoise
	PGM5-AS1	green	ANXA5	turquoise
	EXOC3L4	brown	MARVELD2	turquoise
	HOXB-AS3	brown	ADAMTSL5	turquoise
	SIGLEC17P	green	PDCD10	turquoise
	FRMD6-AS1	green	TMEFF1	turquoise
	LURAP1	brown	FKBP14	turquoise
	TMEM52B	green	CITED2	turquoise
	HOGA1	green	MICA	turquoise
	GGTLC3	brown	S100A12	turquoise
	VEGFD	green	ACAD9	turquoise
	ACKR1	green	SH2D3A	turquoise
	ACKR2	brown	CDC5L	turquoise
	ACKR4	brown	CABLES1	turquoise
	ADAMTS7P1	green	PSIP1	turquoise
	AOC4P	green	CD160	turquoise
	ATE1-AS1	brown	DNAJB14	turquoise
	CCDC186	brown	DBR1	turquoise
	CCER2	brown	NUBP2	turquoise
	CEMIP	green	BRSK1	turquoise
	CHEK2P2	brown	KCTD18	turquoise
	CTAGE15	green	NEFH	turquoise
	DCANP1	brown	IQSEC3	turquoise
	DYNAP	green	NUDT13	turquoise
	FAM86FP	brown	POLE	turquoise
	FAM90A27P	brown	ARPC5	turquoise
	FGD5P1	green	DACH1	turquoise
	GALNT16	brown	HEXIM1	turquoise
	GGACT	green	CYP2R1	turquoise
	HAS2-AS1	green	NUDT2	turquoise
	HYKK	green	TBX21	turquoise
	KATNBL1P6	green	NIPSNAP3A	turquoise
	LINC00114	green	CTSO	turquoise
	LINC00544	brown	APH1A	turquoise
	LINC00691	brown	CADPS	turquoise
	LINC00921	brown	ALDH1A1	turquoise
	LINC00926	brown	PSMC6	turquoise
	LINC00937	brown	CA3	turquoise
	LINC01205	green	CDCA8	turquoise
	LINC01235	brown	EIF2S1	turquoise
	LRRC75A	green	MGAT1	turquoise
	LYRM9	brown	NLGN4Y	turquoise
	MAP10	green	DECR2	turquoise
	MGAT4D	brown	ANXA8	turquoise
	OSTCP2	green	SRD5A1	turquoise
	PTGES3L-AARSD1	brown	ICAM3	turquoise
	PXYLP1	green	PABPC1	turquoise
	SERPINB9P1	brown	HSP90B3P	turquoise
	SOX9-AS1	brown	ATP11C	turquoise
	SPATA31A1	brown	LIG1	turquoise
	SSUH2	brown	PAPLN	turquoise
	ST8SIA6-AS1	green	BFSP1	turquoise
	UBA6-AS1	green	CYHR1	turquoise
	UTS2B	green	RBBP7	turquoise
	WFDC21P	brown	CLDN19	turquoise
	ZBED6CL	brown	POP4	turquoise
	ASS1P11	green	ZBTB32	turquoise
	BTNL10	green	SELP	turquoise
	CDKN2AIPNLP1	green	EIF4EBP3	turquoise
	CEP295	green	SUMO4	turquoise
	COX6B1P1	green	QRSL1	turquoise
	DND1P1	brown	MED18	turquoise
	DPPA3P2	green	CORO2B	turquoise
	EEF1A1P17	green	YIPF2	turquoise
	ELK1P1	brown	SLBP	turquoise
	FTLP2	brown	SLC25A32	turquoise
	GUSBP8	green	GTF3C5	turquoise
	HMGN1P38	green	CMTM8	turquoise
	HSPD1P1	brown	PRKAR1A	turquoise
	KCNE5	brown	HSPB8	turquoise
	KDM4A-AS1	green	TARBP1	turquoise
	LINC01006	green	HYAL3	turquoise
	LINC01567	green	MLXIPL	turquoise
	METTL15P1	brown	ALG11	turquoise
	MYRFL	brown	RASGRP1	turquoise
	MYZAP	brown	ALDH1B1	turquoise
	NPIPB15	green	VPS37A	turquoise
	NUTM2E	brown	SEMA4A	turquoise
	P3H3	brown	PABPC5	turquoise
	P3H4	brown	PDE8A	turquoise
	PDPK2P	green	SLITRK4	turquoise
	PPIAP29	brown	PCDHB10	turquoise
	PRR13P1	brown	FSD1	turquoise
	PSMC1P10	green	ARL13B	turquoise
	RNVU1-7	brown	SCRN3	turquoise
	RPL26P35	brown	ST8SIA1	turquoise
	RPS26P2	brown	HIST2H2BF	turquoise
	RPS26P55	brown	ITIH2	turquoise
	RPS3AP39	green	CD300LF	turquoise
	SLC29A4P1	brown	BMP7	turquoise
	ST13P13	green	PTMA	turquoise
	TRAPPC2B	green	SAP30	turquoise
	TUBAP2	brown	AMDHD2	turquoise
	TVP23C	brown	SLC9A6	turquoise
	UMODL1-AS1	brown	GIMAP1	turquoise
	VN2R17P	brown	AAAS	turquoise
	WASF4P	brown	MS4A4A	turquoise
	LINC00268	brown	ABAT	turquoise
	WASIR1	green	DHCR7	turquoise
	RNVU1-18	brown	NDUFB7	turquoise
	TIGAR	green	MDGA1	turquoise
	ADGRE3	brown	WTAP	turquoise
	ADGRF1	brown	SECISBP2	turquoise
	ADGRG4	green	GNAI3	turquoise
	ANOS1	brown	ACP6	turquoise
	COQ8B	brown	MEGF10	turquoise
	ERO1B	brown	DUS1L	turquoise
	HACD1	green	FXN	turquoise
	HACD4	green	DENND4C	turquoise
	MCRIP2	green	RPL5	turquoise
	MFSD14C	green	ULK3	turquoise
	MFSD4A	brown	ANGPTL1	turquoise
	MGAM2	brown	JMJD4	turquoise
	MIR4435-2HG	green	KL	turquoise
	NUP58	brown	CPEB3	turquoise
	PLPP7	brown	MAP4K5	turquoise
	PLPPR1	green	CDKN1B	turquoise
	SELENOM	brown	XCR1	turquoise
	SGO2	green	PIAS2	turquoise
	SPOUT1	brown	ZNF430	turquoise
	STUM	brown	ANP32C	turquoise
	TMEM35A	brown	SPPL3	turquoise
	TWNK	green	MAN2A2	turquoise
	WDR97	brown	PTPN14	turquoise
	AFDN-DT	brown	COL21A1	turquoise
	ARMCX7P	green	NDUFS2	turquoise
	ARMH1	brown	ZNF35	turquoise
	ATP5MC1P5	brown	NOD1	turquoise
	ATP5MC3	green	IL1RL1	turquoise
	ATP5MD	green	GMEB1	turquoise
	BASP1-AS1	green	PKIG	turquoise
	CCN4	green	SFPQ	turquoise
	CCN5	brown	TLL1	turquoise
	CGAS	brown	MYC	turquoise
	CIAO3	brown	DNTTIP2	turquoise
	CLEC20A	brown	TBX19	turquoise
	CLTRN	green	LRP4	turquoise
	COA8	green	RIMS4	turquoise
	CPEB2-DT	green	ZFYVE16	turquoise
	CPLANE2	brown	SFXN2	turquoise
	CTBP1-DT	brown	HECA	turquoise
	DUSP8P1	brown	IGSF10	turquoise
	EEF1AKMT4	brown	UQCRC2	turquoise
	EIF3J-DT	green	PPP1CB	turquoise
	FAM238B	green	CBX1	turquoise
	FAM238C	brown	SLC18A1	turquoise
	FAM90A22P	brown	CSDC2	turquoise
	GASK1B	brown	CYP11A1	turquoise
	GET3	brown	IRAK3	turquoise
	GOLGA6L7	green	CARS	turquoise
	HEXD	green	SNHG8	turquoise
	INSYN2A	brown	HKDC1	turquoise
	KIRREL1	green	FGFR1OP2	turquoise
	KYNUP2	brown	EIF1AX	turquoise
	LINC01720	green	NR2F2	turquoise
	LINC01873	green	RAB6A	turquoise
	LINC01949	green	ZNF611	turquoise
	LINC02138	green	CNTN6	turquoise
	LINC02210	brown	KBTBD6	turquoise
	LINC02315	brown	MTHFD1L	turquoise
	LINC02649	brown	PPP2R3B	turquoise
	LINC02716	brown	TMEM128	turquoise
	MAFG-DT	green	ZBTB7B	turquoise
	MAP3K21	brown	SYT3	turquoise
	MEMO1P2	brown	CCL22	turquoise
	MINDY4	brown	CSRP2	turquoise
	MIR193BHG	green	THTPA	turquoise
	MYORG	brown	ANKRD28	turquoise
	OTULINL	green	LNX2	turquoise
	PDCL3P2	green	H2AFJ	turquoise
	PDXDC2P-NPIPB14P	green	CLDN2	turquoise
	PIMREG	green	ACVR2A	turquoise
	PMS2P12	green	IPO8	turquoise
	PPIAP78	green	ELF5	turquoise
	PRXL2B	brown	PLCD1	turquoise
	RAB42P1	green	PIWIL4	turquoise
	RHEX	green	NAALAD2	turquoise
	RNA5S9	green	THUMPD3	turquoise
	RNU6-15P	brown	B3GALT2	turquoise
	RPL21P128	brown	AP2A1	turquoise
	RPL21P68	green	HLA-DOB	turquoise
	RPL23AP45	brown	DDB2	turquoise
	RPS27AP7	green	AATK	turquoise
	RPS27P19	green	EMG1	turquoise
	RSKR	brown	B3GNT5	turquoise
	SELENOTP1	green	RAB33A	turquoise
	SEPTIN10P1	brown	LIPC	turquoise
	SEPTIN8	green	SNORA32	turquoise
	SHLD2	green	CREM	turquoise
	SOD2-OT1	green	MRPL3	turquoise
	STIMATE	green	CLEC4G	turquoise
	TLNRD1	brown	GOLT1A	turquoise
	TMEM121B	green	GLB1L	turquoise
	TMEM273	green	MAGI2	turquoise
	TRK-TTT3-5	brown	HSPA1L	turquoise
	TRQ-CTG1-5	green	STARD5	turquoise
	UFD1	green	PKN3	turquoise
	UPK3BL1	green	FGD5	turquoise
	WHSC1L2P	green	ADPRH	turquoise
	ZNF812P	green	CNFN	turquoise
			BZW1	turquoise
			NIT1	turquoise
			CATSPER1	turquoise
			XYLT1	turquoise
			DMXL1	turquoise
			PPM1K	turquoise
			ADAMTS6	turquoise
			CCDC22	turquoise
			CBWD1	turquoise
			IPO4	turquoise
			CHRNA2	turquoise
			ARHGEF9	turquoise
			COQ10A	turquoise
			UGP2	turquoise
			SOX13	turquoise
			EFS	turquoise
			SOX8	turquoise
			DHX35	turquoise
			AURKA	turquoise
			ABCF3	turquoise
			PLA2G10	turquoise
			PPP1R15B	turquoise
			NME6	turquoise
			SMG7	turquoise
			ZNF225	turquoise
			LOC401357	turquoise
			ZNF599	turquoise
			TRIM43	turquoise
			TYRP1	turquoise
			C4BPB	turquoise
			STX7	turquoise
			SLC9A3R1	turquoise
			NCOA5	turquoise
			FGF13	turquoise
			IQSEC2	turquoise
			ATP11B	turquoise
			DLG2	turquoise
			FADS2	turquoise
			TSEN54	turquoise
			SCML2	turquoise
			PRKAB2	turquoise
			NBEA	turquoise
			TARS	turquoise
			HAAO	turquoise
			SDK2	turquoise
			TXNL1	turquoise
			HDAC4	turquoise
			RNPC3	turquoise
			POLR3K	turquoise
			PFDN4	turquoise
			USP40	turquoise
			ANPEP	turquoise
			PLA2G12A	turquoise
			ANKRD9	turquoise
			MRAP	turquoise
			FGF23	turquoise
			NF1	turquoise
			TRNT1	turquoise
			PHKG2	turquoise
			TBC1D16	turquoise
			ARSA	turquoise
			DDIT3	turquoise
			MAPK13	turquoise
			GLS2	turquoise
			TM7SF2	turquoise
			CLN6	turquoise
			VAPB	turquoise
			KIF11	turquoise
			PSG3	turquoise
			CEBPA	turquoise
			PROCR	turquoise
			CREBL2	turquoise
			SUV39H2	turquoise
			IFNGR1	turquoise
			NOVA1	turquoise
			KRCC1	turquoise
			PKHD1L1	turquoise
			ITGA6	turquoise
			DOK4	turquoise
			KCNS1	turquoise
			RETN	turquoise
			NIPA1	turquoise
			FBXL3	turquoise
			PPIG	turquoise
			CD302	turquoise
			ZNF416	turquoise
			DPP7	turquoise
			PLAGL1	turquoise
			ELOVL3	turquoise
			PKD1L1	turquoise
			ATXN10	turquoise
			LRRC37A2	turquoise
			ALKBH4	turquoise
			TSPYL5	turquoise
			GALNS	turquoise
			NRXN2	turquoise
			RAB3IL1	turquoise
			CHSY1	turquoise
			ADAM10	turquoise
			CLEC11A	turquoise
			AGR3	turquoise
			SERPINA10	turquoise
			ZNF610	turquoise
			ZBTB25	turquoise
			GLI3	turquoise
			TYRO3	turquoise
			SSTR1	turquoise
			GPR19	turquoise
			UCN	turquoise
			ME3	turquoise
			SRF	turquoise
			WDR73	turquoise
			MYO10	turquoise
			TLR3	turquoise
			EPHA8	turquoise
			PIPOX	turquoise
			KLHL2	turquoise
			SPRN	turquoise
			SLC13A3	turquoise
			RORA	turquoise
			TTC9C	turquoise
			RIN3	turquoise
			PIK3CD	turquoise
			HOXD3	turquoise
			PAK6	turquoise
			IFITM4P	turquoise
			YY1	turquoise
			SV2B	turquoise
			SEC23A	turquoise
			PASK	turquoise
			ARL15	turquoise
			TEPP	turquoise
			HSPA1A	turquoise
			CCDC91	turquoise
			GZMH	turquoise
			SF3B5	turquoise
			BOLA1	turquoise
			REPS1	turquoise
			RAD1	turquoise
			DDX49	turquoise
			FASN	turquoise
			TRPC4	turquoise
			CEP152	turquoise
			CD47	turquoise
			THEM5	turquoise
			TMOD2	turquoise
			YWHAG	turquoise
			ELOVL7	turquoise
			GPC6	turquoise
			OAS3	turquoise
			SUCLA2	turquoise
			GP6	turquoise
			TP53I11	turquoise
			SLC15A2	turquoise
			PPCS	turquoise
			PIK3CG	turquoise
			ART4	turquoise
			GHR	turquoise
			CPE	turquoise
			DDX23	turquoise
			CNOT8	turquoise
			NPHP3	turquoise
			SSPN	turquoise
			RBM28	turquoise
			NPNT	turquoise
			SLC22A5	turquoise
			TPRKB	turquoise
			GIMAP5	turquoise
			NINJ2	turquoise
			SEMA3D	turquoise
			ADRA1B	turquoise
			ENSA	turquoise
			GJA4	turquoise
			NCF1B	turquoise
			RENBP	turquoise
			MESP1	turquoise
			EGFL6	turquoise
			SPR	turquoise
			FAM53A	turquoise
			KLF4	turquoise
			ZC3H6	turquoise
			CHCHD5	turquoise
			ISOC1	turquoise
			DGAT2	turquoise
			GNA15	turquoise
			PDZRN3	turquoise
			ACOX3	turquoise
			LOC388955	turquoise
			ANP32A	turquoise
			ZADH2	turquoise
			SLC37A1	turquoise
			FRG1	turquoise
			CLSTN3	turquoise
			PI4K2B	turquoise
			AMZ2	turquoise
			LRRN1	turquoise
			NR2F1	turquoise
			ATP6V1C1	turquoise
			EVI2B	turquoise
			RABEP2	turquoise
			SNORD48	turquoise
			SCLY	turquoise
			PTP4A1	turquoise
			SDSL	turquoise
			USP44	turquoise
			WDR5B	turquoise
			FAM83F	turquoise
			ABCC4	turquoise
			ST6GALNAC5	turquoise
			TTC1	turquoise
			PRRG2	turquoise
			TRPV2	turquoise
			FBXO17	turquoise
			RRAGC	turquoise
			PERP	turquoise
			WWC2	turquoise
			GSTT2	turquoise
			SLA2	turquoise
			SBDS	turquoise
			CPB1	turquoise
			SP6	turquoise
			UNC5C	turquoise
			ZMYND15	turquoise
			VN1R2	turquoise
			PTPN3	turquoise
			TMSB4Y	turquoise
			COL20A1	turquoise
			FKBPL	turquoise
			CLN8	turquoise
			HK2	turquoise
			HIVEP2	turquoise
			NCAM1	turquoise
			CDC42SE1	turquoise
			TGM2	turquoise
			HEMK1	turquoise
			ZNF347	turquoise
			S100A1	turquoise
			FABP3	turquoise
			PCDH20	turquoise
			RAB24	turquoise
			RANBP6	turquoise
			ZNF404	turquoise
			CES1	turquoise
			PCGF3	turquoise
			PTPN22	turquoise
			DYNLT3	turquoise
			GRHL1	turquoise
			HMGCS2	turquoise
			TIA1	turquoise
			SLIT3	turquoise
			PRKY	turquoise
			TRIM62	turquoise
			CEACAM4	turquoise
			ORMDL2	turquoise
			UCHL1	turquoise
			EPB41L2	turquoise
			FH	turquoise
			ETS1	turquoise
			SLC35F1	turquoise
			ZNF699	turquoise
			PLCXD1	turquoise
			KIAA1328	turquoise
			MED8	turquoise
			HIST2H2AC	turquoise
			LY86	turquoise
			CCT6A	turquoise
			PVALB	turquoise
			TRAPPC6B	turquoise
			ATXN1	turquoise
			MAOB	turquoise
			FZD3	turquoise
			GUCY1A2	turquoise
			LGALS12	turquoise
			OR56B1	turquoise
			ENOSF1	turquoise
			CD55	turquoise
			DYNC1LI1	turquoise
			SCAMP5	turquoise
			TMOD1	turquoise
			CRY1	turquoise
			GIMAP7	turquoise
			HOXC13	turquoise
			PHF3	turquoise
			SLC16A14	turquoise
			RPLP1	turquoise
			ZKSCAN1	turquoise
			GAB3	turquoise
			PRR3	turquoise
			SEC24A	turquoise
			NDUFA5	turquoise
			ARMCX1	turquoise
			BLVRB	turquoise
			HDAC8	turquoise
			DCTN6	turquoise
			SCUBE2	turquoise
			FAM78A	turquoise
[truncated: 2,121 more rows]

## Sheet: Supplementary Data 3
	Supplemental Data 3 List of DEGs in GSE47460 and GSE76925
	GSE47460_Genes	GSE47460_logFC	GSE47460_pvalue	GSE76925_Genes	GSE76925_logFC	GSE76925_pvalue
	FGG	1.80643	1.03395e-09	HTR2B	1.6652	3.96729e-11
	RPS4Y2	1.55278	0.00890014	CD19	1.57494	9.76848e-06
	RPS4Y1	1.55205	0.00966403	FGG	1.57004	1.42371e-05
	MMP1	1.4675	1.75632e-09	DPYS	1.52004	9.56748e-08
	CXCL13	1.3291	3.63326e-06	TNFRSF17	1.51208	3.51961e-05
	FCRLA	1.30213	5.66142e-10	COL10A1	1.4793	7.37994e-05
	FDCSP	1.29837	2.61775e-05	COMP	1.47815	5.88456e-05
	COMP	1.20339	3.69925e-11	CHIT1	1.41854	0.00261558
	GREM1	1.11004	1.06038e-07	HS3ST2	1.41176	2.28398e-06
	ITLN1	1.09464	0.000550473	CCL19	1.40572	8.13597e-06
	SPP1	1.09153	5.36912e-07	FCRLA	1.4031	5.90485e-05
	CXCR5	1.08932	5.56201e-11	DAPL1	1.36084	9.21437e-05
	PLA2G2A	1.07186	9.83701e-06	TM4SF19	1.35395	5.9351e-06
	POU2AF1	1.06015	1.58952e-10	TSPAN10	1.35391	1.18486e-05
	FAM30A	1.04622	4.56138e-09	CLECL1	1.34767	6.74236e-06
	DAPL1	1.04579	7.31849e-08	CBLN4	1.33625	0.000361594
	FCRL5	1.03022	1.16844e-09	POU2AF1	1.32889	9.82919e-07
	CRH	1.02713	4.00417e-06	MMP11	1.31977	6.3961e-05
	CYP1B1	1.02229	3.12877e-17	VPREB3	1.31382	9.14998e-05
	CD19	1.00726	2.08362e-09	BLK	1.29037	5.98153e-06
	BHLHE22	1.00425	7.68517e-21	TIMP4	1.27604	8.61952e-07
	DPEP1	1.00299	3.04876e-09	CORIN	1.27512	1.43956e-05
	MZB1	1.00003	4.77592e-10	SPP1	1.25809	5.76561e-05
	IL13RA2	0.995513	2.84568e-09	MMP9	1.25619	6.95799e-05
	CHRDL2	0.991833	8.99292e-08	PLA2G7	1.23181	2.32023e-06
	IGLL1	0.986028	1.04754e-10	CXCL13	1.19509	0.00628287
	CHIT1	0.963494	0.000268621	BHLHE22	1.13684	1.05163e-08
	PNOC	0.943141	1.74775e-11	SCRG1	1.13067	0.00258163
	CEACAM8	0.93254	4.26079e-05	CHRNA1	1.08517	0.00183278
	BNC1	0.931349	6.7569e-06	SLC1A3	1.07542	3.14539e-07
	FGA	0.930265	0.000375579	TRAF3IP3	1.06168	4.85756e-07
	TNFRSF17	0.92232	1.0955e-08	TNFRSF13B	1.03306	0.000423345
	BLK	0.920017	3.75372e-08	SH3PXD2B	1.03161	2.51332e-07
	PLA2G7	0.91548	1.31853e-09	ADAMDEC1	1.02772	0.00204092
	TUBB3	0.900618	5.90482e-07	SELL	1.02465	0.00012609
	COL10A1	0.895625	5.63568e-09	MIAT	1.0222	1.44464e-05
	CCL19	0.891248	2.62103e-07	SRPX2	1.02034	7.92685e-09
	CEMIP	0.87995	5.19215e-14	TMIGD3	1.01646	0.000516398
	CA3	0.867424	3.90438e-10	CIART	1.0085	0.000398807
	ATP6V0D2	0.859451	1.91041e-05	CD5	0.987447	6.0086e-05
	CHRNA1	0.857492	6.79304e-06	NAV3	0.981249	2.22447e-05
	CLC	0.84167	7.23114e-06	JSRP1	0.968304	0.00297248
	DPYS	0.831118	1.88468e-10	SERPIND1	0.954057	0.00863282
	SDS	0.830848	1.25363e-06	RPRML	0.952679	0.00281391
	WT1-AS	0.819526	0.00101267	SLAMF1	0.9508	9.87158e-05
	TIMP4	0.813902	3.45787e-08	CEMIP	0.949958	0.000199371
	HS3ST2	0.788085	2.04278e-08	SCIN	0.947695	3.71569e-07
	PCBP3	0.748685	7.44031e-11	UNC5A	0.947446	1.25901e-05
	XAGE1A	0.747574	0.000476773	FCRL2	0.945647	2.88151e-06
	HOXC8	0.744705	2.62448e-07	HOXC8	0.945445	0.000937315
	CXCL8	0.735171	0.00502611	SEPTIN3	0.944096	1.12055e-07
	OSM	0.731264	9.15127e-05	AMPD1	0.943176	0.00518525
	STEAP1	0.730375	3.08356e-09	FDCSP	0.942722	0.00299499
	JSRP1	0.729319	2.28349e-06	ATP1B2	0.936395	1.32345e-07
	IGDCC4	0.724977	3.62218e-09	EYA3	0.93348	3.73941e-06
	TMEM229A	0.724304	3.78252e-06	NPTX1	0.922634	0.000714254
	MGC16025	0.724243	2.9057e-07	CTSK	0.912668	5.46139e-06
	MSC	0.722782	3.80064e-09	CILP	0.911431	9.27648e-05
	HABP2	0.722657	2.10554e-05	CLTRN	0.910262	1.37937e-05
	WT1	0.721429	0.000808347	DCSTAMP	0.900495	0.00309801
	AHRR	0.721326	7.16856e-06	GFI1	0.896258	7.48812e-07
	TNFRSF13B	0.717132	3.27972e-08	RERGL	0.893049	0.00378164
	SPIB	0.713528	1.36683e-07	ASIP	0.889358	4.83398e-05
	CPXM1	0.711874	2.0065e-05	APOE	0.885708	3.57984e-07
	BDKRB1	0.711521	0.00220737	ALPK2	0.880604	6.49914e-05
	GDF6	0.710614	4.05899e-07	GGT5	0.875142	3.91047e-07
	TM4SF19-TCTEX1D2	0.707533	1.81512e-05	SUGCT	0.871968	0.000152936
	CLEC4G	0.704404	1.98508e-09	DUSP26	0.869152	2.2886e-05
	GJB2	0.702698	7.75432e-05	GZMK	0.863777	1.94447e-05
	CCL7	0.701641	0.000884321	TARP	0.861712	4.15191e-06
	SAA1	0.701261	0.00238398	UBASH3A	0.861143	0.000186854
	RNASE2	0.6964	4.44822e-08	CNTNAP2	0.858833	0.000179732
	SFRP2	0.693775	0.000261484	KRT27	0.857975	7.58479e-06
	AMPD1	0.68898	1.55024e-05	FEM1B	0.857621	4.44144e-08
	BFSP2	0.685474	4.25557e-07	RAMP1	0.853315	6.31609e-05
	CHI3L1	0.683443	4.00345e-07	SMOC2	0.849606	4.57219e-06
	CCL8	0.676691	1.63265e-05	ACTC1	0.845664	0.00379465
	MMP12	0.671008	0.00423189	VNN1	0.844566	0.000374894
	JCHAIN	0.663546	5.80354e-07	TLR10	0.84227	1.66058e-05
	CCL11	0.663349	2.88604e-05	THBS2	0.842202	1.38435e-05
	TDO2	0.659151	1.47076e-05	IRX6	0.836022	1.63966e-06
	GPR78	0.659147	6.53163e-08	DNASE2B	0.832604	0.00293171
	LIF	0.657183	0.000134619	CYP1B1	0.831538	2.49048e-05
	GAS2	0.654657	1.59808e-10	TRABD2A	0.827183	5.33432e-07
	HOXC9	0.651713	0.00096641	HSD17B14	0.82442	5.44142e-08
	PTX3	0.648966	0.0018645	MSC	0.823084	0.00452151
	DOCK3	0.64372	0.000159267	ZNF101	0.819642	1.26689e-07
	HTRA4	0.63804	9.1946e-05	FCMR	0.81613	3.99064e-06
	SMR3A	0.631558	2.18708e-06	SV2B	0.807722	2.97392e-08
	COL14A1	0.630073	1.55656e-07	TENM3	0.807395	5.04319e-05
	CTSG	0.629207	0.000165935	DIO3OS	0.800494	0.000138881
	HTR2B	0.628899	2.04463e-07	CD27	0.800431	0.000716849
	TSPEAR	0.622573	1.09633e-08	KRT222	0.797715	0.000206511
	SYT4	0.621425	0.00744904	FCGR2B	0.792045	7.76711e-06
	MADCAM1	0.621404	4.01091e-06	ASB16	0.790543	0.0012118
	UPK1B	0.620606	0.000697619	CXCL12	0.788165	7.21338e-08
	PCSK1	0.616082	0.00253951	LOX	0.787594	0.000456428
	SLC28A3	0.612041	3.30222e-05	NPL	0.783076	2.93994e-05
	DHRS9	0.610377	4.90951e-08	MFSD2A	0.782993	0.000242213
	FCRL2	0.607767	1.3794e-05	TMEM130	0.781467	0.00545211
	FER1L4	0.606654	4.15799e-07	CD8A	0.776626	3.82634e-05
	MMP10	0.60472	0.011596	ESPNL	0.77607	0.000337452
	KLK8	0.60354	0.00342718	CHI3L2	0.775355	0.000152898
	ALK	0.602277	0.000209609	GGTLC2	0.768707	0.00104458
	MRAP	0.601351	2.77596e-06	RSPO1	0.768622	0.000857116
	SLC2A5	0.59443	1.1996e-05	TMEM176B	0.767253	2.63598e-06
	CLEC5A	0.589552	5.16713e-07	PCP4	0.764099	0.00237488
	AGTR2	0.586668	0.00625955	PSAT1	0.761008	0.000403866
	NXPE4	0.581848	2.11946e-05	CD3G	0.760673	3.51744e-05
	ASTN1	0.580234	0.000194171	PDCD4-AS1	0.760019	1.64765e-06
	TREM2	0.578758	1.21413e-06	LINC02591	0.756553	5.4052e-07
	MEOX1	0.576548	0.00056609	HP	0.754707	0.00992631
	PCMTD1	0.573581	0.000613086	C2orf88	0.753714	0.000394108
	CD27	0.572667	8.57744e-07	FRZB	0.752777	1.0684e-07
	MMP11	0.570862	0.000215371	PDCD2L	0.752461	1.00748e-08
	SERPINF1	0.570106	1.07047e-09	CXCR5	0.746012	2.85058e-06
	SPAG4	0.567678	1.92528e-07	GPR18	0.743272	0.000127954
	SLC1A3	0.567123	7.3743e-08	GLI2	0.743097	0.000258477
	RPRML	0.564167	0.000979603	SLC29A3	0.739058	1.02604e-05
	CD79B	0.563085	2.29108e-07	DPH7	0.738038	4.52101e-06
	RET	0.560608	1.10673e-10	HSD11B1	0.737412	0.000582907
	CCDC80	0.559251	1.1855e-05	BMF	0.736722	5.99173e-06
	NPTX1	0.55728	7.89013e-05	GAS2	0.734278	0.00268625
	CD180	0.55714	5.73288e-06	ZNF79	0.734225	6.88955e-06
	CTHRC1	0.556263	0.000118893	RASGRF1	0.732064	0.000316103
	CILP	0.553379	0.000343334	SLA2	0.729631	4.86672e-05
	PIM2	0.551309	3.50625e-09	PTGIS	0.724289	3.38031e-05
	HS3ST4	0.550468	5.39724e-05	GEMIN5	0.72195	3.39758e-08
	CR1	0.548861	3.85904e-07	CMKLR1	0.721789	4.03917e-05
	ACBD4	0.548283	0.000214104	CD79A	0.721354	6.09605e-05
	ESR2	0.547621	1.36438e-05	CPZ	0.719786	0.00134507
	S100A9	0.544292	1.33656e-07	CD209	0.717256	0.00108982
	ADAMTS14	0.543917	5.33471e-05	SLC2A5	0.71673	0.000690692
	MMP9	0.54364	0.000273581	RHEX	0.716403	0.00362837
	ALPK2	0.542868	0.00025885	PGBD5	0.714816	3.11371e-05
	ISLR2	0.542309	1.23089e-07	SPAG4	0.713682	0.00145523
	ANKRD30BP2	0.539292	0.000640049	LINC00926	0.712877	0.000264247
	KRT6C	0.53851	0.00539368	VEGFD	0.711852	3.65018e-05
	SCG5	0.537902	0.000858052	GJB2	0.711665	0.011017
	IGFL2	0.536502	0.00346192	PTGER1	0.711245	0.000851913
	P2RX5	0.532701	1.0474e-05	ATF7IP2	0.711204	2.588e-05
	SMOC2	0.53219	1.5431e-07	PVRIG	0.709523	0.000871993
	IL1B	0.52883	0.000360022	STEAP2	0.709416	0.000143775
	CD79A	0.526975	1.88592e-07	MYH3	0.709335	0.00228189
	IRF4	0.524712	1.46742e-05	CR2	0.709185	0.0127732
	TIMP1	0.522415	2.82553e-07	CDCA7	0.705739	0.000291611
	BIRC7	0.52159	0.000937964	RPP25	0.705278	1.35099e-07
	PODNL1	0.519331	3.8419e-07	ACTA1	0.704224	0.00744064
	ECEL1	0.518493	0.000266428	PARP16	0.703261	5.49162e-09
	SCRG1	0.517573	0.00480722	OTC	0.701934	0.00168227
	ZBTB32	0.516591	0.000211892	GREM1	0.700001	0.0100859
	CPA6	0.516552	0.000460539	PNOC	0.699945	0.000542064
	NAT8L	0.514823	3.57455e-06	SIRT4	0.698576	0.000881335
	ZP1	0.513069	6.38102e-06	ELANE	0.695623	0.00747674
	CACNA1I	0.512051	5.73815e-06	SHISA2	0.695596	0.000248073
	SPRR1A	0.506943	0.00115504	HLA-DOB	0.695264	0.000105216
	CTSK	0.502377	4.64259e-07	TMEM117	0.690457	3.26955e-07
	IL2RA	0.50202	0.000157959	TPCN1	0.689979	7.46543e-05
	DIRAS1	0.501301	1.07537e-06	CKMT2	0.68942	5.97182e-05
	FRZB	0.498836	1.66152e-09	ORM2	0.687642	0.010933
	TMEM130	0.498012	4.58708e-05	NEURL3	0.686103	0.00609241
	DSC3	0.496556	0.00118409	SERPINE2	0.686029	4.10272e-06
	TNIP3	0.49635	0.00327217	SLC22A15	0.685791	2.22597e-05
	IL10	0.496316	1.25717e-05	CARD6	0.683216	5.08039e-06
	WNT10A	0.49481	8.5256e-07	HYAL3	0.680517	2.55924e-05
	S100A12	0.49467	0.00322374	FBLN7	0.67933	0.000160184
	CCL13	0.49467	5.6261e-05	TMEM86A	0.677813	1.54521e-05
	FCRLB	0.492227	8.82455e-08	LY9	0.675607	0.000565275
	PCP4	0.492214	2.66716e-05	SLC5A3	0.670952	0.000213051
	SERPINB2	0.485503	0.00131352	MOXD1	0.669751	0.00134478
	ALDH1A2	0.485441	1.7607e-06	CD40LG	0.668379	0.00346247
	GDF15	0.484536	3.87248e-05	CCN5	0.664498	0.000243091
	NR1D1	0.48351	2.49557e-05	HOXB7	0.664398	8.51751e-06
	TNFRSF13C	0.483446	1.83194e-06	P2RY8	0.662956	0.000401797
	CMA1	0.482313	0.000125636	BCL11B	0.661648	0.00129939
	SRRM3	0.482134	2.88395e-07	FAP	0.659393	0.00346128
	ALAS2	0.480788	0.010849	SAMD4A	0.65803	0.000958449
	VWCE	0.480261	4.10971e-06	SDK2	0.657065	3.01729e-05
	FCN1	0.47883	6.23068e-06	ZMIZ1-AS1	0.656687	0.000179937
	STEAP2	0.478601	5.91011e-06	CHRDL2	0.656664	7.76492e-05
	HP	0.477231	0.00334477	SULF1	0.655857	0.000483013
	GPR84	0.476696	3.90732e-05	FCRLB	0.653553	1.79654e-05
	AIM2	0.476536	1.50402e-05	DHRS9	0.653269	0.000130297
	KCND2	0.475726	2.2927e-05	PRSS53	0.653162	0.000162222
	IGF1	0.473896	6.66873e-05	CD1B	0.652631	0.0114957
	PDK1	0.472054	8.68432e-11	ZNF597	0.65216	3.4395e-06
	CDCA7	0.472043	4.74627e-05	SLAMF6	0.651308	6.05482e-06
	CRIM1	0.471931	0.00425832	TMEM177	0.648858	1.94069e-05
	PSAT1	0.470455	3.78488e-06	SPOCK1	0.646627	0.0031627
	PTGES	0.468398	8.40698e-06	COL14A1	0.646012	0.0073472
	PROK2	0.468123	0.0108258	PALB2	0.645982	2.89478e-07
	TMEM154	0.467803	3.59133e-10	RAB33A	0.645284	4.27238e-05
	DOK5	0.467015	1.55859e-05	PYHIN1	0.644743	2.51906e-05
	PODN	0.46531	1.12714e-05	DTX1	0.644176	2.35424e-06
	NLRP7	0.465085	0.001042	IRAK4	0.642113	1.30001e-06
	ASGR2	0.46465	9.98222e-08	PARP15	0.641868	0.000129855
	CD8B	0.463959	1.21217e-05	MYO7A	0.641144	0.000100814
	TNFRSF10C	0.463797	1.25696e-07	AIFM2	0.640198	1.6092e-07
	SERPINA3	0.463692	0.000173416	HES2	0.639038	0.00282327
	CCL3L3	0.463306	0.00141476	KAZALD1	0.638634	7.44449e-05
	RNASE3	0.463028	3.50732e-05	ZNF77	0.638598	1.7087e-05
	KCNH8	0.462982	0.000447559	C5orf46	0.637063	0.000466136
	SERPINE2	0.462364	9.68523e-07	MRVI1	0.635827	0.00358809
	AZGP1	0.461417	0.0039956	HHIP-AS1	0.633791	0.000286922
	CPNE5	0.460614	1.21588e-05	FBXL8	0.633172	2.55999e-05
	NPTX2	0.458799	0.00433823	SNORD48	0.632482	0.00911941
	PDE1A	0.453869	2.84993e-07	CST1	0.632341	0.00965128
	ZNF843	0.453032	0.000185811	NCAM2	0.631537	0.00132054
	SULF1	0.451696	1.82349e-05	MGARP	0.630928	0.00374505
	NNMT	0.451688	0.000169592	METTL16	0.629441	0.000477696
	CCR3	0.448238	0.00125822	ORM1	0.628978	0.0125763
	FHL2	0.447849	4.44954e-05	SNORD69	0.626855	0.00961457
	DNAJC5B	0.447848	0.000233218	ART4	0.625574	0.000300635
	SCG2	0.447575	0.00255774	TMEM268	0.624738	1.53533e-06
	GREB1	0.447182	0.00107827	SNORD95	0.623581	0.000596182
	STAB2	0.444865	0.00020947	METTL4	0.623425	6.67253e-07
	GALNT9	0.443396	0.00124093	LGI2	0.622884	0.00023309
	EGFLAM	0.438497	1.35268e-05	ANKRD22	0.622635	0.00213873
	PRSS2	0.437795	0.00105992	UBFD1	0.622363	1.96429e-06
	SLC7A5	0.437642	0.00128704	LINC00426	0.620994	5.44381e-05
	LY6H	0.43706	0.00907314	PTGDR	0.620992	0.000551407
	SLAMF7	0.435776	6.79829e-05	PCBP3	0.61601	0.000156938
	SLC16A10	0.435495	0.00202212	FCN3	0.615971	0.0136209
	SHISA7	0.435455	1.59656e-05	ZNF192P1	0.615554	0.000172631
	ITGA11	0.434837	4.38051e-05	AKAP10	0.615113	1.88769e-05
	MYO7A	0.433973	0.00141405	LPCAT2	0.614195	0.000377695
	NGFR	0.432933	0.000497193	SND1-IT1	0.613095	0.00090403
	CFB	0.431956	2.60177e-06	ZNF605	0.61157	0.000544748
	CCDC177	0.431727	0.000165944	ZNF507	0.611187	1.01806e-06
	OAF	0.431234	6.30887e-07	STAB2	0.611093	0.0089621
	SLC4A1	0.431046	0.00732375	EPHB6	0.610156	0.00065327
	PTGDR2	0.430167	4.98576e-06	KLHL6	0.608005	0.00249295
	CLTRN	0.429607	8.10789e-06	SLC45A3	0.606011	0.000174067
	CD69	0.428599	0.00192061	CHN2	0.6054	6.4863e-08
	PCK1	0.426639	0.00284176	HRC	0.604812	0.00112371
	NRAP	0.425946	0.0017943	CD24	0.604522	0.000865155
	MTHFD2	0.425846	6.49987e-07	MAP4K1	0.604431	0.000513049
	SV2B	0.42582	8.68422e-08	NSG1	0.604047	0.00366342
	FKBP11	0.424884	3.87212e-07	CSPG5	0.603656	0.00133268
	CD28	0.424826	2.63517e-05	RSPO3	0.603229	0.000666027
	PDGFD	0.424283	0.000172621	ARRDC5	0.60105	0.000164982
	FBLN2	0.419817	7.97347e-06	BTRC	0.600944	5.47252e-05
	CCR7	0.419176	0.000121789	NXPH3	0.600787	0.000787654
	GLIS1	0.418421	1.4074e-07	DLG2	0.599853	1.8539e-05
	GPR183	0.416803	0.00088843	RASD2	0.599354	7.1772e-05
	QPCT	0.41645	5.43895e-07	ICOS	0.597958	0.000446922
	ASCL1	0.415759	0.00190147	TEX14	0.597711	0.00859822
	CALB2	0.415673	0.0019701	BIRC7	0.596979	0.000824446
	ZNF680	0.412701	0.000638496	TRIM63	0.596758	0.000517452
	C5orf58	0.412438	1.67341e-05	NCOR1	0.596163	8.56425e-06
	ADGRG3	0.409493	0.00111156	MDN1	0.595895	1.21564e-05
	VCAM1	0.409231	0.00185932	RAD54B	0.595714	1.46751e-05
	TNFRSF18	0.409168	1.49534e-05	PLA1A	0.593341	0.000467349
	ASB16	0.408769	3.65524e-05	FKBP10	0.593242	8.71412e-05
	EPB42	0.408564	0.0035086	CLMP	0.592885	0.00309636
	ELF5	0.408198	0.00552773	COLGALT2	0.59231	0.00111052
	CD1A	0.406824	0.00662079	FER1L4	0.59205	0.00593267
	PPIF	0.406389	1.25597e-07	STEAP1B	0.591506	0.00611785
	RARRES1	0.405985	2.30753e-05	NCR3	0.590794	0.000194995
	STK32B	0.405932	1.82237e-05	TLCD1	0.590165	0.000181757
	IER3	0.405767	0.00197852	CACNA1I	0.590025	0.00037064
	CLECL1	0.405702	0.000306896	NMUR2	0.588073	0.00796025
	RPRM	0.405627	0.00898303	CAMK1G	0.586575	0.00776756
	C21orf58	0.405587	1.03293e-05	NPAS2	0.586318	0.00217944
	NYX	0.404416	1.91208e-05	ADGRG5	0.586205	0.00075166
	POM121L9P	0.40414	7.53142e-05	MTMR12	0.584983	6.64277e-05
	FSTL5	0.403671	0.000309457	BTLA	0.584905	0.0023827
	TMEM156	0.403644	0.000930034	SYNGR1	0.584866	1.5655e-06
	NMU	0.403435	0.01126	SMC1A	0.584663	0.000408383
	ZNF385D	0.403045	0.00287445	CXorf65	0.584598	0.00208298
	SLITRK4	0.402863	7.21794e-06	CDC42EP3	0.583931	0.00730773
	KLHL14	0.402453	0.000463	LCNL1	0.583896	0.000187063
	ATP8B4	0.402404	2.76616e-09	SCAMP5	0.583674	0.00992583
	ACAP1	0.401588	1.10475e-06	NUP210	0.582935	0.00091967
	PNPLA3	0.401545	0.00465362	SUSD3	0.582683	0.00135004
	GLB1L3	0.399845	0.000236457	NHLRC2	0.581655	4.02166e-07
	CDH3	0.399571	0.00271857	KLF15	0.580597	0.00564853
	PTPRZ1	0.39944	0.00762811	ZNF74	0.580096	1.44553e-06
	ZNF215	0.399141	3.39239e-05	PLEKHA3	0.579332	0.00114269
	DTX1	0.398243	2.68417e-06	ROR2	0.579328	0.00122262
	EAF2	0.397889	8.25351e-09	SCARNA9	0.579296	0.00182311
	SAMSN1	0.39647	0.000216299	SVEP1	0.578266	7.25783e-05
	HIF1A	0.395503	4.48348e-06	CRH	0.576464	0.000579789
	FCGR2B	0.395043	4.59662e-06	ZNF510	0.576025	5.88536e-05
	FYB1	0.394408	7.07759e-08	ABCD1	0.574919	0.000651962
	FNDC4	0.393702	9.71692e-05	EMILIN1	0.574511	5.17955e-05
	SLC38A11	0.39293	0.00272023	ZNF702P	0.574238	0.000842041
	G0S2	0.391781	0.000108939	PGBD3	0.573991	2.4234e-07
	HBQ1	0.390203	0.00665202	SMIM8	0.57351	0.000203566
	S100A8	0.389647	0.000661619	ASB16-AS1	0.571751	3.72968e-05
	KCNN4	0.389568	1.36263e-05	ALDH18A1	0.571511	7.83619e-07
	PADI2	0.389501	0.000902803	ZNF814	0.571445	0.000347146
	DCSTAMP	0.388522	0.00331092	LGI3	0.568683	0.0105606
	HRK	0.386718	0.007236	TSHZ2	0.567379	7.56949e-05
	GSC	0.386585	0.00166414	GNB3	0.566381	3.69351e-06
	DUSP2	0.384405	0.00485855	PDIA6	0.564817	0.00101776
	UCHL1	0.384199	0.000209598	FERMT1	0.564765	0.000271614
	TPT1P8	0.384014	5.67725e-06	C1S	0.564555	0.00165244
	RECQL	0.383357	0.00210249	SOS1	0.562883	0.00348197
	C15orf48	0.382432	0.00288343	SEPTIN1	0.562823	0.000192852
	P2RY6	0.381672	1.68782e-05	NF1	0.561014	3.35326e-06
	NPPA	0.381633	0.00089294	DOCK3	0.560145	4.25078e-05
	TBC1D27P	0.380316	0.000369787	ATF2	0.559431	0.00040063
	SNX31	0.380068	0.00530163	SEMA4D	0.559256	4.61957e-07
	WNT1	0.379687	1.10569e-07	BLM	0.558546	0.000200957
	CYTL1	0.379493	0.00299664	SNAI2	0.558297	0.000458815
	NCF1	0.378276	2.48743e-05	PDE6B	0.558042	4.77668e-05
	FAM43B	0.377945	0.0110813	SAMD3	0.557722	5.15404e-05
	CSF2	0.377497	0.00378691	RNASEH2C	0.557426	2.97336e-05
	GPR15	0.377039	3.78561e-07	IER5L	0.557132	0.000230487
	SSUH2	0.376979	0.0029192	PDE3B	0.556611	0.00363859
	COCH	0.376436	0.000389912	EOMES	0.556441	0.00824557
	CPVL	0.375785	5.71576e-09	MYO16	0.555677	1.5789e-05
	ICOS	0.375596	3.25407e-05	DOK3	0.555598	0.00111961
	FMO1	0.375213	0.000440342	SLC46A3	0.555481	4.53658e-08
	RUBCNL	0.374339	1.24134e-05	TMEM37	0.5546	0.000738004
	MIR155HG	0.374222	9.04919e-06	SNAP25	0.554164	0.00298307
	CREB3L1	0.374207	3.4895e-06	MPZL1	0.553607	5.82126e-05
	ATG9B	0.374184	0.0125236	TTC7B	0.553191	3.45519e-05
	NKAIN2	0.373217	0.0110716	MIR100HG	0.55273	4.51415e-07
	MOXD1	0.37293	8.62605e-06	ADPRM	0.552454	6.65503e-06
	MIAT	0.3727	3.39554e-05	LOC441241	0.552034	0.000449061
	WNT6	0.372195	3.12595e-07	SCARNA3	0.551789	0.00391909
	GPNMB	0.372026	1.50864e-05	AEBP1	0.551426	1.22921e-05
	HPSE	0.372004	1.17695e-05	HEXA	0.550964	0.000244746
	PAMR1	0.371792	0.00120957	GLRB	0.549963	0.00326165
	SLC7A10	0.371665	0.00402061	C9orf152	0.549443	0.00429789
	CXCL12	0.37122	2.80495e-05	WHSC1L2P	0.549056	5.18629e-05
	RUNX1-IT1	0.370985	9.3201e-09	YTHDC2	0.548859	0.000342026
	CHL1	0.370913	0.000395252	CNTLN	0.547601	3.84403e-05
	BLNK	0.370857	5.09543e-07	TMEM266	0.547357	0.00178147
	C12orf42	0.370391	0.00100843	CHCHD6	0.5469	0.000449864
	SCN1B	0.370122	5.97517e-07	MRAS	0.545805	6.09655e-05
	MS4A2	0.369814	0.000685603	GATM	0.54535	0.00405923
	CD48	0.369369	5.84023e-07	CD3D	0.545039	0.000264643
	TNFSF13B	0.369061	1.88522e-08	CHMP7	0.544849	0.000106003
	NMRAL2P	0.368551	0.00575824	CARMIL2	0.542727	6.01203e-05
	C4B	0.368144	1.47529e-05	GSTM4	0.542626	4.49385e-06
	RAB3IL1	0.368037	1.89067e-07	ANKRD55	0.542563	0.000375011
	LY96	0.367634	1.31438e-09	EPHB1	0.541759	0.000420672
	SOAT1	0.367544	1.37768e-09	ARIH2OS	0.541023	0.000337752
	SRPX2	0.367388	7.24031e-07	ZNF350	0.540051	7.46644e-06
	NEK6	0.367289	4.57818e-10	TLN2	0.539898	0.00137829
	BCL2A1	0.36699	3.2141e-05	CLSTN2	0.539645	0.00258389
	CNR2	0.366746	2.1212e-05	RRP1B	0.538674	4.81028e-05
	MACROD2	0.366382	0.000396327	RNF214	0.538238	3.51265e-07
	GPR18	0.366363	0.000242273	EAF2	0.537975	0.000447885
	SALL4	0.36628	0.000454979	CAPN11	0.537619	0.00208286
	VNN2	0.36585	0.000210053	UCHL1	0.537617	0.00827613
	SCAMP5	0.36378	3.14195e-05	ACAP1	0.537371	0.00153055
	CD22	0.362736	4.88425e-05	BEAN1	0.537111	0.00919125
	PLAU	0.361556	7.43303e-07	MPV17L2	0.537086	0.000204356
	NLGN4Y	0.361133	0.00205365	SLC27A5	0.536776	0.000154726
	ESPNL	0.359009	0.0099461	THEM4	0.535717	0.000823579
	APOD	0.35889	0.00472921	SCN3B	0.535183	0.000518932
	TLR1	0.358621	1.7206e-10	CADPS	0.534068	0.00143907
	SLC30A2	0.358615	5.94843e-07	RNF41	0.533273	3.64189e-06
	PFKL	0.358369	0.000307097	C3orf18	0.532717	0.000156103
	F13A1	0.358057	4.79468e-05	IKBKE	0.532546	0.00391736
	SLC2A4	0.356598	0.000632765	INTS4P2	0.532491	5.41855e-06
	TMEM176A	0.356369	1.14512e-07	XAGE1A	0.532196	0.00934816
	LUM	0.355829	4.4016e-07	MMACHC	0.531671	0.000221129
	JAK3	0.355626	6.34473e-06	SMDT1	0.531436	1.80179e-06
	NFE2	0.354267	5.0404e-05	ZNF143	0.530701	6.68844e-12
	PCSK1N	0.354147	0.000731937	FAM20C	0.530564	3.36404e-07
	RNASE6	0.353901	7.02828e-07	GZMM	0.529729	0.00346354
	CLEC7A	0.353579	1.09367e-05	CINP	0.529401	0.000340509
	CIART	0.353556	0.00512869	BCAT1	0.529212	0.00377412
	SH3PXD2B	0.352621	3.54181e-06	ASB13	0.52914	8.41536e-07
	PZP	0.352418	0.000563831	CPNE5	0.528946	2.59814e-05
	CPXM2	0.35204	0.00145824	MPP6	0.528729	0.000454199
	2024-03-01	0.351593	7.30627e-07	TXNDC5	0.528312	0.00650167
	BASP1	0.351452	1.97298e-05	ATP6V1E2	0.527963	1.45185e-06
	LIPA	0.351316	3.71716e-05	STIMATE	0.527811	0.000580343
	SPINK2	0.351236	0.000575577	ZIK1	0.527699	6.15671e-06
	ADH4	0.351207	0.000271154	HOXB4	0.526237	2.97632e-05
	ADRA2A	0.351134	7.20271e-05	CLSTN3	0.52599	0.00041638
	OVOL1	0.350927	0.00910129	AMDHD1	0.525866	0.00328467
	ENSG00000254979	0.350819	0.000324541	TMC8	0.525537	8.92228e-06
	SPTA1	0.350591	0.0089441	ARHGAP22	0.525342	0.00140128
	TPSD1	0.350541	0.000525353	IL16	0.525072	5.8956e-05
	SIRPG	0.350228	1.12354e-06	MPHOSPH9	0.524933	2.58023e-06
	SNAI3	0.349802	1.6136e-06	KLHL21	0.523943	0.000298488
	GAPT	0.348489	3.45214e-05	STAG3L4	0.523849	0.000887486
	SFRP1	0.346823	0.00580295	SPTLC3	0.523708	0.00202099
	FAP	0.346392	0.000298577	ZFP37	0.523539	4.85083e-05
	AP3B2	0.346326	0.000647456	TARSL2	0.522356	6.31106e-06
	PLTP	0.345809	3.90241e-06	CA11	0.522339	0.000465585
	PRSS3	0.345105	0.000771962	SERPINB9P1	0.522077	0.00221498
	RHEX	0.344636	0.000103494	DNAJC3	0.520991	0.000555137
	RASGRF2	0.344047	2.11383e-05	RPL29	0.520285	0.00365701
	ALDH1A3	0.343912	0.00422527	PTGDS	0.520165	1.15484e-05
	LINC00926	0.343243	5.77535e-05	POP1	0.520082	0.000149013
	SRARP	0.34306	0.00403613	TAS2R10	0.52001	8.39128e-05
	IL4	0.342816	0.00594261	CARNS1	0.518872	0.0046879
	RHOH	0.342743	5.03862e-05	ALOX15B	0.517785	0.0137246
	NMUR2	0.342521	8.85882e-05	CD79B	0.516849	0.00402771
	MFAP2	0.342206	6.04186e-05	ACE2	0.515479	0.00044528
	NABP1	0.342136	4.3697e-05	CAMK2A	0.515208	0.000872112
	C7	0.340231	0.000408385	CRIPAK	0.514898	0.0028075
	AQP9	0.339459	0.00124103	ANKHD1-EIF4EBP3	0.514565	4.37775e-05
	SNRPC	0.339219	0.00755573	ZNF215	0.514447	0.0115273
	DUSP5	0.339058	0.0105278	NEK6	0.514034	5.35349e-06
	SEMA6B	0.338912	0.000233321	CYB561A3	0.513896	3.14845e-06
	BLID	0.338102	0.0010571	HPS3	0.513793	0.000361441
	CLDN14	0.337909	0.00748043	CD320	0.513352	0.000123422
	SLAMF1	0.337369	3.00276e-05	ALDH1A2	0.513137	0.00474524
	EGR2	0.336441	0.0070316	MRAP	0.512531	1.01633e-05
	CCN4	0.336173	0.00197649	PUS7L	0.51247	0.000130772
	RGL4	0.335485	0.000255481	MAP10	0.512455	0.000303365
	FCMR	0.33513	6.91346e-07	LIPA	0.512432	0.00043345
	CDKN2A	0.334165	2.24586e-06	GFRA1	0.512122	0.000101373
	TRPC4	0.333656	0.00170065	CSMD2	0.511559	0.00277956
	FABP3	0.333364	0.00503451	GAB3	0.511507	0.000832954
	KLHDC7B	0.333326	0.000617186	CLDN10	0.510832	0.00152087
	SEMA7A	0.333208	6.45313e-05	EPG5	0.51061	4.72997e-07
	EYA2	0.332797	0.00630827	KMO	0.509751	0.000801099
	CMTM2	0.331772	0.010007	SLC22A18AS	0.508936	0.00457334
	STARD5	0.331752	1.21083e-08	EMC8	0.508551	1.12672e-06
	TYMSOS	0.331432	0.00411622	S100A1	0.507938	0.000391119
	CCL22	0.33099	0.000209722	REM2	0.507644	0.00115256
	LILRB5	0.329986	0.000310292	AQP11	0.507436	0.000118357
	CPA3	0.329777	0.00037491	CLEC5A	0.507218	0.0119963
	NLGN1	0.329405	0.00309013	FOLR2	0.507058	0.00963524
	MMP17	0.329011	0.00257613	GREB1	0.506713	0.000426714
	AEN	0.329008	7.04817e-06	LOXL3	0.506441	0.000377451
	KMO	0.328836	0.000124212	IGLL1	0.505933	0.000606836
	MMP25	0.328056	0.00369356	UBE2L3	0.505209	5.28445e-06
	UBE2QL1	0.327996	0.00132822	PODN	0.504867	0.000476508
	FOLR2	0.327356	5.53427e-05	CD96	0.504695	0.00094648
	CD200R1	0.327174	0.00059926	QRSL1	0.504628	0.000331352
	HRC	0.327036	2.38495e-07	GATA3	0.503738	0.00260512
	OSR2	0.326779	0.00481868	ADRA1B	0.502909	0.00970605
	RGS17	0.326622	0.0042329	PUSL1	0.502793	0.000118891
	BPIFB2	0.326311	1.64157e-05	ARFGEF2	0.502761	0.00137742
	MPEG1	0.326197	3.16625e-08	KDM4C	0.50182	3.54322e-05
	KRT222	0.326183	0.000797271	USP30	0.501683	0.000595885
	RAB42	0.325129	0.00205778	STX17	0.500773	1.27474e-06
	CABYR	0.32505	0.00755467	FAM133B	-0.500474	2.80741e-05
	TREML2	0.32488	0.0013179	HNRNPC	-0.500491	0.000367193
	E2F3	0.324613	4.53954e-10	LINC01205	-0.501353	0.00221605
	FFAR2	0.324361	0.00121341	HNRNPDL	-0.501527	5.09186e-08
	RUNX2	0.324333	8.77937e-07	ZNF610	-0.501569	0.0133195
	NIBAN3	0.324064	0.000597177	SLC39A10	-0.501609	0.00334409
	OR52K2	0.323749	1.76135e-06	RAD21	-0.501726	0.00168128
	MCTP1	0.323665	0.00253244	RELL1	-0.501976	0.000240364
	CYTOR	0.323165	1.52688e-05	CLOCK	-0.502416	0.000285582
	STAG3	0.322753	5.84596e-05	MIR330	-0.502622	7.44343e-06
	VIPR2	0.32227	0.000837003	PAK1IP1	-0.503184	0.00119369
	CFI	0.321917	1.50053e-06	ATXN1	-0.503229	0.00018254
	TAGAP	0.321081	0.00147477	ST8SIA1	-0.503424	0.00171972
	BCAT1	0.320948	0.000125017	SMURF2	-0.503621	0.000116283
	SOD2	0.32069	0.00254035	TMEM74B	-0.503692	0.00152683
	ACKR1	0.320078	0.0104213	CD47	-0.504274	0.0004801
	TENM3	0.319739	0.00017343	EGFL6	-0.504882	0.000364649
	ANGPT2	0.319542	0.00307777	CAAP1	-0.505146	0.00142561
	MTHFD1L	0.319489	9.6148e-07	H2AFJ	-0.505328	0.000782407
	OR10H2	0.31942	6.76926e-05	GCLC	-0.505418	0.00174238
	HLA-DOB	0.319086	6.52667e-05	FRK	-0.505424	0.0122103
	LRRC38	0.318362	0.00093538	TPPP3	-0.505431	8.24365e-05
	FAM131C	0.318273	0.000262572	POTEE	-0.506116	2.42857e-06
	DCLK1	0.317841	0.00120952	MTTP	-0.506235	0.000725619
	SLC16A7	0.317082	2.8353e-05	RPL4P2	-0.506905	0.00114774
	M1AP	0.316926	0.00106551	NUCB2	-0.5071	0.00105941
	TMEM158	0.316867	0.00163447	AZIN1	-0.507265	0.00604542
	CHI3L2	0.316069	0.00914091	MARVELD2	-0.507317	0.00103158
	BLOC1S5-TXNDC5	0.315513	1.97701e-06	DLG1	-0.507449	0.00300366
	MRO	0.315397	0.00378828	SCRN3	-0.507532	0.000775181
	CLEC4A	0.315316	1.96643e-09	DYNLT3	-0.508202	2.97278e-05
	HDAC9	0.315146	0.000491685	RRN3	-0.508499	0.000626157
	CYP19A1	0.314914	9.00161e-05	RPSAP2	-0.508627	3.37151e-08
	ICAM3	0.314173	5.49537e-07	PSIP1	-0.508716	9.62413e-06
	COLEC11	0.31383	0.00453025	IDI1	-0.508967	0.0037305
	GLT1D1	0.313169	0.00208039	SLC25A33	-0.508981	5.39491e-07
	P2RY10	0.31179	0.00471856	RBBP6	-0.509865	3.19432e-05
	RNF175	0.311504	0.00334278	MIR22HG	-0.510785	0.000988674
	MPO	0.310429	0.00571154	ZNF124	-0.511425	0.00054999
	SPON1	0.310152	2.27126e-07	NEDD9	-0.511738	0.00126576
	ACSL6	0.309922	1.67295e-05	FANCI	-0.512648	0.00648446
	ITGBL1	0.30951	0.00220138	UQCRHL	-0.512875	9.43908e-05
	VMO1	0.309463	0.000104995	MCHR2	-0.514978	0.000843971
	FUT8-AS1	0.30888	6.76802e-05	LOC643387	-0.515034	8.31239e-06
	SPNS3	0.308409	2.16676e-07	FTH1P8	-0.515054	0.000139264
	C3	0.30826	3.19669e-07	SAR1A	-0.515582	0.00120324
	ABCA4	0.307967	0.000160307	TEDC1	-0.516668	0.00218429
	GPR34	0.306904	1.87129e-05	KIF27	-0.517228	1.5397e-05
	ZBP1	0.306558	0.000219422	ISCA1P1	-0.517284	3.80943e-05
	C1R	0.305834	4.05119e-08	LIG4	-0.517291	6.24196e-06
	TLR6	0.304003	3.59864e-05	CCNH	-0.517413	0.000700502
	GZMK	0.303339	0.00314354	SELENOP	-0.51759	0.00575094
	KCND3	0.303257	8.38232e-09	NOP56	-0.518378	3.80819e-05
	MNX1-AS1	0.303182	0.011103	INTS13	-0.51876	0.000413543
	MEI1	0.301653	6.84676e-05	EDEM3	-0.51926	2.42718e-06
	RELT	0.301532	3.87139e-08	ZNF675	-0.519476	1.08226e-05
	TRPM2	0.301141	0.000140887	HNRNPA1P2	-0.519651	0.00238291
	SYNGR4	0.301132	0.00501902	ZNF611	-0.519816	0.00457188
	TMEM38B	0.299965	1.5356e-06	HIVEP2	-0.52002	6.7892e-05
	SIT1	0.299621	0.00431746	TLR3	-0.520114	0.00536522
	RAB33A	0.299492	2.04962e-06	PTGS2	-0.520566	0.0139574
	CKLF	0.299482	7.40136e-05	SPINT3	-0.520776	0.0123129
	VWA1	0.2993	0.0065542	HSPD1P4	-0.521192	0.00027364
	FLT3	0.299049	0.000986774	CFH	-0.521409	0.000647381
	MS4A6E	0.29901	0.0122303	ZNF551	-0.521479	0.0010532
	LOX	0.298682	0.000316439	LOC652608	-0.52164	0.00674815
	ADGRE2	0.298418	7.33126e-05	HNRNPA1P39	-0.52327	0.000351831
	CD8A	0.298363	0.000288277	CLDN3	-0.523571	0.00673581
	RGMA	0.29732	0.00159029	MATN2	-0.523615	0.00539879
	BEND6	0.297039	0.00109771	BUB3	-0.523944	9.3195e-06
	IL23A	0.296587	8.7228e-07	PCDH20	-0.524068	0.00407278
	CAMK1G	0.295886	0.0054634	RPL21P45	-0.524158	0.00182139
	DCX	0.295754	0.00103547	RAMP2-AS1	-0.524242	4.96151e-06
	DEPTOR	0.295353	0.000155679	CCNG1	-0.524952	2.89627e-05
	PLAUR	0.294564	0.00161105	NRCAM	-0.525085	0.00583642
	IRX6	0.294197	0.00559988	HERC4	-0.526026	0.000288197
	CD72	0.293975	0.00177756	TIA1	-0.527459	5.28557e-06
	CLEC10A	0.293962	0.000522871	IRF4	-0.528091	0.00650755
	KRTAP1-5	0.292322	0.00181017	LINC01567	-0.528447	0.0122952
	SSR4	0.291454	9.02238e-09	TMEM47	-0.52854	0.000945606
	LRRN2	0.291181	5.32891e-05	SNORD36C	-0.530775	0.00453097
	CORIN	0.291125	0.00139154	TRAM1L1	-0.531969	0.00159582
	CRTAM	0.291054	0.000351647	CKAP2	-0.53274	0.00283525
	PGPEP1	0.290849	0.000125479	PACRGL	-0.533376	0.00617407
	TNF	0.29044	0.0038489	DPP6	-0.533406	0.00325084
	RCN3	0.290337	2.37741e-05	ACAD8	-0.533804	0.000102637
	ANK1	0.290022	0.000195297	FAM8A1	-0.533813	0.000272711
	ARHGAP15	0.289607	1.19797e-07	AMY1A	-0.534024	5.25893e-07
	SLCO5A1	0.289531	0.00077927	RPS3AP49	-0.534203	0.0137751
	PLPPR4	0.289109	0.00271554	RECQL	-0.534259	4.07987e-05
	LCE1C	0.289107	0.000441834	OSTCP1	-0.534728	3.41725e-07
	CSDC2	0.288578	2.79218e-05	TPP2	-0.53527	0.00179501
	LRFN5	0.288156	0.00179804	NDUFS2	-0.535361	0.000482818
	SYNGR1	0.288031	2.0155e-08	DUSP6	-0.535475	0.000136093
	ENSG00000271434	0.287713	0.00174751	ATRX	-0.535682	0.00130534
	CPA4	0.287448	0.00866454	ZNF75A	-0.535886	0.00118826
	SIGLEC7	0.287321	0.000295835	PRKRA	-0.536749	7.06951e-05
	SPSB4	0.287258	0.000774697	SLC16A14	-0.536758	0.00539552
	C1S	0.287195	2.03023e-08	NTNG1	-0.53766	0.00537931
	SLC45A3	0.287109	4.71246e-05	KCTD7	-0.538105	0.00229258
	IKBKE	0.286981	2.81618e-05	UNC93B2	-0.538199	0.00517196
	KBTBD8	0.286845	0.00011205	SUMO2	-0.538901	0.000241318
	NTRK1	0.286734	0.000700045	YY1	-0.539304	0.000333427
	HSD17B14	0.286557	6.18082e-07	TIMM8B	-0.539487	8.50332e-05
	SLC18B1	0.28655	8.73056e-07	LCAT	-0.539695	0.00623021
	DUSP26	0.286157	0.00680982	RPL26P12	-0.540487	3.17169e-05
	TMEM176B	0.285775	5.44515e-05	ARL5B	-0.541138	0.00439905
	P2RY8	0.28549	0.000438245	ARF6	-0.541239	1.10636e-05
	DIO3	0.285289	0.00581364	NPNT	-0.541336	3.22986e-05
	ZP3	0.284595	0.00144436	HNRNPH1	-0.541745	4.80675e-05
	BCL11A	0.284123	0.000148822	RNPC3	-0.541913	0.00275886
	LY9	0.284009	0.000294573	PIK3C3	-0.542004	0.0017105
	PVALB	0.283433	0.00471021	CNGB1	-0.542129	0.0012975
	SLAMF8	0.282686	0.00340236	MSANTD2	-0.542515	0.00074588
	JPH3	0.282438	8.21078e-06	MUC21	-0.543189	0.00174952
	RIPOR2	0.282437	0.00145586	SUMO1P3	-0.543602	1.46226e-06
	BHMT2	0.281679	0.000118369	NPM1P28	-0.54391	5.34317e-05
	FBXO41	0.281637	3.23198e-08	FAM86DP	-0.543964	0.00165103
	SLC8A3	0.280941	0.000388199	EMB	-0.544299	0.000212601
	CADPS	0.280791	0.0015233	AMY1C	-0.544976	1.18309e-05
	TNFSF14	0.280752	0.00781023	SNORD49A	-0.546302	8.37741e-05
	SEMA3D	0.28034	0.00063886	DNAJC10	-0.547188	0.000557769
	SIGLEC8	0.280244	0.00240436	RPL21P53	-0.547267	0.0026102
	TTYH1	0.280066	0.00038408	ERP44	-0.548033	0.000104807
	PYCR1	0.280038	0.000348142	TCEA1	-0.5482	0.00342895
	RBP4	0.280016	0.00904601	RABGAP1L	-0.548323	0.00118849
	DGAT2	0.279951	0.00168761	PTX3	-0.548364	0.0107705
	CTSS	0.279691	0.000182189	NOL8	-0.548386	0.00441872
	MELTF	0.27915	0.00423649	API5P1	-0.548391	5.67048e-06
	SIGLEC15	0.278945	0.00141141	UQCRH	-0.548576	4.70911e-05
	ARRDC5	0.278254	5.80201e-05	ANK3	-0.549122	0.000238606
	CHRNA6	0.278202	0.0106605	UBE2H	-0.549679	0.00503634
	PLEK	0.277856	0.000102252	ANKRD30B	-0.550181	8.24788e-05
	MED29	0.277686	0.00269546	LOC645314	-0.550976	4.81268e-05
	LHX2	0.277542	0.00831049	MAGT1	-0.551021	0.000386257
	PLAAT1	0.276933	0.00324042	ALDH5A1	-0.551045	0.00450822
	NKAIN4	0.276887	0.000706855	MRPL3	-0.551124	0.000329588
	CDH22	0.276604	0.000217317	ADGRF5P2	-0.552035	0.000126176
	MS4A4A	0.276185	7.02391e-05	IL1RAP	-0.552157	0.00128678
	IGFLR1	0.275933	0.000716373	FAM122A	-0.552246	0.00176858
	KYNU	0.275217	0.00134123	SNORA29	-0.552902	0.000327482
	KCNS2	0.274975	0.00271858	MPHOSPH10	-0.553188	7.0682e-06
	FCGR2A	0.274041	4.19113e-07	HLA-DQA2	-0.553235	0.000109625
	PTPN7	0.27384	0.000137841	DYNAP	-0.553762	0.000914667
	CEACAM20	0.273496	2.29284e-05	GLTPP1	-0.555522	3.05333e-08
	KCND1	0.273347	0.0011846	CA13	-0.555734	0.00120064
	PLAAT5	0.272389	0.000312257	KLHL2	-0.55575	0.00397268
	RDH10	0.271687	0.00359233	UGP2	-0.55599	3.16086e-07
	OGFRL1	0.271233	3.17835e-08	LARP4	-0.556232	9.18632e-05
	HVCN1	0.27115	1.87178e-05	FAM136BP	-0.556422	3.63315e-05
	CCDC71L	0.270782	0.00306055	F11R	-0.556757	0.00138076
	LRRC25	0.270335	2.13811e-05	FAT3	-0.559175	0.000922969
	FRMD1	0.270197	0.00160335	CAP1P1	-0.559495	7.74856e-06
	LINC02381	0.269933	8.70525e-05	SRPK2	-0.559608	0.00088396
	RBP7	0.269549	0.00144812	ZFP30	-0.560375	0.0137068
	FBLIM1	0.269521	0.000214916	RPL10AP6	-0.560573	0.000273668
	AEBP1	0.269139	0.000110792	RPL31P4	-0.560858	0.000616524
	ST13	0.26905	0.00213843	YAP1	-0.56232	0.00174308
	MOB1A	0.268947	1.10855e-08	MAOB	-0.563201	0.000519441
	NAV3	0.268515	0.000184489	LOC100128288	-0.5633	0.000139587
	ACTL6B	0.268455	0.00397741	FAM53A	-0.563359	0.000416561
	KCNAB1	0.267981	0.00650722	SENP8	-0.563412	0.000236366
	FAM20C	0.267792	6.50507e-07	CDC5L	-0.563599	0.00120777
	C1orf158	0.267714	0.00433377	LOC400061	-0.564739	9.07844e-05
	DRD5	0.267676	0.00250447	IL1RAPL1	-0.564985	0.00150769
	CHST15	0.267559	1.60259e-09	PHLDB2	-0.56535	0.00721959
	ZNF469	0.267486	0.000447534	CHML	-0.565377	6.7735e-07
	DNAJB9	0.265961	7.72171e-08	RPL39P20	-0.56584	0.00504411
	KDELR2	0.265746	1.51553e-07	UEVLD	-0.565888	0.00264432
	EVI2A	0.26567	8.1403e-05	GABARAPL2	-0.56629	1.68048e-05
	RHBDL1	0.265575	0.00236837	RPL18AP11	-0.566402	6.63825e-05
	FCER1A	0.264563	0.00826468	RPS10P11	-0.566581	0.000587987
	QPRT	0.264461	6.42119e-06	ATP11B	-0.5666	0.00179196
	CDA	0.263859	0.000477206	UQCRBP1	-0.566886	6.53819e-05
	FTL	0.263106	3.08827e-06	SLC5A8	-0.567332	0.00163571
	GFRA3	0.263072	0.00169044	LOC653080	-0.567486	0.000968832
	PHF21B	0.262998	0.0086537	LMOD3	-0.567746	0.000456091
	SULF2	0.262765	0.000236701	POM121L8P	-0.568338	0.000904499
	PAX4	0.262536	0.000198818	YTHDC1	-0.568426	0.000171023
	R3HDML	0.261875	0.00365444	GOLGA8DP	-0.568837	0.000324333
	DBP	0.261698	0.00883865	VAPA	-0.569025	0.00367404
	ROR2	0.261693	0.0050724	PTP4A1	-0.569123	0.000491863
	TTC39C	0.260917	2.71538e-08	MFSD11	-0.569725	1.38478e-05
	MSI2	0.260725	0.000119727	ETS1	-0.56993	9.21121e-05
	LMAN1	0.260232	7.0879e-05	SCN4B	-0.570354	0.000324675
	CENPW	0.259209	6.64602e-06	ARFGEF3	-0.572324	0.00247718
	ITGAX	0.259191	0.000626101	KCTD12	-0.573438	0.0078357
	TSHZ2	0.25912	0.00113164	KAT2B	-0.57349	0.000288425
	GPR32	0.259061	0.00100085	DHFR	-0.573929	0.0006413
	MAP3K7CL	0.258628	8.86003e-05	FBXL3	-0.574336	0.00405898
	GPR132	0.258357	0.00132519	ZNF302	-0.574387	0.000106255
	S100B	0.258001	0.0098659	TATDN1	-0.575263	0.00263311
	GSTM4	0.257829	0.00370177	CERNA2	-0.575308	0.00063484
	SPCS3	0.257794	6.30163e-07	RABGEF1	-0.576043	0.000882738
	AMPD2	0.256763	1.11184e-07	AARD	-0.576901	0.00167067
	TRAF3IP3	0.255938	0.000182946	SINHCAF	-0.578461	0.00178897
	DLG2	0.255753	0.00868292	GSTTP2	-0.578568	7.02213e-07
	SNAI2	0.255546	0.000174501	GPD2	-0.578909	0.000283153
	CD37	0.254777	4.07757e-06	YWHAG	-0.579023	0.00208418
	CYBB	0.254608	0.000267254	ZSCAN12P1	-0.57966	0.000277776
	ASPHD2	0.254009	0.000431234	YIPF5	-0.580264	0.00150865
	GPAM	0.253646	0.000983395	NINL	-0.580609	0.0047381
	SRM	0.253547	2.5001e-07	HCG18	-0.581082	0.00174974
	EMX1	0.253252	7.42715e-07	PTPN2	-0.581152	0.000252597
	LINC00643	0.252924	0.00338818	LOC729200	-0.581632	6.38374e-05
	NRXN2	0.25292	0.00671311	ZC3H7A	-0.581817	0.000383034
	CLIP3	0.252757	1.04058e-05	EPCAM	-0.583	0.00152462
	LGALS12	0.252522	0.00333859	ADAMTS7P1	-0.583109	0.000163143
	NACA4P	0.252089	1.83901e-05	RPL7L1P9	-0.583646	0.00114066
	CDKN2A-DT	0.252037	0.0054719	SLC30A5	-0.584054	7.31504e-05
	RRAGD	0.251973	3.21863e-05	THUMPD1	-0.584323	0.000660104
	FAM126A	0.251813	0.00106735	MET	-0.585677	0.000135682
	LY86	0.251631	9.1219e-05	ZNF711	-0.587569	0.000281454
	SLC25A45	0.251591	4.59934e-07	EIF2AK4	-0.588112	0.0002542
	CDC42	0.251425	0.00119826	IBTK	-0.588312	0.000307753
	MIR7-3HG	0.251319	0.00480024	SMNDC1	-0.588539	0.000351607
	WNT10B	0.251082	0.000485408	ABAT	-0.588725	0.00127784
	MNDA	0.250666	0.000828563	HEXD	-0.588759	0.000948045
	ASIC1	0.250579	0.00542384	TBC1D9	-0.589919	0.00027575
	TCERG1L	0.250502	0.00768021	CLIC4	-0.590145	0.00195456
	VCAN	0.25043	0.00723645	RPSAP47	-0.590245	0.00106311
	RALGPS2	0.250324	0.0121794	PSMC1P12	-0.591787	2.2964e-06
	ELOVL4	0.250011	0.0013805	RPL7AP53	-0.591806	0.00285845
	UPP1	0.249796	0.00229977	ACSL1	-0.59189	0.00749569
	CORO1A	0.248768	0.000363409	MSL2	-0.592385	6.08051e-05
	HCAR3	0.248599	0.00537938	RBBP4	-0.594448	3.55598e-06
	RHCE	0.248375	0.00857061	ZNF716	-0.59496	0.00126988
	EVX1	0.248171	0.00482992	ABHD13	-0.595089	4.7993e-07
	SMCHD1	0.248099	0.00140155	VEZT	-0.595108	1.83334e-12
	PIK3R6	0.247778	0.000117638	EXOG	-0.595511	0.000229378
	ITGB2	0.247313	8.44302e-05	SPATA13	-0.595515	0.00105904
	SESN2	0.246929	6.21265e-07	BDH2	-0.595578	0.0135384
	LINC00525	0.24675	0.00567945	LOC642975	-0.595721	5.7299e-05
	FUT7	0.246303	0.000741911	AKNAD1	-0.595753	0.000228042
	PARVG	0.246117	3.53571e-06	FDPS	-0.596732	7.23177e-07
	PTGIS	0.245976	0.00343078	ANKRD36C	-0.597743	0.00260916
	MS4A6A	0.245235	0.000746162	BLNK	-0.597831	2.29224e-06
	TMEM86A	0.245148	0.000654308	RPL15P17	-0.598527	0.000159106
	PRDX4	0.245137	2.12876e-07	CCZ1B	-0.598728	0.0134934
	DEF6	0.245047	3.3049e-07	SEMA5A	-0.598731	0.000335048
	SLC1A4	0.244768	0.000243982	H3F3AP6	-0.600167	8.39722e-06
	SLC38A10	0.244273	4.58905e-05	RPSAP55	-0.600248	3.81394e-09
	CDKN3	0.244269	0.00415205	MORC4	-0.600757	0.000999144
	TTYH3	0.244052	7.38432e-05	AKAP12	-0.600987	0.00215319
	UBASH3A	0.24404	0.0075515	CASP6	-0.601181	0.00109507
	PTPN22	0.24351	0.00122736	H3F3AP4	-0.601868	2.68267e-05
	CCR1	0.243477	0.00267374	HMSD	-0.601887	0.00548193
	RAC2	0.243468	1.8271e-05	RPL18AP15	-0.602342	0.000175153
	CD53	0.243438	1.03403e-05	RPEL1	-0.602389	3.40186e-07
	ALG1	0.243279	0.00135095	KRT18P13	-0.602581	3.33488e-10
	GPR65	0.243164	7.43406e-05	RPL15P20	-0.602934	0.00252141
	LILRA2	0.24306	0.00183214	CHRM3	-0.60327	0.00221347
	HGD	0.242671	0.00568923	RSRP1	-0.603545	6.64775e-05
	MEX3D	0.242607	3.62572e-06	FAM72D	-0.60363	3.32393e-05
	MMP23B	0.242486	0.000229917	F3	-0.603848	0.00241343
	AOAH	0.242309	0.000232586	MBLAC2	-0.603969	0.00883222
	TBXAS1	0.24174	6.65511e-06	VPS37A	-0.604718	0.000768602
	ABCG4	0.241692	0.0117051	LIMS1	-0.604877	3.06258e-08
	CNR1	0.241669	0.0066112	BMS1P20	-0.605933	0.00410127
	ACE2	0.241552	0.00802493	ZNF430	-0.606028	3.89915e-05
	OXT	0.24139	0.000749321	STX7	-0.606632	3.18358e-06
	GPC6	0.241127	0.00456924	BAGE3	-0.608321	0.00506745
	BLM	0.241061	0.000104632	UCA1	-0.608604	0.000192891
	CHST13	0.240278	9.88334e-07	SNX24	-0.608682	0.00360163
	SMOC1	0.24013	0.00101364	SFPQ	-0.609191	3.25191e-05
	CD163L1	0.240013	0.00656724	SNAP23	-0.609564	0.00032299
	RPS2P32	0.23973	4.2963e-09	CREBL2	-0.609572	0.000477421
	CDYL2	0.239002	0.000502749	ARMT1	-0.609711	0.00136222
	DIRC1	0.238313	0.00493633	LINC00472	-0.610961	0.000128131
	VAV1	0.237759	9.97123e-07	POLK	-0.611138	3.75886e-06
	GMPPB	0.237686	9.96481e-06	AGTPBP1	-0.611168	0.000594622
	MAN2B1	0.237349	8.72053e-06	GNG10	-0.611294	0.000859288
	HMOX1	0.237217	0.00492272	NAA25	-0.612036	5.21922e-06
	RGS18	0.236857	0.00321134	MAK	-0.613395	0.00616728
	CHST11	0.236039	5.87173e-05	HNRNPA1P53	-0.614126	0.000318785
	COL8A2	0.235432	0.000515066	TERF1P4	-0.616114	7.77704e-05
	KCTD4	0.235319	0.00553046	ESCO1	-0.616388	0.00209569
	LIPC	0.23525	0.00635362	ABCA10	-0.618071	0.000292621
	EVI2B	0.23513	0.000101324	ZNF638	-0.618428	9.7014e-05
	SASH3	0.235029	2.53773e-05	NDUFAF4	-0.619283	0.000332152
	ACSL4	0.234734	0.000860254	POT1	-0.619383	0.000349368
	C16orf74	0.234606	0.000360082	RABL2A	-0.619712	3.28993e-05
	XRCC6P5	0.234393	0.00171421	VPS50	-0.619814	0.00244594
	SMYD3	0.234062	1.73372e-09	FTH1P16	-0.619969	0.000314536
	PTGS1	0.233686	4.97496e-06	HMGB3P24	-0.62021	0.00703947
	FAM49B	0.232966	5.87508e-08	FLRT3	-0.620381	4.65035e-08
	NFKBIE	0.232897	0.000407943	LINC00957	-0.620561	2.79216e-05
	CD164	0.232845	4.42593e-07	PHF3	-0.620849	0.000807552
	AIRE	0.232715	0.000102476	ATP2B1	-0.620944	0.000113046
	BMF	0.232197	0.000394529	RPSAP19	-0.62191	0.000195537
	EIF4EBP1	0.230794	1.97532e-06	RPLP0P10	-0.622553	0.000989129
	SMAP2	0.230373	0.000382592	TSEN15	-0.622796	0.000396698
	SERPINA6	0.23009	0.0100251	GIPC2	-0.624114	0.000117974
	LRRC39	0.229098	0.00496151	MMP19	-0.624474	0.00909485
	FBLN1	0.229025	0.00296546	LOC653513	-0.625437	0.00323868
	NFKBID	0.228745	0.0102767	PCDHB15	-0.626244	4.57253e-07
	STAB1	0.228535	0.000185435	AMD1P3	-0.626545	0.0001375
	MMD	0.228478	1.51517e-07	MYO3B	-0.627544	0.000315737
	SEPTIN1	0.228275	0.00521105	CAT	-0.628446	5.3482e-05
	MILR1	0.228236	0.000842808	TMEM107	-0.628498	0.00526822
	NCF2	0.228166	0.000368759	MAP7D3	-0.62963	0.000239603
	ITIH1	0.227437	0.00447201	KLHL7	-0.629765	8.08899e-05
	CYTH4	0.227334	0.00129175	TLL1	-0.630208	0.00459262
	LINC00626	0.227236	0.000225062	EHD2	-0.630258	1.65217e-05
	UCK2	0.22713	0.00166886	VSIG1	-0.632622	0.00160906
	SNX8	0.226988	3.60412e-05	TAB2	-0.632804	3.54395e-05
	SMPDL3A	0.22687	7.60418e-05	CEP57L1	-0.633292	1.4644e-05
	KRT40	0.226742	0.0103829	BTF3L4P2	-0.633844	4.61258e-07
	FAM178B	0.226266	4.21696e-05	RHOB	-0.63465	0.000303556
	SAMD4A	0.22601	0.00470768	SP3	-0.635268	0.000223256
	GCA	0.225314	0.000194441	LRRC59	-0.636006	0.000147326
	PRR13	0.224532	0.000135074	RPS12P29	-0.636083	0.000196653
	AIFM3	0.224457	0.000134492	RPL7AP34	-0.636517	0.000653626
	MAN2A1	0.223935	4.72676e-06	TPI1P2	-0.636795	1.16514e-07
	PLB1	0.223836	0.000102622	METTL2B	-0.637809	1.35882e-06
	SMOX	0.223729	0.00118374	ELOVL5	-0.637875	0.00142933
	SYNGR3	0.223696	0.000887762	KIAA1586	-0.638121	0.000713787
	KCNAB2	0.223635	1.38289e-05	UBA2	-0.638308	0.00644443
	HIST1H3J	0.223452	0.00257898	FNDC3A	-0.63843	0.000490059
	LPCAT2	0.223093	0.00504596	USP8	-0.639218	0.000671844
	AMPD3	0.222998	0.00012587	DCTN4	-0.639614	0.000141342
	DUSP8	0.222947	0.00868301	BNIP3L	-0.639989	0.000707601
	ITGA7	0.222918	0.0093791	HSPA13	-0.641682	0.000175458
	GAS7	0.222458	1.24417e-05	MRPL48	-0.64182	3.89613e-05
	TUBB4A	0.22206	0.000617759	LOC100130701	-0.641996	0.000831754
	CHRNB3	0.221525	0.000270597	LAPTM4A	-0.642314	1.24108e-05
	ZMAT3	0.221456	0.000394843	MICU3	-0.64277	2.4157e-05
	LFNG	0.22139	0.00165186	FAM98A	-0.643265	0.000527872
	SLC2A1	0.221182	0.00776511	UHRF1BP1	-0.643767	0.00193305
	TGFB3	0.22098	0.00801985	FAM174A	-0.645149	0.00667648
	CYTIP	0.220595	0.00355375	HEATR5A	-0.645257	1.09241e-06
	FXYD5	0.220148	5.47569e-07	EIF4A1P7	-0.646988	9.95065e-06
	CD96	0.219893	0.00381998	SNX7	-0.647156	0.000162044
	RBP5	0.219788	0.00450995	ANKRD27	-0.647735	0.000349324
	FGF7	0.219377	0.00682623	HSPE1	-0.648026	0.000415882
	CRYBB1	0.219253	0.00802343	RPS17P16	-0.648051	0.000308629
	GPX8	0.219076	0.00831847	PPP1R9A	-0.648237	0.00172538
	PDGFRA	0.218871	0.00107985	FCGR3A	-0.648271	2.34069e-10
	PDGFC	0.218214	2.38452e-07	CTSLP4	-0.648808	2.94381e-06
	P2RX1	0.21797	0.000116209	NME7	-0.648994	0.000672813
	COL27A1	0.217715	0.000751858	CHD1	-0.649206	5.94133e-05
	LCE1A	0.217568	0.000226892	SERPINI1	-0.650322	0.000293606
	OR2H1	0.217351	6.72223e-05	ALPP	-0.652358	5.90396e-05
	PLAT	0.217298	0.00561545	PIGX	-0.652486	3.80271e-05
	SUGCT	0.217192	0.000260354	SMPDL3A	-0.652605	0.00279128
	DAPP1	0.217181	0.00213185	CHEK2P1	-0.653014	0.00025237
	ACTN3	0.217075	1.70148e-05	TTC33	-0.653088	0.0111453
	WFDC3	0.216843	1.16811e-05	RPL12P6	-0.653125	0.00252442
	ARHGAP22	0.216757	0.00126426	SLC5A1	-0.655095	0.0006798
	ARHGAP9	0.216535	5.56569e-05	LEP	-0.655278	8.89617e-06
	GBGT1	0.216491	1.97928e-05	SLC25A5P8	-0.655889	0.000198412
	MYBPC3	0.216029	0.00107988	RPL21P18	-0.655967	0.00144518
	KLHL6	0.216014	0.0111915	TMEM128	-0.656394	0.00199533
	EFHD1	0.215959	0.0084122	ZC3H6	-0.656769	0.000545885
	CHEK2	0.215881	2.22147e-08	SENP6	-0.656795	1.54762e-05
	PRXL2A	0.215853	8.83886e-06	NXNL1	-0.657181	3.85987e-05
	OR11A1	0.215847	0.00040802	HCCS	-0.657257	3.35617e-06
	RASD2	0.215607	0.0107377	DENND6A	-0.65784	0.00013765
	PRKACB	0.21538	0.00401993	LINC00092	-0.658133	2.71674e-07
	MANEA	0.215345	0.00360018	UBE4A	-0.65867	0.000274908
	SRGN	0.215148	0.000945631	SCARA3	-0.658924	0.00030625
	KRTAP2-4	0.214957	9.7919e-05	LOC388955	-0.659192	9.63513e-08
	TLR8	0.214914	0.00677675	EIF3A	-0.659255	0.000243287
	GRM7	0.214763	0.0122001	ZNF486	-0.659812	8.14478e-06
	PPP1R18	0.214669	4.81709e-07	CNEP1R1	-0.660155	2.6565e-05
	ALOX5AP	0.214661	0.00446548	RPS23P8	-0.661081	0.000272042
	KRTAP1-3	0.214056	0.000718236	MTMR6	-0.661276	0.000319935
	SLC41A2	0.213721	0.00394591	HMGB1P10	-0.661327	7.42721e-07
	IL37	0.213159	0.00349261	SOSTDC1	-0.661409	0.00729475
	IFITM1	0.21279	8.17107e-05	CENPW	-0.662122	0.00929892
	BID	0.212415	1.25015e-06	TAPT1	-0.66252	1.56331e-06
	LILRA4	0.212267	0.00472472	B4GALT6	-0.665264	2.6983e-06
	MAGEB2	0.212232	0.000623532	PCDHB9	-0.665945	1.20236e-06
	SLC7A1	0.212218	0.00469277	SMC3	-0.666075	0.000874673
	TRIM27	0.212196	1.18179e-05	PLCL1	-0.666177	0.00107112
	CD4	0.212045	2.72402e-05	NUP54	-0.666409	0.000141059
	KCNK15	0.211699	2.43586e-06	HNRNPCP3	-0.6665	1.03021e-07
	ANXA9	0.211693	0.00831798	PRKCI	-0.667966	0.00035407
	NGF	0.21149	0.00472026	LRRC40	-0.669608	0.000196411
	MXRA8	0.210588	0.000184358	PRPF18	-0.669877	0.00820047
	MGAT2	0.210444	2.2228e-09	SUCO	-0.670171	9.78143e-08
	ST20-AS1	0.210402	0.00266933	FAHD2A	-0.670179	1.85154e-05
	SLC46A3	0.210293	7.36081e-07	PM20D2	-0.670269	0.00611182
	GRAMD1B	0.210262	0.00474315	DEK	-0.670821	0.000184266
	CCL24	0.210041	1.73219e-05	RPL21P125	-0.671122	8.71641e-05
	ZP2	0.210002	0.00260534	DTL	-0.673123	0.00148842
	LRP1	0.209988	2.65174e-07	ZNF222	-0.673965	7.08292e-07
	SEC24D	0.209897	4.99452e-06	MAPK9	-0.674321	0.000206377
	KDELR3	0.209759	0.00221808	ARHGAP12	-0.675003	0.000172307
	GXYLT2	0.209256	0.00117453	EEF1B2P6	-0.675132	0.000701489
	BST1	0.209133	4.38611e-05	HSD17B7	-0.675469	1.21992e-05
	NMB	0.208932	0.0013281	DENND4A	-0.675476	2.42488e-05
	KIAA1586	0.20866	0.00668161	MINPP1	-0.675599	0.00529644
	SEC22B	0.20865	2.3815e-13	GATA6	-0.676381	0.000298883
	MT3	0.208639	9.26388e-07	RPS27AP11	-0.676402	0.000162062
	RPS10P7	0.208388	1.47488e-06	SOX7	-0.676402	0.0020842
	STK26	0.208357	6.82313e-06	PPP1R12A	-0.676616	0.000927409
	TMEM121B	0.208349	0.0030448	EGLN3	-0.676743	0.00654751
	STEAP3	0.208119	0.00525239	LOC647086	-0.676855	5.75054e-07
	NME1	0.207875	4.96355e-07	NUDCD1	-0.677184	0.000573871
	CD3E	0.207837	0.00183758	S100A3	-0.677533	0.00705324
	TRIM46	0.207682	0.00734929	NUS1	-0.678034	4.40668e-05
	TMEM151A	0.207567	0.000618779	RAB14	-0.67834	0.000233035
	TUBA3D	0.207534	0.00418003	GALNT1	-0.679108	0.00162431
	SLC25A40	0.20718	0.000994344	RPL14	-0.679229	0.00401325
	CTRB2	0.207152	0.00153875	HAUS6	-0.679598	0.000145972
	ITGAM	0.207051	0.00272741	UPK3BL1	-0.680406	2.95272e-05
	TLR2	0.206938	0.000455599	EIF4E	-0.681493	7.11298e-05
	RPS19	0.206752	1.21318e-09	IFT74	-0.683047	0.000159813
	TNFAIP8L2	0.206658	0.000608907	ZBTB44	-0.684878	0.00040375
	KCNK13	0.206299	0.0107892	AS3MT	-0.684952	0.000285447
	KRT85	0.206066	0.0041068	C6orf62	-0.685852	1.39534e-08
	SEL1L	0.206032	0.000412602	MBNL2	-0.686088	2.38647e-05
	CKMT2	0.205966	0.00585334	RPS2P9	-0.686836	7.78689e-06
	KCNE5	0.205947	0.00778955	DUSP11	-0.687079	9.00045e-05
	SFXN2	0.20593	0.000165673	OMA1	-0.687342	0.000394157
	MUC2	0.205744	0.000276674	DSEL	-0.688079	0.00153016
	FTHL17	0.205677	0.000137399	MT1P3	-0.688404	0.0032378
	LIMK1	0.205545	0.000382417	RPL21P68	-0.688409	1.61687e-05
	MAP4K1	0.205259	0.000874811	MCMDC2	-0.688544	6.93842e-06
	SHMT2	0.205151	8.70487e-07	PCYOX1L	-0.688572	0.000203957
	DOCK10	0.204897	0.000708539	TDRD1	-0.690146	2.55105e-05
	TMEM167A	0.204584	7.71939e-08	DNAAF4	-0.690261	2.43928e-05
	MAGEL2	0.204505	0.00232278	KIZ	-0.692219	0.00506219
	WIPF1	0.204181	0.000135855	HNRNPH2	-0.692284	0.0002497
	HMGA1	0.204031	0.00241895	HNRNPA1P33	-0.693118	0.000359919
	SUSD3	0.204	0.00051401	HAUS2	-0.69505	6.69942e-05
	CATSPER1	0.203843	0.00532807	SMN1	-0.695618	6.8024e-07
	TG	0.203744	0.00462865	RPS12P23	-0.696658	0.00048848
	CD68	0.203707	0.00551296	RPL18P9	-0.697272	2.06547e-05
	PTPN6	0.203379	0.000173787	MEX3C	-0.697915	0.00158029
	CDX1	0.203357	0.00217477	WDR44	-0.698011	6.188e-06
	GM2A	0.203233	0.00473257	P2RY14	-0.698168	1.41394e-06
	BCL2	0.203122	7.22979e-07	SMAD7	-0.698905	0.00126384
	SPATC1L	0.202839	0.00806043	PPP1CB	-0.699544	1.20634e-05
	FAM133B	0.202583	0.0044182	TMEM106B	-0.700825	0.00642771
	PGBD5	0.202444	0.00565826	TUBB2A	-0.70086	0.000183409
	LRMP	0.20244	0.00192551	RRM2B	-0.701056	0.00362814
	FERMT3	0.202059	0.000158003	ZNF281	-0.701328	3.40876e-05
	STYK1	0.202017	0.0105789	HIKESHI	-0.701626	5.24162e-05
	COPZ2	0.201598	0.000857091	CCNJ	-0.701848	0.000383392
	PNMA2	0.201239	0.000186686	BRI3P1	-0.702767	6.05627e-05
	FBXO2	0.201104	0.012447	UBLCP1	-0.703195	0.000248599
	PCOLCE	0.200999	0.00172248	ZNF786	-0.703438	0.000127286
	ZNF205	0.200815	0.00392746	RAB42P1	-0.704185	3.98213e-06
	RPP40	0.200811	2.04505e-07	LINC00476	-0.704306	0.00024272
	SRPRB	0.200805	8.42328e-06	ADH4	-0.70438	0.00155695
	UBE2D1	0.200723	1.05462e-06	LOC100131294	-0.705562	0.000681225
	ADAM8	0.200402	0.00274041	RANBP6	-0.705642	1.26285e-05
	CBSL	0.200377	0.0011895	RPL29P15	-0.705678	0.000308996
	GABRG2	0.200336	0.00132779	ADAM10	-0.705797	0.00174247
	PAPLN	0.200023	0.00042204	FBXO30	-0.706481	0.00131545
	APLP2	-0.200013	1.17165e-07	PPP4R2	-0.706958	9.23266e-06
	AXIN2	-0.20027	0.00744767	CAST	-0.707643	2.82859e-05
	ZNF235	-0.200481	3.25771e-05	CRNDE	-0.707866	0.00283658
	INPP1	-0.200792	9.84035e-05	RPL10P6	-0.708563	3.44482e-07
	NPR1	-0.200885	0.000284336	FRMD6-AS1	-0.710897	7.0297e-05
	PRDM16	-0.201189	0.000569052	EMBP1	-0.711896	9.15094e-06
	DDR1	-0.201245	5.51025e-05	COMMD8	-0.712619	6.8986e-05
	ANKRD19P	-0.201433	0.00816077	GRM8	-0.713126	0.00175363
	ICAM2	-0.201453	1.33633e-05	SNHG8	-0.713463	0.00233755
	F2R	-0.201467	0.00886722	SAV1	-0.714499	0.0042318
	PCDHGA12	-0.201739	2.04603e-05	GJA1	-0.714553	0.000619184
	RHOBTB2	-0.201982	0.00123689	MYO5BP3	-0.715233	1.02094e-07
	IGF1R	-0.202233	2.54975e-05	INTS8	-0.71602	0.000215071
	CCDC116	-0.202423	0.000948544	C6orf203	-0.717065	0.000933063
	CA5A	-0.202494	0.00056517	CPOX	-0.71842	0.000718206
	SCARF1	-0.202511	1.46837e-06	CMPK1	-0.718923	0.000254704
	CCDC150	-0.202655	0.0122798	CTSO	-0.719	0.000181236
	BEND7	-0.202965	2.73347e-05	PFDN4	-0.719292	0.00250647
	CCDC42	-0.203136	0.00246732	TRIM2	-0.720095	0.00141634
	SLC25A21	-0.203143	0.00652929	DACH1	-0.721099	2.42655e-07
	PER2	-0.203563	0.0112177	KIAA0408	-0.722067	3.57578e-06
	RRAS	-0.20369	3.02221e-05	FAM238B	-0.722165	0.0012857
	AFAP1L2	-0.203791	6.64176e-05	GPR65	-0.72442	0.000191348
	SH3D21	-0.204105	0.00434644	SPIN4	-0.725302	0.000467939
	SDC4	-0.204305	0.00582387	RPS27P21	-0.725617	0.000290141
	PPP1R9A	-0.204531	0.00371636	EED	-0.726347	0.000645664
	ERC1	-0.204578	0.00746786	TPT1P4	-0.726938	0.000208083
	CD55	-0.204615	0.000276038	EPB41L2	-0.727016	0.000152142
	ENDOV	-0.204785	6.11983e-06	ST13P4	-0.72771	0.000184019
	KDF1	-0.205294	0.00179644	R3HDM1	-0.728028	0.000351275
	ARAP2	-0.205314	0.00220099	FAM47E	-0.728792	0.0074479
	IPP	-0.205455	1.41165e-05	GET1	-0.728916	9.89827e-05
	KCNS3	-0.205479	0.000534832	KLF3	-0.729013	0.00577784
	PECAM1	-0.205559	6.64906e-05	SPAST	-0.729681	0.00027405
	SYNE1	-0.205607	1.67834e-05	ATG2B	-0.73005	4.83305e-05
	C12orf49	-0.206028	1.83449e-05	RPL21P69	-0.730397	0.000698834
	SLC44A3	-0.206348	0.000156028	GPBP1L1	-0.730404	8.38879e-05
	SCN2B	-0.206438	0.00467903	XRCC4	-0.730536	5.0638e-08
	PPP1R26	-0.20656	3.29032e-08	MYO10	-0.731221	0.000725076
	E2F1	-0.207171	0.00205347	RPS10P13	-0.732073	6.32834e-05
	TXK	-0.207387	0.00400035	NNT	-0.733422	6.68022e-05
	C12orf60	-0.207458	0.00419471	FCHO2	-0.733697	0.00100879
	MYL1	-0.207593	0.0113312	ZNF23	-0.73407	0.000328784
	NKAPP1	-0.207616	2.18107e-06	SOX21	-0.734138	0.00317068
	COX4I2	-0.207899	0.00083111	APPL1	-0.734808	7.72175e-05
	ZNF135	-0.208039	2.4161e-05	PRR13P3	-0.734995	0.000108525
	ATP2B4	-0.208241	1.30812e-05	LOC644667	-0.73518	6.43103e-08
	PFKFB2	-0.208243	0.000573704	NUDT21	-0.735262	2.81541e-06
	CTNND1	-0.208482	5.81313e-08	SLC4A4	-0.735739	1.77185e-05
	LRRFIP1	-0.208542	4.78853e-06	HDGFL3	-0.736419	0.000361041
	OASL	-0.20859	0.011851	VAPB	-0.736612	0.000171881
	P2RX5-TAX1BP3	-0.208658	0.000150407	NDUFB9	-0.736858	3.21975e-05
	ST7-AS1	-0.209291	2.94594e-05	NTN4	-0.737871	0.000396757
	INAVA	-0.209297	0.00874181	HNRNPH3	-0.738379	8.53892e-06
	FZD1	-0.209342	0.000226395	SNX10	-0.738857	0.00535912
	ESRP2	-0.209857	0.000588301	TMSB4XP8	-0.741074	2.115e-06
	PIP5K1B	-0.210013	0.000313086	PTGR2	-0.741786	2.99692e-07
	GAL3ST1	-0.210058	0.00237427	TPRKB	-0.741907	4.02196e-06
	GIMAP7	-0.210149	0.0050262	LINC01873	-0.742301	3.22094e-06
	RALGPS1	-0.210165	8.85587e-07	VSNL1	-0.742729	0.000256122
	DENND2A	-0.210301	2.40074e-05	RPS15AP11	-0.744685	1.24643e-05
	KLC4	-0.210322	0.000242764	CYCSP55	-0.746089	1.54441e-08
	SH3RF1	-0.21083	3.87295e-07	SREK1	-0.746101	0.000113915
	SLAIN1	-0.210981	1.02408e-05	LAMB1	-0.746182	3.81409e-05
	ASMT	-0.211037	0.00208854	HNRNPA1P35	-0.748062	9.19488e-05
	EFNA1	-0.211192	1.63595e-05	SNORA31	-0.748726	0.000260216
	EZR	-0.211289	0.00176703	NAP1L1	-0.749713	5.25585e-05
	CDH6	-0.211365	0.00490027	COL4A4	-0.749795	0.00374302
	DOCK9	-0.211551	0.000735894	TPT1P6	-0.750144	4.3732e-05
	KIF9	-0.212104	0.00866034	BCAS2	-0.750371	1.06301e-05
	PROSER3	-0.212193	1.33467e-06	RPL29P6	-0.75212	6.6674e-05
	KCTD3	-0.212294	0.000252002	ZNF561	-0.752459	0.000200512
	NDNF	-0.21241	0.000763672	LOC100132773	-0.752616	3.08369e-07
	PLCE1	-0.212444	5.28917e-05	E2F1	-0.753013	7.8206e-05
	FAM161B	-0.212661	4.61877e-06	SEPTIN11	-0.753394	6.82485e-05
	FKBP1B	-0.21273	9.22559e-06	GNA13	-0.753686	0.00112385
	CXADR	-0.213141	0.00301409	EIF3C	-0.753854	0.00105636
	PRKG1	-0.213367	0.000549698	RPL17P25	-0.753958	0.00130126
	FGFR2	-0.213677	0.00233749	KDM4A-AS1	-0.753982	0.000559821
	RASL10B	-0.213756	0.00258328	DCTN6	-0.754039	1.21699e-05
	NPHP1	-0.214091	0.00739122	TRAPPC6B	-0.754629	0.00020805
	IFIT1	-0.214304	0.00610273	DDX20	-0.754763	0.000764691
	LMNA	-0.21449	0.00438467	UTP23	-0.755971	8.61674e-06
	SIM2	-0.214689	0.00114645	ZBTB8A	-0.755996	0.0023133
	PTPRF	-0.214812	1.2817e-07	TMCC1	-0.756529	0.00652535
	HOXB5	-0.215124	0.00106628	PCDHB19P	-0.756758	0.000232924
	CKB	-0.215372	0.000100884	MRPL15	-0.756803	6.1228e-05
	PATJ	-0.215502	4.07021e-05	LOC100132658	-0.757163	0.000245426
	CDON	-0.215915	0.00204939	RPS12P11	-0.758056	0.00113938
	ABHD6	-0.216355	1.67526e-05	HMGN1P30	-0.75814	5.48372e-05
	SFTPC	-0.21675	0.00261756	RIDA	-0.758808	3.37868e-05
	CTTNBP2NL	-0.216771	0.000379495	DMC1	-0.759511	5.19461e-06
	CDC14A	-0.216772	0.00016667	ZNF608	-0.759943	0.000583332
	PLAG1	-0.216878	0.00226327	CLK1	-0.760235	1.17312e-05
	MAPRE2	-0.217096	1.17257e-09	PRPH	-0.760676	0.00433417
	LNX2	-0.217169	0.000134714	SMARCA5	-0.761986	7.58475e-05
	ZNRF3	-0.217195	7.81886e-05	LOC100129055	-0.762641	0.000603576
	ABLIM1	-0.217249	1.12028e-06	GALNT3	-0.762776	0.000127101
	SCARA3	-0.217417	0.000364968	RPS3AP43	-0.763493	0.00022138
	ALDH3B1	-0.217737	0.00019769	EDNRB	-0.76357	1.16658e-05
	EPB41L2	-0.217788	4.53478e-05	NCOA1	-0.765304	2.07695e-05
	GAB1	-0.218013	2.29658e-06	SNRPE	-0.765341	3.67212e-07
	BSPRY	-0.218463	0.0013379	RPS29P16	-0.765743	0.000230946
	BST2	-0.218473	3.32092e-05	CD46	-0.765745	8.36188e-05
	WDR31	-0.218498	0.0063022	SNORD12C	-0.766136	0.00146805
	ERMP1	-0.218883	5.60293e-08	RPL5P1	-0.766542	2.65226e-05
	PCDHAC1	-0.219156	0.000880367	BTG3	-0.76671	2.14773e-05
	SELENOW	-0.219521	1.1825e-11	IKBKB	-0.767516	9.80198e-07
	SH2D4A	-0.219912	9.47301e-06	HNRNPCL3	-0.768904	2.47809e-05
	LRRC1	-0.219938	1.66155e-05	NUBPL	-0.769186	9.26928e-06
	APC	-0.220578	0.00014056	MBD4	-0.769788	1.1332e-06
	PCDHGB2	-0.220707	0.00755502	RAPH1	-0.770316	2.59041e-05
	GUSBP1	-0.220714	1.21983e-05	LOC729086	-0.772733	0.000153801
	OBSCN	-0.220776	5.9279e-05	EDN1	-0.772941	8.1934e-06
	CUL3	-0.221293	0.000279908	UFM1	-0.77485	9.41193e-05
	SYCP3	-0.221386	0.00557648	PDIA3P1	-0.776192	0.000363972
	SPINT2	-0.221634	7.09408e-07	CIT	-0.776324	1.41983e-07
	AMOTL1	-0.222034	3.09865e-05	RPL23P6	-0.776501	0.000414283
	SNHG20	-0.222922	6.62305e-06	EIF4A2P4	-0.777604	9.04637e-05
	MST1R	-0.222982	3.82156e-07	LOC100134868	-0.777751	5.93685e-05
	ZNF585A	-0.22304	0.0103361	SLC2A3P2	-0.777851	0.000769076
	WWC1	-0.223045	0.000479466	PRPF39	-0.777932	7.78973e-05
	COL11A2	-0.22306	1.47225e-05	BLZF1	-0.778243	6.25454e-06
	PCDHB9	-0.223065	0.000407315	RPL21P131	-0.77871	2.22642e-05
	BCL6B	-0.223399	0.0017468	BMS1P16	-0.779632	3.35469e-06
	IRS1	-0.223417	4.18975e-05	MRPL19	-0.78048	4.70711e-05
	CYB561	-0.223608	8.54105e-08	CPPED1	-0.780781	0.000303669
	EFNB2	-0.223926	0.000573474	GOLGA8A	-0.78086	1.59917e-05
	ARFGEF3	-0.224488	0.00112573	MNAT1	-0.781408	0.00184917
	BTBD3	-0.224726	2.4617e-07	MAGI2	-0.781603	0.00122754
	ARRDC2	-0.224818	0.00122879	HAT1	-0.782775	0.000149341
	HPCAL1	-0.224899	1.77223e-05	SEC24D	-0.783154	0.00199872
	CAT	-0.224944	8.67591e-06	AMY2B	-0.783721	0.000245096
	GUCY1A2	-0.225079	0.00140933	RPS29P14	-0.784338	0.000651562
	MDGA1	-0.225081	0.0106114	TPM3P9	-0.784516	1.62391e-05
	SMAD7	-0.225305	3.06518e-05	FGF12	-0.786293	0.000153663
	SERTAD4	-0.22551	0.00013857	RFX2	-0.787028	0.00189467
	TMOD3	-0.225533	9.04778e-05	VRK2	-0.787098	0.0010052
	FZD5	-0.226038	0.000118557	CBWD1	-0.787449	4.63428e-10
	PARD3	-0.226157	1.91111e-08	LINC00452	-0.78751	2.93829e-05
	UXS1	-0.226213	4.09642e-12	DCAF13P3	-0.788459	4.1356e-07
	TNXB	-0.226224	2.22045e-05	UBASH3B	-0.789739	3.59023e-08
	DGKH	-0.226597	0.00208844	IFT20	-0.790496	0.000105588
	SERTAD4-AS1	-0.226881	0.000136996	FBN3	-0.790801	0.00158314
	PRRG3	-0.227356	0.0013985	ARL6IP1	-0.793004	2.08242e-05
	JUP	-0.227622	1.35085e-09	MCFD2	-0.793045	6.93802e-05
	CRMP1	-0.227751	0.00150183	RASGEF1B	-0.7934	5.46998e-07
	PLEKHH2	-0.2282	0.00988914	RPN2	-0.794519	8.55776e-06
	ZSWIM5	-0.228492	2.06331e-06	TMEM67	-0.795734	3.86246e-05
	KCNK1	-0.228592	0.00840466	SLC2A3P1	-0.796311	1.16051e-06
	CSPP1	-0.228663	0.000581516	TOPORS	-0.797044	4.24259e-07
	ST6GALNAC3	-0.228779	0.00108543	ABCA8	-0.797572	0.000205259
	PPL	-0.228799	2.7879e-05	ATMIN	-0.797989	0.000237267
	EHD3	-0.228873	0.00129921	TSPAN2	-0.79822	0.000104037
	PLS1	-0.228967	0.00405559	TUSC3	-0.798871	1.00926e-05
	TMEM35A	-0.229057	0.00149902	ANKRD44	-0.799312	1.42815e-06
	PAPSS2	-0.229198	1.47638e-05	KCNS3	-0.799511	0.0002606
	MIA2	-0.229398	0.000884745	LOC645086	-0.800165	1.3664e-07
	IGF2BP1	-0.230557	0.00012291	PTN	-0.80227	0.000270473
	PAWR	-0.230676	3.30418e-06	DDX59	-0.80419	1.11027e-05
	KRT18	-0.230728	0.00105086	ANXA2P3	-0.80459	4.97654e-06
	NECTIN3	-0.230892	1.88216e-06	SELENOT	-0.804834	3.96288e-06
	PAQR8	-0.230969	2.64457e-06	AMN1	-0.805373	0.00149244
	FAM174B	-0.231126	2.57283e-06	HSPD1P5	-0.80633	2.12574e-05
	SIRT5	-0.231314	0.00220752	DDHD1	-0.806389	2.82383e-06
	KIAA1328	-0.231403	2.71127e-10	PLAGL1	-0.806819	4.50225e-05
	VPS37B	-0.231442	6.32576e-05	GMNN	-0.807334	0.00219543
	FZD4	-0.232233	0.0012545	DYRK3	-0.807583	0.000163316
	ZNF608	-0.232382	6.92472e-06	TPT1P9	-0.807905	0.000188466
	FOXF2	-0.232415	0.000576439	RPS27P13	-0.808218	0.000330309
	ZC2HC1C	-0.232418	0.00418107	RPS11P5	-0.809072	7.87564e-06
	GALNT5	-0.232915	0.000168229	POLI	-0.809526	1.26007e-05
	SBSPON	-0.232996	0.000840425	LOC402221	-0.809991	0.000746487
	CASC15	-0.233223	3.38407e-05	PNRC2	-0.813065	3.80802e-05
	CDKL1	-0.233486	7.09789e-09	YES1	-0.813448	0.000167736
	EPS8L2	-0.233538	3.05627e-06	GIMAP7	-0.813471	0.000162688
	NKPD1	-0.233651	0.00213725	VPS26A	-0.813492	2.96437e-05
	LMCD1	-0.233814	0.000126314	KBTBD7	-0.814131	0.000450377
	ENSG00000197991	-0.233841	0.00658441	KDM3A	-0.814327	0.000180019
	ZNF454	-0.233863	9.07334e-05	FTH1P12	-0.814976	0.00015052
	SPNS2	-0.233879	6.37909e-05	PLA2G12A	-0.816066	3.69312e-05
	KLF6	-0.234193	0.00151682	POLR2J2	-0.81741	7.30374e-05
	RALA	-0.234278	4.70163e-05	ITGB6	-0.818823	0.00393338
	GNAZ	-0.234507	0.00384566	RPL21P28	-0.819198	0.000162382
	CD36	-0.234524	0.00553645	TRMT10C	-0.819602	0.00836125
	SLC6A13	-0.234681	0.00152327	MMRN2	-0.82019	3.57492e-06
	SGK2	-0.234822	0.00885928	LYPLA1	-0.820863	7.02425e-06
	ENPP1	-0.235063	0.00124018	CD302	-0.821817	0.00117649
	PTPN14	-0.235107	0.000129325	RPL26P19	-0.822074	0.000373315
	CEP85L	-0.235366	4.2463e-05	SNX14	-0.824019	2.30665e-07
	PALMD	-0.235455	9.2161e-05	CXorf21	-0.824641	1.92321e-06
	SPRED2	-0.23547	1.7752e-08	RPS27P29	-0.825341	0.000192052
	STN1	-0.235819	1.09441e-07	RPL17P36	-0.825808	0.000137606
	EFNB1	-0.236086	0.000188283	NUDT15	-0.825907	3.60684e-05
	PCYOX1	-0.236148	4.54291e-06	SDAD1P2	-0.82614	1.6198e-05
	SLC37A1	-0.236264	2.8028e-08	TUBA4A	-0.826846	0.000974145
	ARHGEF25	-0.236338	0.00372001	AP1S3	-0.828391	2.4449e-07
	WWC2-AS2	-0.236554	0.00493055	PI4K2B	-0.829211	2.3378e-06
	TES	-0.236694	1.07327e-07	BCLAF3	-0.829642	0.000536879
	TMSB4Y	-0.23671	0.000196	PSMC1P4	-0.829769	3.57896e-08
	CYP4F8	-0.236912	2.82054e-05	NT5DC1	-0.82984	2.56692e-05
	FSD1L	-0.237073	0.00474346	ESRRG	-0.830151	0.000176537
	MECOM	-0.237116	9.45939e-05	VDAC3P1	-0.830798	0.00249103
	GPC4	-0.237682	2.37893e-09	LIFR	-0.832449	0.00204332
	NPAS1	-0.237983	0.000410278	RPL9P25	-0.834358	2.79814e-06
	SEMA4G	-0.238006	1.38097e-05	HNRNPLL	-0.834997	3.40388e-05
	TBX4	-0.2385	0.00841246	CREB5	-0.835436	2.80846e-06
	TM7SF3	-0.238572	3.1502e-05	BBOF1	-0.836505	0.00128374
	ZBED9	-0.238747	0.00430314	RPL31P17	-0.83673	0.000107688
	SPATA13	-0.238762	0.000321173	FAM199X	-0.841463	0.000528263
	TAF15	-0.238974	5.40613e-06	GADD45GIP1	-0.842141	0.000679316
	NOS1AP	-0.239241	0.000153566	PURA	-0.843005	0.000137386
	SLC3A1	-0.239325	0.0102068	RPLP2P3	-0.843821	9.07044e-06
	EMCN	-0.23971	0.00102886	ZC3H11A	-0.848935	9.34184e-06
	AR	-0.240155	1.84187e-05	DAPP1	-0.849138	3.97122e-06
	FILIP1L	-0.240375	0.0106261	ARFGEF1	-0.849201	0.000145354
	FOXP2	-0.240514	0.00108925	RPS28	-0.850825	6.93289e-05
	RHOF	-0.240641	4.57584e-06	PSMC1P9	-0.852047	0.000219114
	SLC10A7	-0.240909	0.00367438	SMIM12	-0.852776	0.000309955
	LINC00842	-0.240978	0.00341913	TUBD1	-0.853148	0.000601091
	SLC39A8	-0.241006	0.000521962	ANXA3	-0.854097	5.71281e-05
	NXPH3	-0.241254	0.000591396	RTKN2	-0.854276	0.00137133
	LRRC3B	-0.241746	0.00488288	CCT6P1	-0.855184	2.62326e-07
	WFS1	-0.242214	1.01591e-05	C4orf19	-0.856824	0.000184326
	SCAI	-0.24225	0.000872205	LOC646197	-0.856895	5.41688e-05
	HIGD1B	-0.242731	0.000850184	AIMP1	-0.859319	2.78594e-06
	TNFAIP1	-0.243077	5.17753e-06	SGMS2	-0.859355	0.000330909
	TEDC1	-0.243376	2.15716e-05	RAB6A	-0.861064	0.000757938
	ZSCAN31	-0.243397	0.000421357	FNDC1	-0.861184	0.0073151
	PRDM5	-0.243818	1.85061e-06	AK2P2	-0.861823	4.54871e-05
	TIE1	-0.243896	0.0003152	NADK2	-0.862499	0.00115855
	CA5B	-0.244242	3.89705e-07	KRT4	-0.864107	0.000253578
	CALHM5	-0.244245	0.00216716	TMEM267	-0.864341	3.72817e-06
	CACNA2D3	-0.244268	0.00015018	PNRC2P1	-0.864442	8.69432e-06
	CRIP2	-0.244327	1.10378e-07	PMS2P2	-0.865006	5.66786e-06
	SHH	-0.245273	0.000484086	TSNAX	-0.865624	0.000111665
	KRT18P55	-0.245915	0.000340172	RPL7	-0.867111	8.774e-05
	MEIS1	-0.246213	1.8337e-05	RPS12P4	-0.867821	0.000141986
	MBOAT2	-0.246457	0.000114822	KIF1BP	-0.868563	4.80452e-06
	TAL1	-0.246651	0.00241105	HNRNPA1P10	-0.869218	1.58277e-05
	KERA	-0.246726	0.00216696	COL21A1	-0.869993	0.00170641
	ADRB2	-0.247208	0.000303542	SLITRK2	-0.870821	3.2758e-06
	PLEKHA1	-0.247265	1.78342e-05	MPLKIP	-0.87096	4.29394e-05
	C1orf198	-0.247409	2.12842e-05	LOC728485	-0.871481	3.38751e-05
	ZNF599	-0.2476	0.00234396	ZNF600	-0.871562	0.000356992
	CCM2L	-0.247615	0.00258727	ZNF223	-0.872974	5.54505e-06
	ZNF781	-0.248338	0.00393881	STRIP2	-0.873009	1.47677e-05
	RAB25	-0.248478	0.00330051	UBA6	-0.873069	5.80009e-05
	ZNF682	-0.248496	0.000725658	RFK	-0.874097	2.48795e-05
	RSAD2	-0.248675	0.00317994	RPS7P10	-0.874488	0.000625374
	ARAP3	-0.2488	4.3139e-05	RHOBTB1	-0.87518	0.000142276
	OTUD1	-0.248813	4.62299e-06	UBE2V1P2	-0.875743	7.12716e-05
	TAS1R1	-0.248871	0.00535226	CENPQ	-0.875855	0.00111391
	PCDHGB1	-0.248954	0.00075107	FTH1P2	-0.876695	0.000118611
	POU5F1	-0.250139	0.000492742	PIK3CA	-0.877671	0.0011683
	LGR5	-0.25015	0.00136248	TERF1	-0.87777	1.1604e-05
	PRPSAP1	-0.250154	1.47378e-07	SACM1L	-0.877827	0.000230593
	OR2A9P	-0.250188	0.00852684	RPS29P17	-0.881813	0.000178049
	SELENBP1	-0.250294	1.617e-05	LOC644310	-0.882354	8.43612e-05
	SYT17	-0.250349	6.78024e-08	TPI1P1	-0.882788	6.45189e-05
	FHDC1	-0.25044	0.0018069	BTNL10	-0.883469	2.57661e-06
	S1PR1	-0.250486	0.000320115	LOC728416	-0.884068	0.000220294
	CAVIN1	-0.250494	3.31328e-08	RBM7	-0.884113	0.000738749
	FANCC	-0.250923	1.14301e-12	FAM229B	-0.884459	4.15237e-05
	FOXD4	-0.250942	3.23418e-05	LSM5	-0.887597	8.84832e-06
	ADGRG6	-0.252635	0.000466434	ACTG1P4	-0.887701	0.000325074
	DCC	-0.252897	0.000591326	EAF1	-0.887902	0.000246501
	CDH1	-0.253115	5.2452e-05	IER3IP1	-0.889821	0.000253395
	JDP2	-0.253353	8.71446e-05	CLIC4P1	-0.890443	6.22899e-06
	ELN	-0.2534	0.00788766	MYADM	-0.890458	5.14677e-06
	TIMP3	-0.253465	0.000391656	HS2ST1	-0.893044	0.00115036
	EGFL7	-0.253779	0.00166363	PPP3CA	-0.894799	0.000143992
	STARD8	-0.253825	4.93445e-05	SLC26A4-AS1	-0.894943	5.94115e-05
	CAMK2A	-0.254139	0.00880365	MRPL47	-0.895101	1.10476e-05
	GIMAP6	-0.254322	4.99902e-05	MED13L	-0.89771	0.000105726
	C1QTNF5	-0.254987	0.000205764	ZNF226	-0.897823	0.000750471
	PPFIA4	-0.255487	0.00549238	ZNF703	-0.898603	0.000288802
	ACVRL1	-0.255572	0.00183775	MRTFB	-0.901638	0.000136989
	COL13A1	-0.255672	0.00112207	RPL12P33	-0.903023	1.38271e-11
	TRDMT1	-0.255894	0.00111436	RPL17P8	-0.904956	0.000117829
	MAL2	-0.256536	0.00115041	CDC37L1	-0.90668	2.19708e-05
	KIAA1211L	-0.256595	0.000679349	AKAP9	-0.906918	1.24143e-05
	LDB2	-0.256618	9.73598e-05	DNAJC25-GNG10	-0.908015	3.53573e-05
	RNF144B	-0.256992	1.3368e-05	RPL23AP44	-0.908133	0.000524479
	GPRC5A	-0.257053	1.66568e-05	SRSF3	-0.90931	6.32436e-06
	MTURN	-0.257814	9.63315e-06	MSTO1	-0.90969	0.000422472
	C1orf210	-0.258027	0.00094779	PCDHB16	-0.910062	0.00137576
	IL16	-0.258318	0.00396891	SLC26A2	-0.910829	1.78379e-07
	NSG2	-0.258839	0.00312763	SH3YL1	-0.911184	0.000154288
	MARVELD3	-0.259236	0.00183993	ARL13B	-0.911303	3.22147e-06
	C10orf25	-0.259739	1.53211e-05	HAS1	-0.912791	0.00360905
	HSPA12B	-0.259849	0.00188126	ZNF860	-0.913893	1.38742e-06
	PLXNA2	-0.260012	3.73213e-06	TXNDC9	-0.914074	0.000362718
	SNX25	-0.260246	0.000112156	SMARCA1	-0.916282	3.36229e-05
	RAPGEF4	-0.260426	0.00110674	U2AF1	-0.91643	2.62109e-06
	GRHL2	-0.260939	0.00264391	GLIDR	-0.916655	1.71477e-05
	ACKR4	-0.261248	4.93986e-05	LINC00526	-0.918043	2.39511e-05
	ZDHHC14	-0.262158	5.77562e-07	NKAP	-0.918737	0.00038302
	ROBO4	-0.262387	0.000353794	KCNK1	-0.919361	3.08136e-05
	RAB3IP	-0.262581	2.91626e-06	RAX2	-0.919719	1.81877e-05
	DUOX1	-0.262789	0.00233387	HMGN3	-0.92164	1.00536e-05
	RANBP17	-0.262886	1.58996e-05	PYROXD1	-0.921661	0.000557407
	AJUBA	-0.263467	1.92992e-05	CTAGE6	-0.921905	2.41065e-07
	BTC	-0.263563	0.000143615	TANK	-0.922208	3.49341e-06
	DAND5	-0.263861	0.00141383	PATE2	-0.922216	1.25911e-06
	PDGFB	-0.264078	0.000196737	TEAD3	-0.925309	0.00023978
	PCDHAC2	-0.264089	0.000898681	SSTR2	-0.925489	4.66571e-06
	STARD13	-0.264256	2.24671e-07	RPL7AP9	-0.927034	9.07009e-06
	IYD	-0.264341	0.00169996	SNORD73A	-0.927971	2.25033e-06
	NRCAM	-0.264461	0.00141822	OSBPL11	-0.929824	0.000752065
	CSNK2A1	-0.264508	1.6444e-06	LINC00597	-0.930778	0.00258273
	RASIP1	-0.264815	0.000115367	LOC643896	-0.933002	2.14863e-10
	PEG10	-0.26569	0.000512607	ITM2A	-0.933386	6.7346e-05
	LINC00482	-0.265726	1.2643e-05	HLA-G	-0.936765	3.16437e-05
	DOK6	-0.266019	5.19532e-05	NR4A2	-0.939098	0.00290985
	GDPD3	-0.266264	3.20578e-05	CYP3A5	-0.939593	2.54411e-05
	MAB21L4	-0.266494	0.0083915	MFSD14A	-0.939765	2.91695e-05
	ALS2CL	-0.266504	5.95036e-09	PSMC6	-0.939925	5.74649e-07
	ANXA8L1	-0.266748	0.00758872	ZNF738	-0.941041	1.68737e-06
	PRSS50	-0.267029	0.00656962	NKX3-1	-0.941083	0.000693067
	DKK2	-0.267729	0.00440986	CTR9	-0.941581	0.000282409
	PARD6B	-0.267934	0.00150497	C6orf120	-0.941723	0.00225468
	CAPN2	-0.268216	4.77909e-12	BCL2A1	-0.941988	3.61569e-05
	EPN2	-0.26833	3.28846e-10	MIGA1	-0.942112	2.76362e-07
	IRX2	-0.268511	0.00129964	KRT18P59	-0.944533	4.22718e-06
	CASP12	-0.268663	0.00528853	CFAP36	-0.944802	4.92386e-06
	FZD8	-0.268751	4.33522e-05	LOC653631	-0.947219	0.00160941
	TMEM178A	-0.268889	0.000689358	NDUFA3P3	-0.947973	3.07989e-06
	KIF26A	-0.269336	2.14659e-05	RHBDL2	-0.948579	1.14612e-06
	VEPH1	-0.27033	0.00721617	MIR2116	-0.948911	0.000215234
	TMEM135	-0.27038	0.000407025	FLI1	-0.948984	1.99476e-05
	NINJ2	-0.270469	7.77193e-07	TSPAN12	-0.949291	0.000177403
	ARHGEF10	-0.270892	7.07556e-06	RPL23	-0.949395	2.38426e-05
	DNAH11	-0.271171	0.000935154	ARHGAP29	-0.951977	0.000152627
	PVR	-0.271222	0.00162727	ROCK1	-0.953542	0.00236887
	FARP1	-0.271705	8.19426e-13	EIF1AX	-0.954571	2.39208e-05
	SH2D4B	-0.271792	0.0102828	ZFP1	-0.955659	0.000148629
	RAB11FIP1	-0.272389	1.10567e-07	LOC389465	-0.957498	1.68221e-05
	ATP13A4	-0.272675	0.000142639	MSH2	-0.957975	1.50114e-05
	DUSP6	-0.273254	0.000661256	MTF2	-0.958462	4.16228e-05
	ERBB2	-0.273364	2.18202e-10	LOC100131859	-0.959273	0.000194528
	HYAL1	-0.273603	2.3883e-05	CDKN2AIPNLP1	-0.962393	3.45523e-06
	ZNF366	-0.27481	0.000311062	RPL21P20	-0.96251	2.15183e-05
	GPM6B	-0.274857	0.000406081	AKAP1	-0.962614	0.00131704
	YPEL1	-0.275029	6.41298e-09	DNAJC1	-0.963903	0.000220433
	BMPER	-0.27579	0.00546799	MOSPD1	-0.96497	0.000341901
	IGFALS	-0.275873	0.000407728	PAPSS1	-0.965666	1.77464e-05
	ATOH8	-0.275912	0.000675278	HERPUD2	-0.966775	5.99586e-05
	PRICKLE2	-0.276039	2.05578e-07	NBEA	-0.969092	7.23775e-05
	USP54	-0.276255	4.35565e-08	CNTN6	-0.969178	1.2909e-05
	MPHOSPH8	-0.276838	1.59525e-05	RPS3P3	-0.974192	7.91801e-05
	ESRP1	-0.277349	6.03029e-05	NPM1P34	-0.97746	2.81967e-05
	SLIT2	-0.277625	3.13046e-05	CHMP4C	-0.978036	0.000858536
	HOPX	-0.277848	5.58519e-05	LUC7L3	-0.979789	1.4238e-06
	GREM2	-0.278697	0.000411113	PPIG	-0.980834	3.63838e-06
	SFTA2	-0.279044	0.00392395	SYAP1	-0.981242	1.95364e-06
	RETREG1	-0.279271	2.03851e-05	LOC100130353	-0.982726	3.39764e-06
	NPNT	-0.279394	7.97027e-05	TMEM106A	-0.984447	6.29059e-06
	LOC202181	-0.279751	3.47035e-08	GOLGA2P10	-0.984451	1.56604e-06
	KLF3-AS1	-0.280233	0.00287334	KRT16P2	-0.98523	0.0104588
	AQP4	-0.280506	0.00800155	ODR4	-0.985726	3.67477e-07
	C1orf116	-0.280508	0.00219437	RPS4XP16	-0.986062	1.81727e-05
	CDO1	-0.280926	0.000244576	RBMXP3	-0.986368	0.000267011
	RAMP3	-0.281378	0.00753442	RPS3AP39	-0.986438	1.04203e-06
	EXOC3L1	-0.281746	3.85986e-05	EFCAB2	-0.986495	1.87666e-06
	CELF4	-0.28175	0.00179341	RPL36AP8	-0.986544	5.66274e-05
	CAB39L	-0.281954	1.75064e-05	RPL21P39	-0.989973	7.34479e-05
	LINC00261	-0.281985	0.00491166	CCDC91	-0.994724	0.000135106
	NR1H4	-0.282146	0.00319796	MPHOSPH6	-0.996218	2.16555e-06
	DENND3	-0.282358	5.65926e-07	EIF4BP7	-0.996239	0.000284363
	ITM2A	-0.28255	1.02109e-06	ZNRF2	-0.996968	8.53155e-06
	TSPAN18	-0.282554	0.000246658	CREM	-0.997124	3.84888e-07
	SULT1A2	-0.282735	1.29308e-06	RPS29P9	-0.997179	0.000100507
	RAB17	-0.283718	2.7858e-05	RPL10AP3	-1.00099	6.29966e-06
	AFDN	-0.283759	4.09726e-07	SMAD5	-1.00143	1.59124e-06
	RAPGEF5	-0.284105	2.21995e-05	ZNF85	-1.0028	5.38474e-06
	IFT57	-0.284805	1.81405e-05	HACD4	-1.00314	2.06083e-07
	ASPN	-0.28575	0.00953863	BLVRB	-1.00315	1.18135e-05
	CST6	-0.285957	0.000168268	RHOQP3	-1.00315	0.000172607
	PGM1	-0.286044	1.8505e-09	POLR2K	-1.00361	0.000122856
	CGNL1	-0.286284	2.32757e-08	SAMSN1	-1.00375	0.000148032
	GUSBP5	-0.286328	0.00311784	LOC442064	-1.00408	2.23233e-07
	VSIG10	-0.286549	1.62259e-05	ROBO2	-1.00439	4.46909e-06
	REPS2	-0.287035	1.09614e-08	LOC728602	-1.00655	1.23444e-07
	HERC2P4	-0.287062	4.91041e-05	DPP4	-1.00671	0.000835646
	TCEAL2	-0.287238	2.92343e-05	SLC25A32	-1.00836	4.27816e-06
	GNG11	-0.287696	5.70671e-06	BOD1L1	-1.00895	2.36719e-07
	GUCA2A	-0.287987	0.00161083	ZNF43	-1.00932	1.18585e-05
	HIP1	-0.288073	1.08081e-12	UAP1	-1.0107	8.9544e-06
	ACSBG2	-0.288101	0.000313655	RPL10P8	-1.01181	9.02524e-07
	GPR39	-0.288106	6.00142e-07	GKAP1	-1.01263	0.000178753
	ST6GALNAC2	-0.288597	5.2415e-05	ZNF140	-1.01457	4.79068e-06
	KIAA1257	-0.288858	0.000540552	ATP13A4	-1.01781	1.28062e-05
	THSD1	-0.28887	0.000600364	PLA2G2D	-1.018	3.21396e-06
	SPRYD7	-0.288912	1.92565e-07	RAP1B	-1.01944	3.95862e-07
	OCA2	-0.28937	0.00169256	RPL26P16	-1.01989	0.00013244
	EDA	-0.289979	2.68357e-06	RANBP2	-1.02279	0.00078975
	TMEM44	-0.290078	3.19114e-07	ZNF420	-1.0231	2.59437e-05
	GPER1	-0.290204	0.0101616	CCDC82	-1.02453	4.79524e-09
	PCDH10	-0.290607	0.00164928	RPLP0P5	-1.02699	7.94599e-06
	LRRTM2	-0.290836	0.000193157	BAG2	-1.03023	0.000362812
	APOL3	-0.290966	1.16866e-05	RPS26P54	-1.03055	0.000189571
	TJP2	-0.290975	4.4018e-07	GGH	-1.03165	1.47649e-05
	P3H2	-0.291633	2.07644e-05	USP6	-1.03267	0.000616661
	PDZD2	-0.292064	9.51385e-05	PPIAP47	-1.03298	5.94078e-08
	CTNNBIP1	-0.292142	4.11049e-09	HNRNPA1P56	-1.03416	3.69055e-09
	PRRG4	-0.292459	6.68643e-08	RPS4XP21	-1.0371	4.65658e-06
	SUSD2	-0.292611	5.10768e-05	HNRNPCL2	-1.03784	2.2854e-10
	CNNM4	-0.292614	1.78687e-17	EPS8	-1.03854	0.000479124
	FRMD3	-0.292893	0.00033074	NUDT12	-1.04048	4.13141e-07
	WSCD1	-0.293597	0.00237108	LINC01720	-1.04063	1.91319e-07
	C3orf52	-0.293661	6.4288e-05	ZNF679	-1.04077	0.00194845
	EEPD1	-0.293743	5.352e-10	ARL6	-1.04176	1.15847e-05
	SFTA3	-0.294132	0.00289362	NAA50	-1.04183	0.000140669
	ROR1	-0.294236	3.96123e-09	GOLGA6L7	-1.04214	1.07579e-05
	TTLL7	-0.294334	3.04383e-05	SACS	-1.04734	0.000137429
	ERG	-0.294707	4.18394e-06	GNAI1	-1.04927	2.60925e-06
	PHACTR3	-0.294813	0.00389511	RPS26P53	-1.05196	3.20869e-06
	CPAMD8	-0.294999	2.1055e-05	LYSMD3	-1.05319	1.51331e-05
	LIFR	-0.295119	0.0021016	RPL21P97	-1.05916	6.38779e-05
	UNC13B	-0.29527	1.00782e-07	ITGA6	-1.06015	5.11757e-05
	SLCO2A1	-0.295396	0.00158046	FAM241A	-1.06081	1.44001e-05
	TBX5	-0.29588	0.000570734	HPGDS	-1.06123	3.39653e-05
	CACNA2D2	-0.295957	0.00095072	BMP8B	-1.06276	2.37056e-05
	GRK5	-0.296558	9.44535e-08	RPS3AP13	-1.06778	9.14975e-05
	KCNN2	-0.296652	0.00136904	RPLP1P4	-1.06894	0.000123867
	AP1S3	-0.297174	1.99074e-08	ATF1	-1.07293	0.000476938
	TRPC3	-0.297346	3.90571e-07	PEG10	-1.07443	3.37424e-05
	NSD2	-0.297526	1.38987e-05	KPNA2	-1.07443	4.15138e-05
	HSD17B6	-0.297852	0.00156731	ETAA1	-1.07519	7.24725e-05
	DCLRE1B	-0.298566	8.3467e-07	MYBL1	-1.07533	0.000157913
	ADRA1A	-0.299636	0.000111574	TRMT6	-1.07535	5.25993e-06
	C1orf115	-0.300118	3.50932e-06	VDAC1P1	-1.07564	1.9441e-09
	TOX2	-0.301093	2.11519e-06	GBP1P1	-1.07717	7.91507e-05
	PRLR	-0.301292	0.00765323	ELOVL7	-1.07792	8.4679e-07
	DPYSL3	-0.301608	1.3611e-08	RPS13P8	-1.07953	0.000585341
	BFSP1	-0.301645	7.62167e-07	TOGARAM1	-1.08024	0.000236265
	PITPNM2	-0.302515	1.37883e-05	GOLGA6L3	-1.08132	4.52994e-05
	BAALC	-0.303196	0.00109272	ECT2	-1.08304	0.000114641
	PKDCC	-0.303293	3.40858e-07	RPS3AP44	-1.08558	9.15264e-05
	TEX49	-0.303669	0.00182646	RPL21P87	-1.09043	8.82506e-05
	SLC30A4	-0.303736	4.74838e-08	C2orf69	-1.09126	4.72958e-07
	OCLN	-0.303893	3.01936e-06	CARD16	-1.09389	2.27682e-08
	EPCAM	-0.303945	0.000305857	PSG3	-1.09411	0.000164231
	CIB4	-0.303967	0.00483074	PMAIP1	-1.09417	4.50184e-05
	HS3ST3A1	-0.304276	0.00557441	FTH1P3	-1.09509	1.44604e-05
	PDE8B	-0.304456	4.67951e-06	NPM1P46	-1.0954	1.07989e-05
	NCALD	-0.305925	3.44174e-09	TTC30B	-1.09692	3.52554e-05
	LIM2	-0.306176	0.00190895	RPL17P22	-1.09743	4.66777e-05
	PXDNL	-0.306247	0.0085337	RPL32P11	-1.09875	9.72859e-05
	TNFRSF19	-0.306483	0.000228679	FTH1P11	-1.10022	7.64449e-06
	BDNF	-0.306613	0.00764641	PEX3	-1.10182	2.70786e-07
	KIAA1217	-0.306877	2.78108e-07	NUDCD2	-1.10302	0.000107913
	DIPK1B	-0.307119	0.000229724	METTL7A	-1.10346	0.000139902
	SHANK2	-0.307145	0.00010953	RPL17P33	-1.10446	0.000486683
	IL7R	-0.307317	0.000975107	ERGIC2	-1.10514	0.00145732
	KRT19	-0.307508	1.99639e-05	ECHDC1	-1.10565	0.00055199
	TEK	-0.307881	0.000224901	MOB1B	-1.10593	4.37766e-05
	CYP4Z1	-0.308287	0.00304177	TUBB7P	-1.10664	9.80351e-05
	PRKCZ	-0.308949	3.19435e-08	RPL15P22	-1.10942	4.92015e-05
	IFI27	-0.309005	1.25708e-06	RPL23AP87	-1.10952	0.00015019
	EPB41L5	-0.309062	3.06658e-06	FAM49B	-1.10999	0.00116711
	ANKS1A	-0.309086	6.84246e-10	HSPA1A	-1.11211	0.000362199
	RIPK4	-0.309436	8.29938e-06	LOC644936	-1.11218	0.000669558
	LOC90246	-0.309963	9.81202e-06	GIMAP1	-1.11463	0.00274948
	ARHGAP44	-0.310603	9.06048e-13	ACTR3	-1.11465	0.00014854
	CA2	-0.310683	0.000520058	PABPC3	-1.11596	0.000365485
	HRCT1	-0.311224	0.0125358	REL	-1.11612	0.00054034
	SGSM1	-0.311464	0.000875681	PPIAP66	-1.11736	1.11011e-05
	ANO1	-0.311516	3.21868e-06	UQCRFS1P1	-1.11785	3.68789e-07
	PCDHGA3	-0.31186	1.92026e-07	PSG9	-1.11863	2.2329e-06
	GIMAP8	-0.312004	7.31897e-05	EIF3FP2	-1.12076	3.16825e-07
	TSPAN13	-0.312794	1.6822e-06	BCHE	-1.12382	7.70152e-07
	TSPAN12	-0.313798	9.0692e-05	ZNF681	-1.12514	0.000128347
	SCD5	-0.315	6.67003e-10	CEP126	-1.12824	1.85234e-06
	TMCO2	-0.315044	0.000129619	OTUD1	-1.12857	2.94186e-05
	AGTR1	-0.315056	5.05477e-07	CCT8P1	-1.1288	5.97347e-05
	ATP6V1B1	-0.315531	0.00617594	RPS27P7	-1.13199	4.84711e-05
	FOLR3	-0.316807	0.00160945	RPL21P14	-1.13307	8.76352e-05
	CACNG4	-0.317385	1.9195e-06	HSP90AB4P	-1.13575	1.79084e-07
	TMPRSS6	-0.317498	0.00122843	BASP1-AS1	-1.13645	6.75742e-06
	ADAMTS13	-0.318044	2.29107e-11	NPM1P21	-1.13769	0.000132123
	NOSTRIN	-0.318386	0.000233524	RBMXL1	-1.14234	1.85028e-06
	LIMCH1	-0.318849	1.97735e-05	MINDY2	-1.14349	2.90076e-05
	S100A10	-0.31924	7.92172e-14	TAF4B	-1.14396	8.85513e-06
	DISP1	-0.319301	2.9082e-05	PKP4P1	-1.14551	2.68481e-06
	AFAP1L1	-0.319485	3.22922e-07	PPIAP35	-1.14628	1.49797e-05
	CCDC68	-0.319693	0.011709	RPL37P6	-1.1465	0.000354154
	GGT6	-0.319756	3.62889e-05	LOC400750	-1.14837	3.22215e-09
	KLK11	-0.320248	0.00160372	RPS4XP13	-1.14875	2.28702e-05
	RXRG	-0.320688	0.00158906	AK6P1	-1.15325	1.32388e-08
	VGLL1	-0.321354	0.000323344	RPS3AP25	-1.15363	5.74375e-05
	KANK3	-0.321545	1.21169e-05	MS4A4E	-1.15365	4.70503e-05
	SLC16A5	-0.321739	1.18014e-10	GRAMD1C	-1.15629	2.57665e-05
	FAXDC2	-0.321894	1.69663e-05	ST8SIA6-AS1	-1.15696	3.5797e-07
	MYRFL	-0.322527	0.0064765	PPIAP80	-1.15832	6.21797e-05
	FOXF1	-0.322556	0.000302064	ADH5P4	-1.15841	1.96442e-05
	MATN3	-0.32291	0.00281857	RPS8P10	-1.16684	6.09877e-05
	PRR15L	-0.323611	0.00486886	RANBP9	-1.17006	5.2233e-06
	PTN	-0.32384	6.61141e-05	TMEM65	-1.1703	2.72503e-09
	SHROOM2	-0.324162	8.88443e-07	RPL21P61	-1.17146	1.34608e-05
	CYP4Z2P	-0.324892	5.2768e-05	ZNF658	-1.17528	0.000248021
	FAM184A	-0.325409	0.00015201	GIMAP2	-1.17641	0.000529254
	TMPRSS2	-0.325557	3.28605e-05	PRR13P5	-1.18788	7.43029e-08
	MISP	-0.326004	0.000683361	LOC100130746	-1.19314	3.68046e-06
	KCNK3	-0.326351	0.000295612	EAPP	-1.19371	1.00557e-05
	RAMP2	-0.326864	0.000170767	HOMER1	-1.19415	1.73047e-05
	DLL4	-0.327144	0.000130451	ZFP36L1	-1.19739	1.17079e-05
	FAM124B	-0.327276	0.000892145	RPL26P33	-1.19788	1.81941e-05
	VSIG2	-0.327462	1.32281e-06	RPL23AP61	-1.2	2.5713e-05
	BMP6	-0.327653	9.70885e-05	PABPC1P4	-1.20067	2.46412e-05
	EPAS1	-0.328804	3.22661e-06	ARHGAP42	-1.20399	6.10858e-07
	SCNN1B	-0.329219	1.36188e-05	USP49	-1.20591	3.76415e-07
	NEDD9	-0.329531	5.53142e-06	SLC12A2	-1.20681	1.84894e-07
	EVA1A	-0.330198	8.60434e-08	BZW1	-1.20926	4.6968e-05
	HEY1	-0.330637	0.00196512	PNPLA8	-1.20985	1.45674e-05
	L3MBTL4	-0.331141	3.47447e-07	UTP3	-1.21018	7.84471e-05
	CLEC14A	-0.331385	7.06214e-06	TOP1P1	-1.21067	1.71771e-08
	LGALS4	-0.331754	0.00141709	AGR3	-1.21289	1.14684e-05
	ETV5	-0.332501	5.22457e-07	SNORD87	-1.21985	1.61993e-07
	EML1	-0.333502	2.22752e-08	SLITRK6	-1.22639	1.68134e-05
	JCAD	-0.333593	3.78248e-05	USP25	-1.22792	0.000107843
	CDH4	-0.333754	0.00205711	ZDHHC11B	-1.22914	8.67352e-08
	L1TD1	-0.333903	0.000171614	NACA4P	-1.2298	0.000284459
	MYADM	-0.334076	4.03273e-06	CALHM6	-1.23704	0.000132648
	KANK4	-0.33492	0.000251867	SLC2A14	-1.23937	7.37703e-05
	ADIRF	-0.336045	1.54788e-06	PTGES3	-1.244	0.000180541
	STARD9	-0.336334	1.40756e-07	RPL6P10	-1.24418	0.000130757
	DHRS2	-0.336522	0.000283581	CEP57	-1.24889	0.00127524
	RASL10A	-0.337157	4.79603e-06	HSP90AA2P	-1.25278	1.73075e-07
	IL20RA	-0.337727	0.00156201	GTF2H1	-1.25375	0.000121044
	PTPRB	-0.338116	6.31468e-05	KRT8P9	-1.25468	1.77277e-08
	ROBO2	-0.33833	2.02296e-05	TMA16	-1.25624	2.40828e-06
	TMEM74B	-0.338708	1.46985e-06	SNORD80	-1.25655	2.3097e-06
	TCAP	-0.338925	2.91945e-06	TUBA3D	-1.25683	2.10392e-06
	LRRN4	-0.33909	0.00013386	ZNF728	-1.25904	1.23754e-05
	TSPAN8	-0.339457	0.000952361	ZNF181	-1.2624	0.000248063
	USP43	-0.339772	0.000162285	POTEM	-1.26436	0.000127558
	ADAMTSL3	-0.340142	1.0011e-05	TUBE1	-1.26632	1.57993e-05
	FLT4	-0.340632	6.01794e-08	KRT18P28	-1.26633	1.05213e-10
	NTF4	-0.340807	0.000109483	LOC389765	-1.26637	3.05977e-07
	TUFT1	-0.340809	1.06428e-09	MEOX2	-1.27074	0.00263096
	SCN4B	-0.340909	2.37925e-05	SEC24A	-1.27734	0.000373948
	TBX2	-0.340964	1.27748e-05	RPS10P4	-1.27787	1.53841e-07
	PPFIBP1	-0.342102	4.63992e-08	ANXA2P1	-1.27898	4.07867e-06
	PTPN5	-0.342349	0.00925694	SBDS	-1.2802	2.88933e-05
	KDR	-0.342795	9.0222e-07	C1D	-1.28051	9.96962e-08
	NPR3	-0.342822	0.000555522	BBIP1	-1.28448	5.16299e-05
	COL12A1	-0.343149	9.0677e-07	RPS15AP34	-1.28515	0.000258742
	SLC26A9	-0.343731	0.00638944	CWC22	-1.29293	5.29603e-05
	NKX2-1	-0.343909	0.000430583	LGALS3	-1.29355	4.46816e-06
	AATK	-0.344404	7.89475e-08	ZBTB8OSP2	-1.29404	1.16098e-06
	PHEX	-0.346085	0.00100862	RPL7P9	-1.29408	1.08873e-05
	YIF1B	-0.346203	3.71552e-06	RPL17P18	-1.29796	9.543e-05
	PCDH12	-0.346301	0.000103186	RAP1BL	-1.29797	0.000540278
	RADX	-0.347643	7.37471e-06	NPM1P35	-1.29917	2.13563e-07
	RIMKLA	-0.348634	7.88806e-07	AP1AR	-1.30097	3.30625e-06
	FAM162B	-0.349441	6.70236e-06	RNASEH2B	-1.30595	0.000176092
	IRF6	-0.34953	6.91677e-05	WSB2	-1.30965	4.27393e-05
	ADGRL2	-0.349623	1.04141e-06	TMEM263	-1.31658	0.000592259
	FRY	-0.349812	6.21537e-10	LOC642502	-1.32083	5.65314e-06
	MFSD4A	-0.35137	5.95363e-05	SNORD36A	-1.32142	3.52781e-05
	NKD1	-0.351432	2.40735e-05	SPOPL	-1.32268	4.83778e-05
	S1PR5	-0.35278	0.00179453	HMGB1P37	-1.32305	1.58455e-05
	PRKCE	-0.352912	1.64856e-05	RPS27P9	-1.32624	0.000137526
	SHANK3	-0.353368	3.41421e-08	PPIAP33	-1.32999	1.99213e-06
	TACSTD2	-0.353688	2.78409e-06	MCTS1	-1.33039	0.000618136
	JHY	-0.354339	2.28631e-05	ADH5P3	-1.33134	8.22589e-05
	SOX7	-0.354769	0.00137708	RPS2P28	-1.33535	5.84999e-05
	ARHGEF35	-0.354935	1.76967e-05	SNORA32	-1.34011	1.851e-06
	GBP4	-0.355062	3.89362e-05	ROBO1	-1.34167	0.00024506
	LRP4	-0.355242	2.15685e-05	TYRP1	-1.34397	5.65883e-05
	BNIPL	-0.355577	0.000105423	TXNL1	-1.34499	0.00090594
	FOXA2	-0.355708	0.000284492	KRT8P45	-1.3452	1.63131e-08
	ARSD	-0.355923	1.11985e-05	NID2	-1.34538	0.000131486
	RPL23AP32	-0.356415	8.79537e-07	PSMC1P11	-1.34732	6.4085e-07
	CAV3	-0.35669	7.28639e-06	RPS26P10	-1.35501	8.73939e-06
	OR2A4	-0.35676	0.000603751	PLA2G4A	-1.35542	1.29282e-05
	TSPAN2	-0.357102	1.69935e-05	HMGN2P24	-1.35608	1.80996e-05
	KCNJ3	-0.357578	0.000670275	LY75	-1.35752	3.58196e-08
	PDK4	-0.357672	0.0027514	CLTC	-1.3584	0.000433232
	GPC5	-0.359103	0.000476161	HMGB1P1	-1.35881	6.83533e-06
	ADGRB3	-0.359985	7.41574e-05	GTF2H2	-1.35966	1.0209e-07
	MYRF	-0.360008	2.68644e-06	FTH1P20	-1.36023	5.07208e-05
	ADD2	-0.3604	0.00134852	HECA	-1.36038	0.000539881
	OTULINL	-0.361495	6.95349e-06	LOC641746	-1.36444	2.67013e-06
	B3GALNT1	-0.361588	7.43485e-08	CCAR1	-1.37314	9.56903e-06
	ERBB3	-0.362722	4.61692e-06	KATNBL1	-1.37701	4.65081e-06
	AQP1	-0.363802	4.05834e-10	EIF1AD	-1.38409	4.09221e-06
	EPB41L4B	-0.363996	3.42649e-05	ZNF521	-1.38942	0.000164988
	ODAM	-0.364329	0.000183155	PMS1	-1.38949	0.00024721
	NOS2	-0.364621	0.000615771	NPM1P42	-1.39127	7.52378e-06
	DNAH17	-0.364756	1.63435e-05	HMGN2P18	-1.39689	2.2657e-06
	ARHGEF26	-0.365541	2.44179e-06	PTMAP10	-1.39707	5.00808e-08
	ITGA3	-0.366029	1.4839e-11	SPHAR	-1.3979	4.56715e-05
	TPPP3	-0.3661	0.000507227	TFPI2	-1.39948	3.45143e-06
	CHST1	-0.367052	8.07388e-05	H3F3AP5	-1.39948	3.30673e-06
	PLLP	-0.367069	2.3351e-05	DNAJC2	-1.40203	9.79966e-06
	CAV2	-0.368626	3.69296e-07	LOC100128775	-1.40483	4.32374e-05
	SGMS2	-0.369489	0.00224039	ANP32C	-1.40541	2.73435e-06
	COL4A3	-0.36993	0.000316113	SINHCAFP2	-1.41774	5.38341e-06
	LRATD1	-0.370396	3.27334e-05	HDAC4	-1.41777	8.84738e-05
	C2CD6	-0.370869	3.93839e-05	TAF1D	-1.41884	4.53265e-05
	C20orf202	-0.37112	6.35462e-05	NDUFA5	-1.42121	2.05127e-08
	ESYT3	-0.37224	1.86064e-05	PIK3AP1	-1.42422	0.000118754
	NOTCH4	-0.372816	2.67235e-07	PPIAP43	-1.43118	0.000117304
	CCBE1	-0.372952	2.25565e-06	POSTN	-1.43157	0.000294319
	LRCOL1	-0.373074	5.12823e-05	WASHC2D	-1.43681	0.000756036
	ANOS1	-0.373132	5.639e-05	MLF1	-1.43844	9.49378e-06
	ANKRD29	-0.37334	3.71849e-10	NXT2	-1.44048	4.02941e-05
	AHNAK	-0.373838	9.74957e-12	RPS26P35	-1.44058	5.0381e-06
	SEMA6D	-0.37394	0.00113271	ZBTB2	-1.44241	3.40085e-05
	MPP3	-0.37438	2.43737e-06	LIN7C	-1.44278	5.74322e-05
	MGAT5B	-0.374699	0.00217982	PTMAP12	-1.44463	4.33219e-06
	CACNA1D	-0.374934	1.05313e-07	ESM1	-1.45279	8.09613e-07
	QRICH2	-0.375224	4.40562e-05	DYNC1LI1	-1.45662	5.17001e-06
	CITED1	-0.375662	0.00115808	C18orf32	-1.45999	0.000386391
	TRNP1	-0.376705	6.66722e-09	FAM76A	-1.46003	6.30583e-06
	SLITRK5	-0.377726	0.000274561	ANXA4	-1.46107	0.000476918
	AVPR2	-0.377767	7.913e-05	PERP	-1.47147	2.64274e-05
	LAMC2	-0.378839	1.2683e-06	NLK	-1.47308	5.68323e-05
	PPARGC1A	-0.379956	1.32326e-07	HMGB1	-1.48295	2.34889e-06
	TNFSF10	-0.380127	0.000307327	CENPC	-1.48376	7.64285e-06
	LAMA3	-0.381218	2.36608e-08	FAM162A	-1.49491	0.000531677
	ADARB2	-0.38216	2.42554e-06	LSM6	-1.49549	1.66791e-05
	RP1	-0.38353	0.00371024	PLEKHA5	-1.5033	0.000407097
	CRIP1	-0.383816	1.11808e-07	HSP90B3P	-1.51008	0.000314058
	LNX1	-0.384157	2.31232e-08	RPS4XP11	-1.51395	2.7161e-06
	GPA33	-0.38435	0.00960723	PDP1	-1.51453	8.11638e-05
	DACH1	-0.386531	2.24377e-06	FZD6	-1.5152	0.000220832
	TMEM139	-0.387753	4.05325e-06	RANGRF	-1.52251	2.77535e-06
	SLC51B	-0.388812	0.000562438	EXOC8	-1.53495	1.58227e-06
	TGFB2	-0.389028	5.24186e-08	SEPTIN7	-1.53653	0.000187498
	XKRX	-0.389224	0.000737633	RPL7P20	-1.54033	1.31449e-05
	RALGDS	-0.390048	2.15041e-09	CYP51A1	-1.54363	8.06431e-05
	IL22RA1	-0.391219	0.001065	ZBTB11	-1.55498	8.99338e-05
	C5orf38	-0.391463	1.57072e-06	SDCBPP2	-1.56316	3.47892e-05
	TCP11L2	-0.392984	4.95928e-11	TOP1P2	-1.56832	4.17836e-05
	SGCG	-0.393893	0.00106281	DCAF13	-1.57848	2.9296e-05
	KCNK17	-0.394706	6.03206e-05	HNRNPA1P36	-1.58594	2.59571e-05
	CDH13	-0.395862	2.38975e-06	MAP9	-1.59134	6.81151e-07
	EXPH5	-0.39626	5.42468e-09	RPL13P12	-1.5941	7.17339e-05
	LHFPL3	-0.399072	9.73037e-05	RAB33B	-1.6012	5.46365e-05
	ZNF365	-0.399291	1.67191e-08	CTBP2P4	-1.60634	5.90803e-08
	IQCN	-0.400376	0.000119413	CCDC102B	-1.61175	3.85628e-05
	ASB9	-0.400627	4.59822e-13	APOBEC3A	-1.61543	2.62431e-06
	PDE1C	-0.402751	5.80594e-07	PTMA	-1.61874	4.19319e-05
	BEX5	-0.405567	3.87142e-06	ANP32A	-1.63079	2.56075e-06
	NR0B2	-0.405667	0.000198892	ZNF204P	-1.63421	2.21424e-05
	AFF2	-0.405884	3.60195e-05	ARHGAP18	-1.63767	4.24818e-05
	SLC1A1	-0.406526	5.86007e-06	MIR130A	-1.64735	1.19587e-06
	GPM6A	-0.407392	3.02756e-07	AK6	-1.65171	9.09665e-06
	SEMA3B	-0.40759	2.28212e-11	SNRPGP10	-1.6525	2.06574e-08
	SEMA3G	-0.407738	0.00200244	CAPZA1	-1.65421	2.94865e-05
	CD300LG	-0.408072	0.0100141	TDP2	-1.65505	1.48519e-05
	FAM107A	-0.409147	0.000810812	PPP1R15B	-1.65737	6.90131e-07
	CALCR	-0.409888	1.09856e-05	DNAJB4	-1.66001	2.11304e-05
	MASP1	-0.410017	7.75615e-05	ZNF735	-1.66288	1.95655e-06
	TGFBR3	-0.41023	1.41997e-10	HNRNPA1P12	-1.67038	2.95527e-06
	ZFYVE9	-0.410756	6.57055e-17	RPS26P31	-1.67319	4.55501e-06
	RADIL	-0.411192	2.2829e-09	FABP5P1	-1.6793	4.29741e-07
	MST1L	-0.414222	0.000375947	HMGN2P25	-1.69918	1.30065e-07
	LIPH	-0.414336	9.0531e-06	DMXL1	-1.70319	3.62287e-05
	CCDC85A	-0.416141	1.13317e-06	COPS2	-1.70336	8.10219e-05
	VSNL1	-0.416151	2.07718e-06	GBP3	-1.7058	3.10653e-05
	AFF3	-0.417236	1.77384e-07	RPL7P59	-1.70751	9.55411e-05
	BAIAP2	-0.417715	2.13344e-08	HNRNPA3P6	-1.71028	6.80869e-06
	XKR6	-0.417817	1.92649e-05	BCLAF1P2	-1.72269	1.826e-07
	SLC25A18	-0.418197	0.000773283	FRY	-1.72373	1.02232e-06
	ARHGEF4	-0.419208	2.24939e-06	TLR1	-1.72529	0.000157836
	ZNF114	-0.42065	0.000331274	IGBP1P1	-1.74753	1.68363e-05
	WNT7A	-0.420904	2.51622e-06	TSN	-1.75302	3.16593e-06
	TBX3	-0.421419	9.91848e-07	KRT18P17	-1.75442	5.2343e-09
	SLFNL1	-0.422747	2.2108e-05	WASHC4	-1.76375	5.57693e-05
	RGS9	-0.427625	1.57006e-05	SEMA3C	-1.7806	4.15672e-06
	MYOZ3	-0.427982	1.45512e-09	MED21	-1.80264	3.31721e-06
	CIT	-0.428098	1.01146e-05	HMCN1	-1.83359	8.44778e-05
	ANGPTL5	-0.431698	0.00186307	SRSF11	-1.8627	6.70054e-05
	GYPE	-0.433268	1.19982e-07	CD164	-1.87065	4.31516e-05
	TMEM125	-0.435609	5.64614e-08	LOC100133211	-1.87306	4.11828e-07
	CYP4B1	-0.436143	4.71772e-05	IPO7P2	-1.89473	6.13829e-06
	FOLR1	-0.436393	1.00595e-07	PPIB	-1.91421	9.28774e-07
	DMRT2	-0.436503	0.000436941	ID4	-1.95111	9.20037e-05
	MARVELD2	-0.436765	3.66151e-10	B3GNT5	-1.95669	8.92185e-06
	BCHE	-0.437546	1.1563e-05	DNTTIP2	-1.97027	8.45171e-07
	LRRN3	-0.437642	7.60836e-05	ADI1	-1.98464	9.69449e-06
	MYOC	-0.438915	0.00569025	LOC391359	-2.07617	1.23898e-08
	GALNT18	-0.439768	3.56612e-12	SUMO1	-2.18535	3.16749e-06
	CYP2B6	-0.44109	2.025e-05	KLF5	-2.19525	2.61408e-06
	GJB7	-0.441352	0.00286336
	KLK1	-0.441857	0.00214435
	CABCOCO1	-0.441985	0.00665496
	CLIC5	-0.442147	5.13652e-07
	DOK7	-0.443238	7.22294e-07
	CACNG1	-0.44339	2.52686e-05
	ANKRD20A2	-0.444874	5.79962e-05
	C19orf33	-0.445563	4.37696e-11
	KCNA4	-0.446593	0.00122916
	SULT1C4	-0.446674	4.9824e-07
	LAMC3	-0.446689	2.32071e-06
	KCNG3	-0.449443	0.000548797
	SERPINA9	-0.449588	0.00034736
	GBA3	-0.450116	0.000347213
	NEDD4L	-0.450361	1.23589e-07
	KL	-0.451034	1.78941e-07
	ESM1	-0.453336	0.0076341
	P2RY1	-0.455753	4.38499e-07
	FGFBP2	-0.456526	0.000963265
	CLEC3B	-0.458425	2.60127e-08
	GALNT14	-0.458548	6.34613e-07
	FGF10	-0.460106	1.84937e-05
	SH2D1B	-0.460602	0.000400683
	RFX2	-0.46302	4.14868e-05
	CDH19	-0.463199	7.71631e-05
	FAM189A2	-0.46326	2.51369e-09
	EDNRB	-0.46356	2.93655e-06
	GKN2	-0.464102	2.93625e-05
	HTR4	-0.465084	3.23075e-05
	PGC	-0.46808	0.00128665
	KIAA0408	-0.470395	3.13113e-08
	SCEL	-0.470969	3.27646e-05
	LEPR	-0.471247	3.296e-06
	CAVIN2	-0.47187	1.43091e-07
	SEMA6A	-0.473325	4.54899e-07
	KRT72	-0.475753	0.00733617
	SULT2B1	-0.477245	1.0087e-06
	KIF12	-0.477297	2.17672e-05
	CHRM2	-0.480206	8.3883e-08
	SLITRK2	-0.480252	4.69419e-11
	SLC5A4	-0.480363	1.02191e-05
	EFCC1	-0.480421	4.12953e-07
	ANXA3	-0.480675	1.75646e-08
	QRFPR	-0.481709	0.000383564
	AJAP1	-0.481817	0.000436025
	LRRC36	-0.482105	3.14817e-05
	PRSS35	-0.482252	1.80217e-08
	OLFML2A	-0.483399	4.89271e-08
	VWA3A	-0.483524	0.0022853
	STC1	-0.484904	0.000530688
	CHRM3	-0.48513	2.71267e-08
	PRMT8	-0.486232	0.000443933
	TTLL6	-0.487714	0.00342213
	RTKN2	-0.491742	0.00082178
	SH3GL3	-0.493658	5.68943e-09
	DAPK2	-0.494088	6.97745e-12
	PLA2G1B	-0.494306	2.09926e-05
	AMZ2P1	-0.49855	0.00023538
	C10orf67	-0.499582	1.29267e-05
	TTN	-0.501531	5.52194e-05
	TNNI3	-0.501608	8.42741e-05
	KHDRBS2	-0.501776	1.84809e-07
	FYB2	-0.502649	0.000542642
	NXF3	-0.503732	2.84984e-05
	TENT5B	-0.505377	3.18348e-09
	SSTR1	-0.509288	0.000201153
	GRIA1	-0.512474	7.10076e-07
	NDRG4	-0.513315	1.0721e-05
	ADCY8	-0.513769	7.64697e-05
	BEX1	-0.514015	6.27126e-06
	RXFP1	-0.514251	2.02116e-05
	LRRC31	-0.515003	7.81126e-05
	CFAP74	-0.515359	0.00694432
	ANGPTL7	-0.515424	2.40267e-05
	CCNB3	-0.517269	3.87247e-11
	NCKAP5	-0.517877	9.30407e-08
	CTNND2	-0.518751	2.99557e-07
	STXBP6	-0.519488	4.03957e-07
	COLEC10	-0.520068	0.000111609
	SEMA3E	-0.521431	0.000314402
	NXF5	-0.530696	0.00114525
	USP27X	-0.531098	4.30151e-09
	KCNMB4	-0.531113	3.27181e-10
	PDE6A	-0.532858	7.70053e-07
	SYNPO2L	-0.53361	0.000532652
	FAM167A-AS1	-0.535671	1.30357e-05
	CAV1	-0.536063	4.71123e-11
	HSPB3	-0.539661	2.05839e-06
	LRRC19	-0.539777	6.75034e-05
	TNNC1	-0.539861	2.12681e-09
	TENM2	-0.542246	2.06989e-05
	RBP2	-0.544429	5.50533e-05
	TMEM26	-0.545055	2.19956e-06
	SEC14L4	-0.545057	6.97356e-08
	RASEF	-0.545889	0.000102081
	MUC15	-0.546321	1.94025e-05
	SEC14L3	-0.546467	0.00250786
	FAM189A1	-0.548228	6.77484e-09
	SLITRK3	-0.549433	0.000104007
	VEGFA	-0.549725	4.36629e-12
	SH3GL2	-0.553661	5.05221e-06
	PICSAR	-0.554188	2.95216e-07
	ANGPTL1	-0.554797	7.66287e-08
	WNT3A	-0.556783	1.7064e-05
	FBP2	-0.561119	5.39306e-05
	EMP2	-0.564574	7.18367e-12
	PRX	-0.565805	4.74857e-06
	HPGD	-0.566185	9.69161e-06
	NXF2	-0.567664	0.00185679
	HS3ST5	-0.568257	9.75324e-05
	LYPD6	-0.568682	6.584e-06
	ST6GALNAC5	-0.572572	3.96467e-13
	ZNF536	-0.57357	6.12254e-08
	ZDHHC11	-0.574836	3.95486e-08
	GRAMD2A	-0.576724	1.43642e-09
	CYP3A5	-0.57759	5.80165e-07
	TNN	-0.585055	7.62076e-08
	CYP2A7	-0.585716	0.00171463
	HIF3A	-0.586238	1.2427e-07
	EGFEM1P	-0.587776	2.17303e-07
	CYP3A7	-0.592257	7.38077e-08
	PRPH	-0.594885	2.64245e-11
	S100A3	-0.597745	3.7306e-07
	CA4	-0.598182	2.69475e-05
	PCYT1B	-0.607221	1.16528e-06
	ODF3L1	-0.607937	1.06845e-05
	AGER	-0.608177	1.87169e-07
	SYCP2L	-0.61026	1.95009e-06
	ASPG	-0.610524	0.000412888
	MYZAP	-0.627006	2.29392e-07
	GPIHBP1	-0.632871	2.51462e-07
	DACH2	-0.635688	7.451e-08
	VIPR1	-0.635825	0.000143714
	SERTM1	-0.638694	2.71087e-06
	RS1	-0.646722	1.47072e-09
	TMEM100	-0.650292	7.22665e-05
	FAM167A	-0.650659	3.23652e-09
	SLC27A6	-0.662702	2.01479e-06
	CDHR3	-0.666414	0.00306601
	ENSG00000175967	-0.675867	9.3859e-06
	CWH43	-0.676114	0.00910545
	FGF12	-0.678532	1.26577e-08
	HTR3C	-0.683771	0.00122797
	CT45A5	-0.685412	0.00490881
	FABP6	-0.687409	0.00448359
	CDH10	-0.692818	5.61233e-05
	LRRTM4	-0.697111	1.24122e-07
	ITLN2	-0.699488	2.48249e-05
	EDN1	-0.703947	5.24467e-10
	ZBED2	-0.708046	2.18477e-08
	ANO4	-0.726075	4.68866e-06
	CDH16	-0.72826	8.0544e-10
	SLC16A12	-0.734387	6.86778e-09
	FXYD4	-0.734656	5.08407e-12
	BRINP1	-0.752861	0.00037119
	RGS9BP	-0.760253	1.06699e-09
	PNMT	-0.78204	6.43088e-07
	TMSB15A	-0.788623	1.56351e-08
	PCDH11Y	-0.801244	4.63183e-11
	SLITRK6	-0.844243	1.44494e-08
	BTNL9	-0.849557	3.09274e-08
	SLC5A1	-0.851208	6.42855e-13
	SLC6A4	-0.857473	0.000468444
	CCK	-0.860661	5.7331e-06
	GPR158	-0.922555	4.02332e-08
	CT45A1	-0.932596	0.00169244
	KRT4	-0.974121	4.36829e-11
	SLC5A9	-0.999236	8.0446e-09
	HAPLN1	-1.05214	9.47489e-08
	SOSTDC1	-1.17914	2.5881e-09
	DPP6	-1.19327	1.032e-16
	FREM3	-1.20638	5.39419e-14
	GRM8	-1.26616	9.28886e-11
	SYT13	-1.26974	9.05771e-11
	All P values are two-sided.

## Sheet: Supplementary Data 4
	Supplemental Data 4 List of intersection genes between significantly associated modules and DEGs
	GSE47460_positive_overlapping genes	GSE47460_negative_overlapping genes	GSE76925_positive_overlapping genes	GSE76925_negative_overlapping genes
	CXCL13	NPR1	HTR2B	DPYS
	FCRLA	PRDM16	FGG	COMP
	FDCSP	ICAM2	CLECL1	HS3ST2
	COMP	F2R	TIMP4	CCL19
	GREM1	PCDHGA12	CORIN	DAPL1
	ITLN1	RHOBTB2	SPP1	TSPAN10
	CXCR5	CCDC116	SH3PXD2B	MMP11
	PLA2G2A	CCDC42	SELL	MIAT
	POU2AF1	RRAS	SERPIND1	SRPX2
	FAM30A	AFAP1L2	CEMIP	CIART
	FCRL5	SH3D21	UNC5A	SCIN
	CD19	PPP1R9A	CTSK	FCRL2
	BHLHE22	CD55	CLTRN	HOXC8
	DPEP1	ENDOV	DUSP26	ATP1B2
	MZB1	PECAM1	TARP	EYA3
	CHRDL2	SLC44A3	CNTNAP2	NPTX1
	IGLL1	SCN2B	FEM1B	ASIP
	PNOC	TXK	FCGR2B	APOE
	CEACAM8	MYL1	CXCL12	ALPK2
	BNC1	COX4I2	TMEM130	GGT5
	TNFRSF17	ZNF135	CD8A	SUGCT
	BLK	PFKFB2	ESPNL	KRT27
	TUBB3	ST7-AS1	TMEM176B	RAMP1
	COL10A1	FZD1	HP	IRX6
	CCL19	ESRP2	HSD11B1	TRABD2A
	CEMIP	GAL3ST1	GEMIN5	HSD17B14
	WT1-AS	GIMAP7	CMKLR1	SV2B
	STEAP1	DENND2A	CD209	TENM3
	JSRP1	SLAIN1	RHEX	KRT222
	IGDCC4	ASMT	LINC00926	ASB16
	TMEM229A	EFNA1	VEGFD	MFSD2A
	MGC16025	CDH6	PTGER1	CHI3L2
	WT1	DOCK9	STEAP2	RSPO1
	TNFRSF13B	KCTD3	RPP25	PCP4
	SPIB	PLCE1	OTC	PDCD4-AS1
	CPXM1	FKBP1B	ELANE	LINC02591
	GDF6	PRKG1	TMEM117	C2orf88
	CLEC4G	FGFR2	ORM2	PDCD2L
	SFRP2	RASL10B	SLC22A15	DPH7
	AMPD1	IFIT1	CARD6	BMF
	BFSP2	SIM2	CCN5	GAS2
	JCHAIN	HOXB5	CHRDL2	ZNF79
	GPR78	ABHD6	FCRLB	SLA2
	DOCK3	CTTNBP2NL	ZNF597	PGBD5
	SMR3A	PLAG1	SPOCK1	SPAG4
	COL14A1	LNX2	IRAK4	GJB2
	TSPEAR	ZNRF3	ZNF77	ATF7IP2
	SYT4	EPB41L2	ORM1	CDCA7
	PCSK1	GAB1	ANKRD22	PARP16
	FCRL2	BSPRY	UBFD1	SIRT4
	FER1L4	BST2	PCBP3	HLA-DOB
	SLC2A5	SH2D4A	SLC45A3	CKMT2
	NXPE4	PCDHGB2	CHN2	HYAL3
	ASTN1	OBSCN	NXPH3	FBLN7
	MEOX1	CUL3	PLA1A	TMEM86A
	CD27	SYCP3	MTMR12	SLC5A3
	MMP11	AMOTL1	SCARNA9	HOXB7
	SERPINF1	ZNF585A	ZNF702P	SAMD4A
	SPAG4	WWC1	PGBD3	SDK2
	CD79B	COL11A2	SMIM8	ZMIZ1-AS1
	RET	PCDHB9	PDE6B	PRSS53
	CCDC80	BCL6B	TMEM37	CD1B
	CTHRC1	IRS1	SNAP25	TMEM177
	CILP	EFNB2	MPZL1	PALB2
	PIM2	ARFGEF3	LOC441241	RAB33A
	ACBD4	BTBD3	AEBP1	MYO7A
	ESR2	ARRDC2	HEXA	AIFM2
	S100A9	HPCAL1	GLRB	FBXL8
	ALPK2	GUCY1A2	WHSC1L2P	SNORD48
	ISLR2	MDGA1	GATM	METTL16
	P2RX5	SMAD7	EPHB1	ART4
	SMOC2	FZD5	ZNF350	TMEM268
	CD79A	TNXB	CLSTN2	SNORD95
	IRF4	DGKH	XAGE1A	METTL4
	TIMP1	CRMP1	MMACHC	LINC00426
	PODNL1	PLEKHH2	CINP	PTGDR
	SCRG1	ST6GALNAC3	BCAT1	ZNF192P1
	CACNA1I	PPL	MPP6	AKAP10
	CTSK	EHD3	TXNDC5	LPCAT2
	FRZB	PLS1	ATP6V1E2	ZNF605
	WNT10A	TMEM35A	STIMATE	ZNF507
	S100A12	PAPSS2	SPTLC3	STAB2
	ALDH1A2	MIA2	ZFP37	EPHB6
	TNFRSF13C	FAM174B	SERPINB9P1	HRC
	SRRM3	SIRT5	DNAJC3	MAP4K1
	VWCE	FZD4	RPL29	NSG1
	FCN1	ZNF608	PTGDS	CSPG5
	AIM2	FOXF2	POP1	ARRDC5
	KCND2	GALNT5	HPS3	BTRC
	IGF1	SBSPON	ALDH1A2	DLG2
	PDK1	EPS8L2	MAP10	ICOS
	PROK2	NKPD1	AQP11	TRIM63
	TMEM154	LMCD1	CLEC5A	MDN1
	DOK5	ENSG00000197991	USP30	RAD54B
	PODN	ZNF454		FKBP10
	NLRP7	SPNS2		COLGALT2
	ASGR2	RALA		FER1L4
	TNFRSF10C	GNAZ		NCR3
	KCNH8	CD36		TLCD1
	SERPINE2	SLC6A13		CACNA1I
	CPNE5	ENPP1		NMUR2
	NPTX2	PALMD		ADGRG5
	PDE1A	SPRED2		SYNGR1
	ZNF843	EFNB1		SMC1A
	SULF1	PCYOX1		CXorf65
	CCR3	ARHGEF25		LCNL1
	FHL2	MECOM		SCAMP5
	SCG2	TBX4		NHLRC2
	GREB1	NOS1AP		KLF15
	STAB2	EMCN		ZNF74
	GALNT9	AR		ABCD1
	EGFLAM	LINC00842		ASB16-AS1
	SHISA7	NXPH3		ALDH18A1
	ITGA11	LRRC3B		ZNF814
	NGFR	WFS1		TSHZ2
	CCDC177	HIGD1B		GNB3
	OAF	ZSCAN31		FERMT1
	SV2B	PRDM5		SOS1
	FKBP11	TIE1		SEPTIN1
	PDGFD	CA5B		NF1
	FBLN2	CALHM5		DOCK3
	CCR7	CACNA2D3		SEMA4D
	GLIS1	CRIP2		BLM
	CALB2	MEIS1		RNASEH2C
	C5orf58	MBOAT2		EOMES
	ADGRG3	TAL1		TTC7B
	TNFRSF18	ADRB2		MIR100HG
	RARRES1	C1orf198		ADPRM
	STK32B	ZNF599		SCARNA3
	CLECL1	CCM2L		CNTLN
	C21orf58	ZNF682		TMEM266
	NYX	RSAD2		CHCHD6
	POM121L9P	ARAP3		MRAS
	TMEM156	OTUD1		CHMP7
	ZNF385D	TAS1R1		GSTM4
	KLHL14	PCDHGB1		ARIH2OS
	ZNF215	LGR5		TLN2
	EAF2	PRPSAP1		RNF214
	SLC38A11	OR2A9P		CAPN11
	S100A8	SELENBP1		UCHL1
	GSC	FHDC1		BEAN1
	TBC1D27P	S1PR1		MPV17L2
	CYTL1	CAVIN1		SLC27A5
	FAM43B	FOXD4		THEM4
	COCH	ADGRG6		SCN3B
	FMO1	DCC		CADPS
	CREB3L1	ELN		RNF41
	NKAIN2	TIMP3		C3orf18
	MOXD1	EGFL7		IKBKE
	PAMR1	STARD8		INTS4P2
	C12orf42	CAMK2A		SMDT1
	SCN1B	GIMAP6		FAM20C
	RAB3IL1	C1QTNF5		ASB13
	SRPX2	PPFIA4		CPNE5
	CNR2	ACVRL1		ZIK1
	VNN2	COL13A1		HOXB4
	SCAMP5	MAL2		CLSTN3
	APOD	LDB2		AMDHD1
	PFKL	RNF144B		TMC8
	SLC2A4	GPRC5A		IL16
	NFE2	MTURN		MPHOSPH9
	PCSK1N	C1orf210		KLHL21
	CPXM2	NSG2		STAG3L4
	SPINK2	MARVELD3		TARSL2
	ADH4	C10orf25		CA11
	ADRA2A	HSPA12B		CARNS1
	SFRP1	PLXNA2		ACE2
	PLTP	RAPGEF4		CAMK2A
	RASGRF2	GRHL2		ANKHD1-EIF4EBP3
	ALDH1A3	ACKR4		NEK6
	LINC00926	ZDHHC14		CYB561A3
	MFAP2	ROBO4		CD320
	C7	RAB3IP		MRAP
	RGL4	DUOX1		PUS7L
	FCMR	RANBP17		CSMD2
	CMTM2	AJUBA		GAB3
	STARD5	PDGFB		EPG5
	NLGN1	PCDHAC2		KMO
	MMP17	STARD13		SLC22A18AS
	MMP25	IYD		EMC8
	UBE2QL1	NRCAM		S100A1
	HRC	CSNK2A1		REM2
	OSR2	RASIP1		GREB1
	BPIFB2	LINC00482		LOXL3
	TREML2	DOK6		UBE2L3
	FFAR2	GDPD3		QRSL1
	RUNX2	MAB21L4		GATA3
	NIBAN3	ALS2CL		ADRA1B
	VIPR2	ANXA8L1		PUSL1
	ANGPT2	DKK2		KDM4C
	OR10H2	PARD6B		STX17
	HLA-DOB	EPN2
	FAM131C	IRX2
	DCLK1	CASP12
	BLOC1S5-TXNDC5	FZD8
	COLEC11	TMEM178A
	GLT1D1	KIF26A
	MPO	VEPH1
	SPON1	NINJ2
	ITGBL1	ARHGEF10
	SPNS3	SH2D4B
	C3	ATP13A4
	ZBP1	HYAL1
	C1R	ZNF366
	MEI1	GPM6B
	SYNGR4	YPEL1
	LOX	BMPER
	RGMA	IGFALS
	BEND6	ATOH8
	IL23A	PRICKLE2
	DCX	ESRP1
	DEPTOR	SLIT2
	LRRN2	HOPX
	RCN3	SFTA2
	LCE1C	RETREG1
	LRFN5	NPNT
	SYNGR1	LOC202181
	ENSG00000271434	AQP4
	SPSB4	C1orf116
	C1S	CDO1
	RIPOR2	RAMP3
	BHMT2	EXOC3L1
	TTYH1	CELF4
	DGAT2	LINC00261
	CDH22	NR1H4
	CEACAM20	DENND3
	KCND1	ITM2A
	LINC02381	TSPAN18
	RBP7	SULT1A2
	FBLIM1	RAB17
	AEBP1	AFDN
	ACTL6B	RAPGEF5
	C1orf158	IFT57
	ZNF469	ASPN
	RHBDL1	CST6
	CDA	PGM1
	SULF2	CGNL1
	PAX4	VSIG10
	ROR2	TCEAL2
	TSHZ2	GNG11
	GPR32	GUCA2A
	SPCS3	HIP1
	AMPD2	GPR39
	DLG2	THSD1
	SNAI2	SPRYD7
	EMX1	EDA
	NRXN2	TMEM44
	CLIP3	GPER1
	LGALS12	PCDH10
	CDKN2A-DT	APOL3
	MIR7-3HG	TJP2
	WNT10B	P3H2
	MNDA	PDZD2
	ELOVL4	CTNNBIP1
	EVX1	SUSD2
	PTGIS	FRMD3
	SLC1A4	WSCD1
	ALG1	EEPD1
	MEX3D	SFTA3
	MMP23B	ROR1
	ABCG4	TTLL7
	OXT	ERG
	CHST13	PHACTR3
	SMOC1	CPAMD8
	RGS18	LIFR
	KCTD4	UNC13B
	C16orf74	SLCO2A1
	XRCC6P5	CACNA2D2
	AIRE	GRK5
	FBLN1	KCNN2
	ITIH1	TRPC3
	LINC00626	HSD17B6
	FAM178B	DCLRE1B
	GCA	ADRA1A
	PLB1	C1orf115
	SYNGR3	TOX2
	GAS7	PRLR
	TUBB4A	BFSP1
	LFNG	PITPNM2
	TGFB3	BAALC
	RBP5	PKDCC
	GPX8	TEX49
	LCE1A	OCLN
	OR2H1	CIB4
	SUGCT	PDE8B
	ACTN3	NCALD
	WFDC3	LIM2
	OR11A1	BDNF
	KRTAP2-4	KIAA1217
	KRTAP1-3	DIPK1B
	MAGEB2	SHANK2
	CD4	IL7R
	NGF	KRT19
	MXRA8	TEK
	CCL24	IFI27
	KDELR3	EPB41L5
	GXYLT2	ANKS1A
	MT3	RIPK4
	TMEM151A	LOC90246
	TUBA3D	HRCT1
	CTRB2	SGSM1
	KRT85	ANO1
	MUC2	PCDHGA3
	MAGEL2	GIMAP8
	COPZ2	TSPAN13
	PCOLCE	TSPAN12
	ZNF205	SCD5
	ADAM8	AGTR1
	GABRG2	ATP6V1B1
	PAPLN	FOLR3
		CACNG4
		ADAMTS13
		NOSTRIN
		LIMCH1
		DISP1
		AFAP1L1
		CCDC68
		RXRG
		VGLL1
		KANK3
		SLC16A5
		FAXDC2
		FOXF1
		MATN3
		PRR15L
		PTN
		SHROOM2
		CYP4Z2P
		TMPRSS2
		MISP
		KCNK3
		RAMP2
		DLL4
		FAM124B
		VSIG2
		BMP6
		EPAS1
		SCNN1B
		EVA1A
		HEY1
		CLEC14A
		LGALS4
		ETV5
		EML1
		JCAD
		CDH4
		KANK4
		ADIRF
		STARD9
		DHRS2
		PTPRB
		ROBO2
		TMEM74B
		TCAP
		LRRN4
		ADAMTSL3
		FLT4
		NTF4
		TUFT1
		SCN4B
		TBX2
		PPFIBP1
		PTPN5
		KDR
		NPR3
		COL12A1
		NKX2-1
		AATK
		PHEX
		YIF1B
		PCDH12
		RIMKLA
		FAM162B
		ADGRL2
		FRY
		MFSD4A
		NKD1
		S1PR5
		PRKCE
		SHANK3
		TACSTD2
		ARHGEF35
		GBP4
		LRP4
		BNIPL
		FOXA2
		RPL23AP32
		CAV3
		TSPAN2
		PDK4
		GPC5
		ADGRB3
		MYRF
		ADD2
		OTULINL
		B3GALNT1
		ERBB3
		AQP1
		ODAM
		NOS2
		DNAH17
		ARHGEF26
		ITGA3
		CHST1
		PLLP
		CAV2
		COL4A3
		LRATD1
		C2CD6
		C20orf202
		ESYT3
		NOTCH4
		CCBE1
		LRCOL1
		ANOS1
		ANKRD29
		AHNAK
		SEMA6D
		MPP3
		MGAT5B
		CACNA1D
		QRICH2
		TRNP1
		AVPR2
		LAMC2
		PPARGC1A
		TNFSF10
		LAMA3
		ADARB2
		DACH1
		TMEM139
		SLC51B
		TGFB2
		C5orf38
		SGCG
		KCNK17
		CDH13
		ZNF365
		ASB9
		PDE1C
		BEX5
		NR0B2
		AFF2
		SLC1A1
		GPM6A
		SEMA3B
		SEMA3G
		CD300LG
		CALCR
		MASP1
		TGFBR3
		ZFYVE9
		RADIL
		MST1L
		LIPH
		CCDC85A
		VSNL1
		AFF3
		BAIAP2
		XKR6
		SLC25A18
		ARHGEF4
		WNT7A
		TBX3
		SLFNL1
		RGS9
		MYOZ3
		GYPE
		TMEM125
		CYP4B1
		FOLR1
		DMRT2
		MARVELD2
		BCHE
		LRRN3
		GALNT18
		CYP2B6
		CLIC5
		DOK7
		ANKRD20A2
		C19orf33
		KCNA4
		SULT1C4
		LAMC3
		GBA3
		NEDD4L
		KL
		ESM1
		P2RY1
		FGFBP2
		CLEC3B
		GALNT14
		SH2D1B
		CDH19
		FAM189A2
		EDNRB
		GKN2
		PGC
		KIAA0408
		SCEL
		LEPR
		CAVIN2
		SEMA6A
		KRT72
		SULT2B1
		KIF12
		CHRM2
		SLITRK2
		SLC5A4
		EFCC1
		ANXA3
		AJAP1
		LRRC36
		PRSS35
		OLFML2A
		CHRM3
		RTKN2
		SH3GL3
		DAPK2
		PLA2G1B
		C10orf67
		TTN
		KHDRBS2
		NXF3
		TENT5B
		SSTR1
		GRIA1
		NDRG4
		ADCY8
		BEX1
		RXFP1
		LRRC31
		ANGPTL7
		CCNB3
		NCKAP5
		CTNND2
		STXBP6
		COLEC10
		SEMA3E
		KCNMB4
		PDE6A
		SYNPO2L
		CAV1
		LRRC19
		TNNC1
		TENM2
		RBP2
		TMEM26
		SEC14L4
		FAM189A1
		VEGFA
		SH3GL2
		PICSAR
		ANGPTL1
		WNT3A
		EMP2
		PRX
		HPGD
		HS3ST5
		LYPD6
		ST6GALNAC5
		ZNF536
		GRAMD2A
		CYP3A5
		TNN
		HIF3A
		CYP3A7
		PRPH
		S100A3
		CA4
		AGER
		SYCP2L
		ASPG
		MYZAP
		GPIHBP1
		DACH2
		VIPR1
		SERTM1
		RS1
		TMEM100
		FAM167A
		SLC27A6
		ENSG00000175967
		FGF12
		HTR3C
		CT45A5
		CDH10
		LRRTM4
		ITLN2
		EDN1
		ZBED2
		ANO4
		CDH16
		FXYD4
		BRINP1
		RGS9BP
		PNMT
		TMSB15A
		BTNL9
		SLC5A1
		SLC6A4
		CCK
		GPR158
		CT45A1
		KRT4
		SLC5A9
		HAPLN1
		SOSTDC1
		DPP6
		FREM3
		GRM8

## Sheet: Supplementary Data 5
	Supplemental Data 5 Feature genes selected by LASSO in GSE47460 and GSE76925
	GSE47460_genes	GSE47460_value	GSE47460_genes	GSE47460_value
	ADAMTS13	-0.416489	CCL19	0.0637533
	ANGPTL1	-0.0355327	CXCL12	0.0440832
	BHLHE22	0.0520663	DUSP26	0.127994
	CDH16	-0.306123	FGG	0.0618061
	DACH2	-0.0581629	GAS2	0.0518625
	EEPD1	-1.04332	GEMIN5	0.164079
	FCN1	0.127943	HTR2B	0.127328
	FREM3	-0.350969	MIR100HG	0.0768653
	GALNT14	-0.26191	NF1	0.589072
	GPR39	-0.444565	PGBD3	0.253099
	HRC	0.0282653	SLC5A3	0.0620496
	ISLR2	0.16792	SV2B	0.0583477
	MFAP2	0.229383	TARP	0.095664
	NFE2	0.299862	TIMP4	0.0661513
	ROR1	-0.51878	TMEM117	0.30288
	SCN1B	0.0293862	TMEM176B	0.0925507
	SLC16A5	-0.262074	VEGFD	0.111708
	SYNGR1	0.0274201
	TSPEAR	0.236465
	ZBED2	-0.103511
	ZFYVE9	-0.881615
	Abbreviations: LASSO = Least Absolute Shrinkage and Selection Operator

## Sheet: Supplementary Data 6
		Supplemental Data 6 Feature genes selected by LASSO, Elasticnet, Random Forest, and SVM-RFE in GSE47460 and GSE76925 using 38-gene signature
		Elasticnet				Ramdom forest				LASSO				SVM-RFE
		GSE47460_genes	GSE47460_value	GSE76925_genes	GSE76925_value	GSE47460_genes	GSE47460_value	GSE76925_genes	GSE76925_value	GSE47460_genes	GSE47460_value	GSE76925_genes	GSE76925_value	GSE47460_genes	GSE76925_genes
		GAS2	0.487974	BHLHE22	0.149566	BHLHE22	0.0299515	HTR2B	0.0247878	ANGPTL1	-0.0717363	ANGPTL1	-0.0469751	ZFYVE9	BHLHE22
		NFE2	0.426469	CCL19	0.0930448	ZFYVE9	0.0166984	BHLHE22	0.0189685	CDH16	-0.34553	BHLHE22	0.110631	EEPD1	SLC5A3
		MFAP2	0.386073	CXCL12	0.0548494	FREM3	0.0141533	NF1	0.0111986	DACH2	-0.128535	CCL19	0.0998102	FGG	NF1
		VEGFD	0.328827	DUSP26	0.201484	EEPD1	0.00951514	TMEM117	0.00855415	DUSP26	0.113196	CXCL12	0.0862359	BHLHE22	TIMP4
		FCN1	0.243026	FGG	0.0784522	SLC16A5	0.00757284	GAS2	0.00799766	EEPD1	-1.37077	DUSP26	0.207504	FREM3	HTR2B
		ISLR2	0.220574	GAS2	0.127446	FGG	0.00723132	MIR100HG	0.00734036	FCN1	0.242106	FGG	0.0771843	GAS2	TARP
		SCN1B	0.219792	GEMIN5	0.315469	ROR1	0.00547413	SLC5A3	0.00692024	FGG	0.0170094	GAS2	0.136699	SLC16A5	CXCL12
		TSPEAR	0.170457	MIR100HG	0.0100851	ISLR2	0.00521315	GEMIN5	0.00682787	FREM3	-0.399673	GEMIN5	0.329338	GALNT14	MIR100HG
		DUSP26	0.0809751	NF1	0.727077	GAS2	0.0047059	TIMP4	0.00627788	GALNT14	-0.521528	HTR2B	0.0248441	ROR1	TMEM117
		SYNGR1	0.078461	PGBD3	0.339013	TSPEAR	0.00465765	SV2B	0.005131	GAS2	0.455	MIR100HG	0.0878418	TSPEAR	SV2B
		FGG	0.00215317	SLC5A3	0.295139	CDH16	0.00460517	CXCL12	0.00485741	GPR39	-0.604443	NF1	0.663753	CDH16	SYNGR1
		ANGPTL1	-0.0433007	SV2B	0.0819353	GALNT14	0.00379185	SYNGR1	0.00445389	HRC	0.0153295	PGBD3	0.360538	SYNGR1	GEMIN5
		ZBED2	-0.0697655	TARP	0.147642	GPR39	0.00347989	CCL19	0.00363978	ISLR2	0.239784	SLC5A3	0.272059	GPR39	ANGPTL1
		DACH2	-0.118512	TIMP4	0.157575	CXCL12	0.00304486	DUSP26	0.0030663	MFAP2	0.356907	SV2B	0.100516	ISLR2	PGBD3
		SLC16A5	-0.141247	TMEM117	0.277553	NFE2	0.00261641	TARP	0.00297492	NFE2	0.420925	TARP	0.153123	ZBED2	FGG
		CDH16	-0.365375	TMEM176B	0.17199	SYNGR1	0.00259915	PGBD3	0.00272519	ROR1	-0.798532	TIMP4	0.151632	TIMP4	GAS2
		FREM3	-0.441944	VEGFD	0.183459	FCN1	0.00248857	ANGPTL1	0.00270784	SCN1B	0.213724	TMEM117	0.258746	MFAP2
		GALNT14	-0.530733			DACH2	0.00227167	FGG	0.001884	SLC16A5	-0.177566	TMEM176B	0.158596	DACH2
		GPR39	-0.605417			ANGPTL1	0.0017705	TMEM176B	0.00109205	SYNGR1	0.110257	VEGFD	0.176719	ANGPTL1
		ROR1	-0.851017			ZBED2	0.0011309	HRC	0.000544173	TSPEAR	0.179138			FCN1
		ZFYVE9	-1.35554			GEMIN5	0.000987089	VEGFD	0.000342367	VEGFD	0.277108			NFE2
		EEPD1	-1.43164			HRC	0.000875112	SCN1B	0.000199842	ZBED2	-0.105705			CXCL12
						MFAP2	0.000822245	ROR1	9.01484e-05	ZFYVE9	-1.27193			GEMIN5
						TIMP4	0.000487012	EEPD1	-9.90517e-05					SCN1B
						SCN1B	0.000457637	FCN1	-0.000146801					HRC
						CCL19	0.000284304	TSPEAR	-0.000149683					SV2B
						PGBD3	8.43999e-05	NFE2	-0.000201774					HTR2B
						SV2B	1.99443e-05	DACH2	-0.000206954					TMEM176B
						VEGFD	1.87819e-05	ZBED2	-0.000244032					VEGFD
						TMEM117	1.54522e-05	SLC16A5	-0.000286678					DUSP26
						TMEM176B	6.12811e-06	MFAP2	-0.000293865					TMEM117
						NF1	-6.58774e-05	ISLR2	-0.000352383
						HTR2B	-0.000163163	ZFYVE9	-0.000537471
						DUSP26	-0.000166095
		Abbreviations: LASSO = Least Absolute Shrinkage and Selection Operator, SVM-RFE = Support Vector Machine Recursive Feature Elimination

## Sheet: Supplementary Data 7
	Supplemental Data 7 Accuracy assessment of models built with 13 genes using 20 machine learning algorithms in the training and validation datasets from GSE47460 and GSE76925
	GSE47460				GSE76925
	model	TrainSet Accuracy	TestSet Accuracy	type	model	TrainSet Accuracy	TestSet Accuracy	type
	Random Forest	1	0.909722	Precision	Extra Tree	1	0.894737	Accuracy
	Extra Tree	1	0.893548	Precision	Extra Tree	1	0.89272	Precision
	Random Forest	1	0.890244	Accuracy	Decision Tree	1	0.870833	Precision
	Extra Tree	1	0.890244	Accuracy	GradientBoosting	1	0.870833	Precision
	Extra Tree	1	0.862185	F1-Score	Decision Tree	1	0.868421	Accuracy
	Random Forest	1	0.858159	F1-Score	Random Forest	1	0.868421	Accuracy
	Extra Tree	1	0.842456	Recall	AdaBoost	1	0.868421	Accuracy
	Random Forest	1	0.831228	Recall	GradientBoosting	1	0.868421	Accuracy
	AdaBoost	1	0.817073	Accuracy	Extra Tree	1	0.864286	F1-Score
	AdaBoost	1	0.789825	Recall	AdaBoost	1	0.853535	Recall
	AdaBoost	1	0.786569	F1-Score	Random Forest	1	0.846429	Precision
	AdaBoost	1	0.783654	Precision	Extra Tree	1	0.845118	Recall
	GradientBoosting	1	0.768293	Accuracy	AdaBoost	1	0.844135	F1-Score
	GradientBoosting	1	0.765965	Recall	AdaBoost	1	0.836538	Precision
	GradientBoosting	1	0.744548	F1-Score	Random Forest	1	0.835498	F1-Score
	GradientBoosting	1	0.736875	Precision	Random Forest	1	0.826599	Recall
	Decision Tree	1	0.731707	Accuracy	Decision Tree	1	0.824561	F1-Score
	Decision Tree	1	0.717193	Recall	GradientBoosting	1	0.824561	F1-Score
	Decision Tree	1	0.70172	F1-Score	Decision Tree	1	0.799663	Recall
	Decision Tree	1	0.695762	Precision	GradientBoosting	1	0.799663	Recall
	ANN	0.984663	0.804912	Recall	SVM	0.982301	0.947368	Accuracy
	ANN	0.979675	0.853659	Accuracy	ANN	0.982143	0.744108	Recall
	ANN	0.977592	0.818718	F1-Score	SVM	0.976806	0.965517	Precision
	ANN	0.971591	0.839188	Precision	SVM	0.976806	0.932143	F1-Score
	SVM	0.943089	0.890244	Accuracy	SVM	0.976806	0.909091	Recall
	SVM	0.941408	0.873563	Precision	Voting	0.973451	0.894737	Accuracy
	SVM	0.935578	0.869033	F1-Score	ANN	0.973451	0.789474	Accuracy
	SVM	0.930446	0.864912	Recall	Voting	0.970854	0.872054	Recall
	Voting	0.914634	0.865854	Accuracy	ANN	0.966319	0.744108	F1-Score
	Voting	0.91193	0.83614	Recall	Voting	0.965594	0.872054	F1-Score
	Voting	0.905886	0.839929	F1-Score	Logistic Regression	0.964901	0.872054	Recall
	Voting	0.90082	0.844109	Precision	Logistic Regression	0.964602	0.894737	Accuracy
	Linear Regression	0.894309	0.829268	Accuracy	Voting	0.960643	0.872054	Precision
	Ridge Regression	0.894309	0.829268	Accuracy	Linear Regression	0.955752	0.868421	Accuracy
	Logistic Regression	0.894309	0.817073	Accuracy	Ridge Regression	0.955752	0.868421	Accuracy
	RidgeCV	0.886179	0.829268	Accuracy	RidgeCV	0.955752	0.868421	Accuracy
	BayesianRidge	0.886179	0.829268	Accuracy	BayesianRidge	0.955752	0.868421	Accuracy
	Logistic Regression	0.884766	0.778596	Recall	Logistic Regression	0.954618	0.872054	F1-Score
	Linear Regression	0.883502	0.797306	Precision	ANN	0.953125	0.744108	Precision
	Ridge Regression	0.883502	0.797306	Precision	Linear Regression	0.94766	0.826599	Recall
	Logistic Regression	0.882496	0.781721	F1-Score	Ridge Regression	0.94766	0.826599	Recall
	SGD	0.882114	0.829268	Accuracy	RidgeCV	0.94766	0.826599	Recall
	Linear Regression	0.881098	0.802885	F1-Score	BayesianRidge	0.94766	0.826599	Recall
	Ridge Regression	0.881098	0.802885	F1-Score	Logistic Regression	0.945515	0.872054	Precision
	Logistic Regression	0.88038	0.785201	Precision	Linear Regression	0.942657	0.835498	F1-Score
	Linear Regression	0.878853	0.809825	Recall	Ridge Regression	0.942657	0.835498	F1-Score
	Ridge Regression	0.878853	0.809825	Recall	RidgeCV	0.942657	0.835498	F1-Score
	RidgeCV	0.874299	0.797306	Precision	BayesianRidge	0.942657	0.835498	F1-Score
	BayesianRidge	0.874299	0.797306	Precision	SGD	0.939372	0.846429	Precision
	SGD	0.872607	0.809825	Recall	ElasticNet	0.938053	0.868421	Accuracy
	RidgeCV	0.871951	0.802885	F1-Score	Linear Regression	0.937952	0.846429	Precision
	BayesianRidge	0.871951	0.802885	F1-Score	Ridge Regression	0.937952	0.846429	Precision
	RidgeCV	0.869761	0.809825	Recall	RidgeCV	0.937952	0.846429	Precision
	BayesianRidge	0.869761	0.809825	Recall	BayesianRidge	0.937952	0.846429	Precision
	SGD	0.86931	0.802885	F1-Score	Naive Bayes	0.929803	0.872054	Recall
	SGD	0.866352	0.797306	Precision	Naive Bayes	0.929204	0.894737	Accuracy
	Bagging	0.860005	0.892992	Precision	SGD	0.929204	0.868421	Accuracy
	Bagging	0.853659	0.865854	Accuracy	ElasticNet	0.924466	0.826599	Recall
	ElasticNet	0.853659	0.829268	Accuracy	ElasticNet	0.91972	0.835498	F1-Score
	Naive Bayes	0.849593	0.878049	Accuracy	ElasticNet	0.915261	0.846429	Precision
	Naive Bayes	0.848067	0.889825	Recall	Bagging	0.912077	0.95	Precision
	KNN	0.841463	0.829268	Accuracy	Bagging	0.911504	0.921053	Accuracy
	KNN	0.838889	0.807182	Precision	Naive Bayes	0.911094	0.872054	F1-Score
	ElasticNet	0.837486	0.797306	Precision	SGD	0.900088	0.835498	F1-Score
	Naive Bayes	0.83675	0.864418	F1-Score	Naive Bayes	0.896591	0.872054	Precision
	ElasticNet	0.835366	0.802885	F1-Score	KNN	0.884956	0.947368	Accuracy
	ElasticNet	0.833395	0.809825	Recall	Linear Lasso	0.884956	0.868421	Accuracy
	Naive Bayes	0.829577	0.85136	Precision	Lasso	0.884956	0.868421	Accuracy
	Linear Lasso	0.829268	0.804878	Accuracy	Bagging	0.875111	0.894737	F1-Score
	Lasso	0.829268	0.804878	Accuracy	SGD	0.873358	0.826599	Recall
	Bagging	0.824689	0.821138	F1-Score	Linear Lasso	0.854885	0.826599	Recall
	KNN	0.812276	0.788504	F1-Score	Lasso	0.854885	0.826599	Recall
	Linear Lasso	0.809877	0.769697	Precision	KNN	0.851681	0.965517	Precision
	Lasso	0.809877	0.769697	Precision	Linear Lasso	0.850908	0.835498	F1-Score
	Linear Lasso	0.807927	0.774725	F1-Score	Lasso	0.850908	0.835498	F1-Score
	Lasso	0.807927	0.774725	F1-Score	Bagging	0.850164	0.863636	Recall
	Bagging	0.806785	0.791228	Recall	KNN	0.847503	0.932143	F1-Score
	Linear Lasso	0.80612	0.781053	Recall	Linear Lasso	0.847189	0.846429	Precision
	Lasso	0.80612	0.781053	Recall	Lasso	0.847189	0.846429	Precision
	KNN	0.797583	0.77614	Recall	KNN	0.843596	0.909091	Recall
	Abbreviations: LASSO = Least Absolute Shrinkage and Selection Operator, SVM-RFE = Support Vector Machine Recursive Feature Elimination, ANN = Artificial Neural Network, RidgeCV: Ridge Regression with Cross-Validation, RidgeCV = Ridge Regression with Cross-Validation, SGD= Stochastic Gradient Descent, KNN= K-Nearest Neighbors

## Sheet: Supplementary Data 8
		Supplementary Data 8 Top 3 markers for each cell subpopulation in GSE173896
		p_val	avg_log2FC	pct.1	pct.2	pct.1-pct.2	p_val_adj	cluster	gene
		0	5.11585	0.984	0.056	0.928	0	AdventitailFibroblast	FBLN1
		0	5.27403	0.995	0.098	0.897	0	AdventitailFibroblast	DCN
		0	3.4393	0.959	0.066	0.893	0	AdventitailFibroblast	LUM
		0	4.94754	0.984	0.037	0.947	0	AlveolarFibroblast	LUM
		0	4.24667	0.992	0.07	0.922	0	AlveolarFibroblast	DCN
		0	4.10969	0.942	0.03	0.912	0	AlveolarFibroblast	ADH1B
		0	4.1251	0.972	0.101	0.871	0	AT1	KRT7
		0	4.19543	0.952	0.104	0.848	0	AT1	GPRC5A
		0	4.04828	0.959	0.123	0.836	0	AT1	CYP4B1
		0	3.14543	0.995	0.03	0.965	0	AT2	LAMP3
		0	2.93362	0.993	0.039	0.954	0	AT2	ABCA3
		0	2.5855	0.974	0.021	0.953	0	AT2	C4BPA
		0	2.70554	0.913	0.098	0.815	0	Basal_or_Club	CXCL17
		0	2.22777	0.931	0.117	0.814	0	Basal_or_Club	KRT7
		0	2.41436	0.94	0.129	0.811	0	Basal_or_Club	ELF3
		0	3.39403	0.933	0.013	0.92	0	Bcell	CD79A
		0	2.97155	0.863	0.01	0.853	0	Bcell	MS4A1
		0	2.6735	0.833	0.045	0.788	0	Bcell	BANK1
		0	3.74297	0.989	0.018	0.971	0	Bplasma	MZB1
		0	2.69406	0.959	0.022	0.937	0	Bplasma	DERL3
		0	7.90461	0.94	0.06	0.88	0	Bplasma	JCHAIN
		0	1.64948	0.87	0.215	0.655	0	CD4Tcell	CD3D
		0	1.52322	0.883	0.239	0.644	0	CD4Tcell	CD3E
		0	1.7778	0.824	0.194	0.63	0	CD4Tcell	TRAC
		0	1.5609	0.805	0.222	0.583	0	CD8Tcell	CD3E
		0	1.62136	0.783	0.2	0.583	0	CD8Tcell	CD3D
		0	1.62118	0.819	0.254	0.565	0	CD8Tcell	CD2
		0	4.437	0.958	0.017	0.941	0	Ciliated	C20orf85
		0	4.40265	0.954	0.024	0.93	0	Ciliated	C9orf24
		0	3.9046	0.936	0.016	0.92	0	Ciliated	RSPH1
		3.80081e-206	2.33848	0.873	0.209	0.664	1.27472e-201	DCs	GPR183
		1.03922e-263	2.89036	0.786	0.142	0.644	3.48533e-259	DCs	IRF8
		3.10411e-295	1.76827	0.75	0.11	0.64	1.04106e-290	DCs	RNASE6
		0	4.20727	0.978	0.08	0.898	0	Macrophages	MARCO
		0	2.55632	0.951	0.062	0.889	0	Macrophages	GPNMB
		0	3.56645	0.955	0.075	0.88	0	Macrophages	C1QC
		0	5.25894	0.994	0.017	0.977	0	MastCell	CPA3
		0	5.9771	0.996	0.024	0.972	0	MastCell	TPSAB1
		0	4.27724	0.969	0.009	0.96	0	MastCell	MS4A2
		0	3.07494	0.968	0.127	0.841	0	Mono_or_Macro	MS4A6A
		0	2.90281	0.925	0.095	0.83	0	Mono_or_Macro	MRC1
		0	2.16576	0.936	0.106	0.83	0	Mono_or_Macro	CSF1R
		0	3.48224	0.935	0.028	0.907	0	Nerutrophil	FCN1
		0	3.04411	0.975	0.15	0.825	0	Nerutrophil	AIF1
		0	2.41264	0.942	0.128	0.814	0	Nerutrophil	CYBB
		0	3.29998	0.931	0.103	0.828	0	NK	GZMB
		0	3.19693	0.901	0.08	0.821	0	NK	KLRD1
		0	3.29256	0.909	0.107	0.802	0	NK	PRF1
		0	3.6625	0.878	0.046	0.832	0	Pericyte_or_SMA	BGN
		0	3.9353	0.975	0.17	0.805	0	Pericyte_or_SMA	CALD1
		0	3.17667	0.848	0.066	0.782	0	Pericyte_or_SMA	PPP1R14A
		0	2.75377	0.875	0.006	0.869	0	Proliferating_ImmuneCell	MKI67
		0	2.74432	0.828	0.013	0.815	0	Proliferating_ImmuneCell	TOP2A
		0	2.427	0.831	0.029	0.802	0	Proliferating_ImmuneCell	NUSAP1
		0	2.66387	0.908	0.136	0.772	0	VE_arterial	VWF
		0	2.61493	0.901	0.132	0.769	0	VE_arterial	PTPRB
		0	2.29514	0.907	0.173	0.734	0	VE_arterial	CLDN5
		0	4.90065	0.9	0.079	0.821	0	VE_capillaryA	EDNRB
		0	2.99419	0.936	0.158	0.778	0	VE_capillaryA	RAMP2
		0	3.2596	0.945	0.175	0.77	0	VE_capillaryA	GNG11
		0	3.46826	0.956	0.111	0.845	0	VE_capillaryB	CLDN5
		0	4.00669	0.899	0.08	0.819	0	VE_capillaryB	TMEM100
		0	4.35937	0.88	0.063	0.817	0	VE_capillaryB	FCN3
		0	4.82678	0.984	0.04	0.944	0	VE_vein	ACKR1
		0	3.66572	0.992	0.139	0.853	0	VE_vein	VWF
		0	2.57752	0.966	0.136	0.83	0	VE_vein	PTPRB
		All P values are two-sided.

## Sheet: Supplementary Data 9
	Supplementary Data 9 Top 3 markers for each cell subpopulation in GSE168299
	p_val	avg_log2FC	pct.1	pct.2	pct.1-pct.2	p_val_adj	cluster	gene
	0	4.18188	0.964	0.086	0.878	0	AdventitialFibroblast	Clec3b
	0	3.74348	0.94	0.065	0.875	0	AdventitialFibroblast	Col1a2
	0	3.11817	0.901	0.04	0.861	0	AdventitialFibroblast	Mfap5
	0	5.03891	0.977	0.075	0.902	0	AlveolarFibroblast	Inmt
	0	4.06669	0.908	0.068	0.84	0	AlveolarFibroblast	Hsd11b1
	0	3.12968	0.878	0.044	0.834	0	AlveolarFibroblast	Ppp1r14a
	0	6.42402	0.984	0.122	0.862	0	AT1	Ager
	0	4.51028	0.932	0.096	0.836	0	AT1	Cldn18
	0	3.73694	0.85	0.018	0.832	0	AT1	Akap5
	0	4.13573	0.913	0.028	0.885	0	AT2	S100g
	0	5.6376	0.987	0.117	0.87	0	AT2	Cxcl15
	0	4.75538	0.962	0.092	0.87	0	AT2	Chil1
	0	4.16713	0.987	0.01	0.977	0	Basal	Aqp3
	0	2.80917	0.942	0.006	0.936	0	Basal	Dapl1
	0	4.07788	0.936	0.008	0.928	0	Basal	Krt15
	0	4.99126	0.992	0.02	0.972	0	Bcell	Cd79a
	0	5.19615	0.974	0.063	0.911	0	Bcell	Ighm
	0	4.03835	0.944	0.038	0.906	0	Bcell	Cd79b
	0	4.21332	0.963	0.037	0.926	0	Ciliated	Ccdc153
	0	3.62454	0.947	0.022	0.925	0	Ciliated	Fam183b
	0	3.22527	0.938	0.02	0.918	0	Ciliated	Rsph1
	0	1.80011	0.828	0.053	0.775	0	Club	Cldn10
	0	1.01487	0.908	0.166	0.742	0	Club	Sftpb
	0	0.94984	0.867	0.127	0.74	0	Club	Sftpd
	1.11546e-227	2.6478	1	0.06	0.94	2.32372e-223	Doublets	Cd79a
	1.77165e-283	2.1178	0.944	0.044	0.9	3.6907e-279	Doublets	Trbc2
	6.36618e-141	2.38358	0.986	0.1	0.886	1.3262e-136	Doublets	Ighm
	0	4.16731	0.941	0.023	0.918	0	EC_Aerocytes	Ednrb
	0	4.32668	0.989	0.129	0.86	0	EC_Aerocytes	Car4
	0	3.7958	0.896	0.066	0.83	0	EC_Aerocytes	Fibin
	0	3.02005	0.964	0.244	0.72	0	EC_Arterial	Vwf
	0	2.37272	0.918	0.216	0.702	0	EC_Arterial	Ltbp4
	0	2.82981	0.878	0.214	0.664	0	EC_Arterial	Lyve1
	0	7.75427	0.963	0.015	0.948	0	EC_Lymphatic	Ccl21a
	0	4.75778	0.944	0.018	0.926	0	EC_Lymphatic	Mmrn1
	0	3.2976	0.875	0.057	0.818	0	EC_Lymphatic	Fxyd6
	0	4.15933	0.864	0.013	0.851	0	EC_Venous	Slc6a2
	0	3.51682	0.93	0.144	0.786	0	EC_Venous	Prss23
	0	3.66239	0.989	0.223	0.766	0	EC_Venous	Vwf
	0	8.21317	0.974	0.075	0.899	0	Erythroblast	Hbb-bt
	0	8.13052	0.987	0.092	0.895	0	Erythroblast	Hba-a2
	0	8.24919	0.996	0.12	0.876	0	Erythroblast	Hba-a1
	0	3.34557	0.913	0.114	0.799	0	gCap	Gpihbp1
	0	2.99695	0.958	0.164	0.794	0	gCap	Ptprb
	0	2.96807	0.915	0.141	0.774	0	gCap	Cd93
	0	5.0468	0.935	0.023	0.912	0	Goblet	Bpifb1
	0	4.19336	0.935	0.023	0.912	0	Goblet	Tff2
	0	5.30732	0.916	0.027	0.889	0	Goblet	Reg3g
	0	4.99961	0.981	0.025	0.956	0	Macrophages	Ear2
	0	5.64924	1	0.054	0.946	0	Macrophages	Chil3
	0	3.33939	0.936	0.014	0.922	0	Macrophages	Mrc1
	0	3.94642	0.932	0.005	0.927	0	MastCell	Cyp11a1
	0	5.99393	0.974	0.056	0.918	0	MastCell	Ccl3
	0	6.59453	0.982	0.066	0.916	0	MastCell	Ccl4
	0	6.95416	0.999	0.021	0.978	0	Megakaryocytes	Nrgn
	0	7.32794	0.991	0.014	0.977	0	Megakaryocytes	Ppbp
	0	7.362	0.997	0.024	0.973	0	Megakaryocytes	Pf4
	0	4.45793	0.978	0.009	0.969	0	Mesothelium	Upk3b
	0	4.72903	0.973	0.019	0.954	0	Mesothelium	Msln
	0	3.83319	0.971	0.035	0.936	0	Mesothelium	Gpm6a
	0	3.31778	0.957	0.071	0.886	0	Mono_Macro	Ctss
	0	2.68637	0.978	0.117	0.861	0	Mono_Macro	Tyrobp
	0	3.25232	0.901	0.044	0.857	0	Mono_Macro	Cybb
	9.85077e-269	2.36742	0.99	0.069	0.921	2.05211e-264	Monocytes	Clec4d
	5.35134e-272	2.97283	0.979	0.068	0.911	1.11479e-267	Monocytes	S100a8
	6.24848e-302	2.42767	0.969	0.059	0.91	1.30168e-297	Monocytes	Slc7a11
	0	7.54459	0.985	0.037	0.948	0	Neutriphil	S100a8
	0	7.88704	0.992	0.058	0.934	0	Neutriphil	S100a9
	0	4.84159	0.94	0.03	0.91	0	Neutriphil	Slc7a11
	0	4.9134	0.996	0.03	0.966	0	NK	Nkg7
	0	5.9758	1	0.037	0.963	0	NK	Ccl5
	0	6.7742	0.971	0.009	0.962	0	NK	Gzma
	4.09632e-77	1.69723	0.897	0.079	0.818	8.53345e-73	pDC	Ptprcap
	2.04e-57	2.49423	0.949	0.141	0.808	4.24972e-53	pDC	Cdk6
	2.77811e-137	1.60563	0.846	0.04	0.806	5.78736e-133	pDC	Nkg7
	0	2.30447	0.9	0.19	0.71	0	Pericyte_or_SMA	Sparcl1
	0	1.65466	0.868	0.167	0.701	0	Pericyte_or_SMA	Bgn
	0	2.97709	0.706	0.031	0.675	0	Pericyte_or_SMA	Des
	0	3.65262	0.894	0.014	0.88	0	Tcell	Trbc2
	0	2.99922	0.865	0.008	0.857	0	Tcell	Cd3g
	0	2.96758	0.863	0.008	0.855	0	Tcell	Cd3d
	All P values are two-sided.

## Sheet: Supplementary Data 10
	Supplementary Data 10 Summary statistics of GWAS used in this study
	GWAS ID	Year	Trait	Consortium/Author	Sample size	Number of SNPs	PMID
	ebi-a-GCST007432	2019	FEV1	Shrine N	321047	19674931	30804560
	ebi-a-GCST007431	2019	Lung function (FEV1/FVC)	Shrine N	321047	19671887	30804560
	ebi-a-GCST007429	2019	Lung function (FVC)	Shrine N	321047	19671887	30804560
	ukb-d-COPD_EXCL	2018	COPD differential diagnosis	Neale lab	361194	13586589	33574079
	ieu-b-106	2021	FEV1/FVC < 0.7	Higbee D	353315	12321875	34294062
	GTEx_v8	2020	Lung	GTEx_v8	515	-	32913098
	GTEx_v8	2020	Whole_Blood	GTEx_v8	755	-	32913098
	Abbreviations: FEV1: forced expired volume in 1 second; FVC: forced vital capacity; FEV1/FVC = forced expired volume in 1 second/forced vital capacity ratio; GTEx_v8 = Genotype-Tissue Expression Project Version 8

[truncated: 18 more sheets: Supplementary Data 11, Supplementary Data 12, Supplementary Data 13, Supplementary Data 14, Supplementary Data 15, Supplementary Data 16, Supplementary Data 17, Supplementary Data 18, Supplementary Data 19, Supplementary Data 20, Supplementary Data 21, Supplementary Data 22, Supplementary Data 23, Supplementary Data 24, Supplementary Data 25, Supplementary Data 26, Supplementary Data 27, Supplementary Data 28]
